# Supplementary material for: Coordination assembly enables highly selective catalytic hydroaminomethylation of olefins
Source: Royal Society of Chemistry journal article supplement (doi:10.1039/d2gc04195b), 2022-11-29
Supplement: d2gc04195b1.pdf [file d2gc04195b1.pdf]

Electronic Supplementary Information for

## **Coordination Assembly Enables Highly Selective Catalytic Hydroaminomethylation of Olefins**

Chun Qian,<sup>a</sup> Qingshu Zheng,<sup>a</sup> Jie Chen,<sup>a</sup> Bo Tu,<sup>a,\*</sup> and Tao Tu<sup>a,b,c\*</sup>

<sup>a</sup> Shanghai Key Laboratory of Molecular Catalysis and Innovative Materials, Department of Chemistry, Fudan University, 2005 Songhu Road, Shanghai 200438, China

<sup>b</sup> State Key Laboratory of Organometallic Chemistry, Shanghai Institute of Organic Chemistry, Chinese Academy of Sciences, Shanghai 200032, China

<sup>c</sup> Green Catalysis Center and College of Chemistry, Zhengzhou University, Zhengzhou 450001, China

\* **Email:** [taotu@fudan.edu.cn](mailto:taotu@fudan.edu.cn) and [botu@fudan.edu.cn](mailto:botu@fudan.edu.cn)

## Table of Contents

|                                                                                                 |     |
|-------------------------------------------------------------------------------------------------|-----|
| 1. General.....                                                                                 | 3   |
| 2. Synthesis of catalysts and substrates.....                                                   | 4   |
| 3. Optimization of reaction conditions.....                                                     | 9   |
| 4. General procedure for the hydroaminomethylation of olefins.....                              | 11  |
| 5. SEM, TEM, EDX & HAADF-STEM images of coordination assemblies.....                            | 30  |
| 6. XPS, PXRD, Solid-state <sup>13</sup> C NMR, FT-IR, TG & N <sub>2</sub> sorption studies..... | 35  |
| 7. XANES, <i>k</i> <sup>2</sup> -weighted EXAFS & Gel permeation chromatography studies.....    | 46  |
| 8. Gel permeation chromatography (GPC) Study.....                                               | 49  |
| 9. Metal-leaching tests with ICP-AES.....                                                       | 50  |
| 10. <sup>1</sup> H, <sup>13</sup> C and <sup>19</sup> F NMR spectra.....                        | 52  |
| 11. High-resolution mass spectra.....                                                           | 123 |
| 12. Crystallography.....                                                                        | 125 |
| 13. The calculated steric bulkiness of oligomer analogues.....                                  | 169 |
| 14. References.....                                                                             | 171 |

## 1. General

All commercial reagents were used directly without further purification, unless otherwise stated. Dry *N,N*-dimethylformamide (DMF) was purchased from Alfa Aesar, stored over 4 Å molecular sieves, and handled under N<sub>2</sub> atmosphere. All reaction vials were purchased from Beijing Synthware Glass. CDCl<sub>3</sub> was purchased from Cambridge Isotope Laboratories. <sup>1</sup>H, <sup>13</sup>C and <sup>19</sup>F NMR spectra were recorded on Jeol ECA-400 and Bruker 400 DRX spectrometers. The chemical shifts (δ) for <sup>1</sup>H NMR are given in parts per million (ppm) referenced to the residual proton signal of the deuterated solvent (CHCl<sub>3</sub> at δ 7.26 ppm); coupling constants are expressed in hertz (Hz). <sup>13</sup>C NMR spectra were referenced to the carbon signal of CDCl<sub>3</sub> (77.0 ppm). The following abbreviations are used to describe NMR signals: s = singlet, d = doublet, t = triplet, m = multiplet, dd = doublet of doublets, q = quartet. ESI-MS spectra were recorded on a Bruker microTOF II instrument. IR spectra were recorded on AVATAR FT-IR 360 instrument. Powder XRD studies were performed on a Bruker AXS D8. SEM experiments were carried out on a Philips XL30 microscope operated at 20 kV. TEM experiments were carried out on a JEOL JEM-2010 transmission electron microscope. The AC-HAADF-STEM images was collected on a JEOL JEM-ARM200F operated at 300 kV, with a guaranteed resolution of 80 pm. The X-ray photoemission spectroscopy (XPS) was performed in a PHI 5000C ESCA system. BET experiments were performed on a Quantachrome AUTOSORB-IQ. TGA were performed on a TA SDT Q600. The X-ray absorption spectra including X-ray absorption near-edge structure (XANES) and extended X-ray absorption fine structure (EXAFS) at the K-edge of Rh of the samples were collected at the BL 14W1 of Shanghai Synchrotron Radiation Facility (SSRF), China.

## 2. Synthesis of catalysts and substrates

### 2.1 Synthesis of NHC-Rh complexes

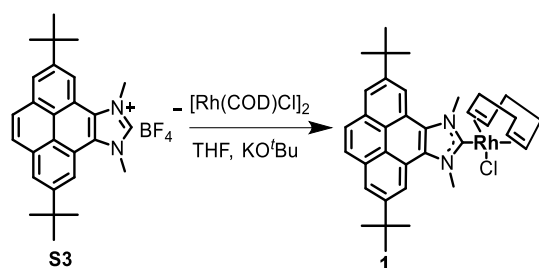

**Fig. S1.** Synthesis of mono-NHC-Rh complex **1**

Slat **S3** was synthesized according to the literature reports <sup>1</sup>.

**S3** (brown solid, 73 % yield). <sup>1</sup>H NMR (400 MHz, DMSO-*d*<sub>6</sub>) δ 9.73 (s, 1H), 8.85 (d, *J* = 1.7 Hz, 2H), 8.56 (d, *J* = 1.6 Hz, 2H), 8.29 (s, 2H), 4.70 (s, 6H), 1.61 (s, 18H) ppm;

<sup>19</sup>F NMR (376 MHz, DMSO-*d*<sub>6</sub>) δ = -148.27 ppm.

Synthesis of mono-NHC-Rh complex **1**: A Schlenk tube was charged with salt **S3** (178.7 mg, 0.380 mmol), KOtBu (47.0 mg, 0.419 mmol), [Rh(COD)Cl]<sub>2</sub> (93.8 mg, 0.190 mmol), THF (3 mL) and stirred for 12 hours at ambient temperature under nitrogen atmosphere. After reaction completion, solvent was removed under vacuum, and the residue was purified over flash chromatography on silica gel (CH<sub>2</sub>Cl<sub>2</sub>/methanol = 800:1) to obtain yellow solid (212.4 mg, 89% yield).

<sup>1</sup>H NMR (400 MHz, CDCl<sub>3</sub>) δ 8.82 (d, *J* = 1.8 Hz, 2H), 8.18 (d, *J* = 1.7 Hz, 2H), 8.04 (s, 2H), 5.25-5.20 (m, 2H), 5.12 (s, 6H), 3.50 (t, *J* = 4.3 Hz, 2H), 2.61-2.50 (m, 4H), 2.11-2.01 (m, 4H), 1.61 (s, 18H) ppm;

<sup>13</sup>C NMR (101 MHz, CDCl<sub>3</sub>) δ 190.4 (d, *J* = 51.4 Hz), 190.1, 148.7, 131.7, 129.3, 128.2, 122.0, 121.1, 120.8, 116.0, 99.4, 99.3, 68.7, 68.5, 40.2, 35.4, 33.0, 31.9, 29.0 ppm;

HR-MS (ESI/TOF) *m/z*: Calcd. for C<sub>35</sub>H<sub>42</sub>N<sub>2</sub>Rh 593.2403; Found: 593.2422.

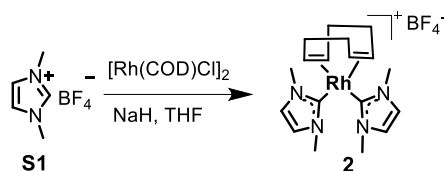

**Fig. S2.** Synthesis of bis-NHC-Rh complexes **2**

Synthesis of bis-NHC-Rh complex **2**: A Schlenk tube was charged with salt **S1** (184 mg, 1 mmol), [Rh(COD)Cl]<sub>2</sub> (123 mg, 0.25 mmol), NaH (60%, 52 mg, 1.3 mmol), dry THF (10 mL) and stirred for 12 hours at ambient temperature under nitrogen atmosphere. After reaction completion, solvent was removed under vacuum, and the residue was purified over flash chromatography on silica gel using CH<sub>2</sub>Cl<sub>2</sub>/methanol (100:1) mixture as eluent to obtain yellow solid (55 mg, 45% yield). <sup>1</sup>H NMR (400 MHz, DMSO-*d*<sub>6</sub>) δ 7.26 (s, 4H), 4.18 (s, 4H), 3.94 (s, 12H), 2.41 (d, *J* = 10.1 Hz, 4H), 2.10 (q, *J* = 7.6



Hz, 4H) ppm;

$^{13}\text{C}$  NMR (101 MHz, DMSO- $d_6$ )  $\delta$  180.2 (d,  $J = 53.9$  Hz), 123.6, 88.4, 88.3, 38.3, 30.8 ppm;

$^{19}\text{F}$  NMR (376 MHz, DMSO- $d_6$ )  $\delta = -148.26$  ppm;

HR-MS (ESI/TOF)  $m/z$ : Calcd. for  $\text{C}_{18}\text{H}_{28}\text{N}_4\text{Rh}$  403.1369; Found: 403.1367.

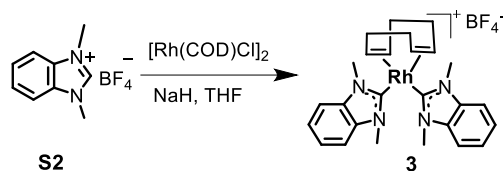

Fig. S3. Synthesis of bis-NHC-Rh complex **3**

Synthesis of bis-NHC-Rh complex **3**: A Schlenk tube using salt **S2** (234 mg, 1 mmol),  $[\text{Rh}(\text{COD})\text{Cl}]_2$  (123 mg, 0.25 mmol), NaH (60%, 52 mg, 1.3 mmol), dry THF (10 mL) and stirred for 12 hours at ambient temperature under nitrogen atmosphere. After reaction completion, solvent was removed under vacuum, and the residue was purified over flash chromatography on silica gel using  $\text{CH}_2\text{Cl}_2$ /methanol (80:1) mixture as eluent to obtain yellow solid (102 mg, 69% yield).

$^1\text{H}$  NMR (400 MHz, DMSO- $d_6$ )  $\delta$  7.54 (dd,  $J = 6.0, 3.1$  Hz, 4H), 7.28 (dd,  $J = 6.1, 3.1$  Hz, 4H), 4.48 (s, 4H), 4.29 (s, 12H), 2.62-2.54 (m, 4H), 2.26 (d,  $J = 8.6$  Hz, 4H) ppm;

$^{13}\text{C}$  NMR (101 MHz, DMSO- $d_6$ )  $\delta$  193.6 (d,  $J = 53.9$  Hz), 135.3, 123.0, 110.7, 91.0, 55.4, 36.0, 30.8 ppm;

$^{19}\text{F}$  NMR (376 MHz, DMSO- $d_6$ )  $\delta = -148.32$  ppm;

HR-MS (ESI/TOF)  $m/z$ : Calcd. for  $\text{C}_{26}\text{H}_{32}\text{N}_4\text{Rh}$  503.1682; Found: 503.1677.

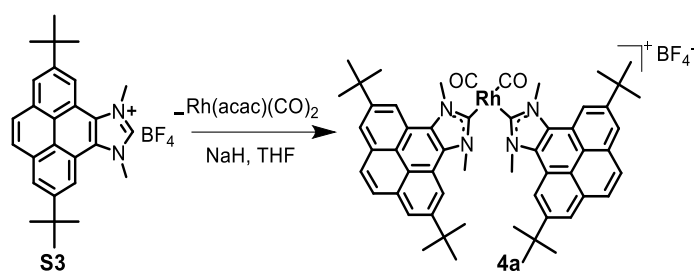

Fig. S4. Synthesis of bis-NHC-Rh complex **4a**.

Synthesis of bis-NHC-Rh complex **4a**: A Schlenk tube using salt **S3** (470 mg, 1 mmol),  $[\text{Rh}(\text{acac})(\text{CO})_2]$  (65 mg, 0.25 mmol), NaH (60%, 52 mg, 1.3 mmol), dry THF (10 mL) and stirred for 12 hours at ambient temperature under nitrogen atmosphere. After reaction completion, solvent was removed under vacuum, and the residue was purified over flash chromatography on silica gel using  $\text{CH}_2\text{Cl}_2$ /methanol (80:1) mixture as eluent to obtain yellow solid (159 mg, 63% yield).

$^1\text{H}$  NMR (400 MHz,  $\text{CDCl}_3$ )  $\delta$  8.87 (s, 4H), 8.22 (s, 4H), 8.03 (s, 4H), 4.96 (s, 12H), 1.58 (s, 36H) ppm;

$^{13}\text{C}$  NMR (101 MHz, DMSO- $d_6$ )  $\delta$  180.3 (d,  $J = 15.2$  Hz), 171.9, 149.3, 131.7, 129.7, 128.7, 123.6, 120.9,

120.7, 117.4, 41.3, 35.7, 32.0 ppm;

$^{19}\text{F}$  NMR (376 MHz,  $\text{CDCl}_3$ )  $\delta = -152.33$  ppm;

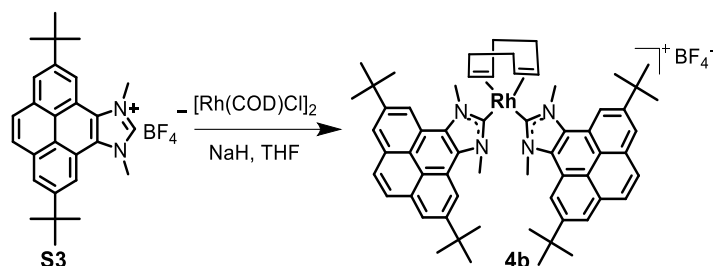

**Fig. S5.** Synthesis of bis-NHC-Rh complex **4b**.

Synthesis of bis-NHC-Rh complex **4b**: A Schlenk tube using salt **S3** (470 mg, 1 mmol),  $[\text{Rh}(\text{COD})\text{Cl}]_2$  (123 mg, 0.25 mmol), NaH (60%, 52 mg, 1.3 mmol), dry THF (10 mL) and stirred for 12 hours at ambient temperature under nitrogen atmosphere. After reaction completion, solvent was removed under vacuum, and the residue was purified over flash chromatography on silica gel using  $\text{CH}_2\text{Cl}_2$ /methanol (80:1) mixture as eluent to obtain yellow solid (185 mg, 76% yield).

$^1\text{H}$  NMR (400 MHz,  $\text{CDCl}_3$ )  $\delta$  8.91 (d,  $J = 1.7$  Hz, 4H), 8.17 (d,  $J = 1.6$  Hz, 4H), 7.99 (s, 4H), 5.25 (s, 12H), 4.60 (s, 4H), 2.79 (d,  $J = 10.4$  Hz, 4H), 2.30 (d,  $J = 8.9$  Hz, 4H), 1.62 (s, 36H) ppm;

$^{13}\text{C}$  NMR (101 MHz,  $\text{CDCl}_3$ )  $\delta$  188.0 (d,  $J = 55.1$  Hz), 149.2, 131.6, 129.6, 128.1, 122.6, 120.9, 120.7, 116.3, 91.1, 91.0, 41.7, 35.4, 31.8, 30.8 ppm;

$^{19}\text{F}$  NMR (376 MHz,  $\text{CDCl}_3$ )  $\delta = -153.21$  ppm;

HR-MS (ESI/TOF)  $m/z$ : Calcd. for  $\text{C}_{62}\text{H}_{72}\text{N}_4\text{Rh}$  975.4812; Found: 975.4841.

## 2.2 General synthetic procedure of NHC-Rh coordination assemblies

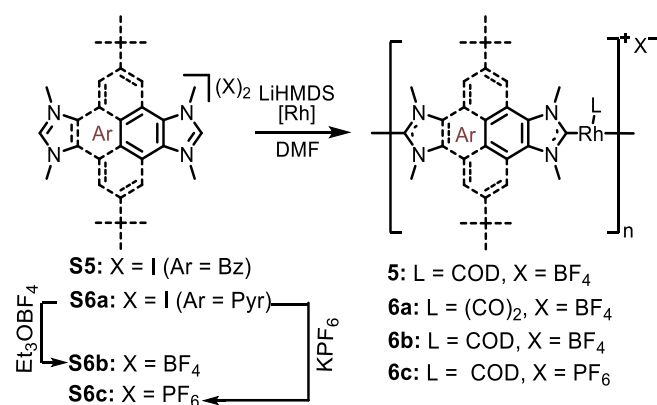

**Fig. S6.** General synthetic procedure of NHC-Rh coordination assemblies.

Bis-imidazolium salts **S5**, **S6a** were synthesized according to the literature reports <sup>2</sup>.

**S5** (brown solid, 84 % yield).  $^1\text{H}$  NMR (400 MHz,  $\text{DMSO}-d_6$ )  $\delta$  9.89 (s, 2H), 8.80 (s, 2H), 4.18 (s, 12H)

ppm.

**S6a** (brown solid, 63 % yield).  $^1\text{H NMR}$  (400 MHz,  $\text{DMSO-}d_6$ )  $\delta$  9.83 (s, 2H), 9.03 (s, 4H), 4.74 (s, 12H), 1.67 (s, 18H) ppm.

**S6b**: A Schlenk tube was charged with **S6a** (184 mg, 0.26 mmol), triethyloxonium tetrafluoroborate (117 mg, 1.04 mmol), dry  $\text{CH}_2\text{Cl}_2$  (5 mL), and stirred at ambient temperature for 12 hours, methanol (3 mL) was then added. The resulting reaction mixture was stirred for an additional hour and then poured into excess diethyl ether (50 mL). After precipitation completed, the solids were collected via filtration and dried under reduced pressure to afford the desired salts as a white powder in 94% yield.

$^1\text{H NMR}$  (400 MHz,  $\text{DMSO-}d_6$ )  $\delta$  9.88 (s, 2H), 9.04 (s, 4H), 4.77 (s, 12H), 1.69 (s, 18H) ppm.

$^{13}\text{C NMR}$  (101 MHz,  $\text{DMSO-}d_6$ )  $\delta$  = 150.8, 143.6, 127.5, 121.4, 120.4, 118.9, 54.8, 36.1, 31.6 ppm;

$^{19}\text{F NMR}$  (376 MHz,  $\text{DMSO-}d_6$ )  $\delta$  = -148.29 ppm.

Salt **S6c**: To a solution of salt **S6a** (184 mg, 0.26 mmol) in 5 mL  $\text{H}_2\text{O}$  was added  $\text{KPF}_6$  (191 mg, 1.04 mmol) and reaction mixture was stirred for 3 hours at ambient temperature. After precipitation completed, the solids were collected via filtration and dried under reduced pressure to afford the desired salts as a white powder, 86% yield.

$^1\text{H NMR}$  (400 MHz,  $\text{DMSO-}d_6$ )  $\delta$  9.88 (s, 2H), 9.04 (s, 4H), 4.77 (s, 12H), 1.69 (s, 18H) ppm;

$^{19}\text{F NMR}$  (376 MHz,  $\text{DMSO-}d_6$ )  $\delta$  = -69.21, -71.11 ppm.

NHC-Rh coordination assemblies **5** and **6a-6c**: bis-imidazolium salts **S5** or **S6a-6c** (0.5 mmol) and corresponding rhodium precursor ( $[\text{Rh}(\text{acac})(\text{CO})_2]$  (0.5 mmol) or  $[\text{Rh}(\text{COD})\text{Cl}]_2$  (0.25 mmol) were dissolved in DMF (5 mL) under  $\text{N}_2$  at room temperature, LiHMDS (1 mmol) solution in THF was added dropwise. The resulting mixture was stirred at 80 °C for 24 h. After cooling to room temperature, the precipitate was washed by DMF, deionized water and methanol successively. Further purification of the solid was carried out by Soxhlet extraction from methanol for 48 h. The product was dried in vacuum for 24 h at 60 °C to give dark-brown solid.

NHC-Rh coordination assembly **5**: dark-brown solid, 99% yield;

**IR** (KBr pellet)  $\nu$  446.75, 662.39, 745.33, 828.32, 867.96, 1104.61, 1256.68, 1384.47, 1463.08, 1589.98, 1655.98, 1947.24, 2929.90, 3396.47  $\text{cm}^{-1}$ ;

**Elemental analysis** (%) Calcd. for  $(\text{C}_{20}\text{H}_{26}\text{BF}_4\text{N}_4\text{Rh})_n$ : C, 46.90; H, 5.12; N, 10.94; found: C, 46.75; H, 5.31; N, 10.81.

NHC-Rh coordination assembly **6a**: dark-brown solid, 92% yield;

**IR** (KBr pellet)  $\nu$  440.98, 660.64, 726.70, 747.54, 812.93, 844.41, 862.07, 923.34, 1092.44, 1246.78, 1371.43, 1472.66, 1613.14, 1663.55, 1965.51, 2121.69, 2954.90, 3416.58  $\text{cm}^{-1}$ ;

**Elemental analysis** (%) Calcd. for  $(\text{C}_{32}\text{H}_{35}\text{RhN}_4\text{O}_2 \cdot \text{BF}_4)_n$ : C, 55.09; H, 5.02; N, 8.03; found: C, 54.97; H, 5.62; N, 8.21.

NHC-Rh coordination assembly **6b**: dark-brown solid, 97% yield;

**IR** (KBr pellet)  $\nu$  436.72, 727.09, 744.28, 816.01, 861.10, 923.91, 948.90, 1058.91, 1247.16, 1372.27,

1471.17, 1612.26, 1659.73, 1950.07, 2953.16, 3405.68 cm<sup>-1</sup>;

**Solid <sup>13</sup>C NMR** (101 MHz)  $\delta$  = 187.3, 168.7, 149.5, 129.7, 121.4, 62.4, 55.3, 40.4, 36.0, 31.7 ppm;

**Elemental analysis** (%) *Calcd. for* (C<sub>38</sub>H<sub>47</sub>RhN<sub>4</sub>BF<sub>4</sub>)<sub>n</sub>: C, 60.88; H, 7.28; N, 7.48; *found*: C, 60.72; H, 7.83; N, 7.23.

NHC-Rh coordination assembly **6c**: dark-brown solid, 93% yield;

**IR** (KBr pellet)  $\nu$  446.63, 726.43, 747.38, 817.65, 862.32, 924.07, 1087.50, 1246.70, 1372.80, 1470.27, 1612.15, 1663.47, 1950.29, 2953.95, 3417.64 cm<sup>-1</sup>;

**Elemental analysis** (%) *Calcd. for* (C<sub>38</sub>H<sub>47</sub>RhN<sub>4</sub>PF<sub>6</sub>)<sub>n</sub>: C, 56.51; H, 5.82; N, 6.94; *found*: C, 56.23; H, 5.96; N, 6.76.

### 3. Optimization of reaction conditions

Table S1. Optimization for hydroaminomethylation of allylbenzene <sup>a</sup>

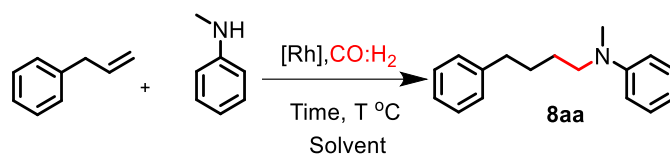

| Entry | [Cat.]<br>(mol %)        | CO/H <sub>2</sub><br>(bar) | Solvent<br>(4 mL) | Temp<br>(°C) | Time<br>(h) | Yield <sup>b</sup><br>(%) | I/b <sup>c</sup> |
|-------|--------------------------|----------------------------|-------------------|--------------|-------------|---------------------------|------------------|
| 1     | <b>5</b> (1.0)           | 60bar (1:5)                | THF               | 100          | 12          | 51                        | 64/36            |
| 2     | <b>5</b> (1.0)           | 60bar (1:5)                | THF               | 120          | 1           | 48                        | 58/42            |
| 3     | <b>5</b> (1.0)           | 60bar (1:5)                | THF               | 130          | 12          | 47                        | 54/46            |
| 4     | <b>5</b> (1.0)           | 60bar (1:5)                | THF               | 140          | 12          | 50                        | 55/45            |
| 5     | <b>5</b> (1.0)           | 60bar (1:5)                | Tol               | 140          | 12          | 20                        | 88/12            |
| 6     | <b>5</b> (1.0)           | 60bar (1:5)                | anisole           | 140          | 12          | 58                        | 65/35            |
| 7     | <b>5</b> (1.0)           | 60bar (1:5)                | dioxane           | 140          | 12          | 42                        | 85/15            |
| 8     | <b>5</b> (1.0)           | 60bar (1:5)                | MeOH              | 140          | 12          | 36                        | 89/11            |
| 9     | <b>5</b> (1.0)           | 60bar (1:5)                | THF/MeOH          | 140          | 12          | 40                        | 73/27            |
| 10    | <b>5</b> (1.0)           | 60bar (1:5)                | Tol/MeOH          | 140          | 12          | 54                        | 63/37            |
| 11    | <b>5</b> (1.0)           | 60bar (1:5)                | THF               | 140          | 18          | 53                        | 55/45            |
| 12    | <b>5</b> (1.0)           | 60bar (1:5)                | THF               | 140          | 24          | 52                        | 55/45            |
| 13    | <b>5</b> (1.0)           | 70bar (1:5)                | THF               | 140          | 18          | 59                        | 66/34            |
| 14    | <b>5</b> (1.0)           | 80bar (1:5)                | THF               | 140          | 18          | 70                        | 77/23            |
| 15    | <b>5</b> (1.0)           | 80bar (1:6)                | THF               | 140          | 18          | 72                        | 85/15            |
| 16    | <b>5</b> (1.0)           | 80bar (1:7)                | THF               | 140          | 18          | 72                        | 89/11            |
| 17    | <b>5</b> (1.0)           | 80bar (1:8)                | THF               | 140          | 18          | 66                        | 91/9             |
| 18    | <b>5</b> (1.0)           | 80bar (1:9)                | THF               | 140          | 18          | 72                        | 91/9             |
| 19    | <b>5</b> ( <b>1.0</b> )  | 80bar (1:12)               | THF               | 140          | 18          | 67                        | 97/3             |
| 20    | <b>5</b> (1.0)           | 80bar (1:9)                | THF               | 150          | 18          | 77                        | 88/12            |
| 21    | <b>6a</b> (1.0)          | 80bar (1:9)                | THF               | 150          | 18          | 89                        | 97/3             |
| 22    | <b>6b</b> ( <b>1.0</b> ) | <b>80bar (1:9)</b>         | <b>THF</b>        | <b>150</b>   | <b>18</b>   | <b>95</b>                 | <b>97/3</b>      |
| 23    | <b>6b</b> ( <b>1.0</b> ) | <b>80bar (1:9)</b>         | <b>THF</b>        | <b>150</b>   | <b>18</b>   | <b>96</b>                 | <b>98/2</b>      |
| 24    | <b>6b</b> ( <b>1.0</b> ) | <b>80bar (1:9)</b>         | <b>THF</b>        | <b>150</b>   | <b>18</b>   | <b>95</b>                 | <b>97/3</b>      |
| 25    | <b>6c</b> ( <b>1.0</b> ) | 80bar (1:9)                | THF               | 150          | 18          | 86                        | 93/7             |
| 26    | <b>1</b> ( <b>1.0</b> )  | 80bar (1:9)                | THF               | 150          | 18          | 50                        | 67/33            |
| 27    | <b>2</b> (1.0)           | 80bar (1:9)                | THF               | 150          | 18          | 20                        | 58/42            |
| 28    | <b>3</b> (1.0)           | 80bar (1:9)                | THF               | 150          | 18          | 50                        | 63/37            |
| 29    | <b>4b</b> (1.0)          | 80bar (1:9)                | THF               | 150          | 18          | 71                        | 84/16            |
| 30    | <b>6b</b> (0.5)          | 80bar (1:9)                | THF               | 150          | 18          | 65                        | 86/14            |
| 31    | <b>6b</b> (0.3)          | 80bar (1:9)                | THF               | 150          | 18          | 52                        | 83/17            |
| 32    | /                        | 80bar (1:9)                | THF               | 150          | 18          | NR                        | N/A              |
| 33    | <b>6b</b> (1.0)          | 70bar (1:9)                | THF               | 150          | 18          | 88                        | 92/8             |
| 34    | <b>6b</b> (1.0)          | 80bar (1:9)                | THF               | 140          | 18          | 89                        | 95/5             |
| 35    | <b>6b</b> (1.0)          | 60bar (1:9)                | THF               | 150          | 18          | 76                        | 91/9             |

---

|    |                 |             |     |     |    |    |      |
|----|-----------------|-------------|-----|-----|----|----|------|
| 36 | <b>6b</b> (1.0) | 80bar (1:9) | THF | 130 | 18 | 79 | 95/5 |
|----|-----------------|-------------|-----|-----|----|----|------|

---

<sup>a</sup> 1.25 mmol of allylbenzene, 0.5 mmol *N*-methylaniline. <sup>b</sup>Isolated yields. <sup>c</sup> Regioselectivities were determined by <sup>1</sup>H NMR of the crude reaction mixture.

#### 4. General procedure for the hydroaminomethylation of olefins

The hydroaminomethylation reactions were carried out in a Parr stainless steel autoclave (125 mL). In a typical experiment, the autoclave was loaded with a mixture of **6b** (1.0 mol %), 1.25 mmol olefins, 0.5 mmol amines and 4.0 mL THF. Subsequently, the autoclave was pressurized with CO (8 bar) and hydrogen (72 bar) and heated to 150 °C. After 18 h, the autoclave was allowed to cool to room temperature and the gases were vented. The solvent was removed under vacuum, regioselectivities were determined by <sup>1</sup>H NMR of the crude reaction mixture. And then the product was purified by column chromatography and the product was analyzed by NMR spectroscopy.

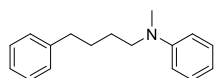

**9aa.**<sup>3</sup> Yellow oil (114 mg, 95% yield) was obtained after column chromatography (petroleum ether / ethyl acetate = 400:1).

<sup>1</sup>H NMR (400 MHz, CDCl<sub>3</sub>) δ 7.33-7.19 (m, 7H), 6.71 (t, *J* = 7.5 Hz, 3H), 3.35 (t, *J* = 6.8 Hz, 2H), 2.94 (s, 3H), 2.67 (t, *J* = 7.0 Hz, 2H), 1.72-1.63 (m, 4H) ppm;

<sup>13</sup>C NMR (101 MHz, CDCl<sub>3</sub>) δ 149.3, 142.3, 129.1, 128.4, 128.3, 125.7, 115.9, 112.1, 52.6, 38.3, 35.8, 29.0, 26.4 ppm.

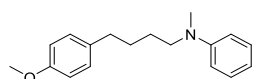

**9ba.** Yellow oil (121 mg, 90% yield) was obtained after column chromatography (petroleum ether / ethyl acetate = 100:1).

<sup>1</sup>H NMR (400 MHz, CDCl<sub>3</sub>) δ 7.36-7.29 (m, 2H), 7.18 (d, *J* = 8.2 Hz, 2H), 6.92 (d, *J* = 8.5 Hz, 2H), 6.82-6.74 (m, 3H), 3.87 (s, 3H), 3.42 (d, *J* = 6.7 Hz, 2H), 2.99 (s, 3H), 2.72-2.64 (m, 2H), 1.72 (q, *J* = 3.7 Hz, 4H) ppm;

<sup>13</sup>C NMR (101 MHz, CDCl<sub>3</sub>) δ 157.8, 149.4, 134.5, 129.3, 129.2, 115.9, 113.8, 112.2, 55.3, 52.7, 38.4, 35.0, 29.3, 26.4 ppm;

**HR-MS** (ESI/TOF) *m/z*: Calcd. for C<sub>18</sub>H<sub>23</sub>NO [M+H]<sup>+</sup> 270.1852; Found: 270.1844.

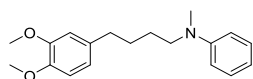

**9ca.** Yellow oil (145 mg, 97% yield) was obtained after column chromatography (petroleum ether / ethyl acetate = 50:1).

<sup>1</sup>H NMR (400 MHz, CDCl<sub>3</sub>) δ 7.32-7.24 (m, 2H), 6.84 (d, *J* = 7.9 Hz, 1H), 6.79-6.70 (m, 5H), 3.91 (d, *J* = 3.3 Hz, 6H), 3.39 (t, *J* = 5.2 Hz, 2H), 2.96 (s, 3H), 2.68-2.59 (m, 2H), 1.69 (q, *J* = 3.8 Hz, 4H) ppm;

<sup>13</sup>C NMR (101 MHz, CDCl<sub>3</sub>) δ 149.4, 148.8, 147.2, 135.0, 129.2, 120.2, 115.9, 112.1, 111.7, 111.3, 56.0, 55.9, 52.7, 38.4, 35.5, 29.3, 26.5 ppm.

**HR-MS** (ESI/TOF) *m/z*: Calcd. for C<sub>19</sub>H<sub>26</sub>NO<sub>2</sub> [M+H]<sup>+</sup> 300.1958; Found: 300.1949.

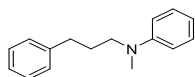

**9da.**<sup>4</sup> Yellow oil (93 mg, 92% yield) was obtained after column chromatography (petroleum ether / ethyl acetate = 400:1).

**<sup>1</sup>H NMR** (400 MHz, CDCl<sub>3</sub>) δ 7.34 (t, *J* = 7.5 Hz, 2H), 7.30-7.22 (m, 5H), 6.73 (d, *J* = 8.0 Hz, 3H), 3.43-3.36 (m, 2H), 2.97 (s, 3H), 2.71 (t, *J* = 7.7 Hz, 2H), 2.02-1.92 (m, 2H) ppm;

**<sup>13</sup>C NMR** (101 MHz, CDCl<sub>3</sub>) δ 149.3, 141.8, 129.2, 128.39, 128.36, 125.9, 116.0, 112.2, 52.3, 38.3, 33.4, 28.2 ppm.

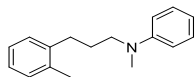

**9ea-o.** Yellow oil (113 mg, 94% yield) was obtained after column chromatography (petroleum ether / ethyl acetate = 400:1).

**<sup>1</sup>H NMR** (400 MHz, CDCl<sub>3</sub>) δ 7.34 (d, *J* = 8.5, 3.9 Hz, 2H), 7.25 (dd, *J* = 8.6, 4.2 Hz, 4H), 6.81-6.75 (m, 3H), 3.56-3.43 (m, 2H), 3.06 (s, 3H), 2.80-2.69 (m, 2H), 2.43 (s, 3H), 2.05-1.91 (m, 2H) ppm;

**<sup>13</sup>C NMR** (101 MHz, CDCl<sub>3</sub>) δ 149.5, 140.1, 135.9, 130.3, 129.3, 128.7, 126.12, 126.08, 116.2, 112.4, 52.6, 38.4, 30.8, 27.2, 19.4 ppm;

**HR-MS** (ESI/TOF) *m/z*: Calcd. for C<sub>17</sub>H<sub>22</sub>N [M+H]<sup>+</sup> 240.1752; Found: 240.1762.

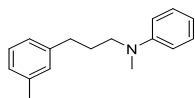

**9ea-m.**<sup>5</sup> Yellow oil (108 mg, 90% yield) was obtained after column chromatography (petroleum ether / ethyl acetate = 400:1).

**<sup>1</sup>H NMR** (400 MHz, CDCl<sub>3</sub>) δ 7.30-7.19 (m, 3H), 7.09-7.02 (m, 3H), 6.73 (dd, *J* = 7.8, 6.2 Hz, 3H), 3.42-3.35 (m, 2H), 2.97 (s, 3H), 2.67 (t, *J* = 7.8 Hz, 2H), 2.38 (s, 3H), 2.01-1.87 (m, 2H) ppm;

**<sup>13</sup>C NMR** (101 MHz, CDCl<sub>3</sub>) δ 149.4, 141.8, 137.9, 129.19, 129.16, 128.3, 126.6, 125.4, 116.0, 112.3, 52.3, 38.3, 33.3, 28.2, 21.4 ppm.

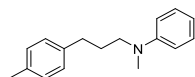

**9ea-p.**<sup>6</sup> Yellow oil (108 mg, 90% yield) was obtained after column chromatography (petroleum ether / ethyl acetate = 400:1).

**<sup>1</sup>H NMR** (400 MHz, CDCl<sub>3</sub>) δ 7.29-7.21 (m, 2H), 7.13 (d, *J* = 7.7 Hz, 4H), 6.75 -6.66 (m, 3H), 3.37 (q, *J* = 7.9 Hz, 2H), 2.96 (s, 3H), 2.65 (q, *J* = 7.9 Hz, 2H), 2.37 (s, 3H), 1.98-1.86 (m, 2H) ppm;

**<sup>13</sup>C NMR** (101 MHz, CDCl<sub>3</sub>) δ 149.3, 138.7, 135.3, 129.13, 129.05, 128.2, 116.0, 112.2, 52.3, 38.3, 32.9, 28.3, 21.0 ppm.

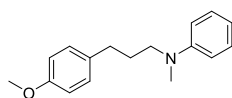



**9fa.**<sup>7</sup> Yellow oil (111 mg, 87% yield) was obtained after column chromatography (petroleum ether / ethyl acetate = 100:1).

**<sup>1</sup>H NMR** (400 MHz, CDCl<sub>3</sub>) δ 7.31-7.23 (m, 2H), 7.20-7.14 (m, 2H), 6.93-6.87 (m, 2H), 6.77-6.71 (m, 3H), 3.86 (s, 3H), 3.39 (t, *J* = 7.5 Hz, 2H), 2.98 (s, 3H), 2.67 (t, *J* = 7.7 Hz, 2H), 2.00-1.90 (m, 2H) ppm;  
**<sup>13</sup>C NMR** (101 MHz, CDCl<sub>3</sub>) δ 157.9, 149.4, 133.9, 129.3, 129.2, 116.0, 113.8, 112.3, 55.3, 52.2, 38.3, 32.5, 28.4 ppm.

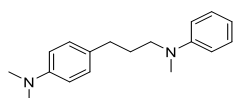

**9ga.** Yellow oil (114 mg, 85% yield) was obtained after column chromatography (petroleum ether / ethyl acetate = 40:1).

**<sup>1</sup>H NMR** (400 MHz, CDCl<sub>3</sub>) δ 7.30-7.22 (m, 2H), 7.15-7.08 (m, 2H), 6.78-6.69 (m, 5H), 3.41-3.33 (m, 2H), 2.96 (s, 9H), 2.62 (t, *J* = 7.7 Hz, 2H), 1.97-1.86 (m, 2H) ppm;  
**<sup>13</sup>C NMR** δ 149.4, 149.1, 130.0, 129.1, 128.9, 115.9, 113.1, 112.2, 52.3, 41.0, 38.3, 32.3, 28.4 ppm;  
**HR-MS** (ESI/TOF) *m/z*: Calcd. for C<sub>18</sub>H<sub>25</sub>N<sub>2</sub> [M+H]<sup>+</sup> 269.2012; Found: 269.1993.

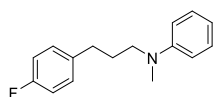

**9ha.**<sup>6</sup> Yellow oil (105 mg, 87% yield) was obtained after column chromatography (petroleum ether / ethyl acetate = 400:1).

**<sup>1</sup>H NMR** (400 MHz, CDCl<sub>3</sub>) δ 7.30-7.22 (m, 2H), 7.18 (t, *J* = 4.4 Hz, 2H), 7.06-6.97 (m, 2H), 6.73 (t, *J* = 7.1 Hz, 3H), 3.41-3.33 (m, 2H), 2.97 (s, 3H), 2.67 (t, *J* = 7.7 Hz, 2H), 1.99-1.87 (m, 2H) ppm;  
**<sup>13</sup>C NMR** (101 MHz, CDCl<sub>3</sub>) δ 162.5, 160.1, 149.3, 137.4, 129.7, 129.6, 129.2, 116.1, 115.2, 115.0, 112.2, 52.1, 38.3, 32.5, 28.3 ppm;  
**<sup>19</sup>F NMR** (376 MHz, CDCl<sub>3</sub>) δ -117.58 ppm.

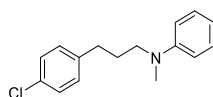

**9ia.**<sup>8</sup> Yellow oil (110 mg, 85% yield) was obtained after column chromatography (petroleum ether / ethyl acetate = 400:1).

**<sup>1</sup>H NMR** (400 MHz, CDCl<sub>3</sub>) δ 7.35-7.23 (m, 4H), 7.18 (d, *J* = 8.4 Hz, 2H), 6.75 (t, *J* = 7.6 Hz, 3H), 3.39 (t, *J* = 7.4 Hz, 2H), 2.98 (s, 3H), 2.69 (t, *J* = 7.8 Hz, 2H), 2.01-1.89 (m, 2H) ppm;  
**<sup>13</sup>C NMR** (101 MHz, CDCl<sub>3</sub>) δ 149.3, 140.3, 131.6, 129.7, 129.2, 128.5, 116.2, 112.3, 52.2, 38.4, 32.7, 28.2 ppm.

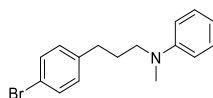

**9ja.**<sup>8</sup> Yellow oil (134 mg, 88% yield) was obtained after column chromatography (petroleum ether / ethyl acetate = 400:1).

**<sup>1</sup>H NMR** (400 MHz, CDCl<sub>3</sub>) δ 7.48-7.41 (m, 2H), 7.32-7.22 (m, 2H), 7.14-7.07 (m, 2H), 6.78-6.67 (m, 3H), 3.41-3.33 (m, 2H), 2.96 (s, 3H), 2.65 (t, *J* = 7.7 Hz, 2H), 1.98-1.88 (m, 2H) ppm;

**<sup>13</sup>C NMR** (101 MHz, CDCl<sub>3</sub>) δ 149.3, 140.8, 131.4, 130.1, 129.2, 119.6, 116.2, 112.3, 52.1, 38.3, 32.8, 28.1 ppm.

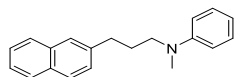

**9ka.** Yellow oil (120 mg, 84% yield) was obtained after column chromatography (petroleum ether / ethyl acetate = 400:1).

**<sup>1</sup>H NMR** (400 MHz, CDCl<sub>3</sub>) δ 7.94-7.78 (m, 3H), 7.70 (d, *J* = 4.4 Hz, 1H), 7.52 (q, *J* = 7.0 Hz, 2H), 7.44-7.36 (m, 1H), 7.35-7.24 (m, 2H), 6.76 (dd, *J* = 7.7, 5.1 Hz, 3H), 3.46 (t, *J* = 7.4 Hz, 2H), 3.00 (d, *J* = 3.6 Hz, 3H), 2.90 (t, *J* = 7.5 Hz, 2H), 2.15-2.02 (m, 2H) ppm;

**<sup>13</sup>C NMR** (101 MHz, CDCl<sub>3</sub>) δ 149.3, 139.3, 133.6, 132.1, 129.2, 128.0, 127.6, 127.4, 127.2, 126.4, 126.0, 125.2, 116.1, 112.3, 52.3, 38.3, 33.5, 28.0 ppm;

**HR-MS** (ESI/TOF) *m/z*: Calcd. for C<sub>20</sub>H<sub>22</sub>N [M+H]<sup>+</sup> 276.1747; Found: 276.1711.

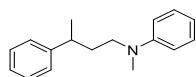

**9la.**<sup>9</sup> Yellow oil (118 mg, 99% yield) was obtained after column chromatography (petroleum ether / ethyl acetate = 400:1).

**<sup>1</sup>H NMR** (400 MHz, CDCl<sub>3</sub>) δ 7.41 (t, *J* = 7.2 Hz, 2H), 7.34-7.24 (m, 5H), 6.75 (dd, *J* = 6.5, 2.8 Hz, 1H), 6.71-6.64 (m, 2H), 3.38-3.17 (m, 2H), 2.94 (s, 3H), 2.86-2.74 (m, 1H), 2.00-1.90 (m, 2H), 1.38 (d, *J* = 3.3 Hz, 3H) ppm;

**<sup>13</sup>C NMR** (101 MHz, CDCl<sub>3</sub>) δ 149.4, 147.1, 129.4, 128.8, 127.2, 126.4, 116.2, 112.5, 51.3, 38.4, 38.2, 34.6, 23.1 ppm.

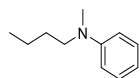

**9ma-2.**<sup>10</sup> Yellow oil (65 mg, 80% yield) was obtained after column chromatography (petroleum ether / ethyl acetate = 400:1).

**<sup>1</sup>H NMR** (400 MHz, CDCl<sub>3</sub>) δ 7.49 – 7.40 (m, 2H), 6.96 – 6.86 (m, 3H), 3.56 – 3.47 (m, 2H), 3.12 (s, 3H), 1.85 – 1.72 (m, 2H), 1.65 – 1.52 (m, 2H), 1.18 (t, *J* = 7.3 Hz, 3H) ppm;

**<sup>13</sup>C NMR** (101 MHz, CDCl<sub>3</sub>) δ 149.6, 129.3, 116.0, 112.3, 52.7, 38.4, 29.1, 20.6, 14.2.

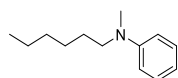

**9ma-4.**<sup>11</sup> Yellow oil (81 mg, 85% yield) was obtained after column chromatography (petroleum ether / ethyl acetate = 400:1).

**<sup>1</sup>H NMR** (400 MHz, CDCl<sub>3</sub>) δ 7.33-7.25 (m, 2H), 6.79-6.71 (m, 3H), 3.40-3.34 (m, 2H), 2.99 (s, 3H), 1.64 (t, *J* = 7.4 Hz, 2H), 1.39 (s, 6H), 1.00-0.95 (m, 3H) ppm;  
**<sup>13</sup>C NMR** (101 MHz, CDCl<sub>3</sub>) δ 149.4, 129.2, 115.9, 112.2, 52.9, 38.3, 31.9, 27.0, 26.7, 22.8, 14.1 ppm.

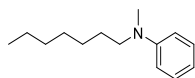

**9ma-5.**<sup>12</sup> Yellow oil (96 mg, 93% yield) was obtained after column chromatography (petroleum ether / ethyl acetate = 400:1).

**<sup>1</sup>H NMR** (400 MHz, CDCl<sub>3</sub>) δ 7.34-7.27 (m, 2H), 6.82-6.73 (m, 3H), 3.41-3.34 (m, 2H), 3.00 (s, 3H), 1.66 (t, *J* = 7.8 Hz, 2H), 1.45-1.33 (m, 8H), 1.03-0.94 (m, 3H) ppm;  
**<sup>13</sup>C NMR** (101 MHz, CDCl<sub>3</sub>) δ 149.4, 129.2, 115.9, 112.2, 52.9, 38.4, 32.0, 29.4, 27.3, 26.8, 22.8, 14.2 ppm.

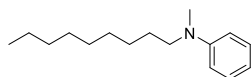

**9ma-7.**<sup>12</sup> Yellow oil (107 mg, 92% yield) was obtained after column chromatography (petroleum ether / ethyl acetate = 400:1).

**<sup>1</sup>H NMR** (400 MHz, CDCl<sub>3</sub>) δ 7.36-7.30 (m, 2H), 6.83-6.76 (m, 3H), 3.44-3.36 (m, 2H), 3.02 (s, 3H), 1.68 (t, *J* = 7.5 Hz, 2H), 1.45-1.38 (m, 12H), 1.03-0.99 (m, 3H) ppm;  
**<sup>13</sup>C NMR** (101 MHz, CDCl<sub>3</sub>) δ 149.5, 129.2, 115.9, 112.2, 52.9, 38.3, 32.0, 29.74, 29.69, 29.4, 27.3, 26.8, 22.8, 14.2 ppm.

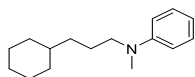

**9na.**<sup>13</sup> Yellow oil (99 mg, 86% yield) was obtained after column chromatography (petroleum ether / ethyl acetate = 400:1).

**<sup>1</sup>H NMR** (400 MHz, CDCl<sub>3</sub>) δ 7.34-7.26 (m, 2H), 6.77 (dd, *J* = 8.6, 2.9 Hz, 3H), 3.35 (dd, *J* = 8.9, 6.5 Hz, 2H), 2.99 (d, *J* = 2.1 Hz, 3H), 1.84-1.73 (m, 5H), 1.65 (d, *J* = 7.7 Hz, 2H), 1.36 (s, 2H), 1.31-1.26 (m, 4H), 0.99-0.92 (m, 2H) ppm ;  
**<sup>13</sup>C NMR** (101 MHz, CDCl<sub>3</sub>) δ 149.4, 129.2, 115.8, 112.1, 53.2, 38.3, 37.7, 34.9, 33.5, 26.7, 26.5, 24.0 ppm.

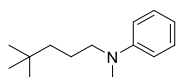

**9oa.**<sup>14</sup> White oil (104 mg, 98% yield) was obtained after column chromatography (petroleum ether / ethyl acetate = 400:1).

**<sup>1</sup>H NMR** (400 MHz, CDCl<sub>3</sub>) δ 7.38 (t, *J* = 8.1 Hz, 2H), 6.84 (dd, *J* = 8.8, 2.2 Hz, 3H), 3.41 (t, *J* = 7.5 Hz, 2H), 3.07 (s, 3H), 1.76-1.65 (m, 2H), 1.38-1.28 (m, 2H), 1.05 (s, 9H) ppm;  
**<sup>13</sup>C NMR** (101 MHz, CDCl<sub>3</sub>) δ 149.5, 129.3, 116.0, 112.2, 53.8, 41.5, 38.3, 30.4, 29.5, 22.0 ppm.

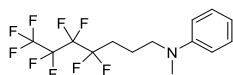

**9pa.**<sup>14</sup> Yellow oil (185 mg, 92% yield) was obtained after column chromatography (petroleum ether / ethyl acetate = 400:1).

**<sup>1</sup>H NMR** (400 MHz, CDCl<sub>3</sub>) δ 7.32 (dd, *J* = 8.7, 7.4 Hz, 2H), 6.79 (d, *J* = 8.8 Hz, 3H), 3.46 (t, *J* = 7.3 Hz, 2H), 3.00 (s, 3H), 2.25-2.10 (m, 2H), 2.02-1.92 (m, 2H) ppm;

**<sup>13</sup>C NMR** (101 MHz, CDCl<sub>3</sub>) δ 149.2, 129.3, 116.9, 112.6, 52.0, 38.2, 28.6, 28.4, 28.1, 18.0 ppm.

**<sup>19</sup>F NMR** (376 MHz, CDCl<sub>3</sub>) δ -81.14, -114.22, -124.49, -126.07 ppm.

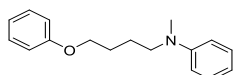

**9qa.**<sup>14</sup> Yellow oil (73 mg, 57% yield) was obtained after column chromatography (petroleum ether / ethyl acetate = 200:1).

**<sup>1</sup>H NMR** (400 MHz, CDCl<sub>3</sub>) δ 7.35-7.25 (m, 4H), 6.96 (dd, *J* = 22.7, 7.7 Hz, 3H), 6.75 (dd, *J* = 16.7, 7.9 Hz, 3H), 4.01 (t, *J* = 5.8 Hz, 2H), 3.43 (t, *J* = 7.0 Hz, 2H), 2.98 (s, 3H), 1.89-1.76 (m, 4H) ppm;

**<sup>13</sup>C NMR** (101 MHz, CDCl<sub>3</sub>) δ 159.0, 129.5, 129.3, 120.7, 116.3, 114.5, 112.4, 67.6, 52.7, 38.5, 29.8, 27.0, 23.6 ppm.

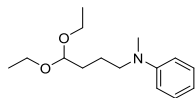

**9ra.** Yellow oil (67 mg, 53% yield) was obtained after column chromatography (petroleum ether / ethyl acetate = 200:1).

**<sup>1</sup>H NMR** (400 MHz, CDCl<sub>3</sub>) δ 7.24 (dd, *J* = 15.5, 6.7 Hz, 2H), 6.69 (dd, *J* = 14.9, 7.7 Hz, 3H), 4.51 (s, 1H), 3.65 (dd, *J* = 9.4, 7.0 Hz, 2H), 3.55-3.44 (m, 2H), 3.38-3.30 (m, 2H), 2.93 (s, 3H), 1.66 (d, *J* = 2.8 Hz, 4H), 1.21 (t, *J* = 7.0 Hz, 6H) ppm;

**<sup>13</sup>C NMR** (101 MHz, CDCl<sub>3</sub>) δ 149.2, 129.1, 115.9, 112.1, 102.8, 61.1, 52.5, 38.2, 31.1, 22.0, 15.3 ppm;

**HR-MS** (ESI/TOF) *m/z*: Calcd. for C<sub>15</sub>H<sub>26</sub>NO<sub>2</sub> [M+H]<sup>+</sup> 252.1958; Found: 252.1960.

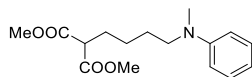

**9sa.** Yellow oil (103 mg, 71% yield) was obtained after column chromatography (petroleum ether / ethyl acetate = 10:1).

**<sup>1</sup>H NMR** (400 MHz, CDCl<sub>3</sub>) δ 7.24 (dd, *J* = 8.7, 7.2 Hz, 2H), 6.73-6.67 (m, 3H), 3.75 (s, 6H), 3.39 (t, *J* = 7.5 Hz, 1H), 3.35-3.29 (m, 2H), 2.93 (s, 3H), 1.96 (q, *J* = 7.6 Hz, 2H), 1.67-1.58 (m, 2H), 1.41-1.33 (m, 2H) ppm;

**<sup>13</sup>C NMR** (101 MHz, CDCl<sub>3</sub>) δ 169.8, 149.2, 129.1, 116.0, 112.1, 52.5, 52.4, 51.6, 38.3, 28.7, 26.3, 24.9 ppm;

**HR-MS** (ESI/TOF) *m/z*: Calcd. for C<sub>16</sub>H<sub>24</sub>NO<sub>4</sub> [M+H]<sup>+</sup> 294.1700; Found: 294.1691.

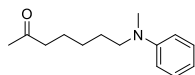

**9ta.** Yellow oil (70 mg, 63% yield) was obtained after column chromatography (petroleum ether / ethyl acetate = 50:1).

**<sup>1</sup>H NMR** (400 MHz, CDCl<sub>3</sub>) δ 7.31-7.23 (m, 2H), 6.77 -6.69 (m, 3H), 3.38-3.31 (m, 2H), 2.96 (s, 3H), 2.47 (t, *J* = 7.3 Hz, 2H), 2.17 (s, 3H), 1.68-1.61 (m, 4H), 1.40-1.32 (m, 2H) ppm;

**<sup>13</sup>C NMR** (101 MHz, CDCl<sub>3</sub>) δ 208.9, 149.3, 129.2, 116.0, 112.2, 52.6, 43.6, 38.3, 29.9, 26.8, 26.6, 23.7 ppm;

**HR-MS** (ESI/TOF) *m/z*: Calcd. for C<sub>14</sub>H<sub>22</sub>NO [M+H]<sup>+</sup> 220.1696; Found: 220.1689.

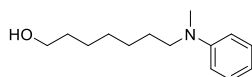

**9ua.** White oil (91 mg, 82% yield) was obtained after column chromatography (petroleum ether / ethyl acetate = 5:1).

**<sup>1</sup>H NMR** (400 MHz, CDCl<sub>3</sub>) δ 7.28-7.20 (m, 2H), 6.76-6.64 (m, 3H), 3.66 (t, *J* = 6.6 Hz, 2H), 3.36-3.29 (m, 2H), 2.94 (s, 3H), 1.64-1.57 (m, 4H), 1.46-1.34 (m, 6H), 1.27 (s, 1H) ppm;

**<sup>13</sup>C NMR** (101 MHz, CDCl<sub>3</sub>) δ 149.4, 129.1, 115.8, 112.1, 63.0, 52.8, 38.3, 32.7, 29.3, 27.2, 26.6, 25.8 ppm

**HR-MS** (ESI/TOF) *m/z*: Calcd. for C<sub>14</sub>H<sub>24</sub>NO [M+H]<sup>+</sup> 222.1852; Found: 222.1846.

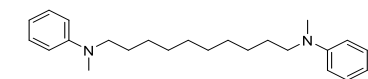

**9va.**<sup>14</sup> Yellow oil (126 mg, 72% yield) was obtained after column chromatography (petroleum ether / ethyl acetate = 400:1).

**<sup>1</sup>H NMR** (400 MHz, CDCl<sub>3</sub>) δ 7.27-7.21 (m, 4H), 6.76-6.65 (m, 6H), 3.31 (t, *J* = 7.6 Hz, 4H), 2.94 (s, 6H), 1.58 (t, *J* = 7.4 Hz, 4H), 1.31 (d, *J* = 5.4 Hz, 12H) ppm;

**<sup>13</sup>C NMR** (101 MHz, CDCl<sub>3</sub>) δ 149.4, 129.1, 115.8, 112.1, 52.8, 38.3, 29.61, 29.56, 27.2, 26.7 ppm.

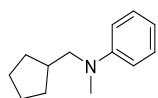

**9wa-5.**<sup>15</sup> Yellow oil (83 mg, 88% yield) was obtained after column chromatography (petroleum ether / ethyl acetate = 400:1).

**<sup>1</sup>H NMR** (400 MHz, CDCl<sub>3</sub>) δ 7.32-7.24 (m, 2H), 6.81-6.69 (m, 3H), 3.31 (d, *J* = 7.3 Hz, 2H), 3.02 (s, 3H), 2.29-2.40 (m, 1H), 1.86-1.56 (m, 6H), 1.36-1.22 (m, 2H) ppm;

**<sup>13</sup>C NMR** (101 MHz, CDCl<sub>3</sub>) δ 149.6, 129.1, 115.7, 112.0, 57.8, 39.05, 38.97, 30.9, 25.1 ppm.

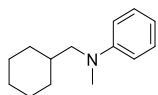

**9wa-6.**<sup>16</sup> Yellow oil (77 mg, 76% yield) was obtained after column chromatography (petroleum ether / ethyl acetate = 400:1).

**<sup>1</sup>H NMR** (400 MHz, CDCl<sub>3</sub>) δ 7.29 (t, *J* = 7.9 Hz, 2H), 6.78-6.69 (m, 3H), 3.19 (d, *J* = 6.7 Hz, 2H), 3.02 (d, *J* = 3.1 Hz, 3H), 1.83-1.75 (m, 5H), 1.40-1.23 (m, 5H), 1.01 (d, *J* = 12.0 Hz, 1H) ppm;

**<sup>13</sup>C NMR** (101 MHz, CDCl<sub>3</sub>) δ 149.6, 129.1, 115.4, 111.6, 59.7, 39.6, 36.9, 31.3, 26.6, 26.1 ppm.

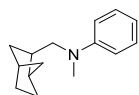

**9xa**<sup>14</sup>. Yellow oil (89 mg, 83% yield) was obtained after column chromatography (petroleum ether / ethyl acetate = 400:1).

**<sup>1</sup>H NMR** (400 MHz, CDCl<sub>3</sub>) δ 7.44-7.33 (m, 2H), 6.84 (dd, *J* = 14.9, 7.7 Hz, 3H), 3.29-3.15 (m, 2H), 3.09 (s, 3H), 2.43-2.37 (m, 1H), 2.27 (d, *J* = 3.1 Hz, 1H), 2.08-1.99 (m, 1H), 1.69-1.61 (m, 2H), 1.58-1.51 (m, 2H), 1.33-1.25 (m, 3H), 1.24-1.17 (m, 1H) ppm;

**<sup>13</sup>C NMR** (101 MHz, CDCl<sub>3</sub>) δ 149.9, 129.2, 115.9, 112.1, 58.1, 41.0, 39.3, 39.1, 36.7, 35.5, 35.3, 30.0, 29.1 ppm.

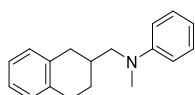

**9ya.** Yellow oil (78 mg, 62% yield) was obtained after column chromatography (petroleum ether / ethyl acetate = 400:1).

**<sup>1</sup>H NMR** (400 MHz, CDCl<sub>3</sub>) δ 7.32-7.25 (m, 2H), 7.13 (q, *J* = 5.9 Hz, 4H), 6.75 (dd, *J* = 17.5, 7.8 Hz, 3H), 3.43-3.28 (m, 2H), 3.06 (s, 3H), 2.96-2.81 (m, 3H), 2.55 (dd, *J* = 16.3, 10.7 Hz, 1H), 2.37-2.22 (m, 1H), 2.11-2.01 (m, 1H), 1.57-1.44 (m, 1H) ppm;

**<sup>13</sup>C NMR** (101 MHz, CDCl<sub>3</sub>) δ 149.6, 136.6, 136.0, 129.2, 129.1, 128.9, 125.7, 125.6, 115.9, 111.9, 58.8, 39.6, 34.0, 33.6, 28.9, 27.5 ppm;

**HR-MS** (ESI/TOF) *m/z*: Calcd. for C<sub>18</sub>H<sub>22</sub>N [M+H]<sup>+</sup> 252.1747; Found: 252.1738.

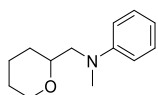

**9za.** Yellow oil (58 mg, 57% yield) was obtained after column chromatography (petroleum ether / ethyl acetate = 100:1).

**<sup>1</sup>H NMR** (400 MHz, CDCl<sub>3</sub>) δ 7.27-7.21 (m, 2H), 6.71 (d, *J* = 8.6 Hz, 3H), 5.29 (d, *J* = 3.5 Hz, 1H), 3.70-3.60 (m, 2H), 3.32 (t, *J* = 7.7 Hz, 2H), 2.92 (d, *J* = 3.1 Hz, 3H), 1.60 (d, *J* = 7.1 Hz, 6H) ppm;

**<sup>13</sup>C NMR** (101 MHz, CDCl<sub>3</sub>) δ 149.3, 129.2, 116.0, 112.2, 62.8, 52.8, 38.3, 32.6, 29.7, 26.5, 23.4 ppm.

**HR-MS** (ESI/TOF) *m/z*: Calcd. for C<sub>13</sub>H<sub>20</sub>NO [M+H]<sup>+</sup> 206.1539; Found: 206.1528.

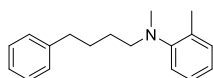

**9ab.** Yellow oil (114 mg, 90% yield) was obtained after column chromatography (petroleum ether / ethyl acetate = 400:1).

**<sup>1</sup>H NMR** (400 MHz, CDCl<sub>3</sub>) δ 7.32 (t, *J* = 7.4 Hz, 2H), 7.22 (t, *J* = 7.6 Hz, 5H), 7.09 (d, *J* = 7.8 Hz, 1H), 7.01 (t, *J* = 7.3 Hz, 1H), 2.94 (t, *J* = 7.1 Hz, 2H), 2.69 (s, 3H), 2.65 (d, *J* = 7.8 Hz, 2H), 2.36 (s, 3H), 1.74-1.61 (m, 4H) ppm;

**<sup>13</sup>C NMR** (101 MHz, CDCl<sub>3</sub>) δ 152.4, 142.6, 133.2, 131.0, 128.4, 128.3, 126.3, 125.6, 122.8, 120.0, 56.0, 41.8, 35.8, 29.0, 27.3, 18.3 ppm;

**HR-MS** (ESI/TOF) *m/z*: Calcd. for C<sub>18</sub>H<sub>24</sub>N [M+H]<sup>+</sup> 254.1903; Found: 254.1894.

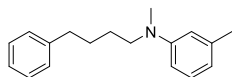

**9ac**<sup>16</sup>. Yellow oil (114 mg, 93% yield) was obtained after column chromatography (petroleum ether / ethyl acetate = 400:1).

**<sup>1</sup>H NMR** (400 MHz, CDCl<sub>3</sub>) δ 7.33-7.25 (m, 2H), 7.20 (dd, *J* = 7.6, 5.6 Hz, 3H), 7.15-7.09 (m, 1H), 6.52 (d, *J* = 7.3 Hz, 3H), 3.32 (t, *J* = 6.8 Hz, 2H), 2.91 (s, 3H), 2.66 (t, *J* = 7.1 Hz, 2H), 2.32 (s, 3H), 1.71-1.61 (m, 4H) ppm;

**<sup>13</sup>C NMR** (101 MHz, CDCl<sub>3</sub>) δ 149.5, 142.4, 138.8, 129.1, 128.44, 128.37, 125.8, 117.0, 112.9, 109.5, 52.7, 38.4, 35.9, 29.1, 26.6, 22.0 ppm.

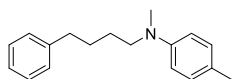

**9ad**<sup>16</sup>. Yellow oil (112 mg, 91% yield) was obtained after column chromatography (petroleum ether / ethyl acetate = 400:1).

**<sup>1</sup>H NMR** (400 MHz, CDCl<sub>3</sub>) δ 7.40-7.33 (m, 2H), 7.30-7.24 (m, 3H), 7.12 (d, *J* = 8.3 Hz, 2H), 6.75-6.68 (m, 2H), 3.37 (t, *J* = 6.9 Hz, 2H), 2.95 (s, 3H), 2.72 (t, *J* = 7.1 Hz, 2H), 2.34 (s, 3H), 1.72 (dd, *J* = 4.4, 2.3 Hz, 4H) ppm;

**<sup>13</sup>C NMR** (101 MHz, CDCl<sub>3</sub>) δ 147.5, 142.4, 129.7, 128.5, 128.4, 125.8, 125.3, 112.7, 53.1, 38.6, 35.9, 29.2, 26.4, 20.3 ppm.

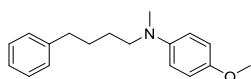

**9ae**. Yellow oil (123 mg, 92% yield) was obtained after column chromatography (petroleum ether / ethyl acetate = 400:1).

**<sup>1</sup>H NMR** (400 MHz, CDCl<sub>3</sub>) δ 7.35 (dd, *J* = 8.5, 6.5 Hz, 2H), 7.25 (dd, *J* = 8.0, 6.3 Hz, 3H), 6.93-6.87 (m, 2H), 6.79-6.73 (m, 2H), 3.82 (s, 3H), 3.30 (t, *J* = 7.0 Hz, 2H), 2.90 (s, 3H), 2.70 (t, *J* = 7.3 Hz, 2H), 1.74-1.62 (m, 4H) ppm;

**<sup>13</sup>C NMR** (101 MHz, CDCl<sub>3</sub>) δ 151.5, 144.5, 142.4, 128.4, 128.3, 125.8, 114.8, 114.5, 55.8, 53.9, 39.0, 35.9, 29.1, 26.4 ppm;

**HR-MS** (ESI/TOF) *m/z*: Calcd. for C<sub>18</sub>H<sub>24</sub>NO [M+H]<sup>+</sup> 270.1852; Found: 270.1843.

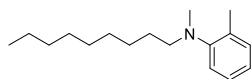

**9mb.** Yellow oil (102 mg, 83% yield) was obtained after column chromatography (petroleum ether / ethyl acetate = 400:1).

**<sup>1</sup>H NMR** (400 MHz, CDCl<sub>3</sub>) δ 7.25-7.17 (m, 2H), 7.10 (dd, *J* = 7.9, 1.3 Hz, 1H), 7.01 (t, *J* = 7.1 Hz, 1H), 2.94-2.87 (m, 2H), 2.71 (s, 3H), 2.37 (s, 3H), 1.62-1.52 (m, 2H), 1.37-1.31 (m, 12H), 0.94 (t, *J* = 6.7 Hz, 3H) ppm;

**<sup>13</sup>C NMR** (101 MHz, CDCl<sub>3</sub>) δ 152.5, 133.1, 131.0, 126.2, 122.6, 119.9, 56.4, 41.7, 31.9, 29.65, 29.58, 29.3, 27.7, 27.2, 22.7, 18.3, 14.1 ppm.

**HR-MS** (ESI/TOF) *m/z*: Calcd. for C<sub>17</sub>H<sub>30</sub>N [M+H]<sup>+</sup> 248.2373; Found: 248.2365.

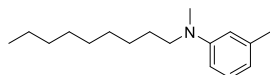

**9mc.** Yellow oil (113 mg, 91% yield) was obtained after column chromatography (petroleum ether / ethyl acetate = 400:1).

**<sup>1</sup>H NMR** (400 MHz, CDCl<sub>3</sub>) δ 7.19-7.12 (m, 1H), 6.55 (d, *J* = 6.2 Hz, 3H), 3.32 (t, *J* = 7.6 Hz, 2H), 2.95 (s, 3H), 2.36 (s, 3H), 1.61 (s, 2H), 1.34 (d, *J* = 13.0 Hz, 12H), 0.93 (t, *J* = 6.7 Hz, 3H) ppm;

**<sup>13</sup>C NMR** (101 MHz, CDCl<sub>3</sub>) δ 149.5, 138.7, 129.0, 116.8, 112.9, 109.4, 52.9, 38.3, 31.9, 29.65, 29.59, 29.3, 27.2, 26.7, 22.7, 22.0, 14.1 ppm;

**HR-MS** (ESI/TOF) *m/z*: Calcd. for C<sub>17</sub>H<sub>30</sub>N [M+H]<sup>+</sup> 248.2373; Found: 248.2365.

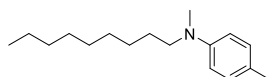

**9md.** Yellow oil (112 mg, 91% yield) was obtained after column chromatography (petroleum ether / ethyl acetate = 400:1).

**<sup>1</sup>H NMR** (400 MHz, CDCl<sub>3</sub>) δ 6.85 (d, *J* = 9.0 Hz, 2H), 6.71 (d, *J* = 8.8 Hz, 2H), 3.77 (s, 3H), 3.27-3.17 (m, 2H), 2.86 (s, 3H), 1.55 (t, *J* = 7.4 Hz, 2H), 1.30 (d, *J* = 10.2 Hz, 12H), 0.90 (t, *J* = 6.6 Hz, 3H) ppm;

**<sup>13</sup>C NMR** (101 MHz, CDCl<sub>3</sub>) δ 151.4, 144.6, 114.7, 114.4, 55.8, 54.0, 38.9, 31.9, 29.60, 29.56, 29.3, 27.2, 26.5, 22.7, 14.1 ppm.

**HR-MS** (ESI/TOF) *m/z*: Calcd. for C<sub>17</sub>H<sub>30</sub>N [M+H]<sup>+</sup> 248.2373; Found: 248.2365.

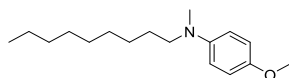

**9me.**<sup>14</sup> Yellow oil (119 mg, 91% yield) was obtained after column chromatography (petroleum ether / ethyl acetate = 100:1).

**<sup>1</sup>H NMR** (400 MHz, CDCl<sub>3</sub>) δ 6.87-6.80 (m, 2H), 6.70 (d, *J* = 9.1 Hz, 2H), 3.77 (s, 3H), 3.26-3.17 (m, 2H), 2.86 (s, 3H), 1.54 (t, *J* = 7.4 Hz, 2H), 1.29 (d, *J* = 9.9 Hz, 12H), 0.89 (t, *J* = 6.6 Hz, 3H) ppm;

**<sup>13</sup>C NMR** (101 MHz, CDCl<sub>3</sub>) δ 151.4, 144.6, 114.7, 114.4, 55.8, 54.0, 38.9, 31.9, 29.6, 29.5, 29.3, 27.2, 26.5, 22.6, 14.1 ppm.

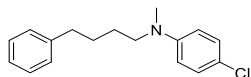



**9af.** Yellow oil (120 mg, 88% yield) was obtained after column chromatography (petroleum ether / ethyl acetate = 400:1).

**<sup>1</sup>H NMR** (400 MHz, CDCl<sub>3</sub>) δ 7.35 (t, *J* = 7.4 Hz, 2H), 7.29-7.18 (m, 5H), 6.67-6.61 (m, 2H), 3.34 (t, *J* = 6.9 Hz, 2H), 2.93 (s, 3H), 2.70 (t, *J* = 7.1 Hz, 2H), 1.75-1.62 (m, 4H) ppm;

**<sup>13</sup>C NMR** (101 MHz, CDCl<sub>3</sub>) δ 147.9, 142.2, 128.9, 128.41, 128.38, 125.9, 120.6, 113.2, 52.7, 38.5, 35.8, 29.0, 26.3 ppm;

**HR-MS** (ESI/TOF) *m/z*: Calcd. for C<sub>17</sub>H<sub>21</sub>ClN [M+H]<sup>+</sup> 274.1357; Found: 274.1349.

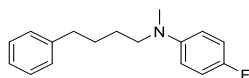

**9ag.** Yellow oil (118 mg, 92% yield) was obtained after column chromatography (petroleum ether / ethyl acetate = 400:1).

**<sup>1</sup>H NMR** (400 MHz, CDCl<sub>3</sub>) δ 7.39-7.32 (m, 2H), 7.26 (dd, *J* = 9.1, 7.2 Hz, 3H), 7.04-6.95 (m, 2H), 6.72-6.64 (m, 2H), 3.34 (t, *J* = 6.9 Hz, 2H), 2.93 (d, *J* = 1.5 Hz, 3H), 2.72 (t, *J* = 7.3 Hz, 2H), 1.78-1.64 (m, 4H) ppm;

**<sup>13</sup>C NMR** (101 MHz, CDCl<sub>3</sub>) δ 156.4, 154.1, 146.3, 142.3, 128.43, 128.39, 125.9, 115.6, 115.4, 113.53, 113.46, 53.5, 38.8, 35.8, 29.0, 26.3 ppm;

**<sup>19</sup>F NMR** (376 MHz, CDCl<sub>3</sub>) δ -129.81 ppm;

**HR-MS** (ESI/TOF) *m/z*: Calcd. for C<sub>17</sub>H<sub>21</sub>FN [M+H]<sup>+</sup> 258.1653; Found: 258.1644.

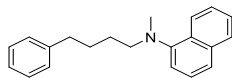

**9ah.** Yellow oil (126 mg, 87% yield) was obtained after column chromatography (petroleum ether / ethyl acetate = 200:1).

**<sup>1</sup>H NMR** (400 MHz, CDCl<sub>3</sub>) δ 8.40-8.33 (m, 1H), 7.96-7.87 (m, 1H), 7.63 (d, *J* = 8.1 Hz, 1H), 7.57 (dd, *J* = 6.5, 3.7 Hz, 2H), 7.49 (t, *J* = 7.8 Hz, 1H), 7.37 (t, *J* = 7.4 Hz, 2H), 7.30-7.17 (m, 4H), 3.21 (t, *J* = 6.7 Hz, 2H), 2.94 (s, 3H), 2.76-2.67 (m, 2H), 1.80 (t, *J* = 3.9 Hz, 4H) ppm;

**<sup>13</sup>C NMR** (101 MHz, CDCl<sub>3</sub>) δ 150.6, 142.6, 134.9, 129.7, 128.5, 128.3, 125.77, 125.76, 125.74, 125.2, 124.1, 123.1, 115.6, 56.9, 42.6, 35.8, 29.8, 29.1, 27.2 ppm;

**HR-MS** (ESI/TOF) *m/z*: Calcd. for C<sub>21</sub>H<sub>24</sub>N [M+H]<sup>+</sup> 290.1903; Found: 290.1894.

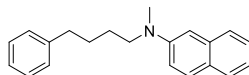

**9ai.** Yellow oil (128 mg, 89% yield) was obtained after column chromatography (petroleum ether / ethyl acetate = 200:1).

**<sup>1</sup>H NMR** (400 MHz, CDCl<sub>3</sub>) δ 7.71 (dd, *J* = 18.0, 8.5 Hz, 3H), 7.41 (t, *J* = 7.5 Hz, 1H), 7.34 (dd, *J* = 8.4, 6.4 Hz, 2H), 7.28-7.20 (m, 4H), 7.17 (dd, *J* = 9.1, 2.6 Hz, 1H), 6.92 (d, *J* = 2.6 Hz, 1H), 3.52-3.43 (m, 2H), 3.05 (s, 3H), 2.70 (d, *J* = 7.2 Hz, 2H), 1.77-1.67 (m, 4H) ppm;

**<sup>13</sup>C NMR** (101 MHz, CDCl<sub>3</sub>) δ 147.4, 142.3, 135.2, 128.7, 128.40, 128.35, 127.4, 126.5, 126.2, 126.0, 125.8, 121.8, 116.1, 105.9, 52.9, 38.6, 35.8, 29.0, 26.6 ppm;

**HR-MS** (ESI/TOF) *m/z*: Calcd. for C<sub>21</sub>H<sub>24</sub>N [M+H]<sup>+</sup> 290.1903; Found: 290.1892.

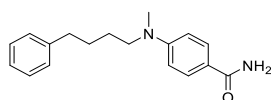

**9aj.** White solid (133 mg, 94% yield) was obtained after column chromatography (petroleum ether / ethyl acetate = 1:1).

**<sup>1</sup>H NMR** (400 MHz, CDCl<sub>3</sub>) δ 7.75-7.68 (m, 2H), 7.34-7.26 (m, 2H), 7.24-7.16 (m, 3H), 6.68-6.61 (m, 2H), 5.88 (s, 2H), 3.40 (t, *J* = 6.7 Hz, 2H), 3.00 (s, 3H), 2.68 (t, *J* = 7.0 Hz, 2H), 1.68 (dd, *J* = 7.2, 3.6 Hz, 4H) ppm;

**<sup>13</sup>C NMR** (101 MHz, CDCl<sub>3</sub>) δ 169.5, 151.7, 142.0, 129.2, 128.4, 125.9, 119.6, 110.7, 52.3, 38.4, 35.7, 28.8, 26.5 ppm;

**HR-MS** (ESI/TOF) *m/z*: Calcd. for C<sub>18</sub>H<sub>23</sub>N<sub>2</sub>O [M+H]<sup>+</sup> 283.1805; Found: 283.1784.

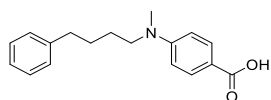

**9ak.** White solid (131 mg, 92% yield) was obtained after column chromatography (petroleum ether / ethyl acetate = 1:1).

**<sup>1</sup>H NMR** (400 MHz, DMSO-*d*<sub>6</sub>) δ 12.02 (s, 1H), 7.72-7.66 (m, 2H), 7.25 (t, *J* = 7.5 Hz, 2H), 7.20-7.11 (m, 3H), 6.68-6.60 (m, 2H), 3.39 (t, *J* = 7.1 Hz, 2H), 2.92 (s, 3H), 2.59 (t, *J* = 7.3 Hz, 2H), 1.61-1.47 (m, 4H) ppm;

**<sup>13</sup>C NMR** (101 MHz, DMSO-*d*<sub>6</sub>) δ 168.0, 152.4, 142.5, 131.5, 128.72, 128.69, 126.1, 117.0, 110.9, 51.6, 38.4, 35.4, 28.7, 26.3 ppm;

**HR-MS** (ESI/TOF) *m/z*: Calcd. for C<sub>18</sub>H<sub>22</sub>NO<sub>2</sub> [M+H]<sup>+</sup> 284.1645; Found: 284.1625.

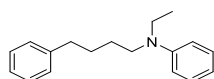

**9al.** Yellow oil (145 mg, 96% yield) was obtained after column chromatography (petroleum ether / ethyl acetate = 400:1).

**<sup>1</sup>H NMR** (400 MHz, CDCl<sub>3</sub>) δ 7.39-7.31 (m, 2H), 7.31-7.20 (m, 5H), 6.73 (d, *J* = 8.2 Hz, 3H), 3.41 (q, *J* = 6.5 Hz, 2H), 3.36-3.30 (m, 2H), 2.77-2.67 (m, 2H), 1.80-1.66 (m, 4H), 1.20 (q, *J* = 5.9 Hz, 3H) ppm;

**<sup>13</sup>C NMR** (101 MHz, CDCl<sub>3</sub>) δ 148.0, 142.4, 129.3, 128.4, 128.3, 125.8, 115.4, 111.9, 50.3, 45.0, 35.9, 29.1, 27.3, 12.3 ppm;

**HR-MS** (ESI/TOF) *m/z*: Calcd. for C<sub>18</sub>H<sub>24</sub>N [M+H]<sup>+</sup> 254.1903; Found: 254.1900.

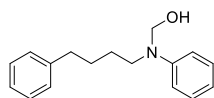

**9am.** Yellow oil (88 mg, 72% yield) was obtained after column chromatography (petroleum ether / ethyl acetate = 5:1).

**<sup>1</sup>H NMR** (400 MHz, CDCl<sub>3</sub>) δ 7.36-7.29 (m, 2H), 7.28-7.20 (m, 5H), 6.80-6.75 (m, 3H), 3.78 (t, *J* = 5.9 Hz, 2H), 3.48 (t, *J* = 5.9 Hz, 2H), 3.37 (t, *J* = 6.9 Hz, 2H), 2.69 (t, *J* = 6.9 Hz, 2H), 2.01 (s, 1H), 1.75-1.65 (m, 4H) ppm;

**<sup>13</sup>C NMR** (101 MHz, CDCl<sub>3</sub>) δ 148.3, 142.2, 129.3, 128.38, 128.36, 125.8, 116.8, 113.0, 60.0, 53.2, 51.7, 35.8, 28.9, 26.5 ppm;

**HR-MS** (ESI/TOF) *m/z*: Calcd. for C<sub>17</sub>H<sub>22</sub>NO [M+H]<sup>+</sup> 256.1696; Found: 256.1663.

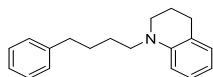

**9an.** Yellow oil (133 mg, 96% yield) was obtained after column chromatography (petroleum ether / ethyl acetate = 200:1).

**<sup>1</sup>H NMR** (400 MHz, CDCl<sub>3</sub>) δ 7.43-7.35 (m, 2H), 7.30 (dd, *J* = 8.0, 4.0 Hz, 3H), 7.15 (t, *J* = 6.6 Hz, 1H), 7.04 (t, *J* = 5.6 Hz, 1H), 6.70-6.60 (m, 2H), 3.40-3.32 (m, 4H), 2.86 (t, *J* = 5.8 Hz, 2H), 2.80-2.72 (m, 2H), 2.08-1.99 (m, 2H), 1.84-1.70 (m, 4H) ppm;

**<sup>13</sup>C NMR** (101 MHz, CDCl<sub>3</sub>) δ 145.3, 142.4, 129.2, 128.44, 128.37, 127.1, 125.8, 122.2, 115.3, 110.5, 51.4, 49.6, 35.9, 29.2, 28.3, 26.1, 22.3 ppm;

**HR-MS** (ESI/TOF) *m/z*: Calcd. for C<sub>19</sub>H<sub>24</sub>N [M+H]<sup>+</sup> 266.1903; Found: 266.1885.

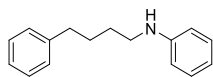

**9ao.**<sup>17</sup> Yellow oil (73 mg, 65% yield) was obtained after column chromatography (petroleum ether / ethyl acetate = 50:1).

**<sup>1</sup>H NMR** (400 MHz, CDCl<sub>3</sub>) δ 7.34-7.27 (m, 2H), 7.24-7.15 (m, 5H), 6.75-6.68 (m, 1H), 6.65-6.58 (m, 2H), 3.15 (t, *J* = 6.9 Hz, 2H), 2.68 (t, *J* = 7.4 Hz, 2H), 1.79-1.64 (m, 4H) ppm;

**<sup>13</sup>C NMR** (101 MHz, CDCl<sub>3</sub>) δ 148.3, 142.2, 129.2, 128.4, 128.3, 125.8, 117.2, 112.7, 43.9, 35.6, 29.1, 28.9 ppm.

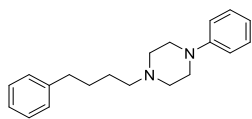

**9ap.** Yellow oil (131 mg, 89% yield) was obtained after column chromatography (petroleum ether / ethyl acetate = 2:1).

**<sup>1</sup>H NMR** (400 MHz, CDCl<sub>3</sub>) δ 7.34-7.26 (m, 4H), 7.22 (dd, *J* = 7.2, 2.3 Hz, 3H), 6.98-6.93 (m, 2H), 6.90-6.84 (m, 1H), 3.23 (t, *J* = 3.7 Hz, 4H), 2.68 (t, *J* = 6.4 Hz, 2H), 2.62 (t, *J* = 4.8 Hz, 4H), 2.45 (t, *J* = 7.1 Hz, 2H), 1.73-1.57 (m, 4H) ppm;

**<sup>13</sup>C NMR** (101 MHz, CDCl<sub>3</sub>) δ 151.3, 142.4, 129.1, 128.4, 128.3, 125.7, 119.6, 116.0, 58.5, 53.3, 49.1, 35.8, 29.4, 26.5 ppm;

**HR-MS** (ESI/TOF) *m/z*: Calcd. for C<sub>20</sub>H<sub>27</sub>N<sub>2</sub> [M+H]<sup>+</sup> 295.2169; Found: 295.2149.

## Preparation of aripiprazole (13a)

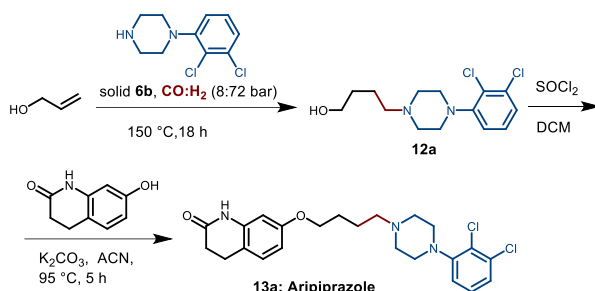

**Fig. S7.** Preparation of aripiprazole.

In a typical experiment, a Parr stainless steel autoclave (125 mL) was loaded with a mixture of **6b** (1.0 mol %), 10.0 mmol allyl alcohol, 5.0 mmol 1-(2,3-dichlorophenyl)piperazine and 20.0 mL THF. Subsequently, the autoclave was pressurized with CO (8 bar) and hydrogen (72 bar) and heated to 150 °C. After 18 h, the autoclave was allowed to cool to room temperature and the gases were vented. The solvent was removed under vacuum, the resulting crude **12a** (63% as determined by <sup>1</sup>HNMR of the crude with 1,3,5-methoxybenzene as the internal standard, *l:b* = 96/4) was then filtered through a plug of silica (CH<sub>2</sub>Cl<sub>2</sub>/MeOH = 40:1) and concentrated *in vacuo*. This linear amino alcohol (302 mg, 1.0 mmol) was dissolved in CH<sub>2</sub>Cl<sub>2</sub> (4.0 mL) followed by addition of sulfoxide chloride (0.6 mL, 1.5 mmol). After stirring at 60 °C for 3.5 h, the resulting reaction mixture was cooled to 0 °C and stirred for 2 h, the solvent was removed under vacuum, the resulting crude was then filtered through a plug of silica (CH<sub>2</sub>Cl<sub>2</sub>/MeOH = 100:1) and concentrated *in vacuo*. This resulting crude (297 mg, 0.93 mmol) was dissolved in acetonitrile (4.0 mL) followed by addition of 7-hydroxy-3,4-dihydroquinolin-2(1H)-one (152 mg, 0.93 mmol, 1.0 equiv.), K<sub>2</sub>CO<sub>3</sub> (139 mg, 1.02 mmol, 1.1 equiv.). After stirring at 95 °C overnight, the solvent was removed under vacuum, and then filtered through a plug of silica (petroleum ether / ethyl acetate = 1:1) and concentrated *in vacuo* to give aripiprazole (**13a**, 391 mg, 94 %) as a white solid.

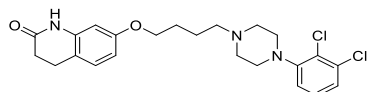

**13a.** <sup>1</sup>H NMR (400 MHz, CDCl<sub>3</sub>) δ 9.11 (s, 1H), 7.15-7.09 (m, 2H), 7.02 (d, *J* = 8.3 Hz, 1H), 6.94 (dd, *J* = 6.3, 3.2 Hz, 1H), 6.51 (dd, *J* = 8.3, 2.4 Hz, 1H), 6.39 (d, *J* = 2.4 Hz, 1H), 3.95 (t, *J* = 6.2 Hz, 2H), 3.06 (t, *J* = 4.8 Hz, 4H), 2.88 (dd, *J* = 8.5, 6.5 Hz, 2H), 2.72-2.53 (m, 6H), 2.47 (t, *J* = 7.4 Hz, 2H), 1.85-1.75 (m, 2H), 1.73-1.64 (m, 2H) ppm;

<sup>13</sup>C NMR (101 MHz, CDCl<sub>3</sub>) δ 172.3, 158.7, 151.3, 138.3, 134.0, 128.6, 127.4, 124.5, 118.6, 115.6, 108.8, 102.3, 67.9, 58.2, 53.3, 51.4, 31.1, 27.3, 24.6, 23.4 ppm.

### Preparation of laurel aripiprazole (13b)

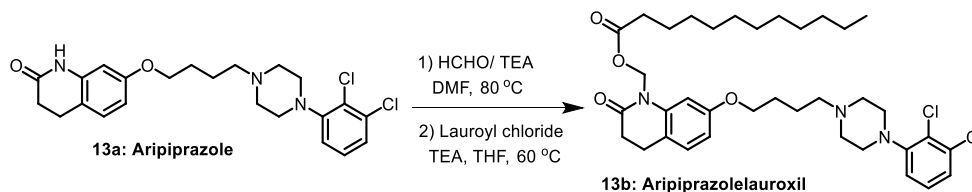

**Fig. S8.** Preparation of aripiprazolelauroxil.

A Schlenk tube was charged with aripiprazole (448 mg, 1 mmol), formaldehyde aqueous solution (37%, 1.6 mL), triethylamine (0.50 eq, 52 mg, 0.5 mmol,) and DMF (1.5 mL), and stirred at 80 °C for 2.5



of silica ( $\text{CH}_2\text{Cl}_2/\text{MeOH} = 40:1$ ) and concentrated in vacuo. This linear amino alcohol (302 mg, 1.0 mmol) was dissolved in  $\text{CH}_2\text{Cl}_2$  (4.0 mL) followed by addition of sulfoxide chloride (0.6 ml, 1.5 mmol). After stirring at  $60^\circ\text{C}$  for 3.5 h, the resulting reaction mixture was cooled to  $0^\circ\text{C}$  and stirred for 2 h, the solvent was removed under vacuum, the resulting crude was then filtered through a plug of silica ( $\text{CH}_2\text{Cl}_2 / \text{MeOH} = 100:1$ ) and concentrated in vacuo, followed by the addition of potassium phthalimide (266 mg, 1.8 mmol). The reagents were suspended in 4.0 mL of dry DMF and allowed to reflux at  $100^\circ\text{C}$  for 3 hours. Reaction was cooled, quenched with addition of water, and extracted with EtOAc (4 x 20 mL). The organic phases were combined, dried over  $\text{Na}_2\text{SO}_4$ , filtered, concentrated, and purified by flash column chromatography in  $\text{CH}_2\text{Cl}_2$ , 397 mg of yellow solid was obtained with a 92% yield. This intermediate was dissolved in 4.0 mL EtOH, followed by the addition of hydrazine monohydrate. The reaction mixture was allowed to mix for 5 hours at  $80^\circ\text{C}$  then allowed to cool to rt. The solvent was removed under vacuum, the resulting crude was then filtered through a plug of silica ( $\text{CH}_2\text{Cl}_2 / \text{MeOH} = 10:1$ ) and concentrated in vacuo. This 4-(4-(2,3-dichlorophenyl)piperazin-1-yl)butan-1-amine (250 mg, 0.83 mmol) was dissolved in 4.0 mL chloroform, and 115 mg  $\text{K}_2\text{CO}_3$  was added. The 9H-fluorene-2-carbonyl chloride (189 mg, 0.83 mmol) was dissolved in proper amount of chloroform, and then dropped into a three-way flask of 10.0 mL with a constant pressure drop funnel. Titration reaction 1h, extraction, mother solution decompression concentration to obtain a light yellow solid, ether recrystallization to obtain *N*-(4-(4-(2,3-dichlorophenyl)piperazin-1-yl)butyl)-9H-fluorene-3-carboxamide (**14**, 289 mg, 95 %) as a white solid.

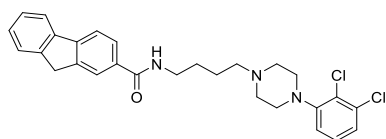

**14**  $^1\text{H NMR}$  (400 MHz,  $\text{CDCl}_3$ )  $\delta$  7.95 (s, 1H), 7.84-7.73 (m, 3H), 7.54 (d,  $J = 7.2$  Hz, 1H), 7.43-7.30 (m, 2H), 7.11 (dd,  $J = 8.0, 1.4$  Hz, 1H), 7.00 (t,  $J = 8.0$  Hz, 1H), 6.90 (t,  $J = 5.5$  Hz, 1H), 6.79 (dd,  $J = 8.0, 1.5$  Hz, 1H), 3.89 (s, 2H), 3.50 (q,  $J = 6.2$  Hz, 2H), 3.09-2.89 (m, 4H), 2.61 (s, 4H), 2.46 (t,  $J = 6.8$  Hz, 2H), 1.79-1.59 (m, 4H) ppm;

$^{13}\text{C NMR}$  (101 MHz,  $\text{CDCl}_3$ )  $\delta$  168.1, 151.1, 144.7, 143.9, 143.4, 140.7, 134.0, 133.4, 127.6, 127.5, 127.4, 127.0, 125.8, 125.2, 124.6, 123.9, 120.5, 119.7, 118.5, 58.1, 53.3, 51.1, 40.1, 36.9, 27.6, 24.5 ppm;

**HR-MS** (ESI/TOF)  $m/z$ : Calcd. for  $\text{C}_{28}\text{H}_{30}\text{Cl}_2\text{N}_3\text{O}$   $[\text{M}+\text{H}]^+$  494.1766; Found: 494.1772.

## Preparation of brexpiprazole (**15**)

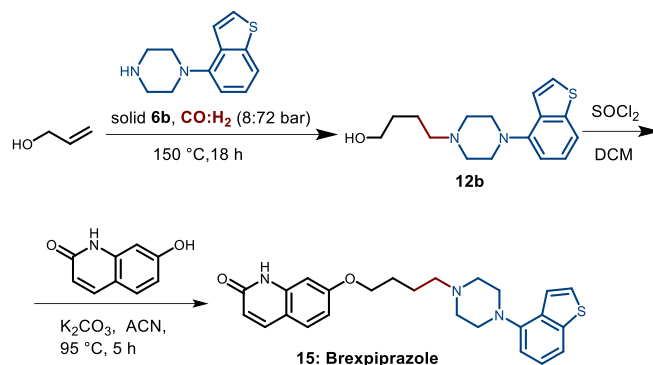

**Fig. S10.** Preparation of brexpiprazole.

In a typical experiment, a Parr stainless steel autoclave (125 mL) was loaded with a mixture of **6b** (1.0 mol %), 10.0 mmol allyl alcohol, 5.0 mmol 1-(benzo[*b*]thiophen-4-yl)piperazine and 20.0 mL THF. Subsequently, the autoclave was pressurized with CO (8 bar) and hydrogen (72 bar) and heated to 150 °C. After 18 h, the autoclave was allowed to cool to room temperature and the gases were vented. The solvent was removed under vacuum, the resulting crude **12b** (56% as determined by <sup>1</sup>H NMR of the crude with 1,3,5-methoxybenzene as the internal standard, *l:b* = 96/4) was then filtered through a plug of silica (CH<sub>2</sub>Cl<sub>2</sub>/MeOH = 20:1) and concentrated *in vacuo*. This linear amino alcohol (290 mg, 1.0 mmol) was dissolved in CH<sub>2</sub>Cl<sub>2</sub> (4.0 mL) followed by addition of sulfoxide chloride (0.6 mL, 1.5 mmol). After stirring at 60 °C for 3.5 h, the resulting reaction mixture was cooled to 0 °C and stirred for 2 h, the solvent was removed under vacuum, the resulting crude was then filtered through a plug of silica (CH<sub>2</sub>Cl<sub>2</sub>/MeOH = 100:1) and concentrated *in vacuo*. This resulting crude (280, 0.91 mmol) was dissolved in acetonitrile (4.0 mL) followed by addition of 7-(Allyloxy)quinolin-2(1*H*)-one (146 mg, 0.91 mmol, 1.0 equiv.), K<sub>2</sub>CO<sub>3</sub> (136 mg, 1.01 mmol, 1.1 equiv.). After stirring at 95 °C overnight, the solvent was removed under vacuum, and then filtered through a plug of silica (petroleum ether / ethyl acetate = 1:1) and concentrated *in vacuo* to give brexpiprazole (**15**, 331 mg, 84 %) as a white solid.

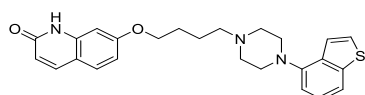

**15.**<sup>18</sup> <sup>1</sup>H NMR (400 MHz, CDCl<sub>3</sub>) δ 12.93 (s, 1H), 7.73 (d, *J* = 9.4 Hz, 1H), 7.56 (d, *J* = 8.0 Hz, 1H), 7.48-7.35 (m, 3H), 7.28 (t, *J* = 7.8 Hz, 1H), 6.91 (d, *J* = 7.9 Hz, 2H), 6.83 (dd, *J* = 8.6, 2.4 Hz, 1H), 6.59 (d, *J* = 9.3 Hz, 1H), 4.12 (t, *J* = 6.3 Hz, 2H), 3.22 (t, *J* = 5.0 Hz, 4H), 2.84-2.62 (m, 4H), 2.55 (t, *J* = 7.5 Hz, 2H), 1.98-1.84 (m, 2H), 1.83-1.67 (m, 2H) ppm;

<sup>13</sup>C NMR (101 MHz, CDCl<sub>3</sub>) δ 165.3, 161.4, 148.5, 141.1, 140.8, 140.5, 134.0, 128.9, 125.0, 124.9, 121.9, 117.8, 116.9, 114.1, 112.7, 112.1, 99.0, 68.1, 58.2, 53.6, 52.1, 27.2, 23.4 ppm.

### Preparation of BP897 (16)

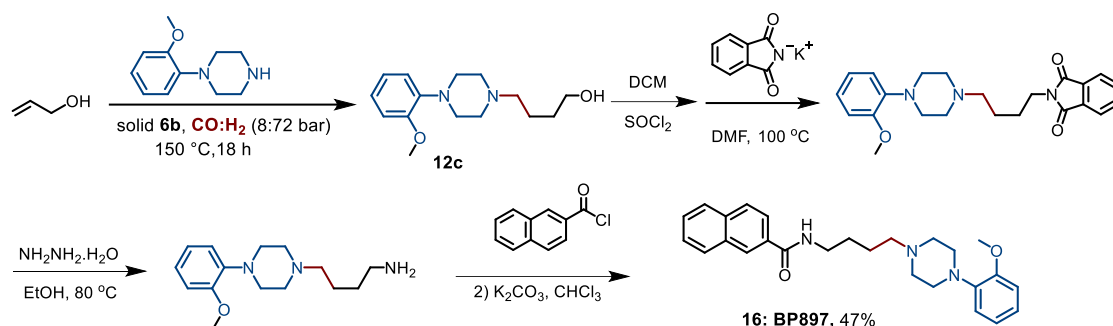

**Fig. S11.** Preparation of BP897.

In a typical experiment, a Parr stainless steel autoclave (125 mL) was loaded with a mixture of **6b** (1.0 mol %), 10.0 mmol allyl alcohol, 5.0 mmol 1-(2-methoxyphenyl)piperazine and 20.0 mL THF. Subsequently, the autoclave was pressurized with CO (8 bar) and hydrogen (72 bar) and heated to 150 °C. After 18 h, the autoclave was allowed to cool to room temperature and the gases were vented. The solvent was removed under vacuum, the resulting crude **12c** (55% as determined by <sup>1</sup>H NMR of the crude with 1,3,5-methoxybenzene as the internal standard, *l:b* = 96/4) was then filtered through a plug of silica (CH<sub>2</sub>Cl<sub>2</sub>/MeOH = 40:1) and concentrated *in vacuo*. This linear amino alcohol (264 mg, 1.0 mmol) was dissolved in CH<sub>2</sub>Cl<sub>2</sub> (4.0 mL) followed by addition of sulfoxide chloride (0.6 mL, 1.5 mmol). After stirring at 60 °C for 3.5 h, the resulting reaction mixture was cooled to 0 °C and stirred for 2 h, the solvent was removed under vacuum, the resulting crude was then filtered through a plug of silica (CH<sub>2</sub>Cl<sub>2</sub>/MeOH = 100:1) and concentrated *in vacuo*, followed by the addition of potassium phthalimide (266 mg, 1.8 mmol). The reagents were suspended in 4.0 mL of dry DMF and allowed to reflux at 100 °C for 3 hours. Reaction was cooled, quenched with addition of water, and extracted with EtOAc (4 x 20 mL). The organic phases were combined, dried over Na<sub>2</sub>SO<sub>4</sub>, filtered, concentrated, and purified by flash column chromatography in CH<sub>2</sub>Cl<sub>2</sub>. 366 mg of yellow solid was obtained with a 93% yield. This intermediate was dissolved in 4.0 mL EtOH, followed by the addition of hydrazine monohydrate. The reaction mixture was allowed to mix for 5 hours at 80 °C, then allowed to cool to rt. The solvent was removed under vacuum, the resulting crude was then filtered through a plug of silica (CH<sub>2</sub>Cl<sub>2</sub> / MeOH = 10:1) and concentrated *in vacuo*. This 4-(4-(2-methoxy-phenyl)-piperazinyl)-butyl-1-primary amine (200 mg, 0.76 mmol) was dissolved in 4.0 mL chloroform, and 208 mg K<sub>2</sub>CO<sub>3</sub> was added. The 2-naphthoyl chloride (144 mg, 0.76 mmol) was dissolved in proper amount of chloroform, and then dropped into a three-way flask of 10.0 mL with a constant pressure drop funnel. Titration reaction 1h, extraction, mother solution decompression concentration to obtain a light yellow solid, ether recrystallization to obtain *N*-[4-(2-methoxy-phenyl)-piperazinyl]-butyl-2-naphthoformamide (**16**, 307 mg, 97%) as a white solid.

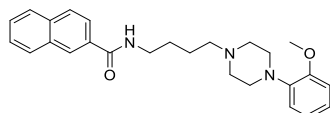

**16.** <sup>1</sup>H NMR (400 MHz, CDCl<sub>3</sub>) δ 8.61 (d, *J* = 1.8 Hz, 1H), 8.06 (dd, *J* = 8.6, 1.8 Hz, 1H), 8.00-7.90 (m, 2H), 7.88-7.80 (m, 2H), 7.57-7.43 (m, 2H), 7.10-7.01 (m, 1H), 6.93-6.82 (m, 3H), 3.83 (s, 3H), 3.60



(q,  $J = 6.1$  Hz, 4H), 3.43 (d,  $J = 4.7$  Hz, 4H), 3.19-2.90 (m, 4H), 2.05 (q,  $J = 7.4$  Hz, 2H), 1.80 (q,  $J = 6.5$  Hz, 2H) ppm;

$^{13}\text{C}$  NMR (101 MHz,  $\text{CDCl}_3$ )  $\delta$  167.7, 152.0, 138.8, 134.7, 132.7, 131.4, 129.2, 128.14, 128.10, 127.6, 127.5, 126.4, 124.3, 124.2, 121.2, 118.8, 111.3, 56.4, 55.4, 52.3, 47.4, 38.1, 26.1, 20.7 ppm;

HR-MS (ESI/TOF)  $m/z$ : Calcd. for  $\text{C}_{26}\text{H}_{32}\text{N}_3\text{O}_2$   $[\text{M}+\text{H}]^+$  418.2495; Found: 418.2528.

### Preparation of buspirone (18)

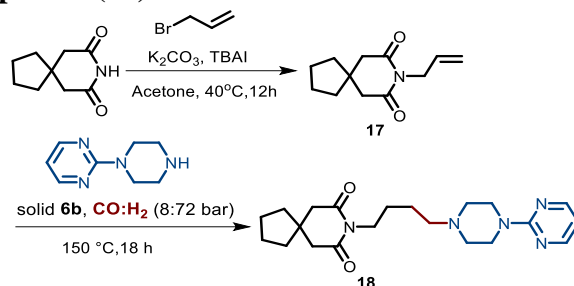

Fig. S12. Preparation of buspirone.

To a solution of 8-azaspiro[4.5]decane-7,9-dione (1.19 g, 7.11 mmol, 1.0 equiv.) in acetone (15 mL) was added allyl bromide (0.675 mL, 7.8 mmol, 1.1 equiv.),  $\text{K}_2\text{CO}_3$  (1.96 g, 14.2 mmol, 2.0 equiv.) and TBAI (0.25 g, 0.68 mmol, 9.5 mol%). After stirring for 72 h at roomtemperature, the reaction mixture was filtered through Celite and the filtrate concentrated in vacuo to give the crude which was purified via column chromatography (pentane/EtOAc = 1/10) to give **17** (1.32 g, 6.35 mmol, 89%) as a colourless oil. In a typical experiment, a Parr stainless steel autoclave (125 mL) was loaded with a mixture of **6b** (1.0 mol %), 10.0 mmol **17**, 5.0 mmol 2-(piperazin-1-yl)pyrimidine and 20.0 mL THF. Subsequently, the autoclave was pressurized with  $\text{CO}$  (8 bar) and hydrogen (72 bar) and heated to  $150^\circ\text{C}$ . After 18 h, the autoclave was allowed to cool to room temperature and the gases were vented. The solvent was removed under vacuum, the resulting crude **18** (63% as determined by  $^1\text{H}$  NMR of the crude with 1,3,5-methoxybenzene as the internal standard,  $l:b = 96/4$ ) was then purified via column chromatography ( $\text{CH}_2\text{Cl}_2 / \text{EtOAc} = 1:200$ ) to give buspirone as a colourless solid.

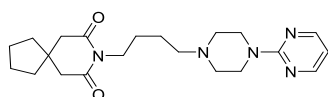

**18.**  $^{18}$   $^1\text{H}$  NMR (400 MHz,  $\text{CDCl}_3$ )  $\delta$  8.28 (d,  $J = 4.7$  Hz, 2H), 6.45 (t,  $J = 4.8$  Hz, 1H), 3.82-3.74 (m, 6H), 2.57 (s, 4H), 2.47 (t,  $J = 5.1$  Hz, 4H), 2.37 (t,  $J = 6.8$  Hz, 2H), 1.72-1.67 (m, 4H), 1.54-1.45 (m, 8H) ppm;

$^{13}\text{C}$  NMR (101 MHz,  $\text{CDCl}_3$ )  $\delta$  172.2, 161.7, 157.7, 109.7, 58.3, 53.1, 44.9, 43.7, 39.5, 39.4, 39.3, 37.6, 26.1, 24.25, 24.19 ppm.

## 5. SEM, TEM, EDX & HAADF-STEM images of coordination assemblies

### 5.1 SEM images of coordination assemblies

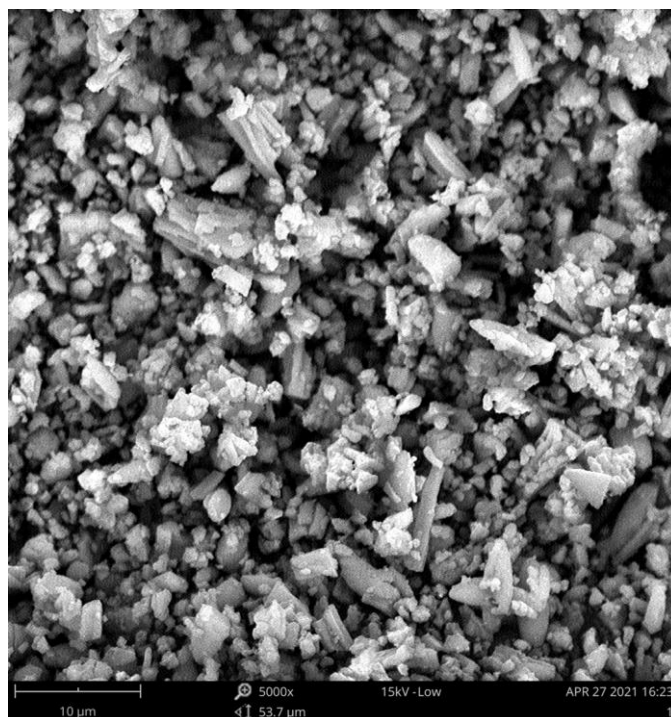

**Fig. S13.** SEM image of freshly prepared NHC-Rh coordination assembly **5** (scale bar 10 μm).

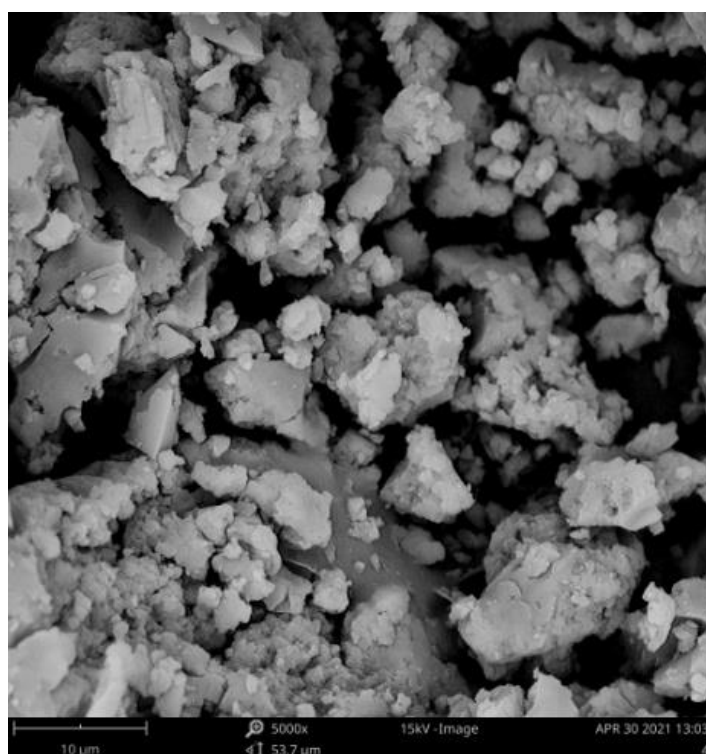

**Fig. S14.** SEM image of freshly prepared NHC-Rh coordination assembly **6a** (scale bar 10 μm).

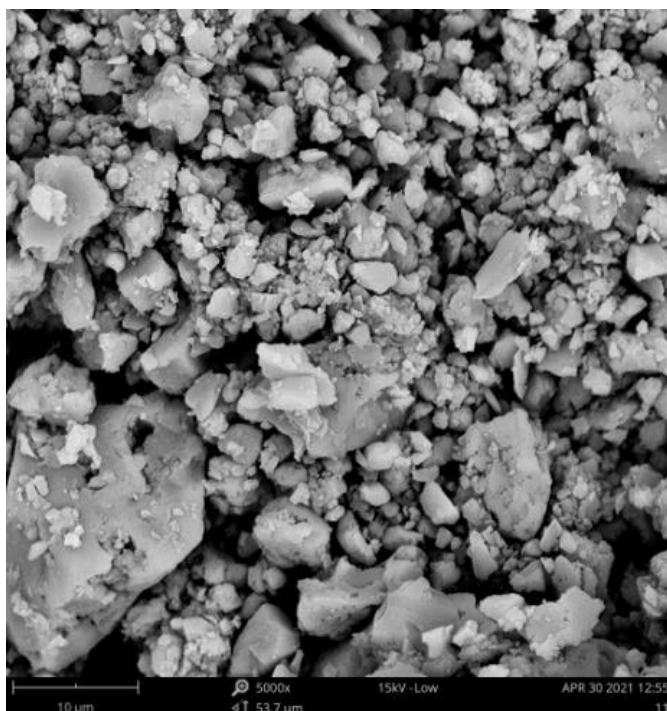

**Fig. S15.** SEM image of freshly prepared NHC-Rh coordination assembly **6b** (scale bar 10 μm).

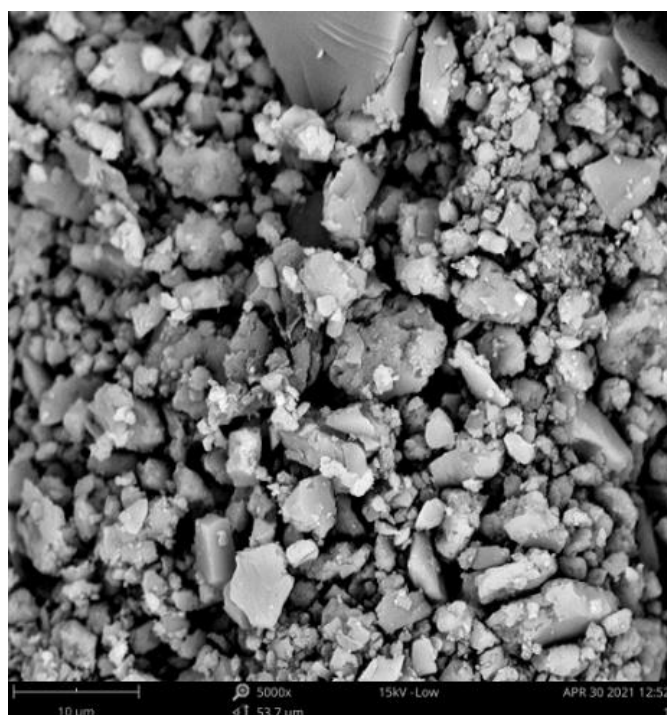

**Fig. S16.** SEM image of freshly prepared NHC-Rh coordination assembly **6c** (scale bar 10 μm).

## 5.2 EDX of coordination assemblies

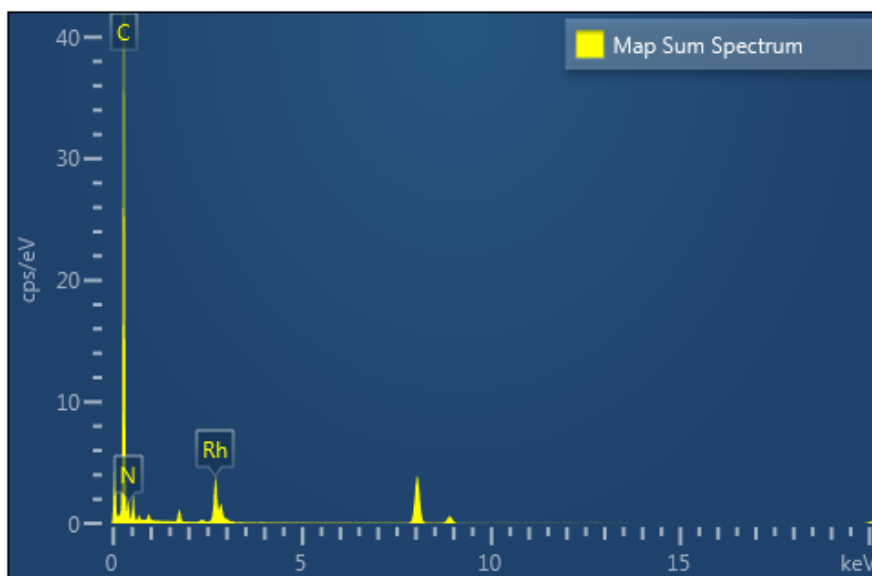

Fig. S17. EDX pattern of newly prepared NHC-Rh coordination assembly **6b** measured with TEM.

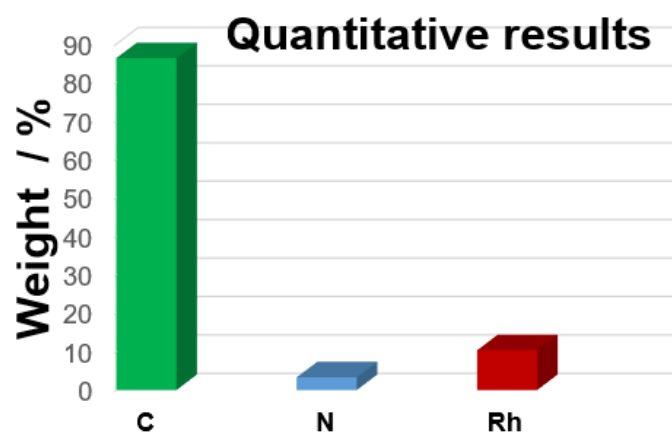

Fig. S18. EDX pattern in percentage of newly prepared NHC-Rh coordination assembly **6b** measured with TEM. The Cu signal originates from the microgate used.

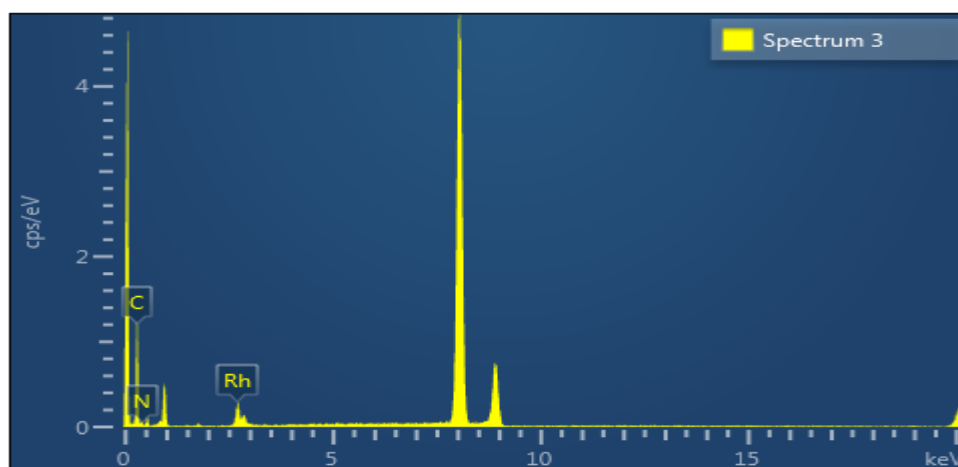

Fig. S19. EDX pattern of recovered NHC-Rh coordination assembly **6b** measured with TEM.

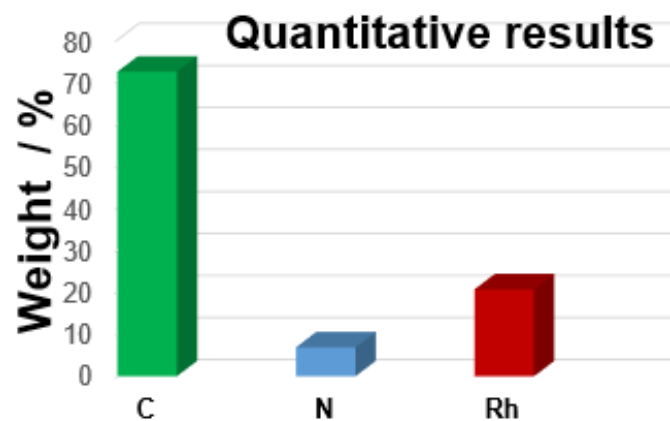

**Fig. S20.** EDX pattern in percentage of recovered NHC-Rh coordination assembly **6b** measured with TEM. The Cu signal originates from the microgate used.

### 5.3 Magnified HAADF-STEM images of NHC-Rh coordination assembly **6b**

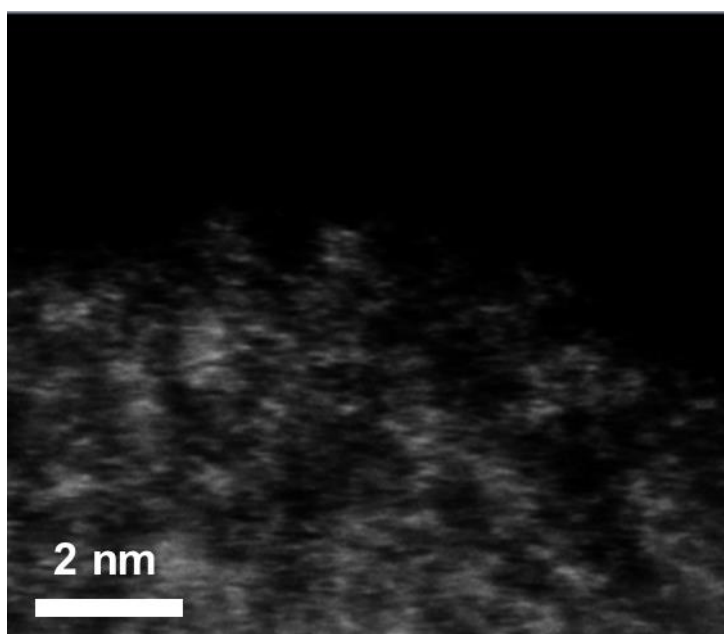

**Fig. S21.** Magnified HAADF-STEM image of freshly prepared NHC-Rh coordination assembly **6b** (scale bar 2 nm).

#### 5.4 SEM, TEM, EDX & HAADF-STEM images of recovered NHC-Rh coordination assembly **6b**

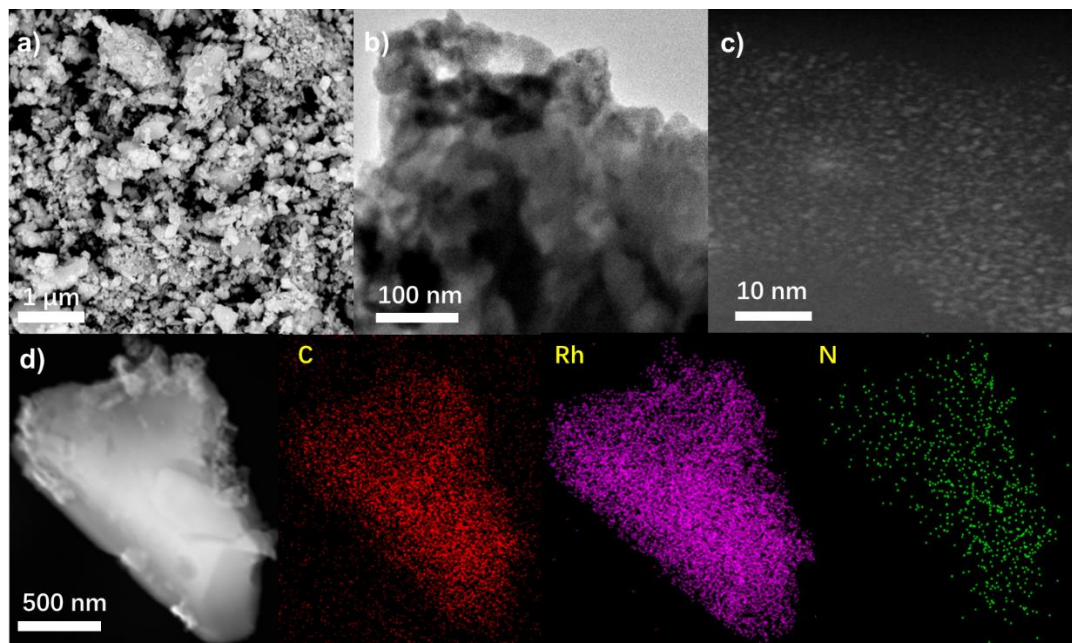

**Fig. S22.** (a) SEM, (b) TEM, and (c) magnified HAADF-STEM images of the recovered solid **6b** (white dots represent individual Rh atoms), respectively. (d) EDS mapping of the recovered solid **6b**.

## 6. XPS, PXRD, Solid-state $^{13}\text{C}$ NMR, FT-IR, TG & $\text{N}_2$ sorption studies

### 6.1 XPS spectra of coordination assemblies

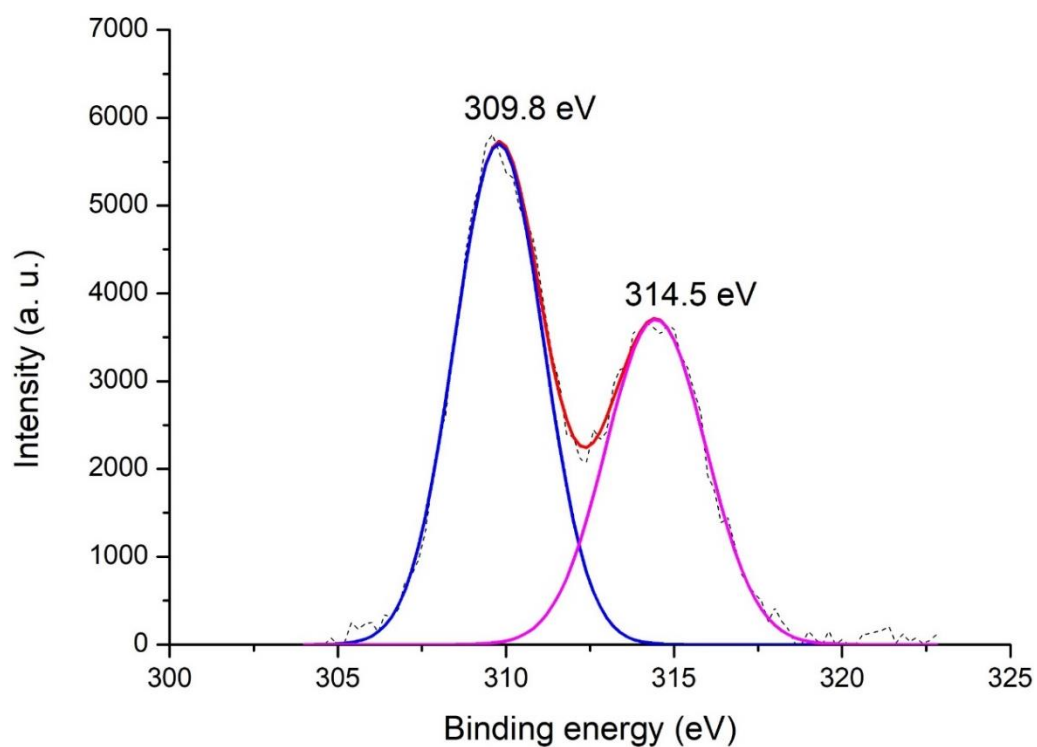

Fig. S23. XPS spectrum of freshly prepared NHC-Rh coordination assembly **5**.

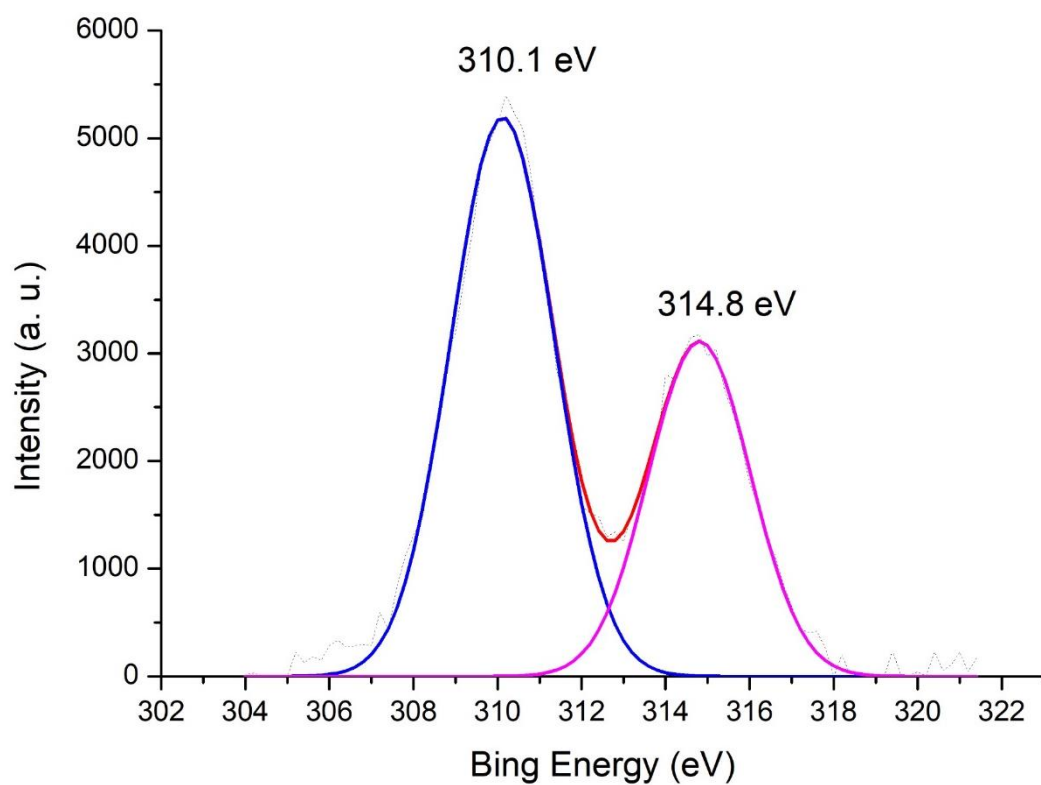

Fig. S24. XPS spectrum of freshly prepared NHC-Rh coordination assembly **6a**.

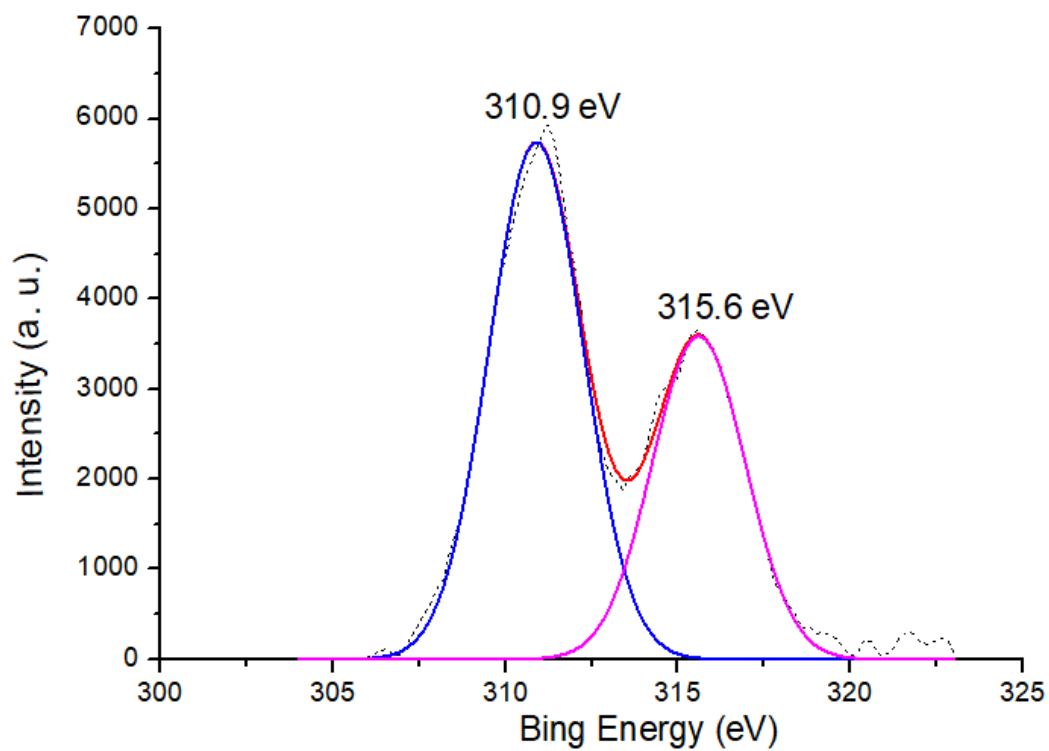

Fig. S25. XPS spectrum of freshly prepared NHC-Rh coordination assembly **6b**.

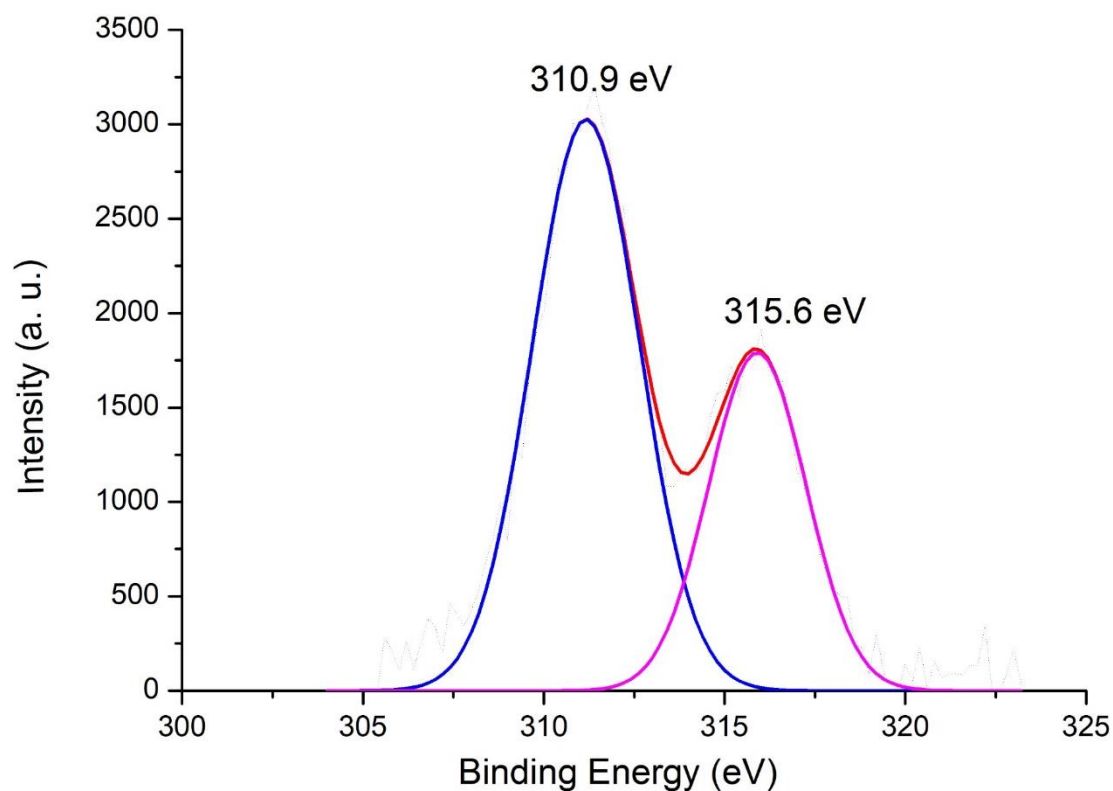

Fig. S26. XPS spectrum of freshly prepared NHC-Rh coordination assembly **6c**.



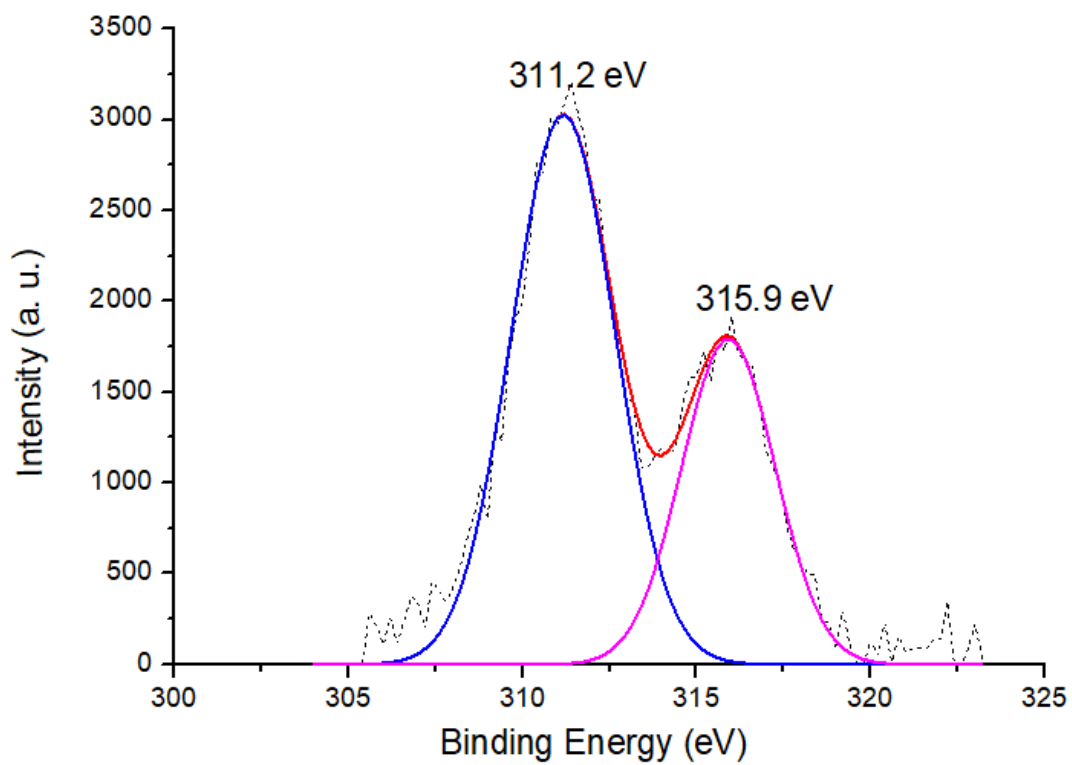

**Fig. S27.** XPS spectrum of homogeneous bis-NHC-Rh complex **4b**.

## 6.2 PXRD spectra of coordination assemblies

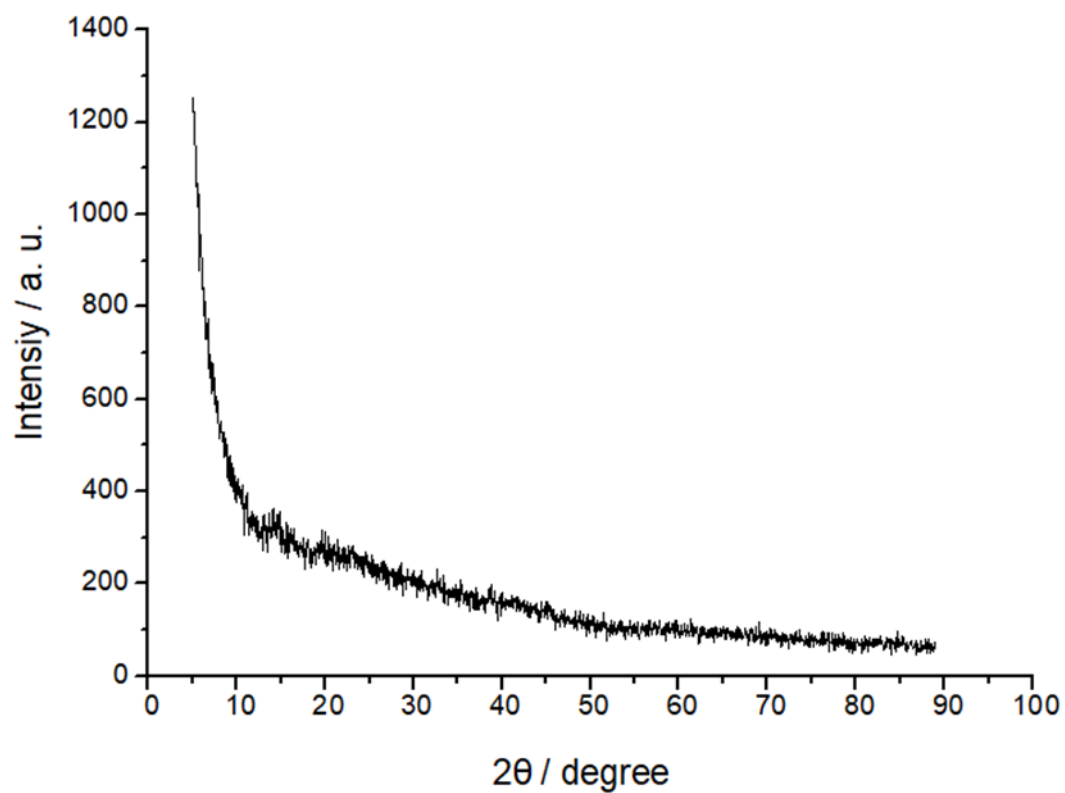

Fig. S28. PXRD spectrum of freshly prepared NHC-Rh coordination assembly **6b**.

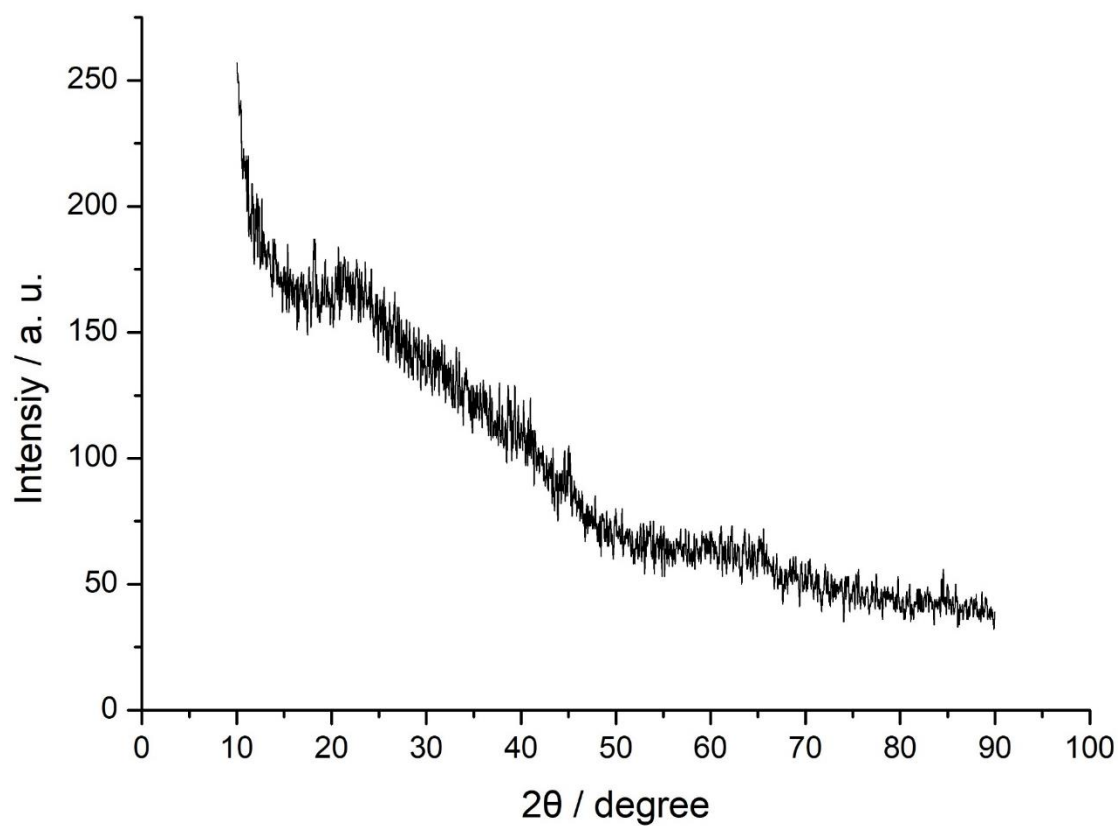

Fig. S29. PXRD spectrum of recovered NHC-Rh coordination assembly **6b**.

### 6.3 Solid-state $^{13}\text{C}$ NMR spectra

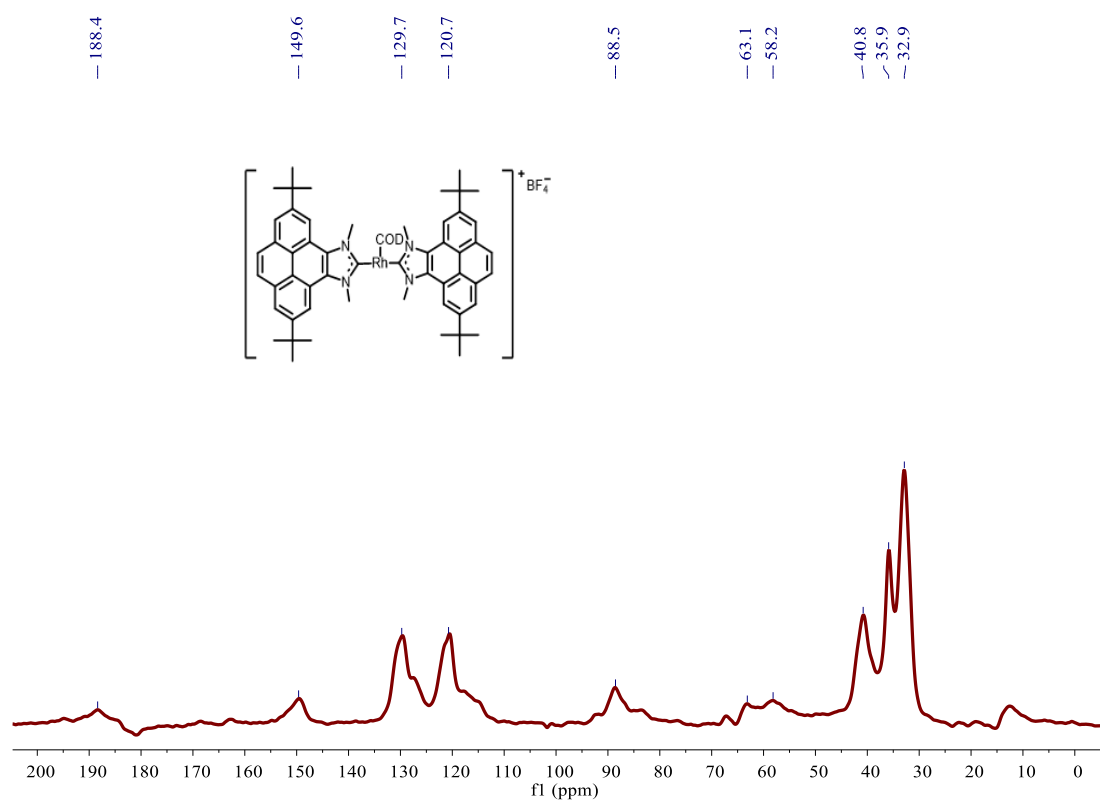

**Fig. S30.** Solid-state  $^{13}\text{C}$  NMR spectrum of NHC-Rh complex **4b**.

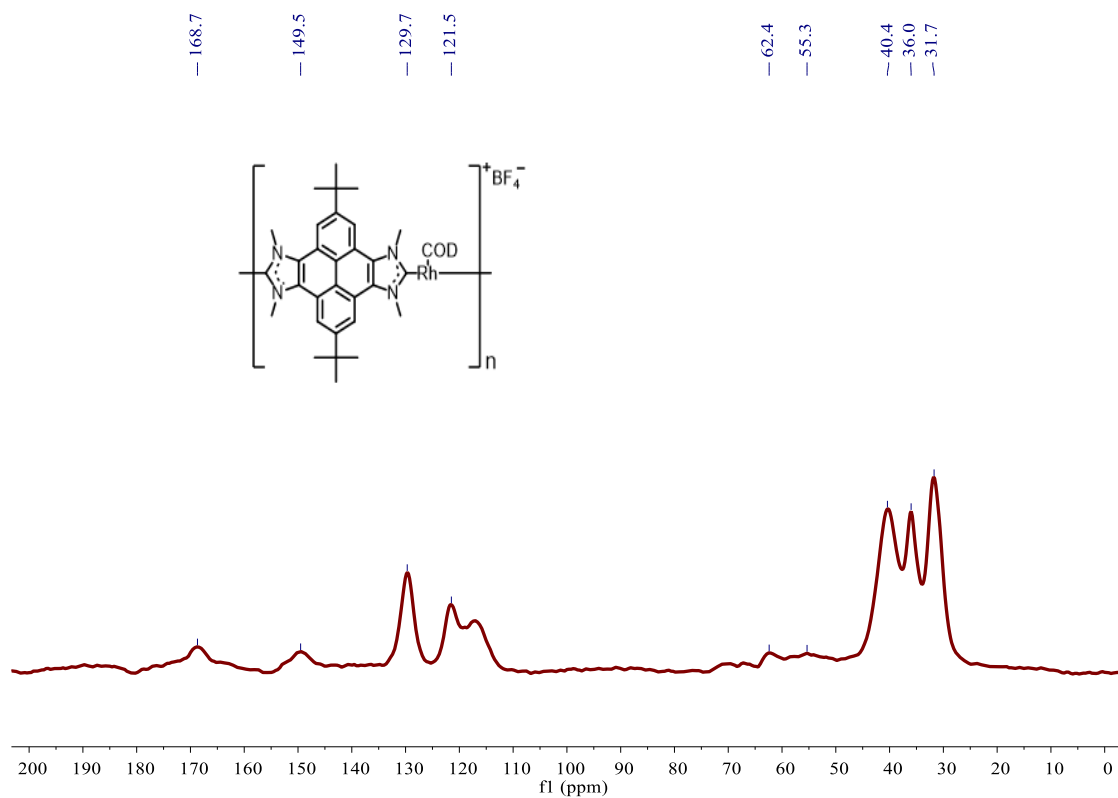

**Fig. S31.** Solid-state  $^{13}\text{C}$  NMR spectrum of freshly prepared NHC-Rh coordination assembly **6b**.

#### 6.4 FT-IR spectra of coordination assemblies

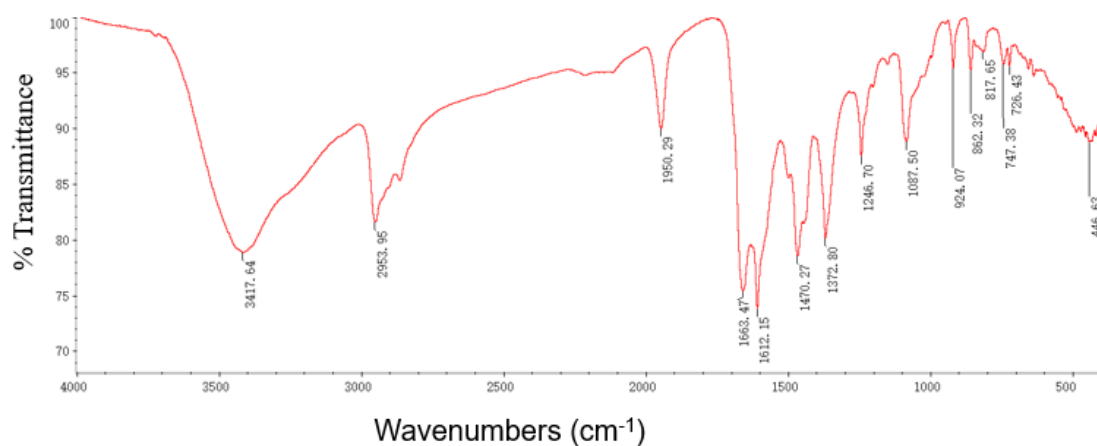

Fig. S32. FT-IR spectrum of freshly prepared NHC-Rh complex **4b**.

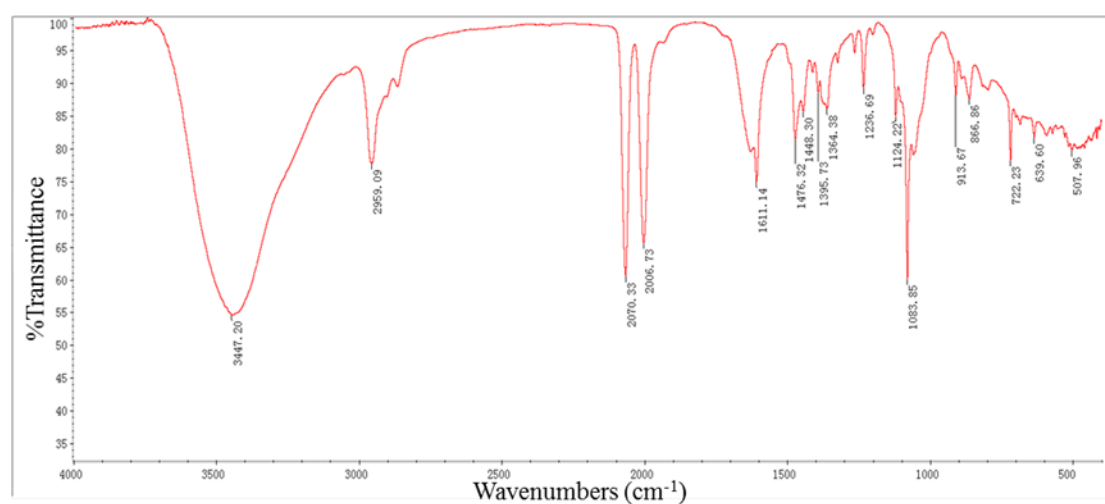

Fig. S33. FT-IR spectrum of freshly prepared NHC-Rh complex **4a**.

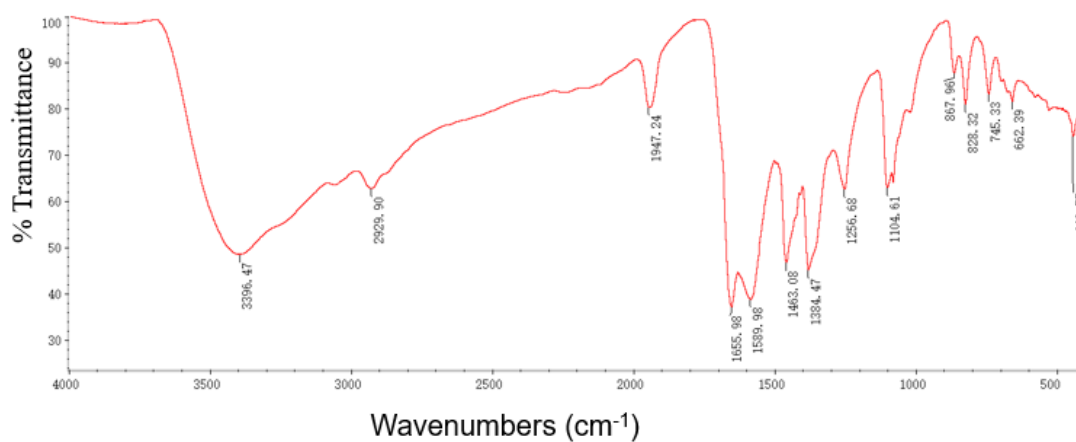

Fig. S34. FT-IR spectrum of freshly prepared NHC-Rh coordination assembly **5**.

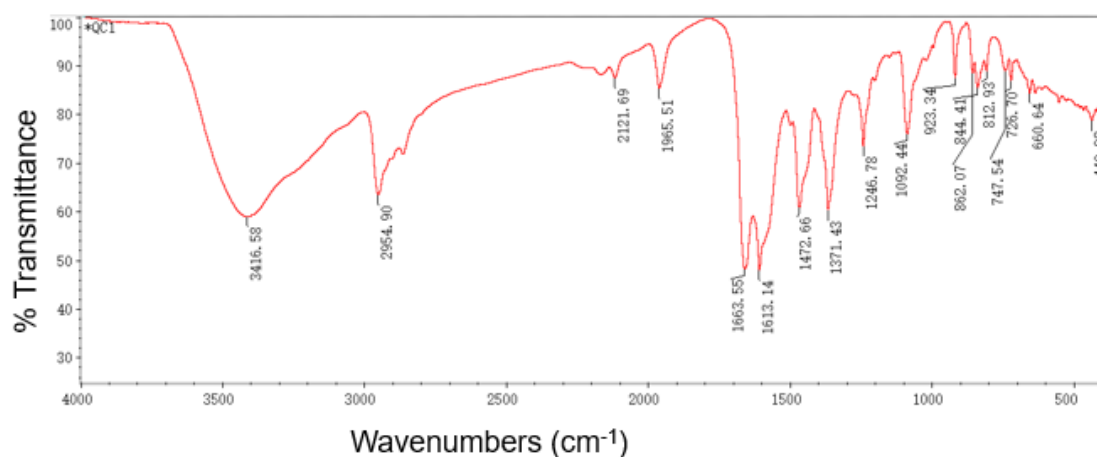

Fig. S35. FT-IR spectrum of freshly prepared NHC-Rh coordination assembly **6a**.

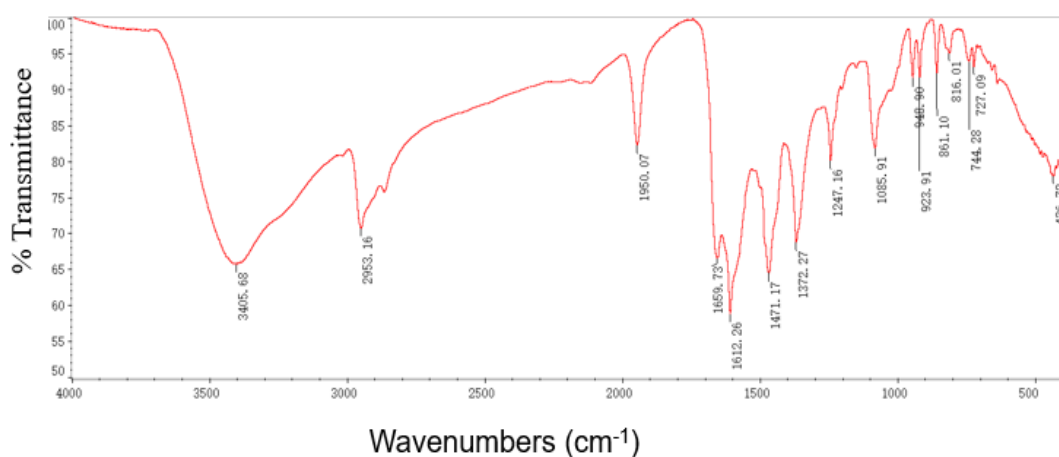

Fig. S36. FT-IR spectrum of freshly prepared NHC-Rh coordination assembly **6b**.

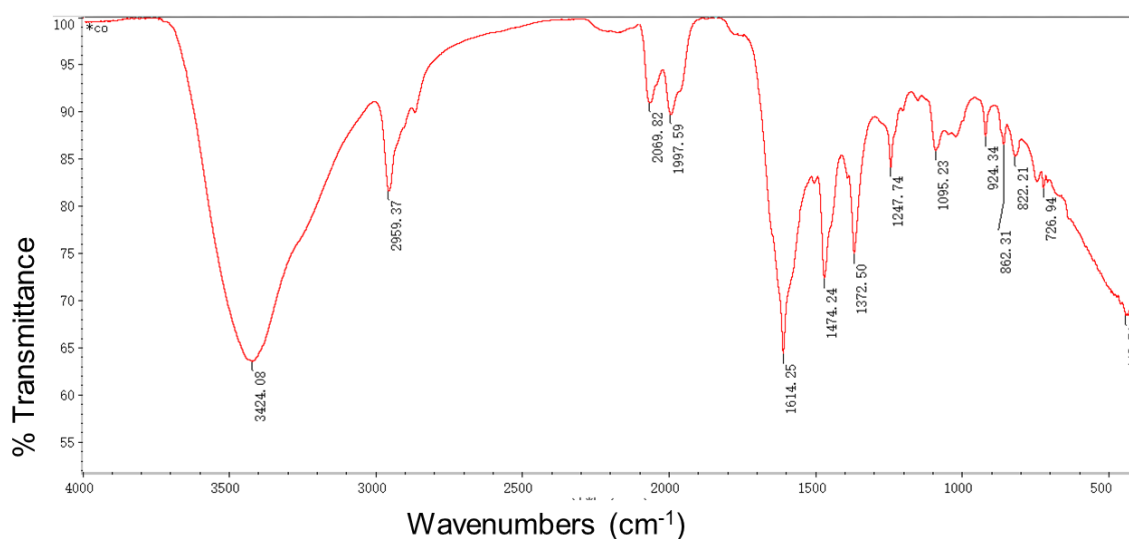

Fig. S37. FT-IR spectrum of recovered NHC-Rh coordination assembly **6b** after the 18<sup>th</sup> run.

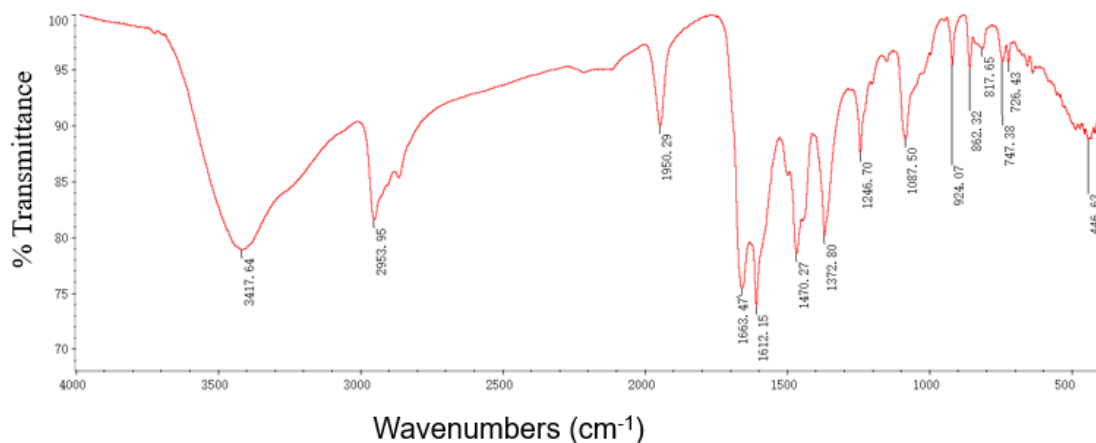

**Fig. S38.** FT-IR spectrum of freshly prepared NHC-Rh coordination assembly **6c**.

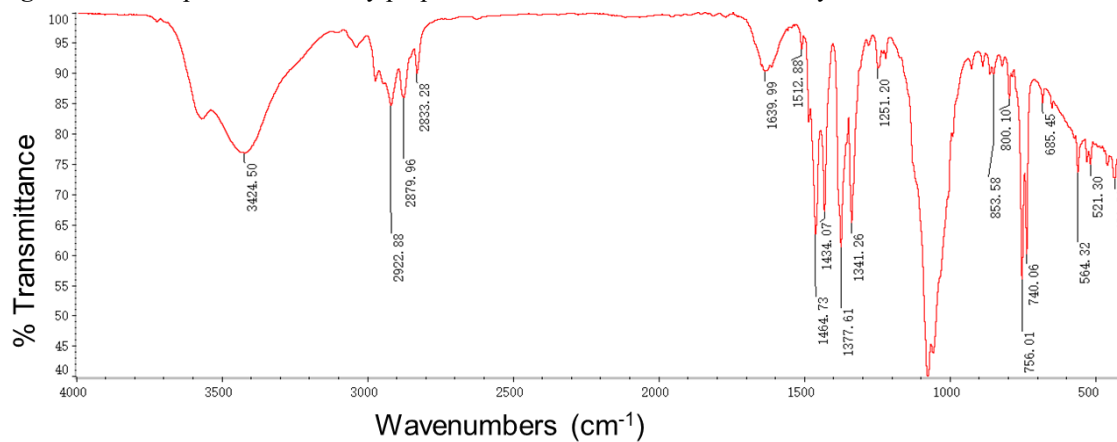

**Fig. S39.** FT-IR spectrum of freshly prepared NHC-Rh complex **6b** after 200 °C.

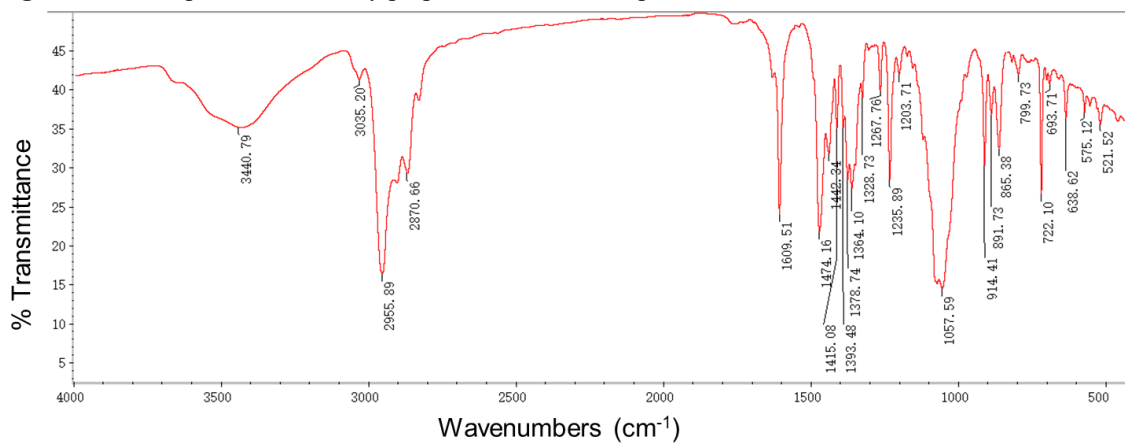

**Fig. S40.** FT-IR spectrum of freshly prepared NHC-Rh complex **6a** after 200 °C.

## 6.5 TG spectra of coordination assemblies

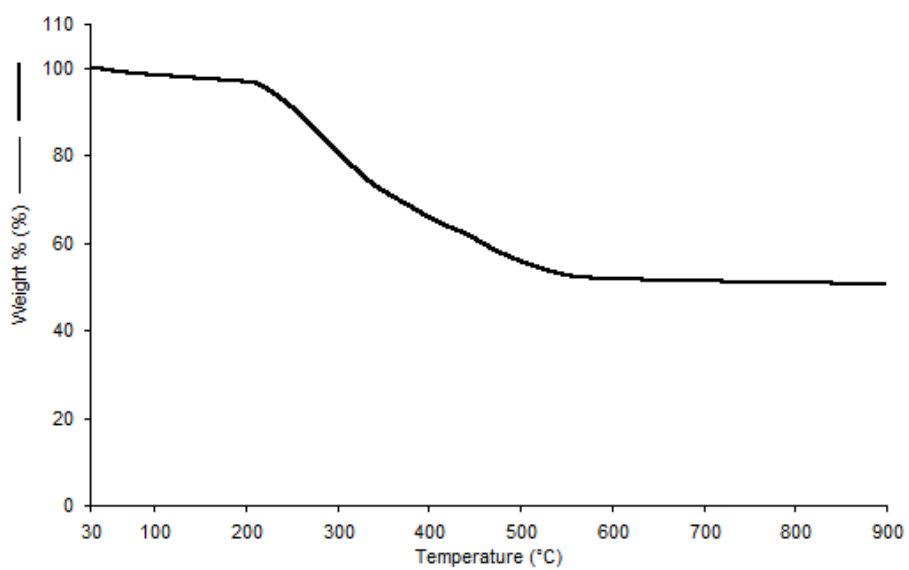

**Fig. S41.** TG spectrum of freshly prepared NHC-Rh coordination assembly **6a**.

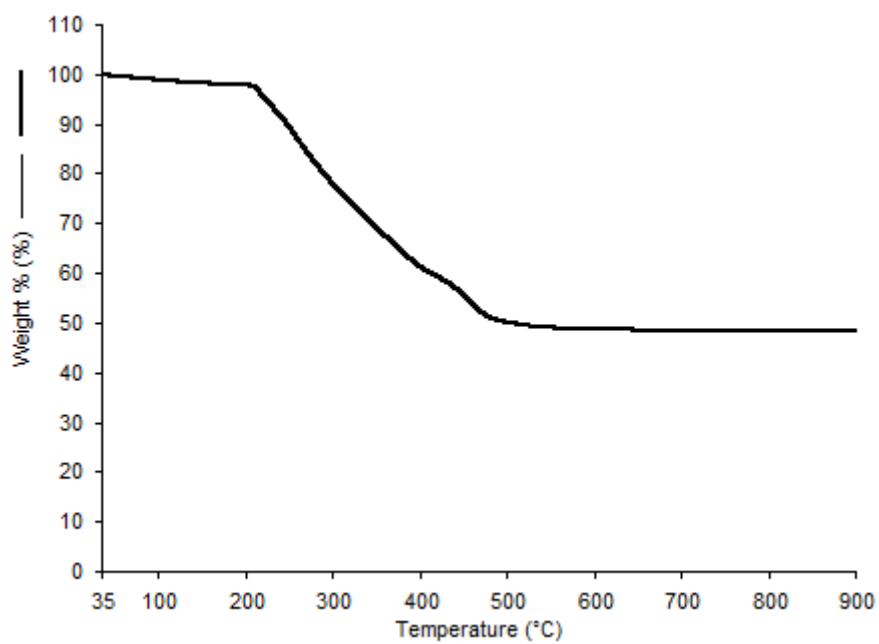

**Fig. S42.** TG spectrum of freshly prepared NHC-Rh coordination assembly **6b**.

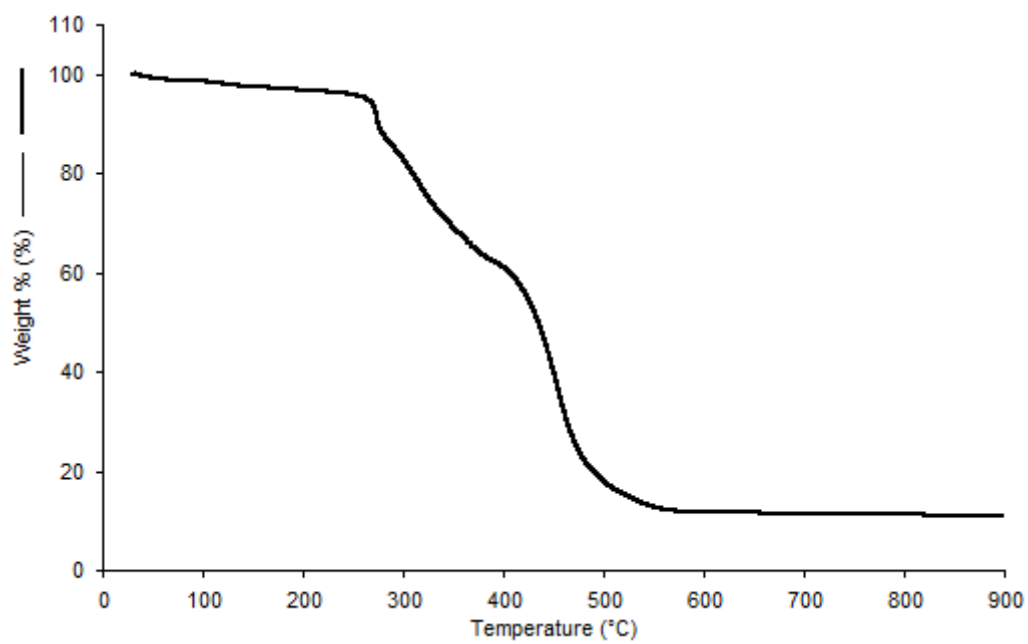

**Fig. S43.** TG spectrum of freshly prepared NHC-Rh coordination assembly **6c**.



6.6 N<sub>2</sub> sorption isotherm of NHC-Rh coordination assembly 6b

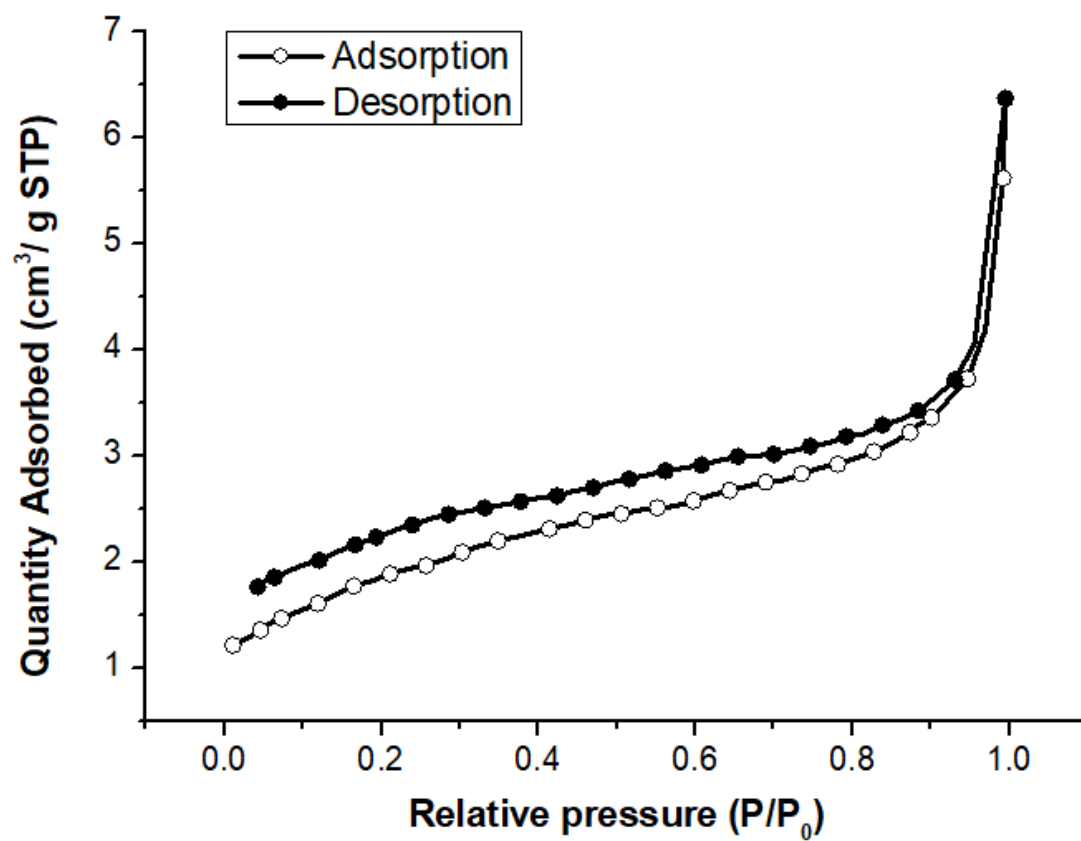

Fig. S44. N<sub>2</sub> sorption isotherm of NHC-Rh coordination assembly 6b.

## 7. XANES, $k^2$ -weighted EXAFS & Gel permeation chromatography studies

Table S2. The best-fitted EXAFS results of Rh sample <sup>a</sup>

| Sample    | Shell | CN  | R(Å) | $\sigma^2 (10^{-2} \text{ \AA}^2)$ | $\Delta E_0$ (eV) | r-factor (%) |
|-----------|-------|-----|------|------------------------------------|-------------------|--------------|
| Rh foil   | Rh-Rh | 12  | 2.69 | 0.4                                | -7.1              | 2            |
| Solid 6b  | Rh-C  | 3.1 | 2.11 | 0.05                               | -5.1              |              |
| Rh sample | Rh-C  | 7.7 | 2.06 | 0.2                                | -9.9              | 0.4          |

<sup>a</sup> CN is the coordination number for the absorber-backscatterer pair, R is the average absorber-backscatterer distance,  $\sigma^2$  is the Debye-Waller factor, and  $\Delta E_0$  is the inner potential correction. The accuracies of the above parameters are estimated as CN,  $\pm 20\%$ ; R,  $\pm 1\%$ ;  $\sigma^2$ ,  $\pm 20\%$ ;  $\Delta E_0$ ,  $\pm 20\%$ . The data range used for data fitting in k-space ( $\Delta k$ ) and R-space ( $\Delta R$ ) are 3.0-13.6  $\text{\AA}^{-1}$  and 1.0-1.9  $\text{\AA}$ , respectively.

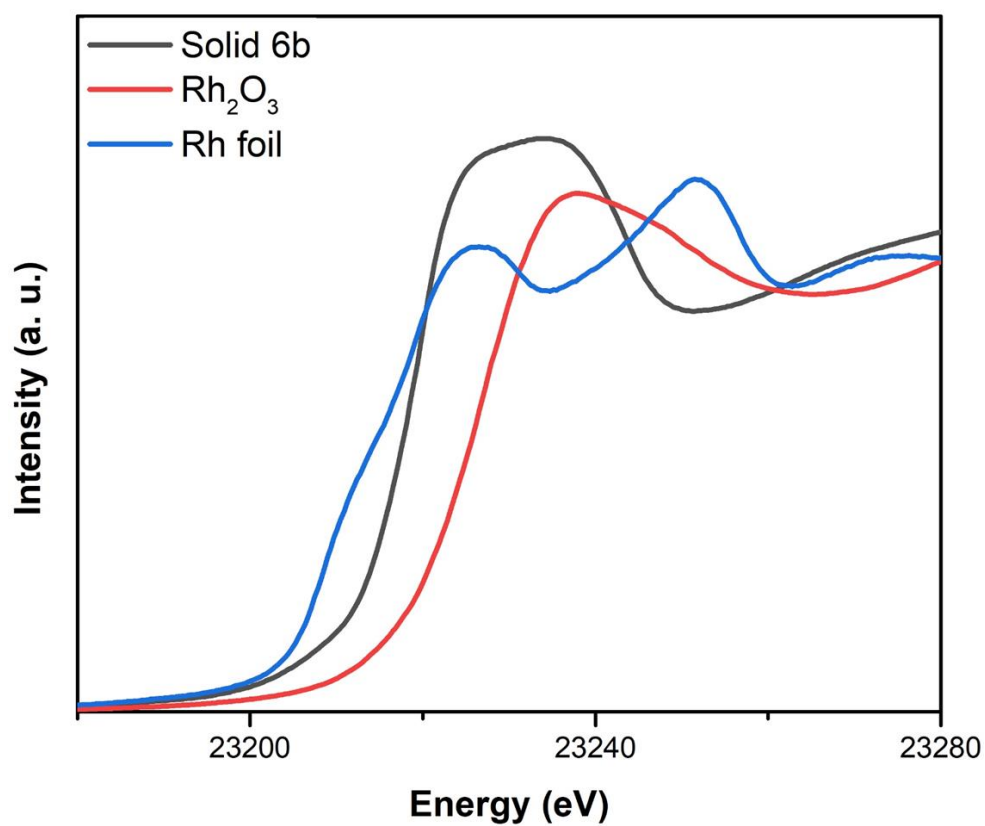

Fig. S45. The normalized XANES spectra at the Rh K-edge of the solid **6b**, Rh<sub>2</sub>O<sub>3</sub> and Rh foil.

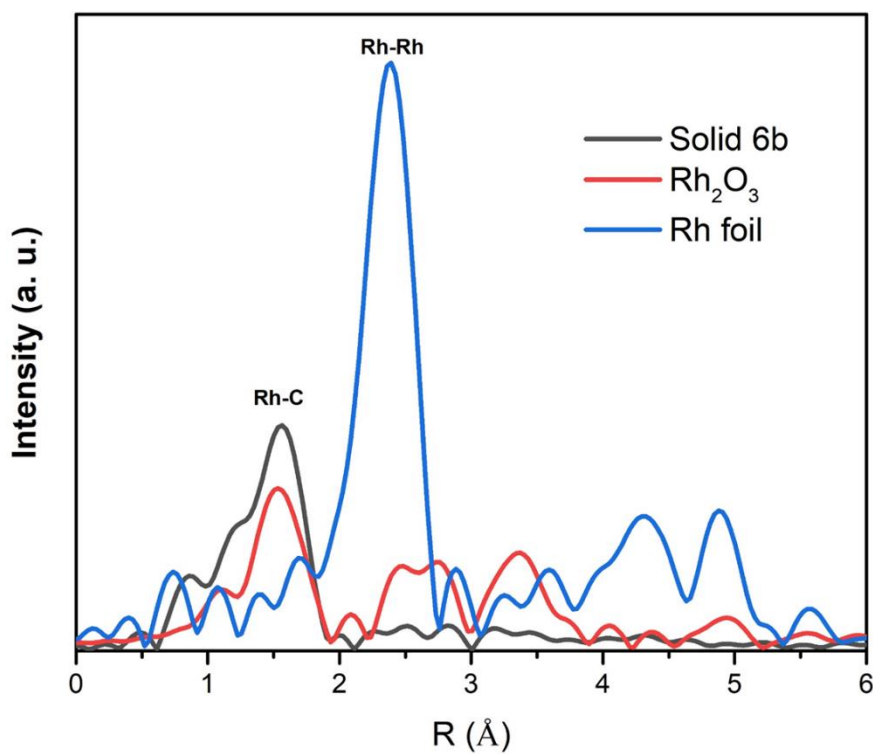

Fig. S46. The Fourier transform of  $k^2$ -weighted EXAFS spectra at the K-edge of the solid **6b**, Rh<sub>2</sub>O<sub>3</sub> and Rh foil

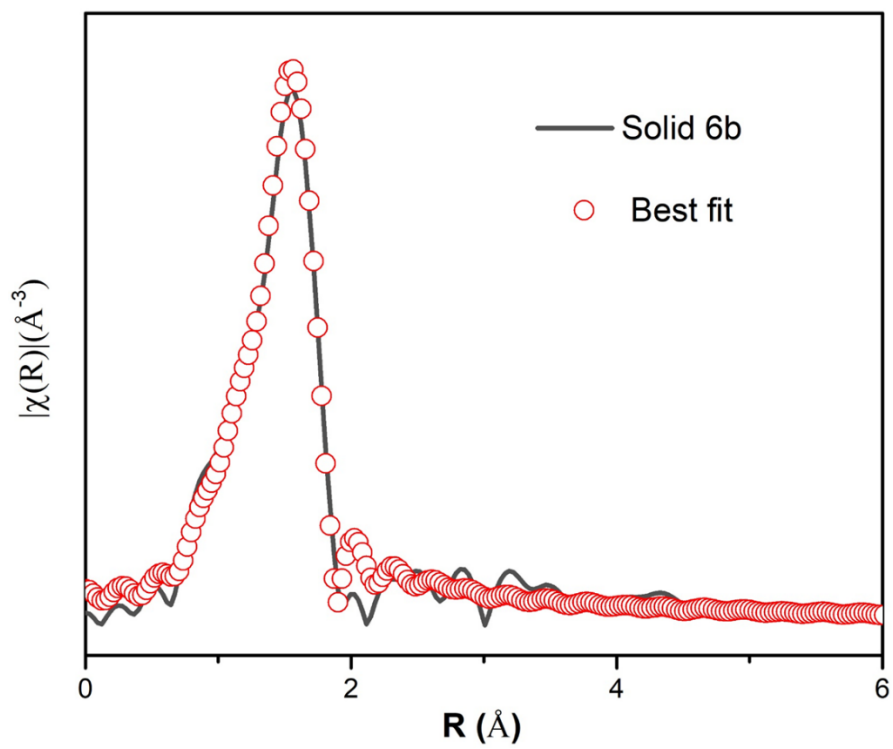

**Fig. S47.** The experimental Rh EXAFS spectra (black line) and the fitting curve of solid **6b** (red line)

## 8. Gel permeation chromatography (GPC) Study

Due to its insolubility of solid NHC-Rh coordination assembly **6b** even in hot DMF or DMSO, we performed GPC analysis on its oligomer **6b'**, which was prepared with bis-NHC ligand and rhodium precursor in a ratio of 20:21 under the otherwise identical preparation method. The obtained solid could be partially dissolved in hot DMSO, which make it is possible to be measured by GPC.

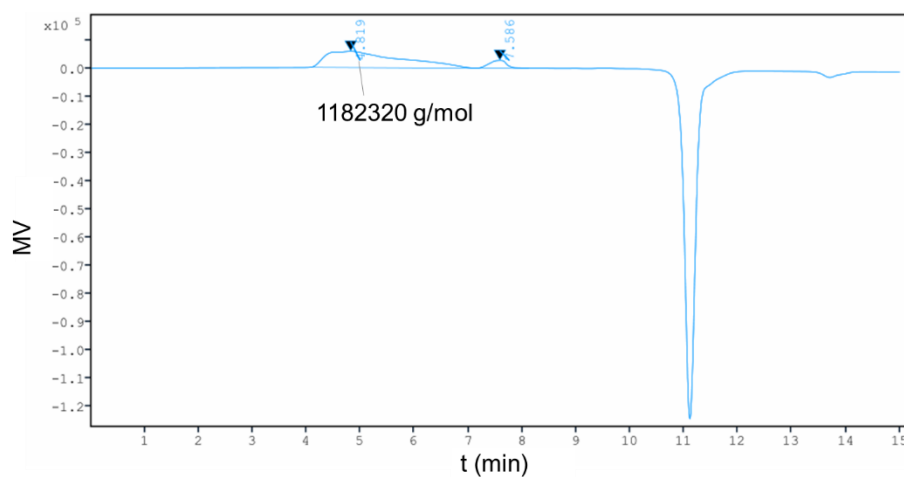

| GPC result |       |         |         |         |              |              |
|------------|-------|---------|---------|---------|--------------|--------------|
|            | RT    |         | Mn      | Mw      | Mz           | Mz+1         |
| 1          | 4.819 | 8908501 | 1182320 | 9190058 | 246960<br>17 | 357195<br>46 |
| 2          | 7.586 | 45451   | 46756   | 49486   | 52078        | 54576        |

Fig. S48. GPC result of NHC-Rh coordination assembly **6b'**.

## 9. Metal-leaching tests with ICP-AES

**Table S3.** Rhodium leaching tests with the filtrates of the reaction mixture after consecutive runs<sup>a</sup>.

| [Cat.]    | Run | Conc. of Rh (mg/L) |
|-----------|-----|--------------------|
| <b>6b</b> | 1   | 0.0856             |
| <b>6b</b> | 2   | 0.0741             |
| <b>6b</b> | 3   | 0.0631             |
| <b>6b</b> | 7   | <0.03              |
| <b>6b</b> | 10  | <0.03              |
| <b>6b</b> | 14  | <0.03              |
| <b>6b</b> | 18  | <0.03              |

<sup>a</sup> ICP-AES analysis of the reaction filtrates after each consecutive run (reaction was carried at 1 mmol scale with 1 mol % **6b**). After filtration, the recovered catalyst was washed with 10 mL methanol and 10 mL dichloromethane then separated with centrifuging. After full volatilization of the dichloromethane at r.t, the residue was diluted to 500 mL as an alkaline or higher concentration will both cause a flameout of ICP-AES. The corresponding amount of Rh in the original mixture is  $0.5 \times$  the concentration measured with ICP-AES (mg).

**Table S4. Substrate scope of olefins and amines <sup>a</sup>**

Extremely bulky 2, 6-diisopropyl-*N*-methylaniline was selected as the amine substrate, no corresponding amine product was detected. We have applied propene as the smallest olefin in our study, one of the most important substrates in industry, the corresponding amine **9ma-2** was still produced 84% yield with 95/5 selectivity, demonstrating the high efficiency of our strategy. When *N,N*-dimethylamine, with better nucleophilicity than aromatic amines, was applied, no corresponding product was obtained.

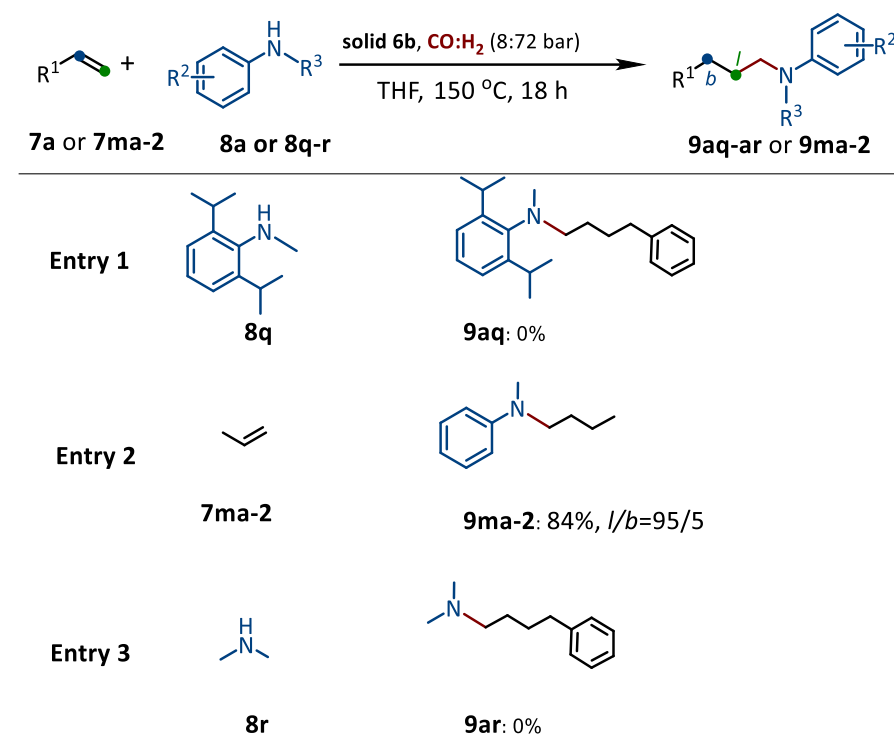

<sup>a</sup> Reaction conditions: 1.25 mmol olefin, 0.5 mmol amine, 1 mol % solid catalyst **6b**, 4.0 mL THF, CO:H<sub>2</sub> (80 bar, 1:9), 150 °C, 18 h (All yields reported are isolated yields and regioselectivities were determined by <sup>1</sup>H NMR of the crude reaction mixture)

## 10. $^1\text{H}$ , $^{13}\text{C}$ and $^{19}\text{F}$ NMR spectra

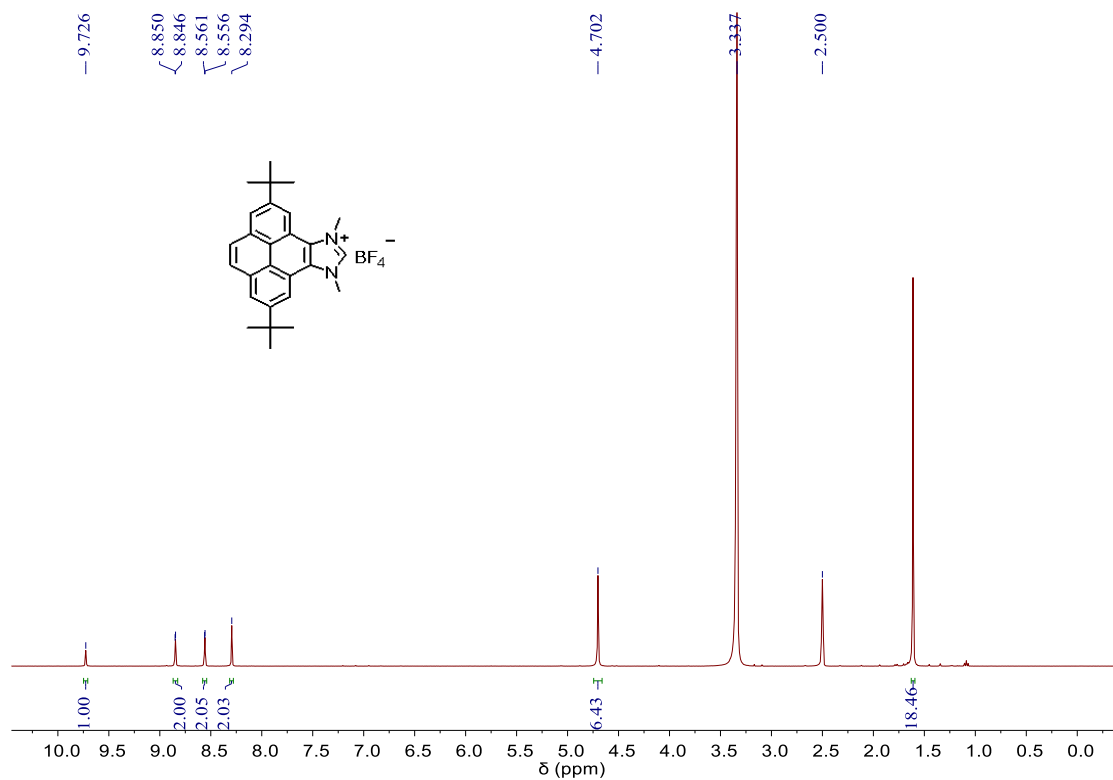

Fig. S49.  $^1\text{H}$  NMR (400 MHz,  $\text{DMSO-}d_6$ , 298 K) spectrum of compound S3.

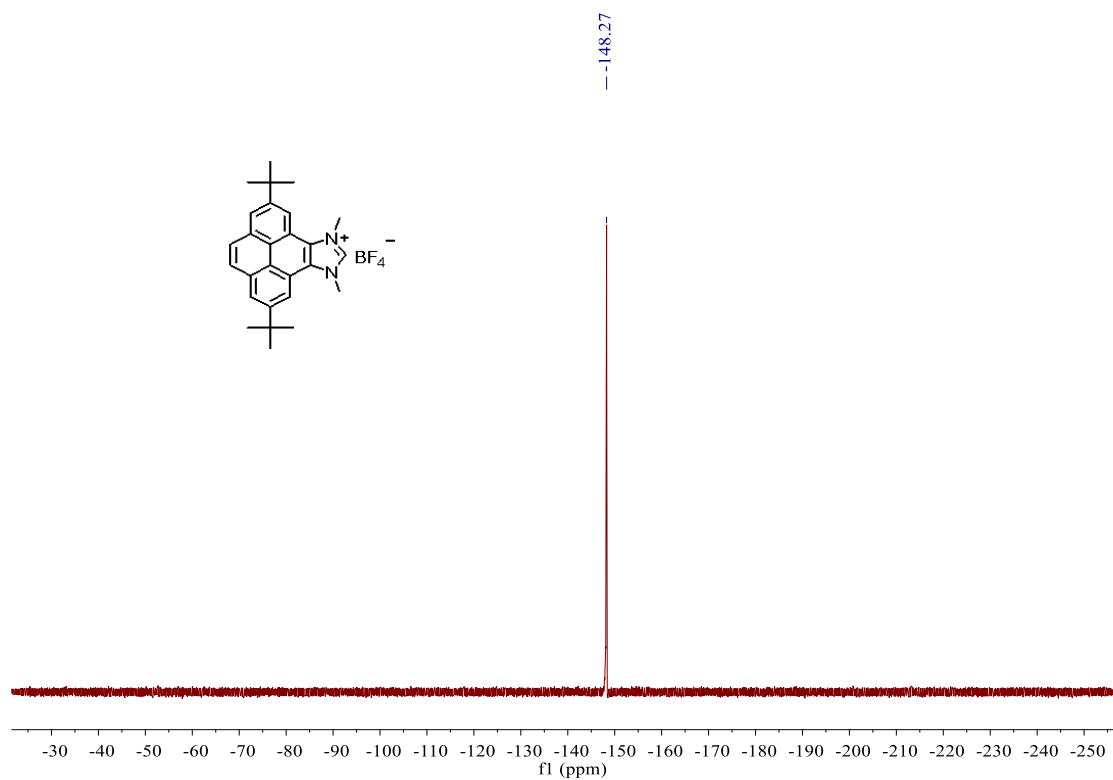

Fig. S50.  $^{19}\text{F}$  NMR (376 MHz,  $\text{DMSO-}d_6$ , 298 K) spectrum of compound S3.



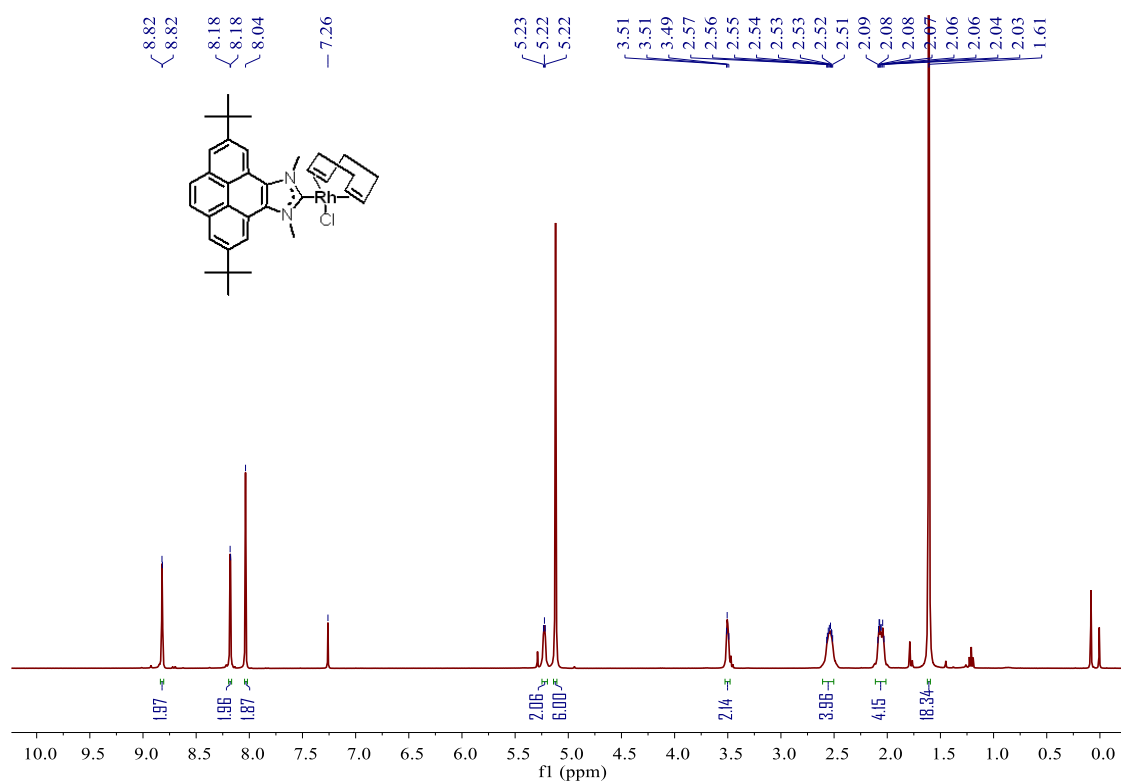

**Fig. S51.** <sup>1</sup>H NMR (400 MHz, CDCl<sub>3</sub>, 298 K) spectrum of NHC-Rh complex **1**.

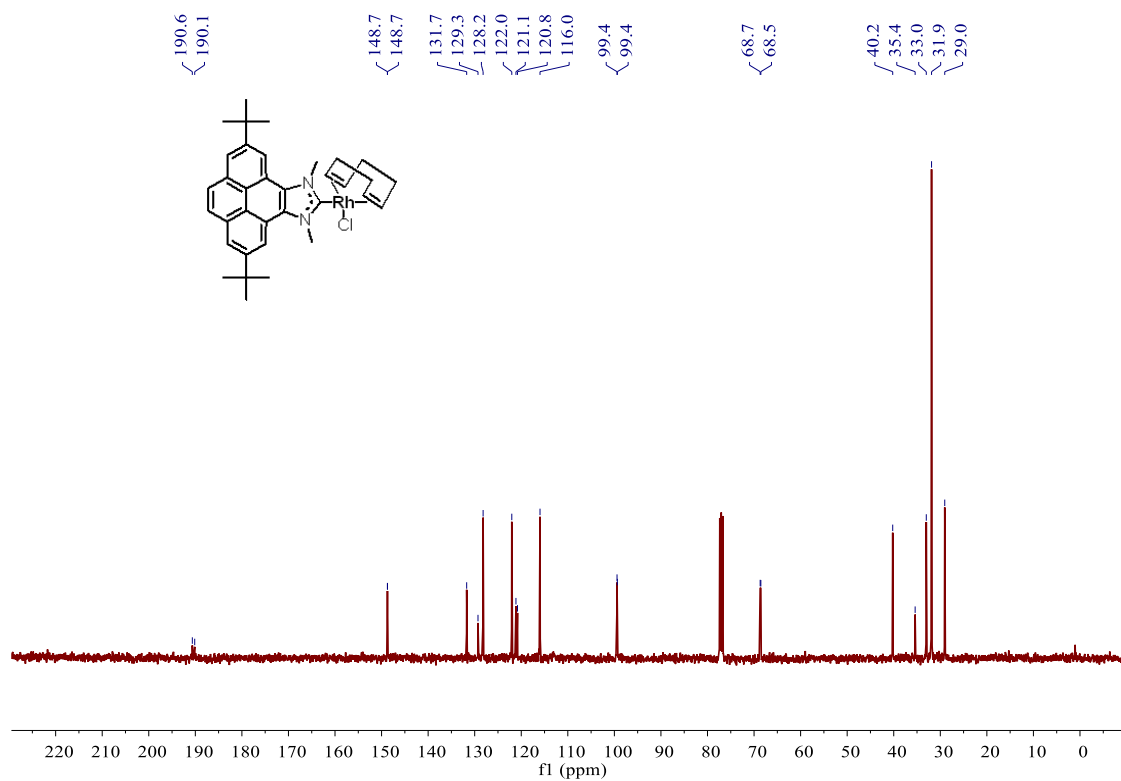

**Fig. S52.** <sup>13</sup>C NMR (101 MHz, CDCl<sub>3</sub>, 298 K) spectrum of NHC-Rh complex **1**.

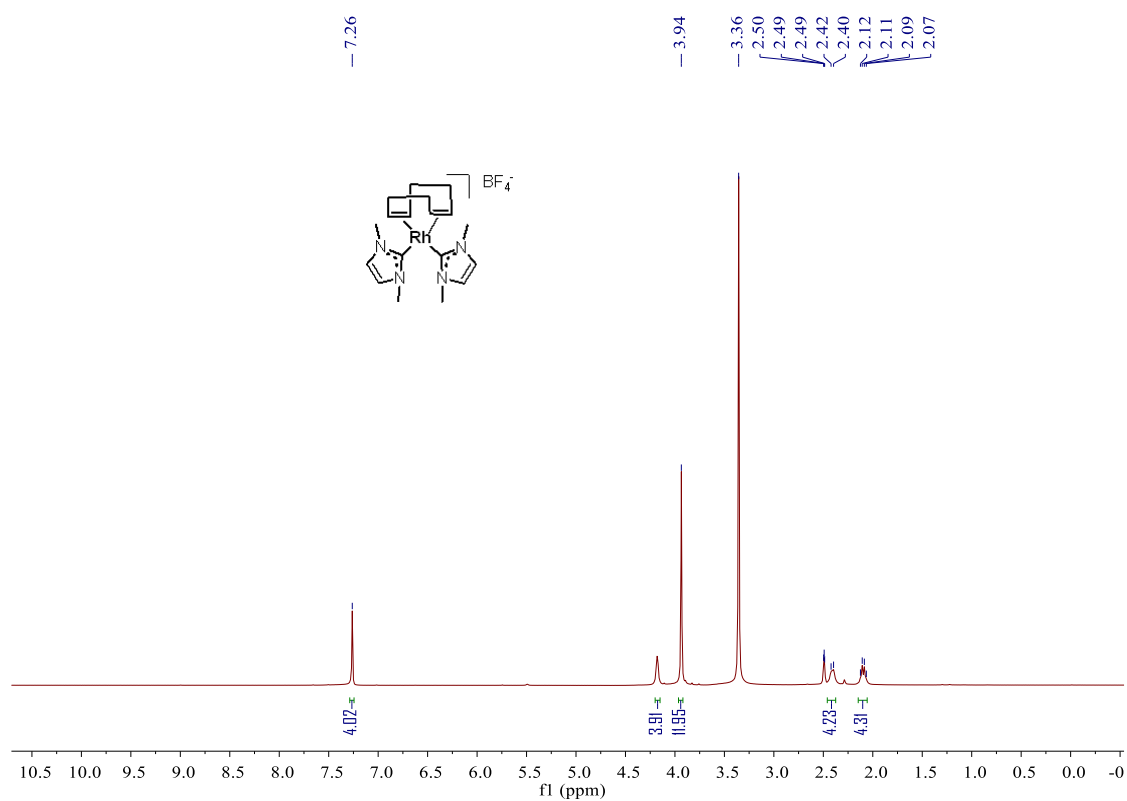

**Fig. S53.**  $^1\text{H}$  NMR (400 MHz,  $\text{DMSO-}d_6$ , 298 K) spectrum of NHC-Rh complex 2.

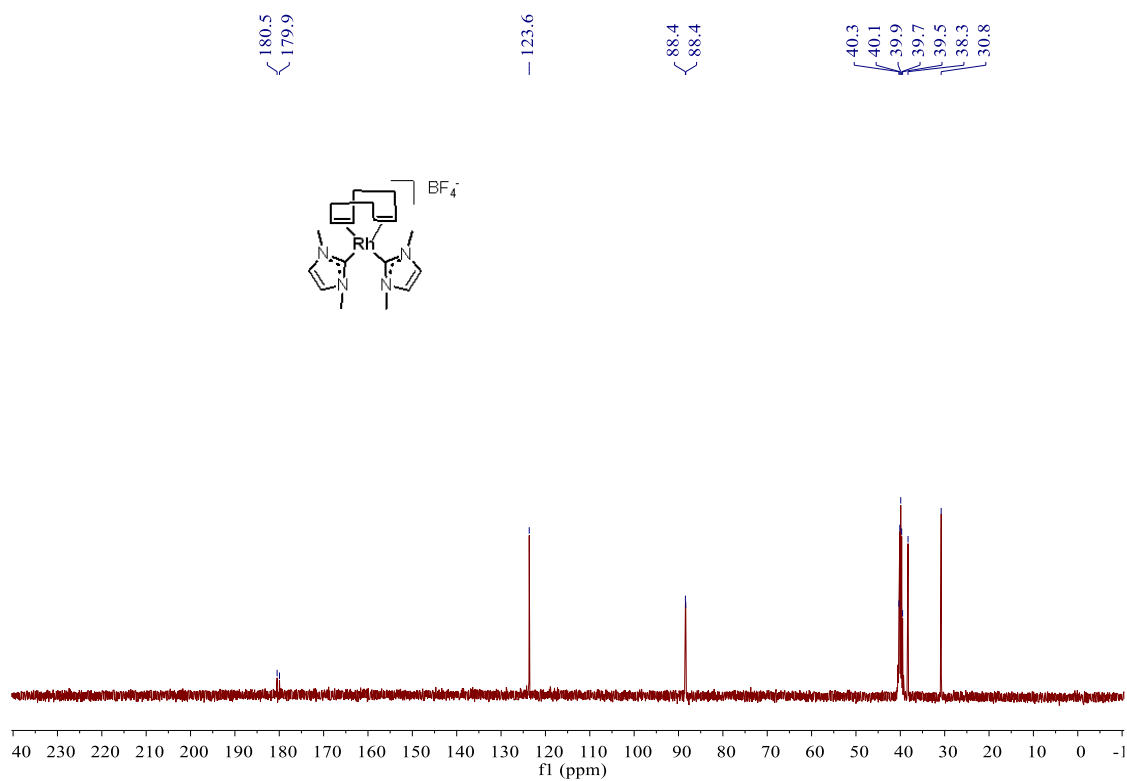

**Fig. S54.**  $^{13}\text{C}$  NMR (101 MHz,  $\text{DMSO-}d_6$ , 298 K) spectrum of NHC-Rh complex 2.

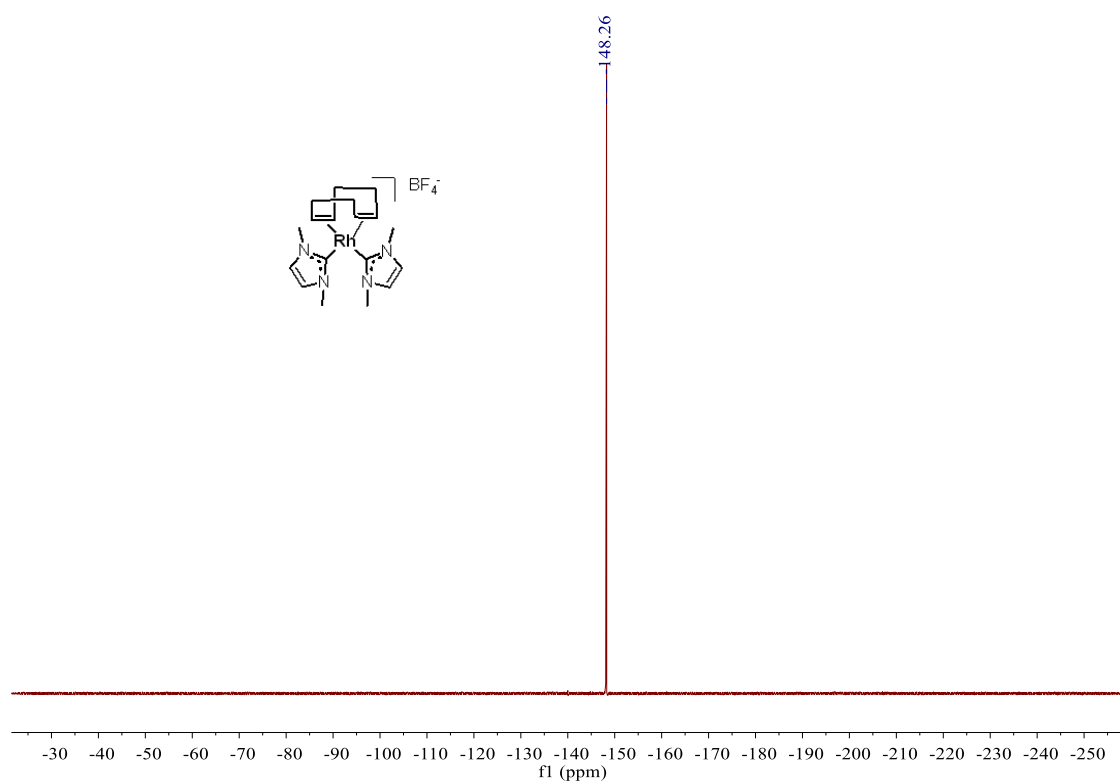

**Fig. S55.**  $^{19}\text{F}$  NMR (376 MHz,  $\text{DMSO-}d_6$ , 298 K) spectrum of NHC-Rh complex 2.

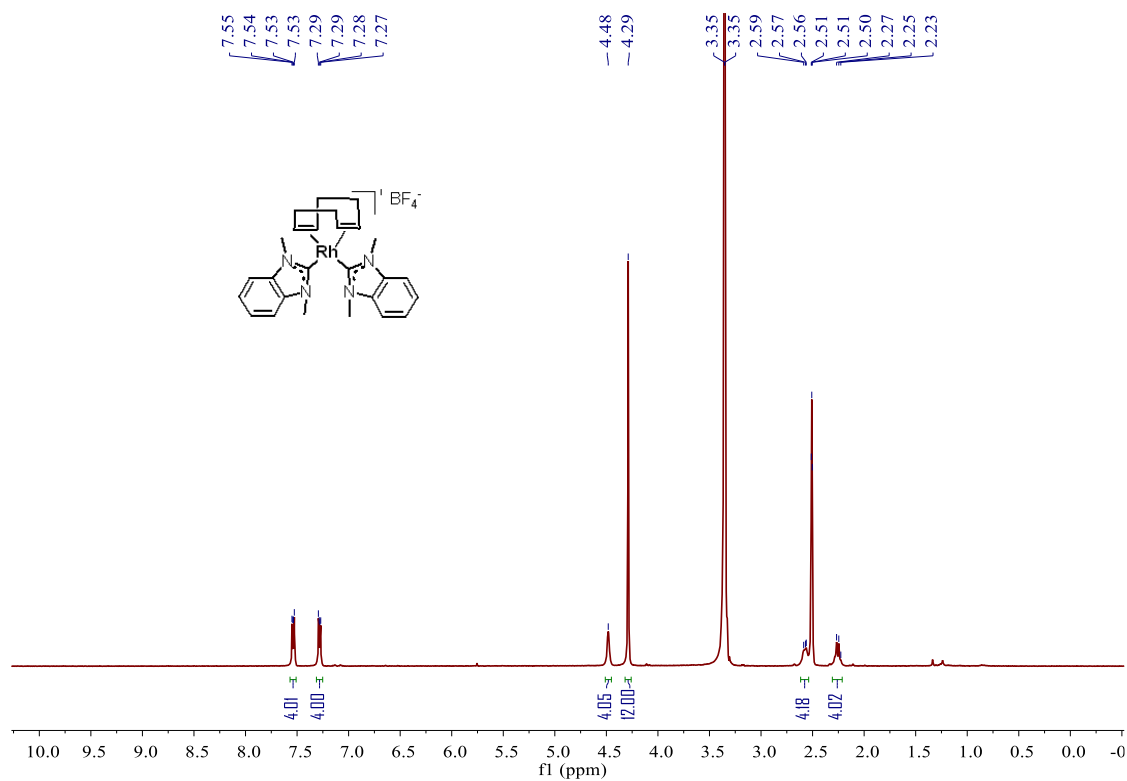

**Fig. S56.**  $^1\text{H}$  NMR (400 MHz,  $\text{DMSO-}d_6$ , 298 K) spectrum of NHC-Rh complex 3.

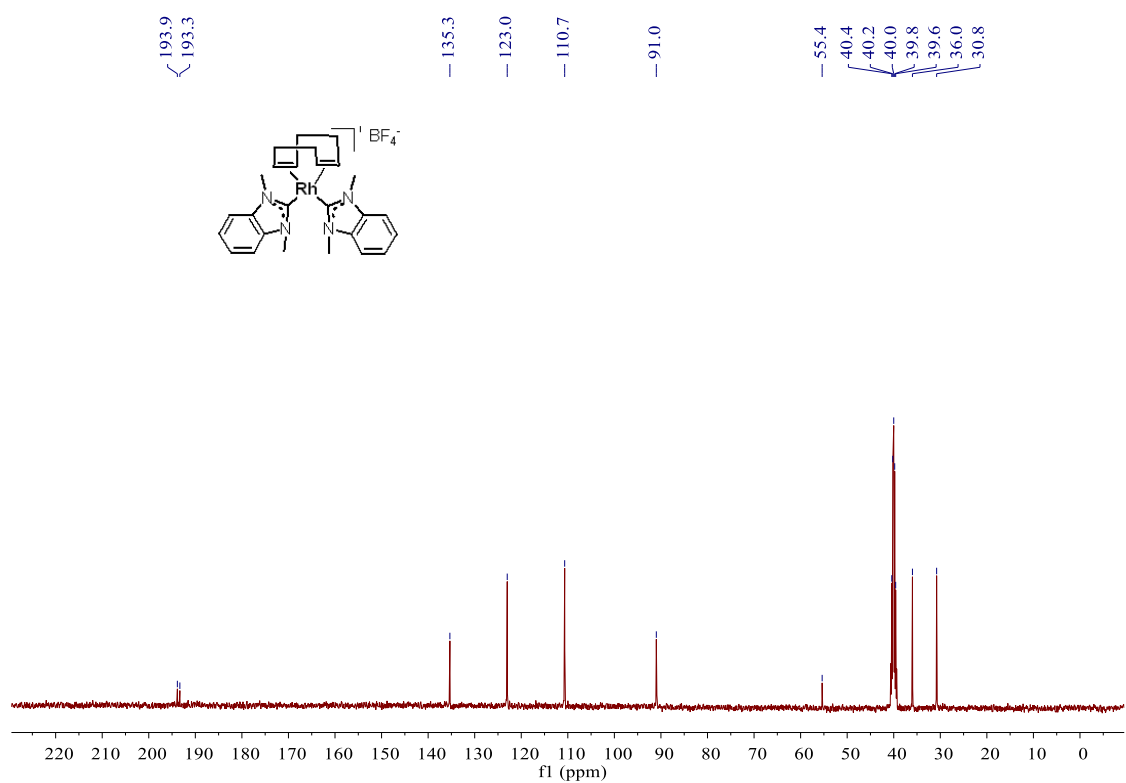

**Fig. S57.**  $^{13}\text{C}$  NMR (101 MHz,  $\text{DMSO-}d_6$ , 298 K) spectrum of NHC-Rh complex **3**.

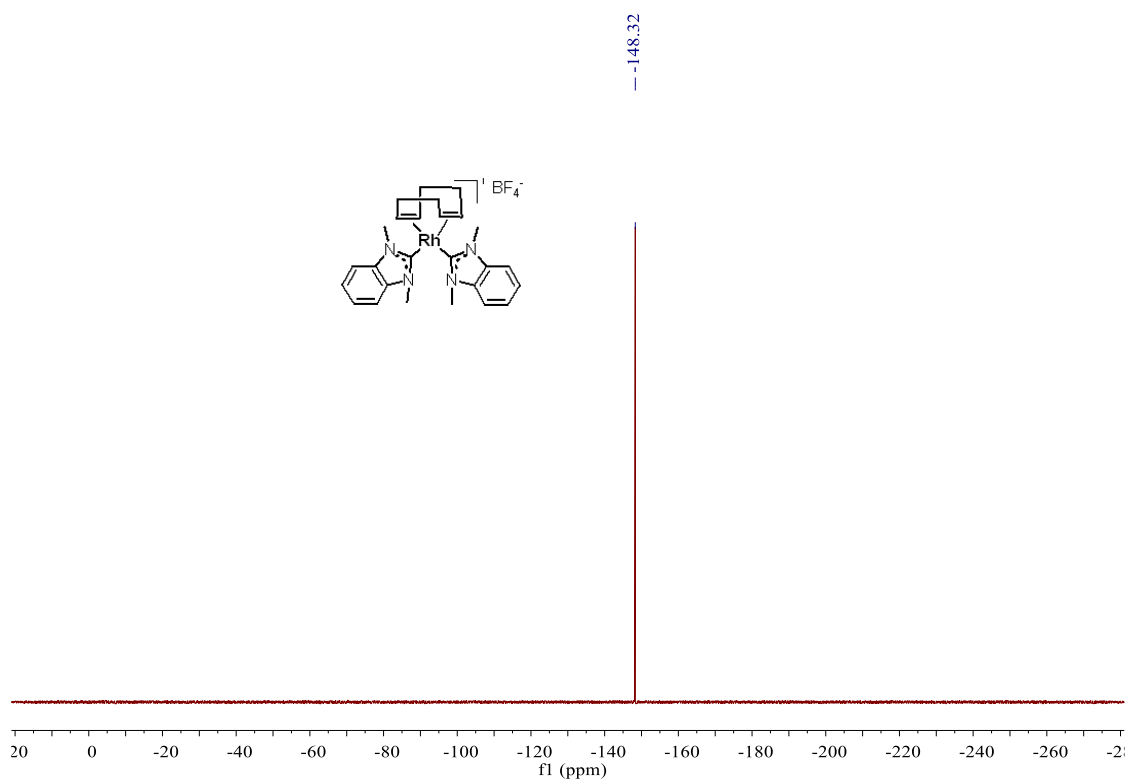

**Fig. S58.**  $^{19}\text{F}$  NMR (376 MHz,  $\text{DMSO-}d_6$ , 298 K) spectrum of NHC-Rh complex **3**.

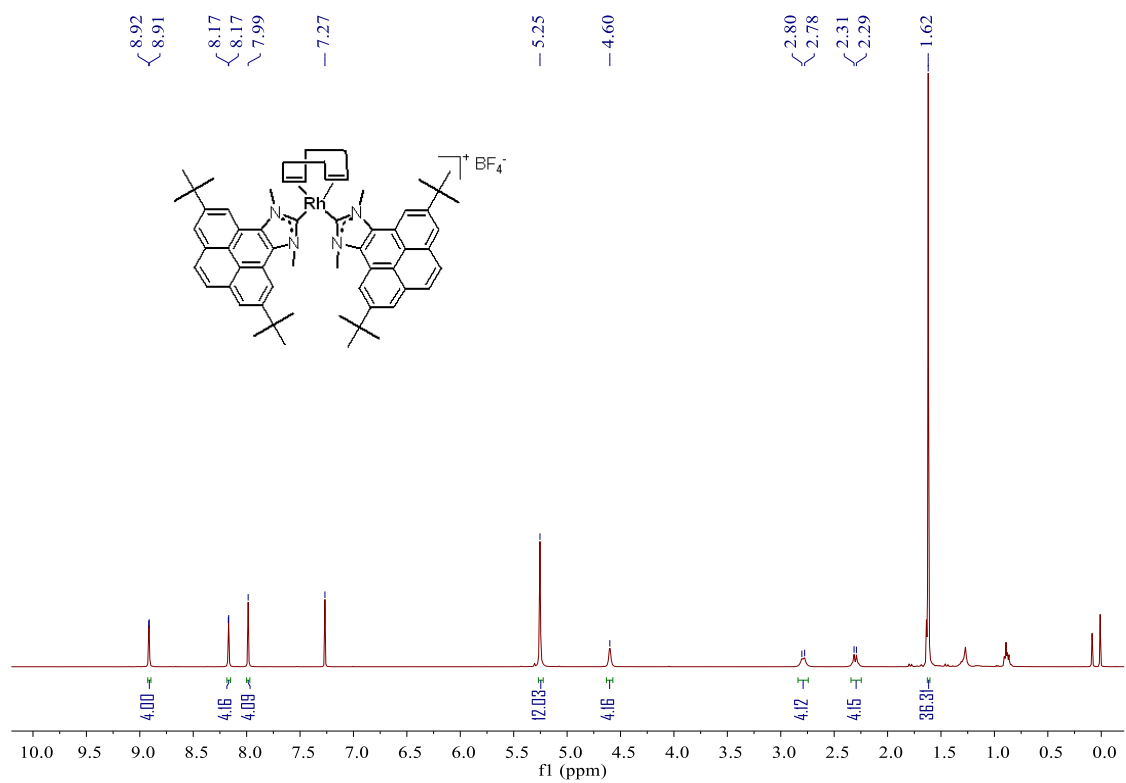

**Fig. S59.**  $^1\text{H}$  NMR (400 MHz,  $\text{CDCl}_3$ , 298 K) spectrum of NHC-Rh complex **4b**.

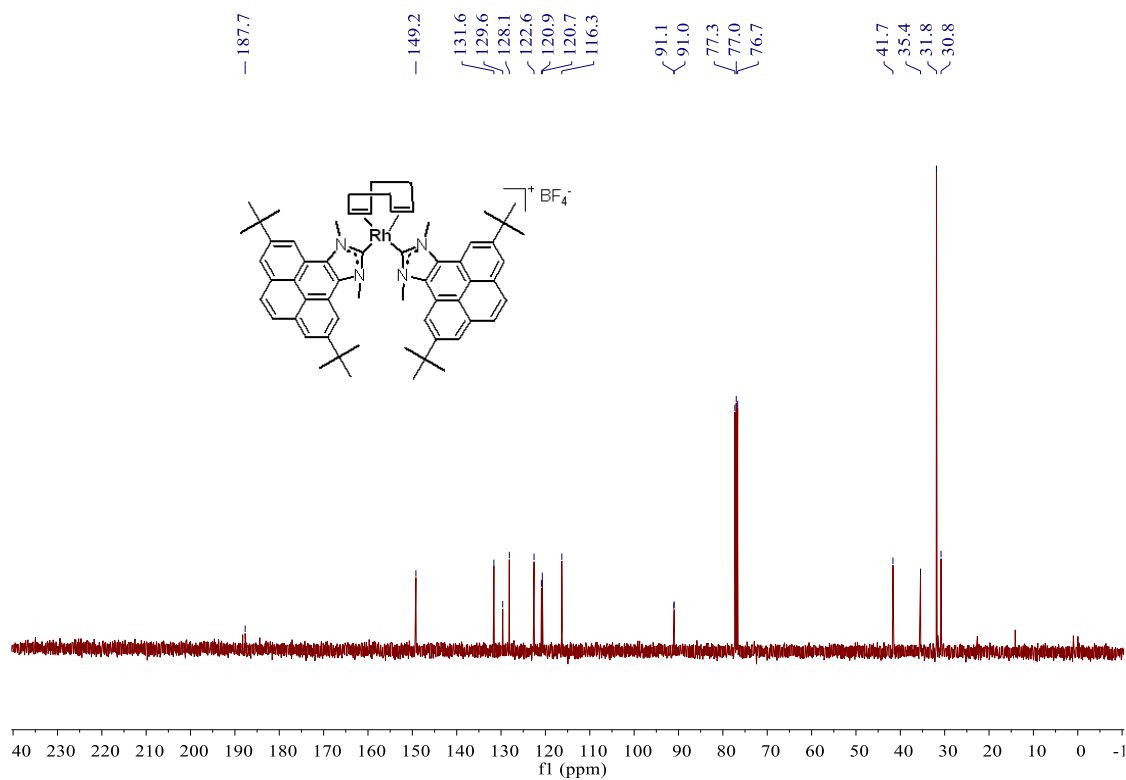

**Fig. S60.**  $^{13}\text{C}$  NMR (101 MHz,  $\text{CDCl}_3$ , 298 K) spectrum of spectrum of NHC-Rh complex **4b**.

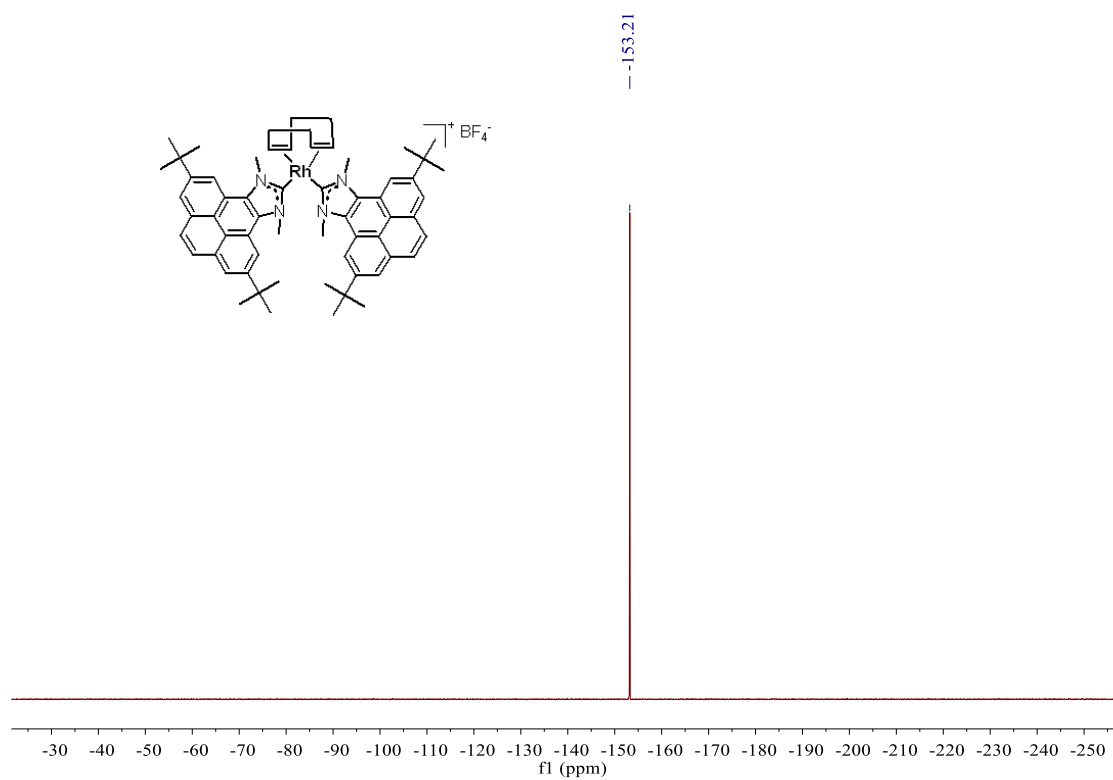

**Fig. S61.**  $^{19}\text{F}$  NMR (376 MHz,  $\text{CDCl}_3$ , 298 K) spectrum of NHC-Rh complex **4b**.

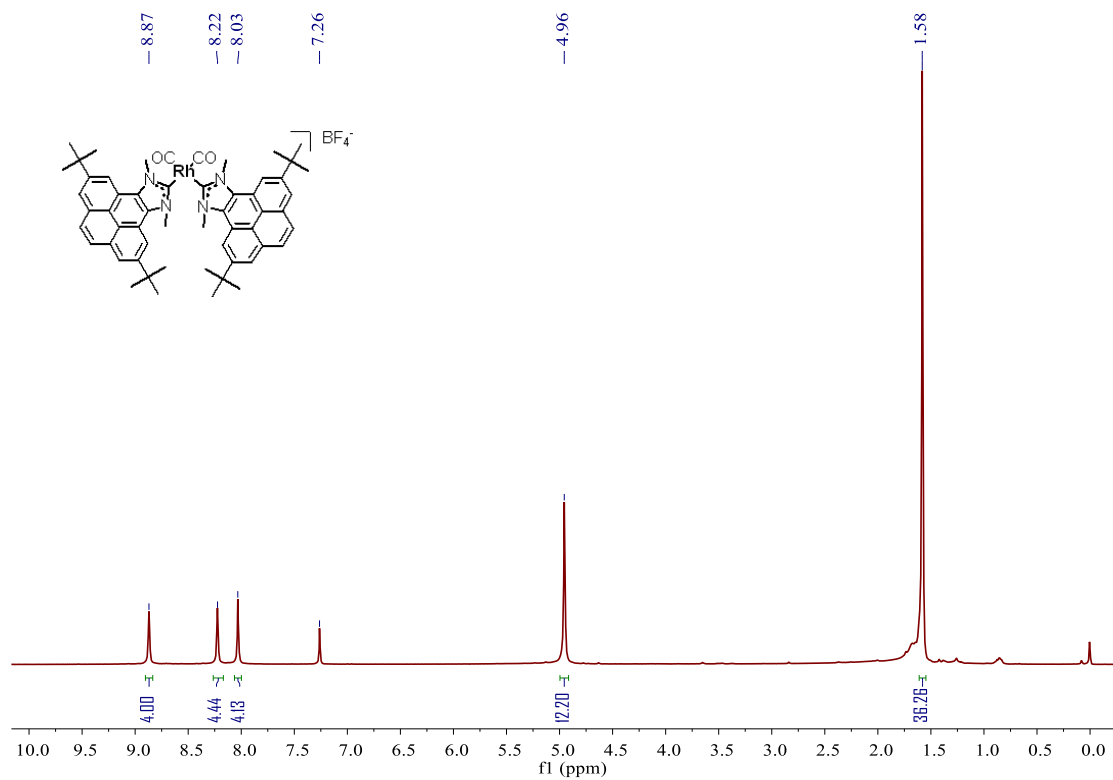

**Fig. S62.**  $^1\text{H}$  NMR (400 MHz,  $\text{CDCl}_3$ , 298 K) spectrum of NHC-Rh complex **4a**.

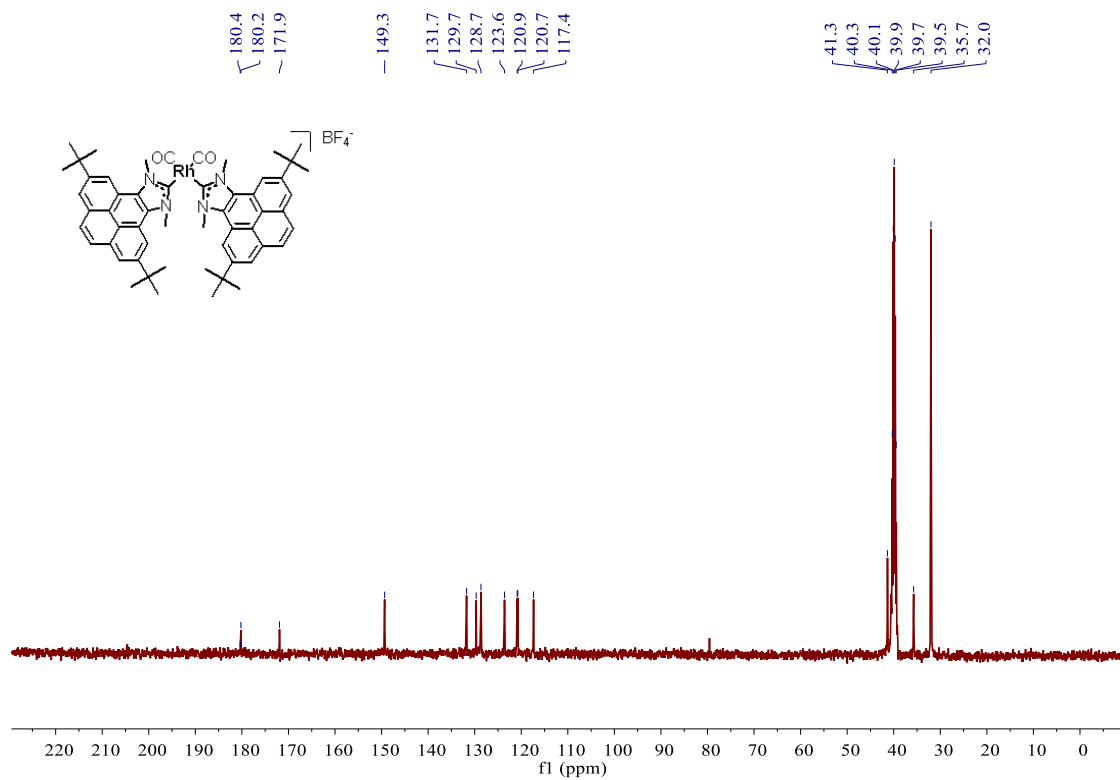

**Fig. S63.**  $^{13}\text{C}$  NMR (101 MHz,  $\text{DMSO-}d_6$ , 298 K) spectrum of spectrum of NHC-Rh complex 4a.

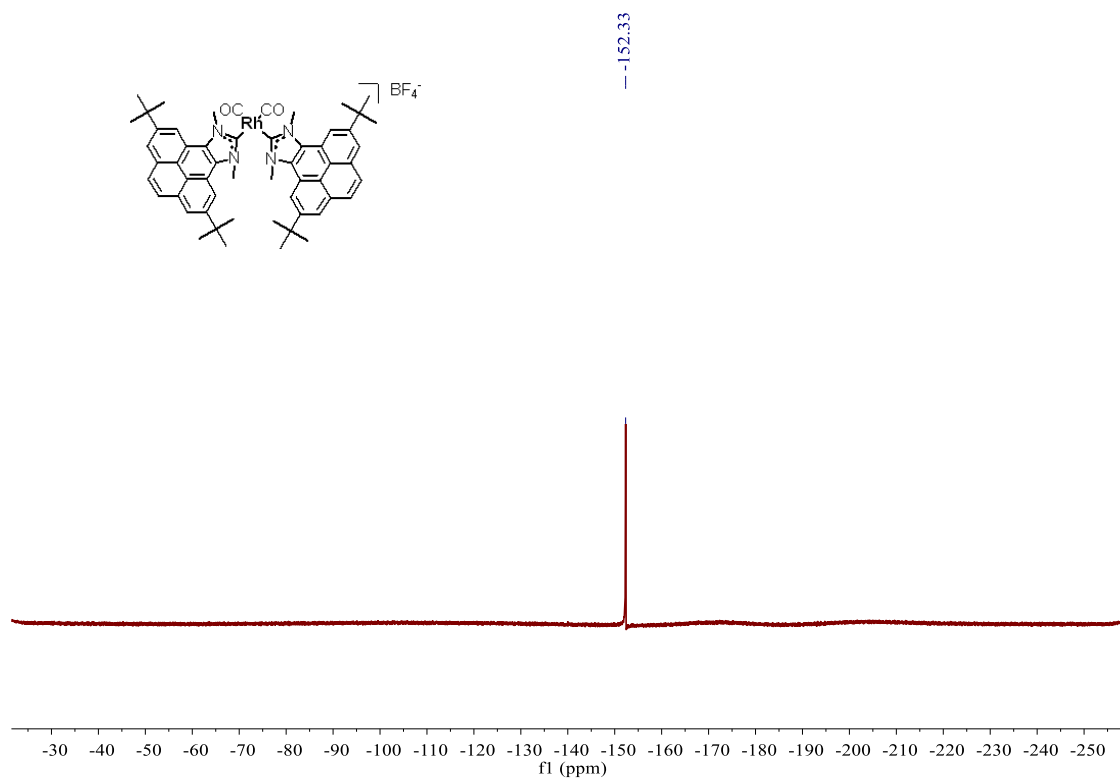

**Fig. S64.**  $^{19}\text{F}$  NMR (376 MHz,  $\text{CDCl}_3$ , 298 K) spectrum of NHC-Rh complex 4a.

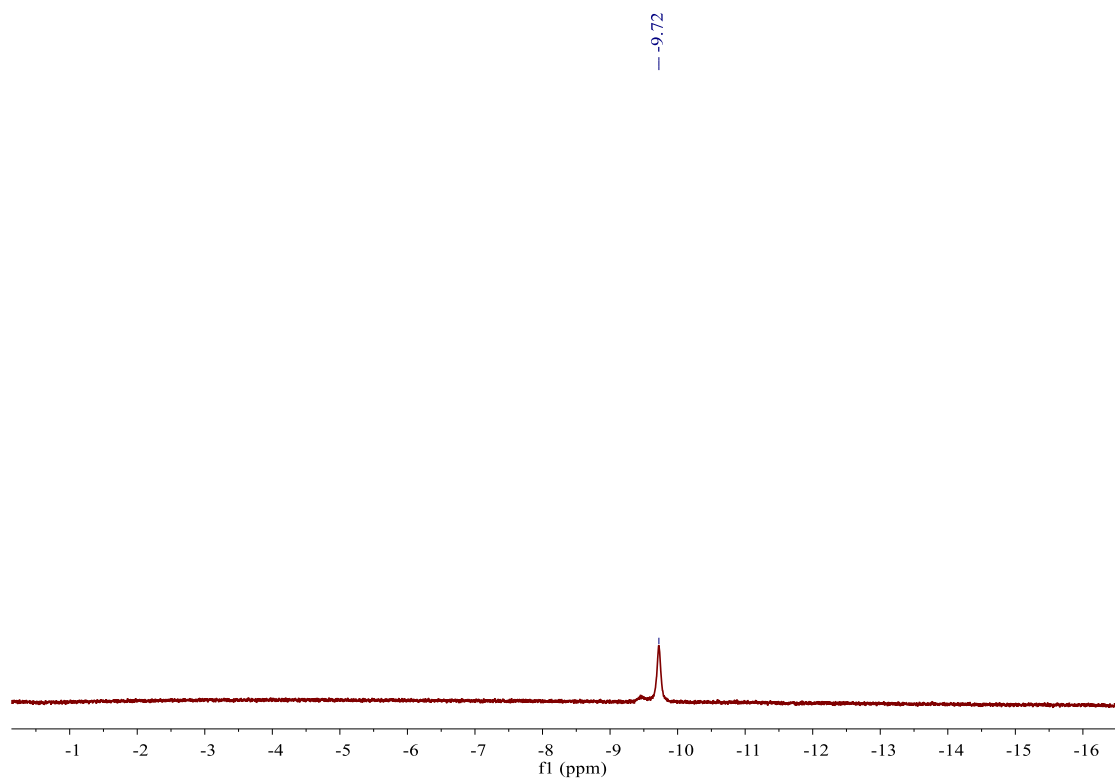

**Fig. S65.**  $^1\text{H}$  NMR (400 MHz,  $\text{CDCl}_3$ , 298 K) spectrum of Rh-H moieties.

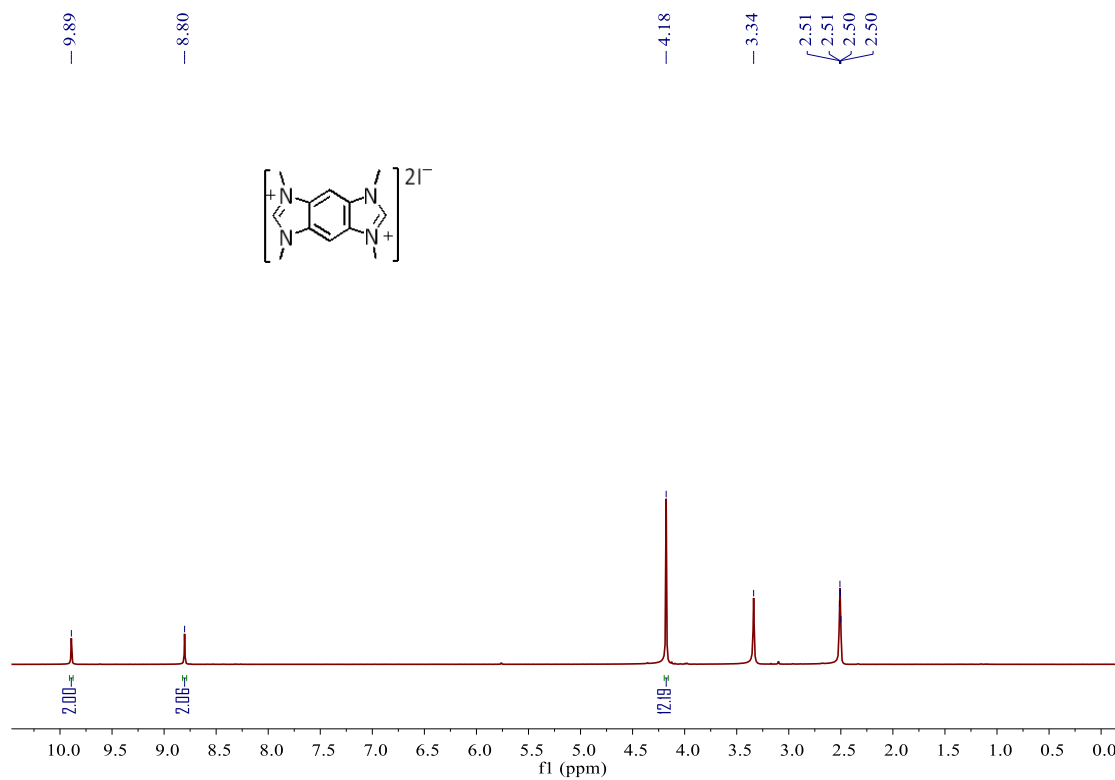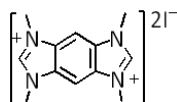

**Fig. S66.**  $^1\text{H}$  NMR (400 MHz,  $\text{DMSO-}d_6$ , 298 K) spectrum of compound S5.



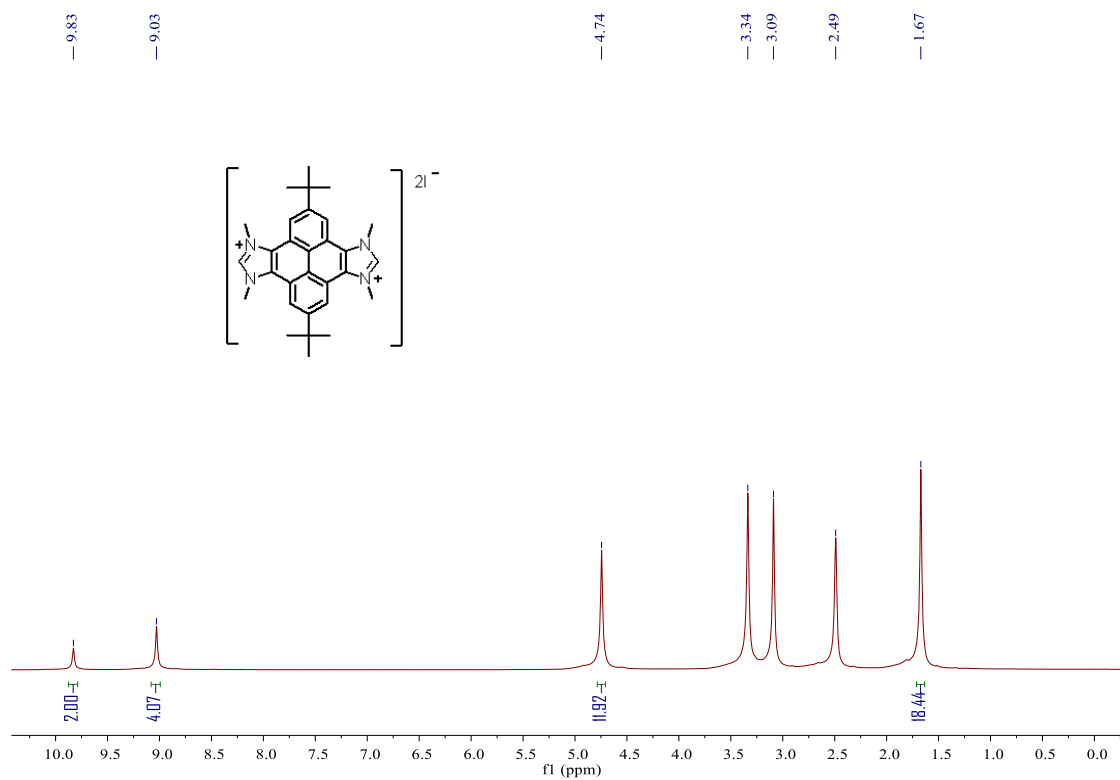

**Fig. S67.**  $^1\text{H}$  NMR (400 MHz,  $\text{DMSO-}d_6$ , 298 K) spectrum of compound **S6a**.

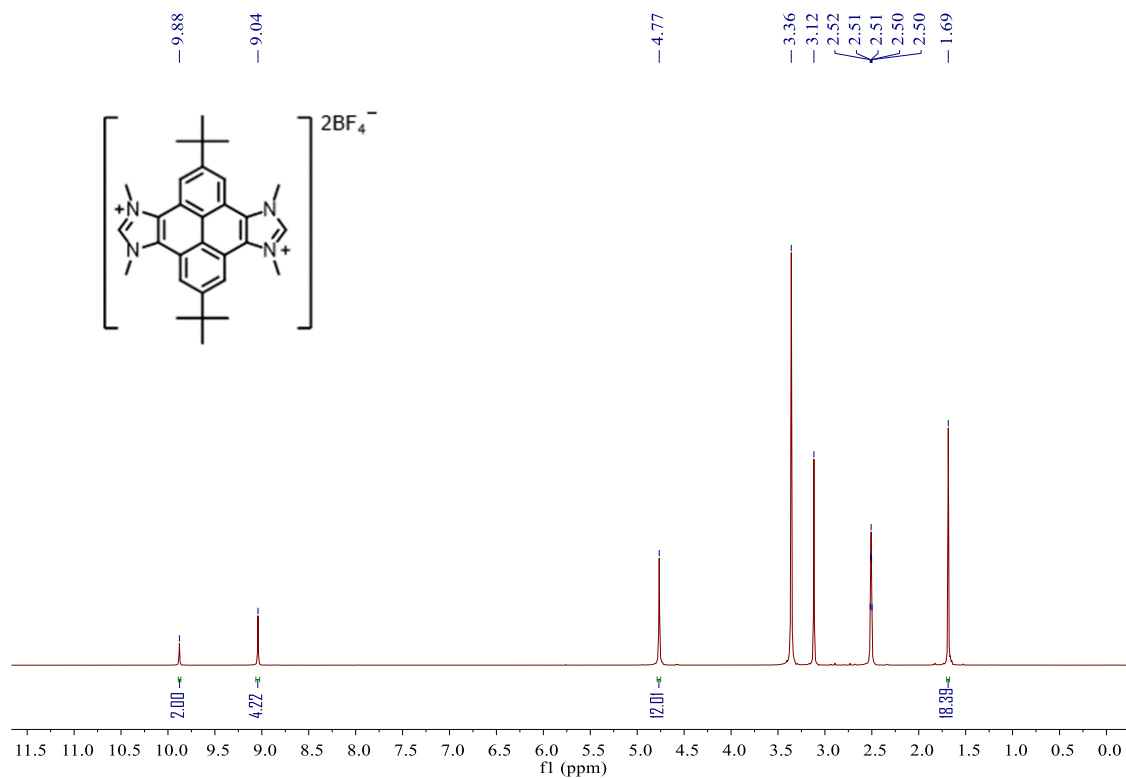

**Fig. S68.**  $^1\text{H}$  NMR (400 MHz,  $\text{DMSO-}d_6$ , 298 K) spectrum of compound **S6b**.

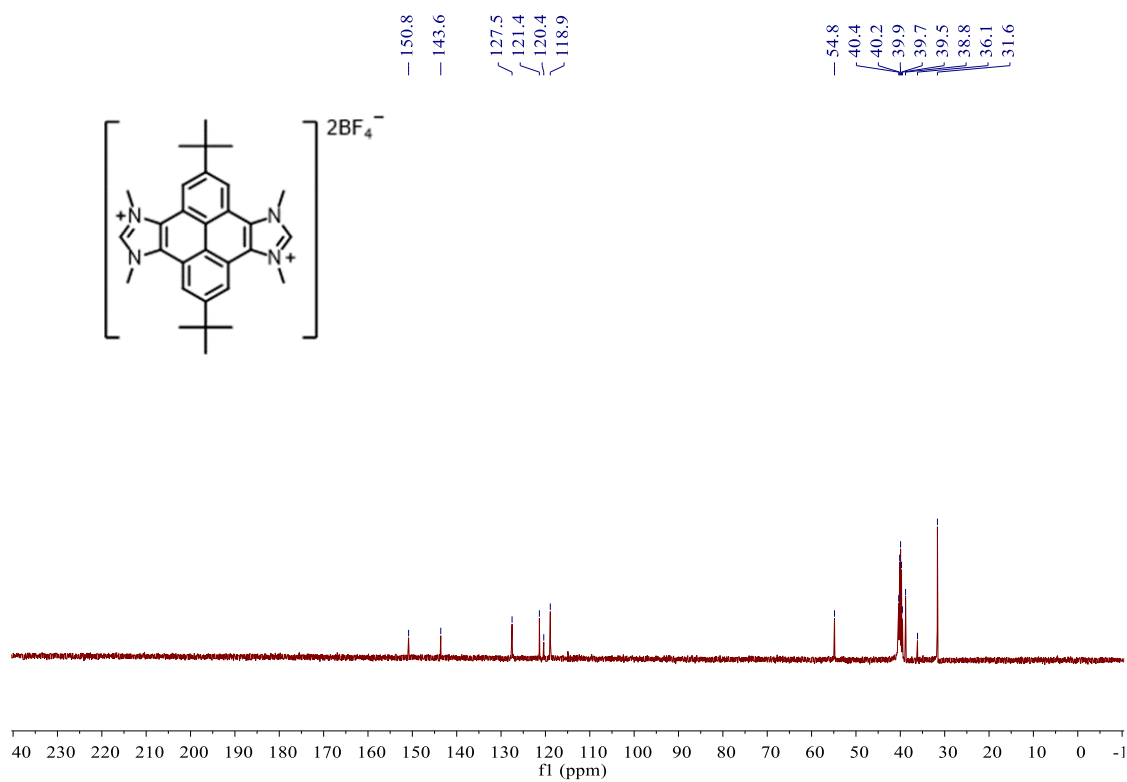

**Fig. S69.**  $^{13}\text{C}$  NMR (101 MHz,  $\text{DMSO}-d_6$ , 298 K) spectrum of compound **S6b**.

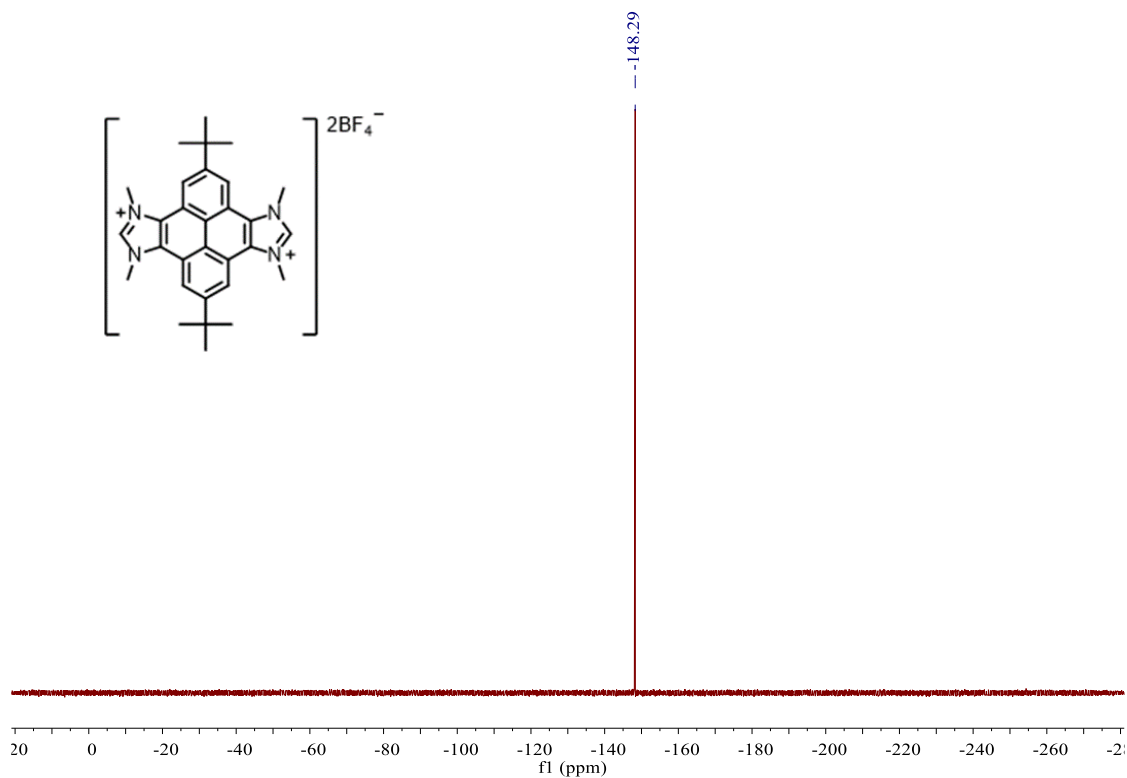

**Fig. S70.**  $^{19}\text{F}$  NMR (376 MHz,  $\text{DMSO}-d_6$ , 298 K) spectrum of compound **S6b**.

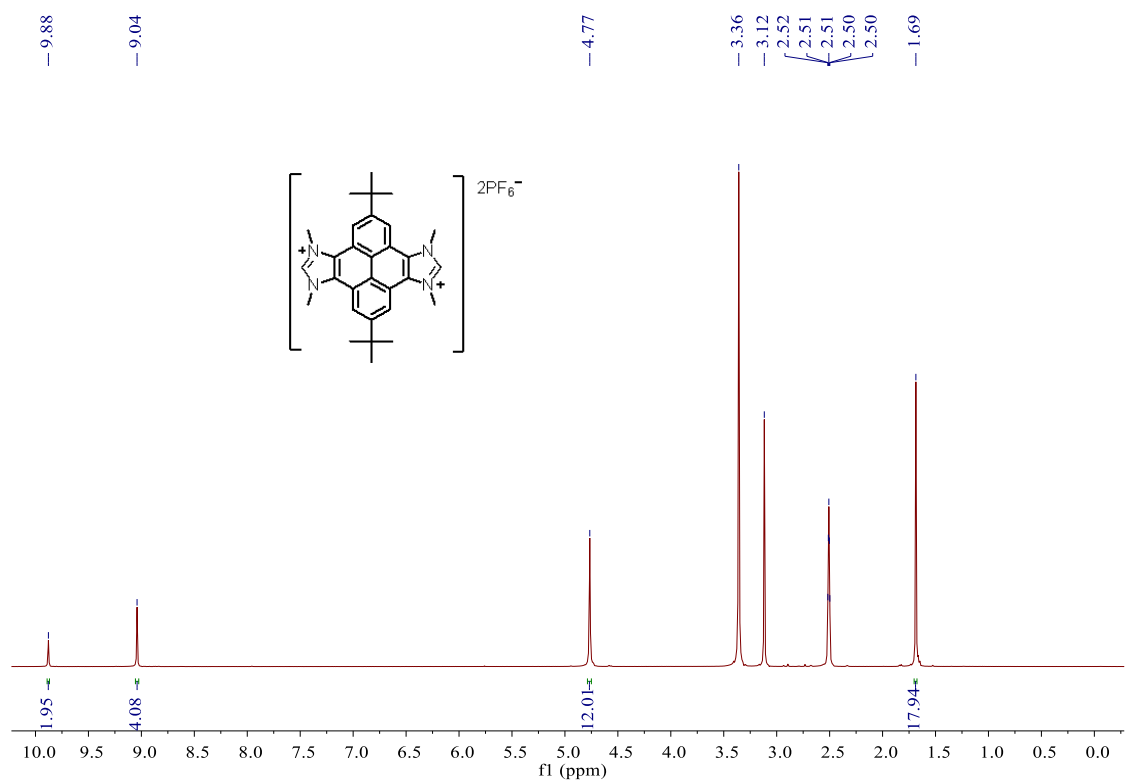

**Fig. S71.**  $^1\text{H}$  NMR (400 MHz,  $\text{DMSO-}d_6$ , 298 K) spectrum of compound **S6c**.

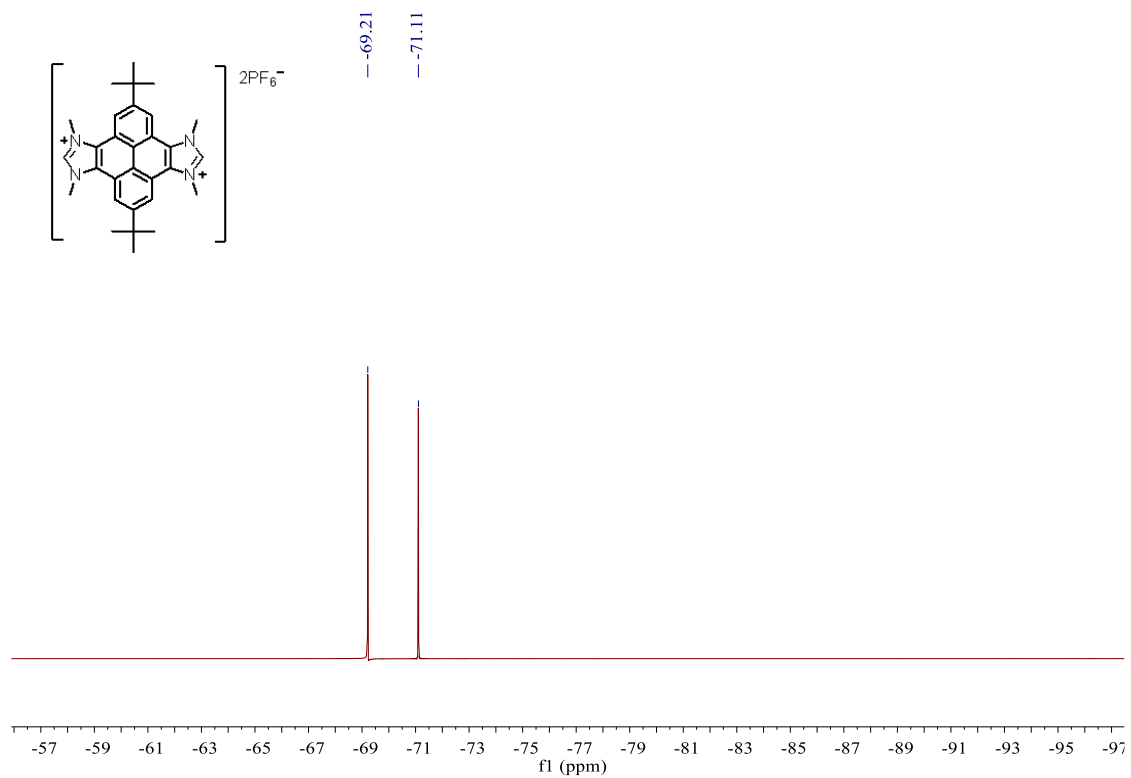

**Fig. S72.**  $^{19}\text{F}$  NMR (376 MHz,  $\text{DMSO-}d_6$ , 298 K) spectrum of compound **S6c**.

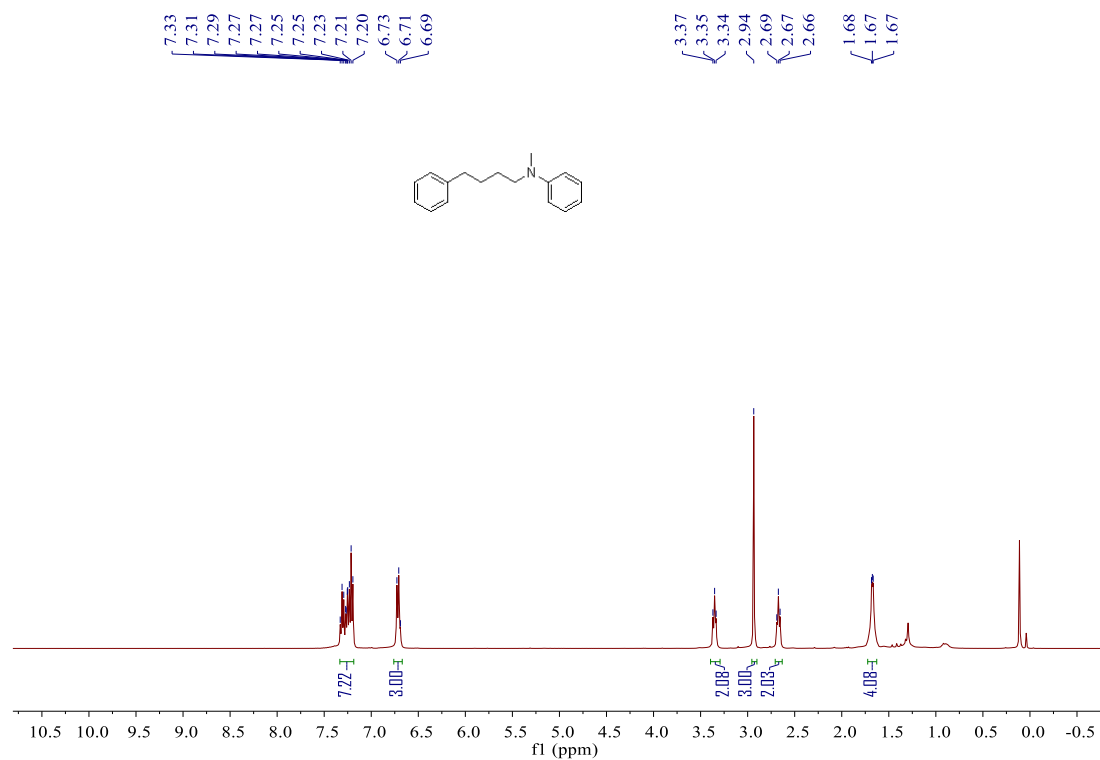

**Fig. S73.** <sup>1</sup>H NMR (400 MHz, CDCl<sub>3</sub>, 298 K) spectrum of compound **9aa**.

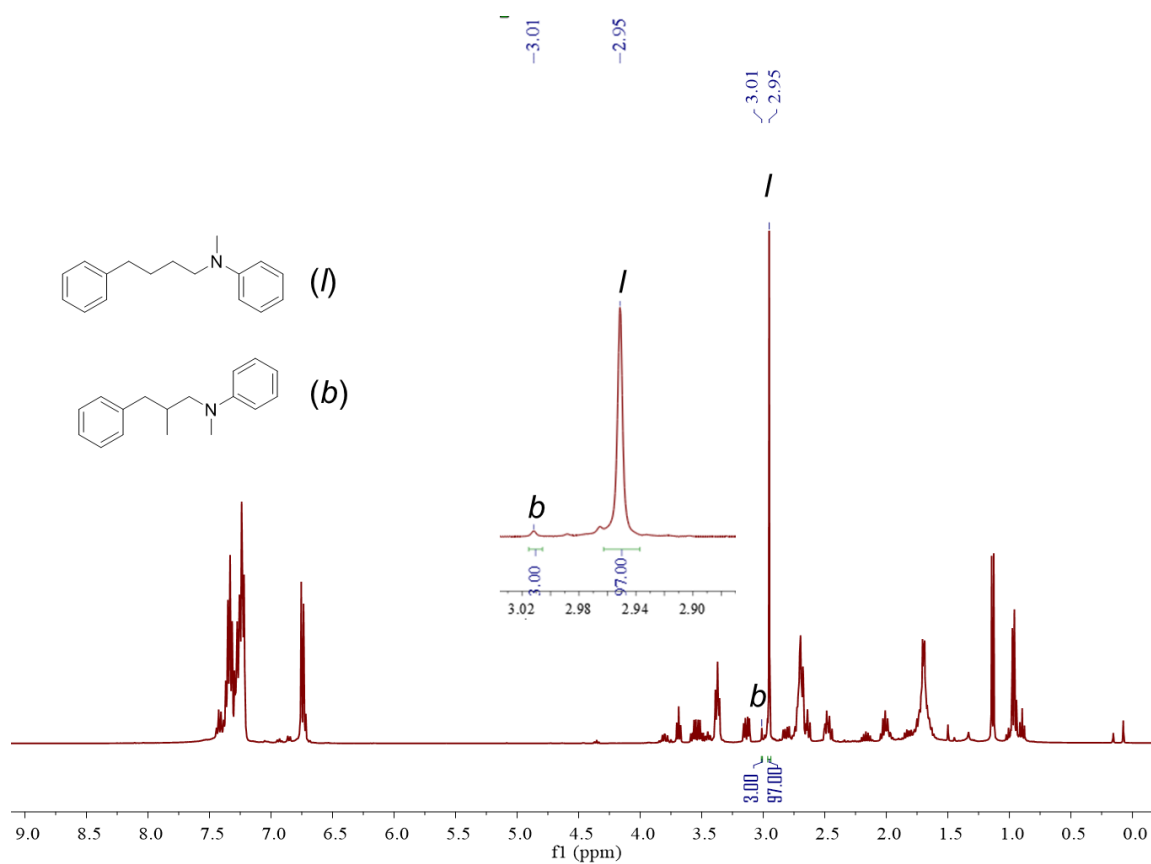

**Fig. S74.** <sup>1</sup>H NMR (400 MHz, CDCl<sub>3</sub>, 298 K) spectrum of reaction mixture after reaction competition to generate **9aa**.

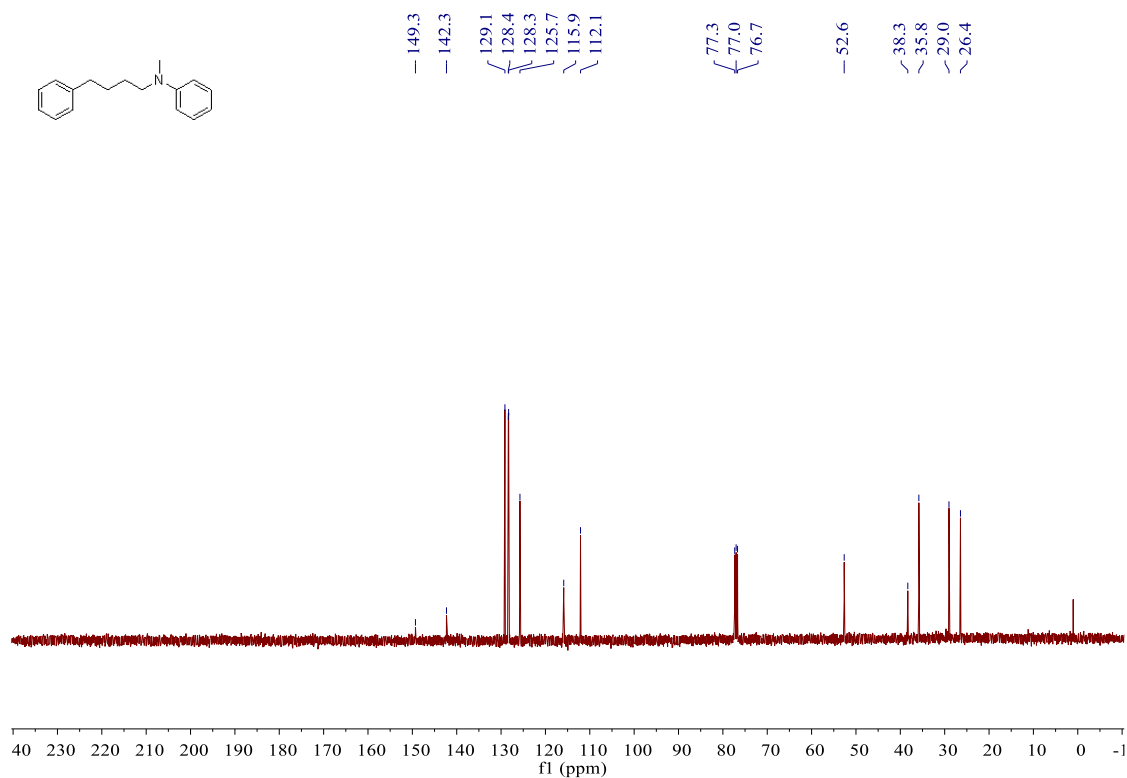

**Fig. S75.**  $^{13}\text{C}$  NMR (101 MHz,  $\text{CDCl}_3$ , 298 K) spectrum of compound **9aa**.

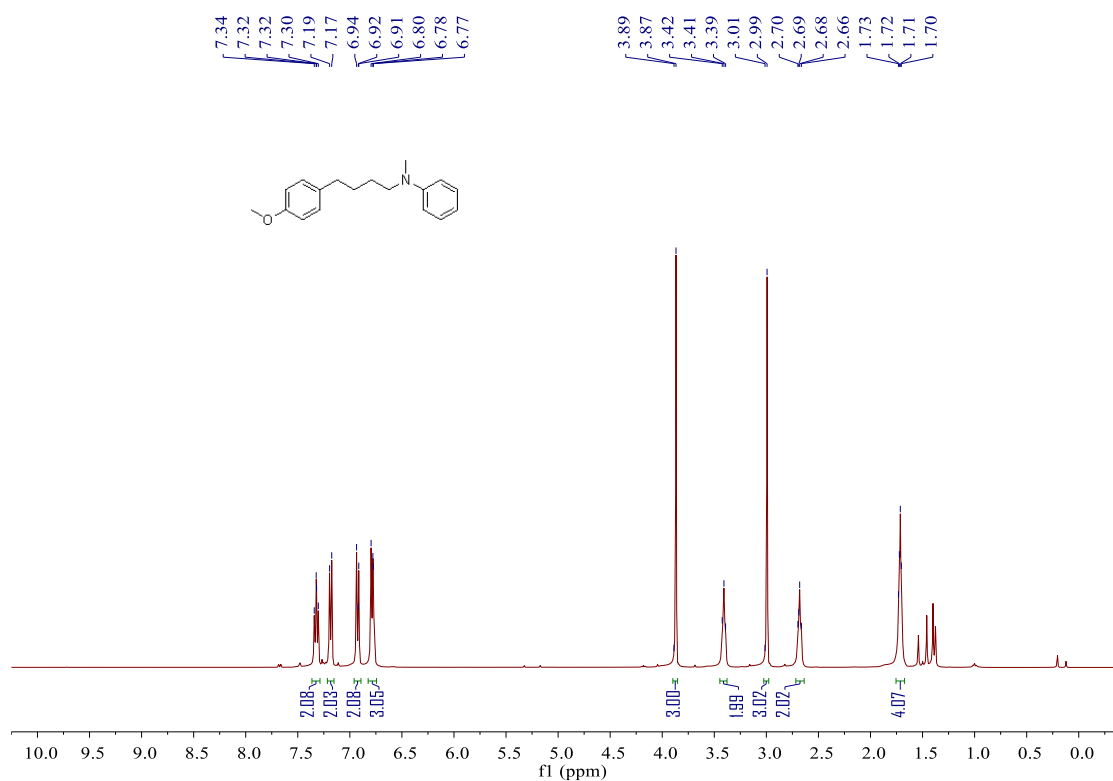

**Fig. S76.**  $^1\text{H}$  NMR (400 MHz,  $\text{CDCl}_3$ , 298 K) spectrum of compound **9ba**.

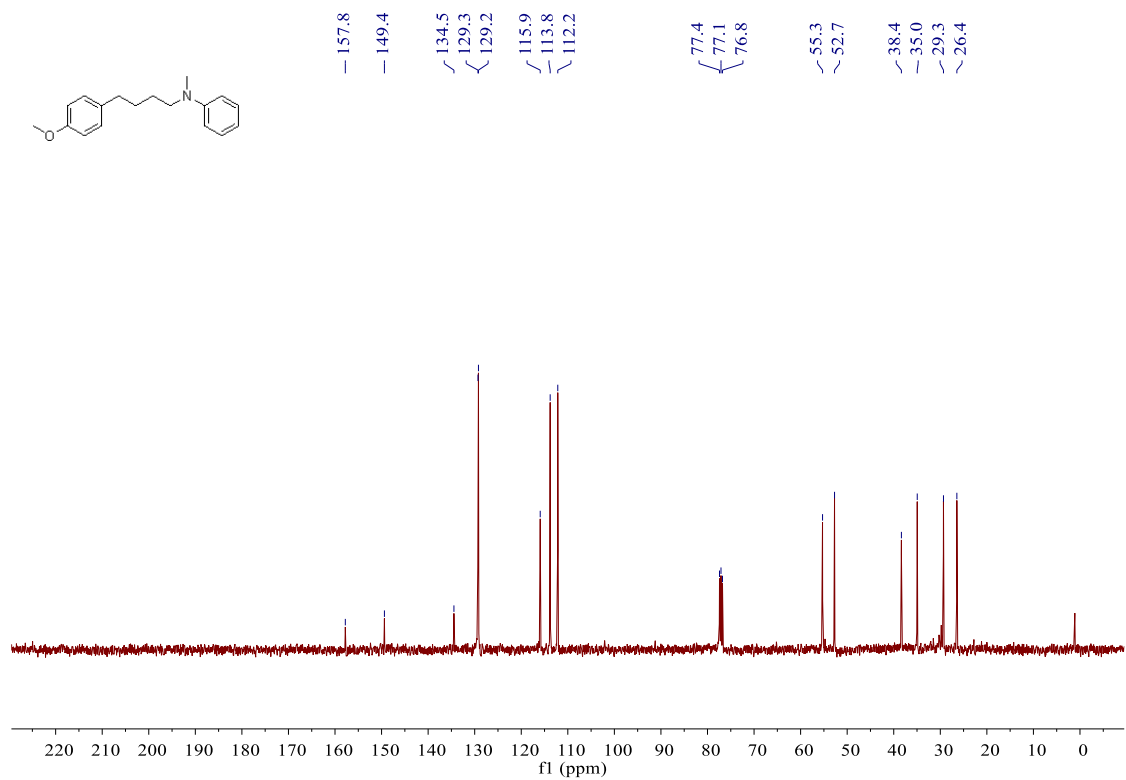

**Fig. S77.**  $^{13}\text{C}$  NMR (101 MHz,  $\text{CDCl}_3$ , 298 K) spectrum of compound **9ba**.

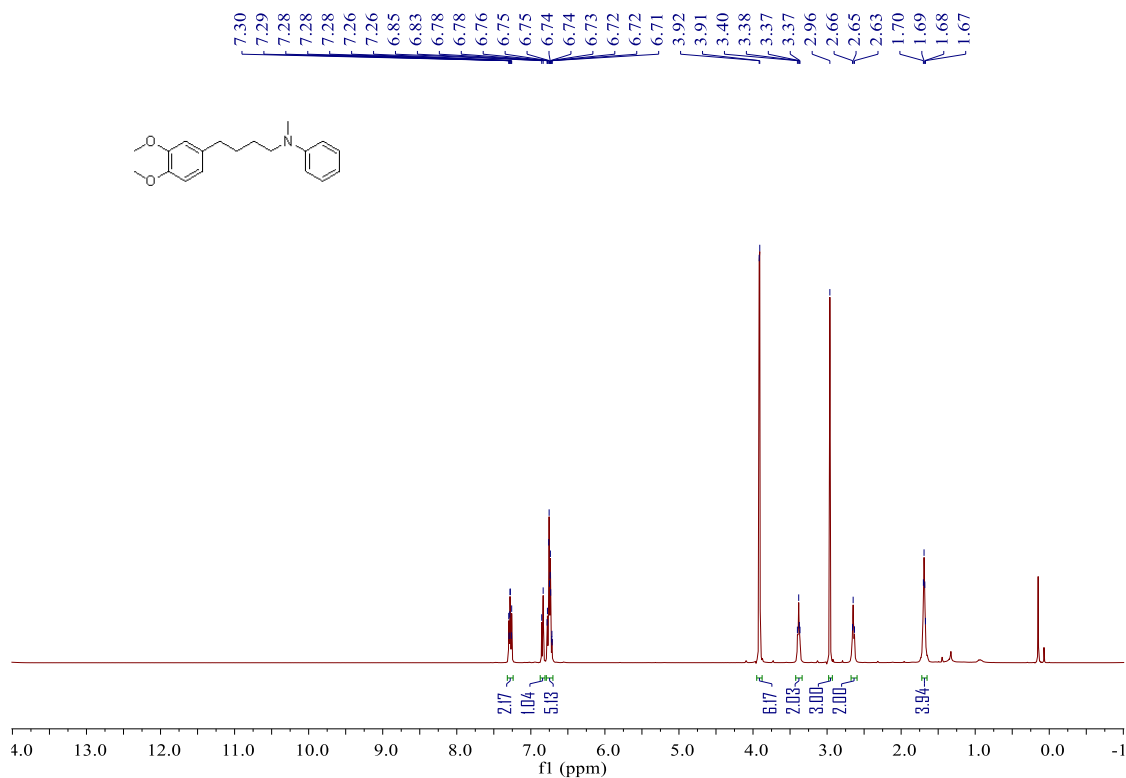

**Fig. S78.**  $^1\text{H}$  NMR (400 MHz,  $\text{CDCl}_3$ , 298 K) spectrum of compound **9ca**.

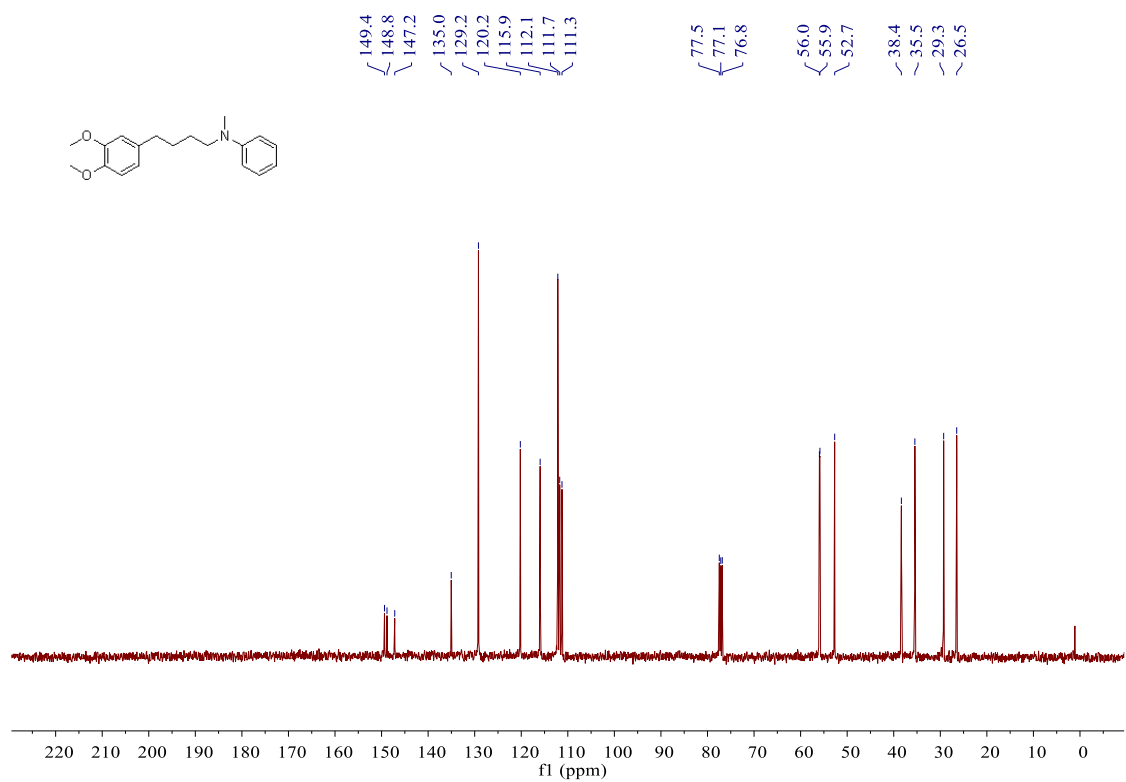

**Fig. S79.**  $^{13}\text{C}$  NMR (101 MHz,  $\text{CDCl}_3$ , 298 K) spectrum of compound **9ca**.

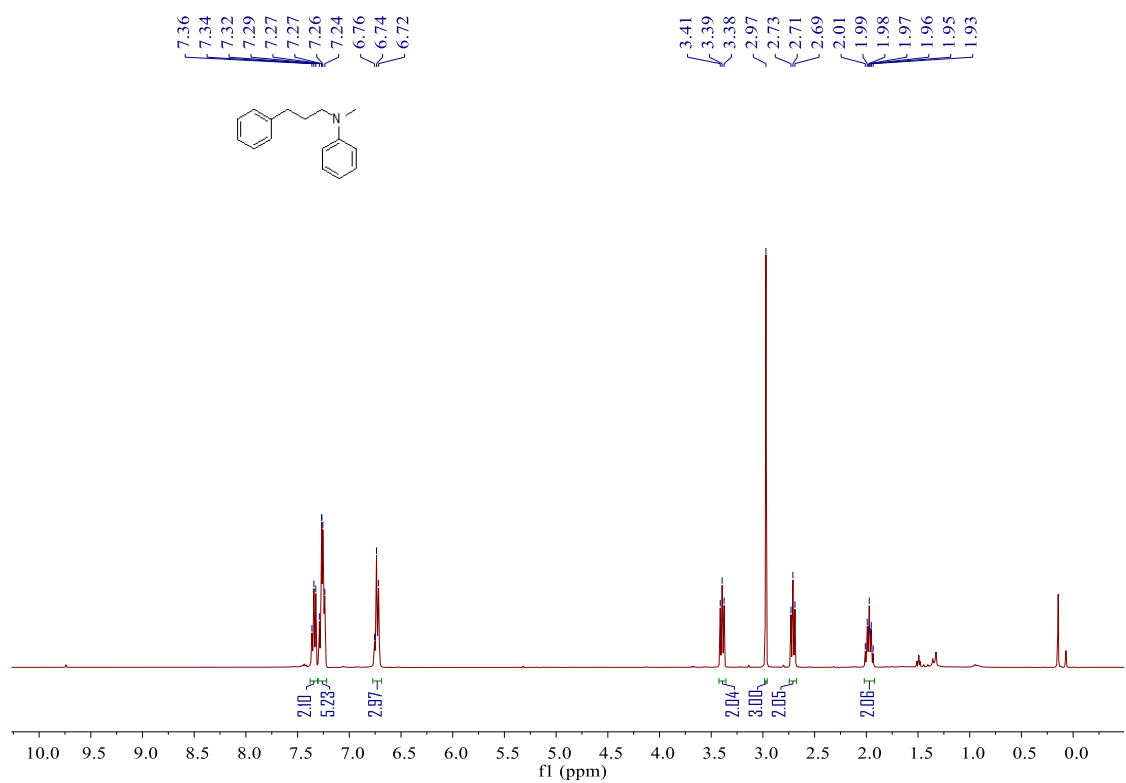

**Fig. S80.**  $^1\text{H}$  NMR (400 MHz,  $\text{CDCl}_3$ , 298 K) spectrum of compound **9da**.

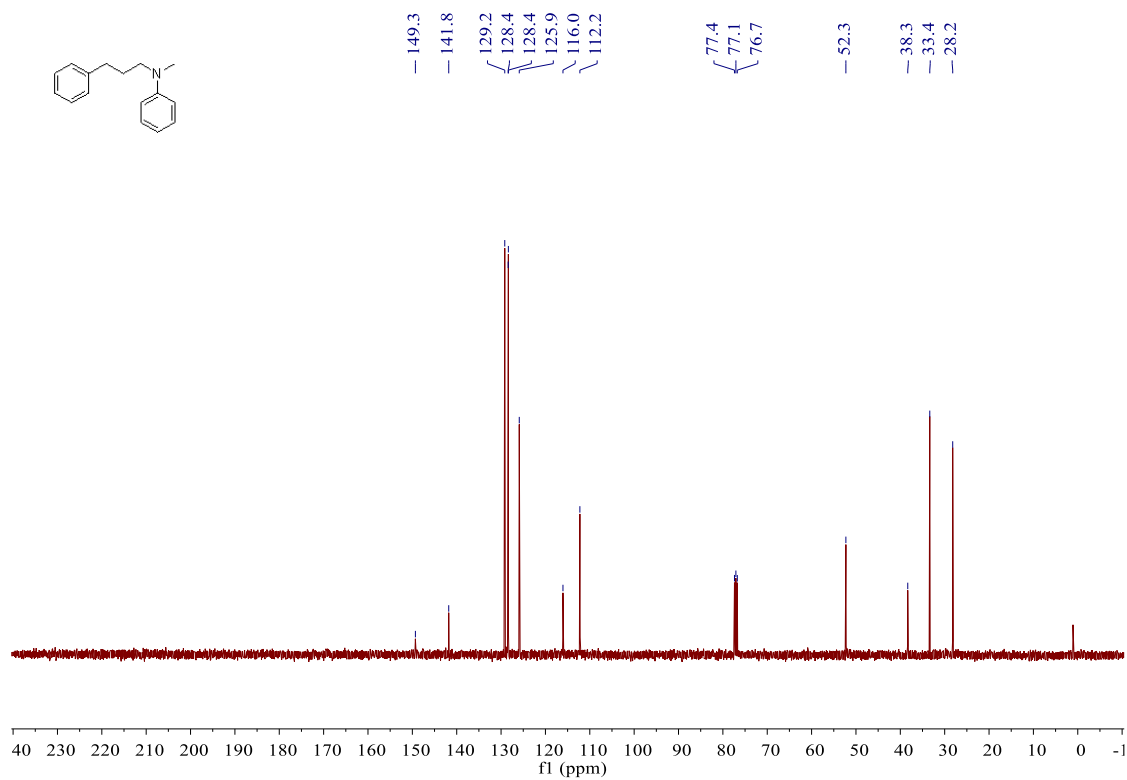

**Fig. S81.**  $^{13}\text{C}$  NMR (101 MHz,  $\text{CDCl}_3$ , 298 K) spectrum of compound **9da**.

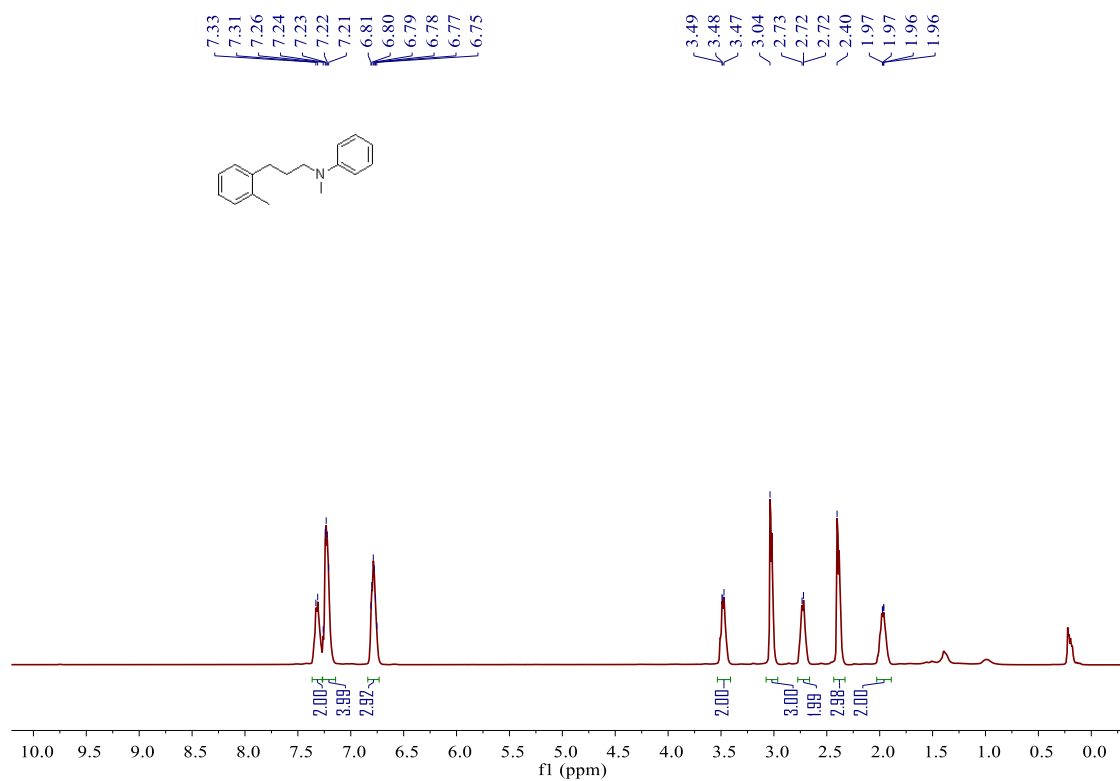

**Fig. S82.**  $^1\text{H}$  NMR (400 MHz,  $\text{CDCl}_3$ , 298 K) spectrum of compound **9ea-o**.



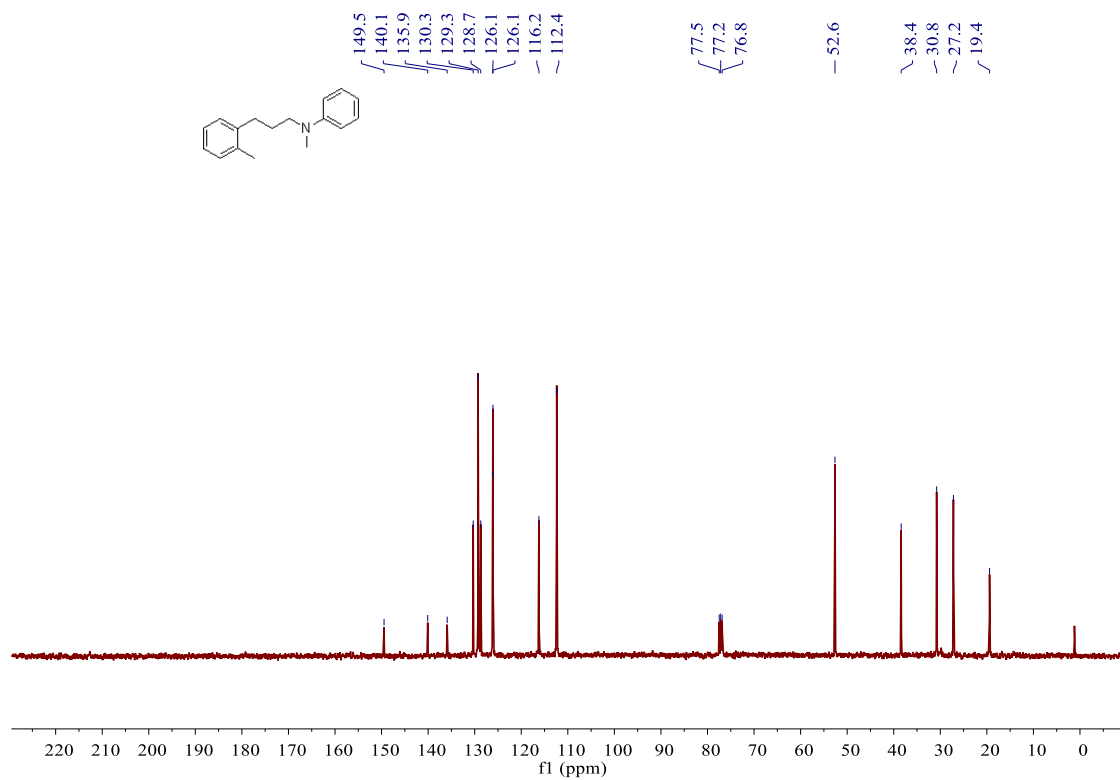

**Fig. S83.**  $^{13}\text{C}$  NMR (101 MHz,  $\text{CDCl}_3$ , 298 K) spectrum of compound **9ea-o**.

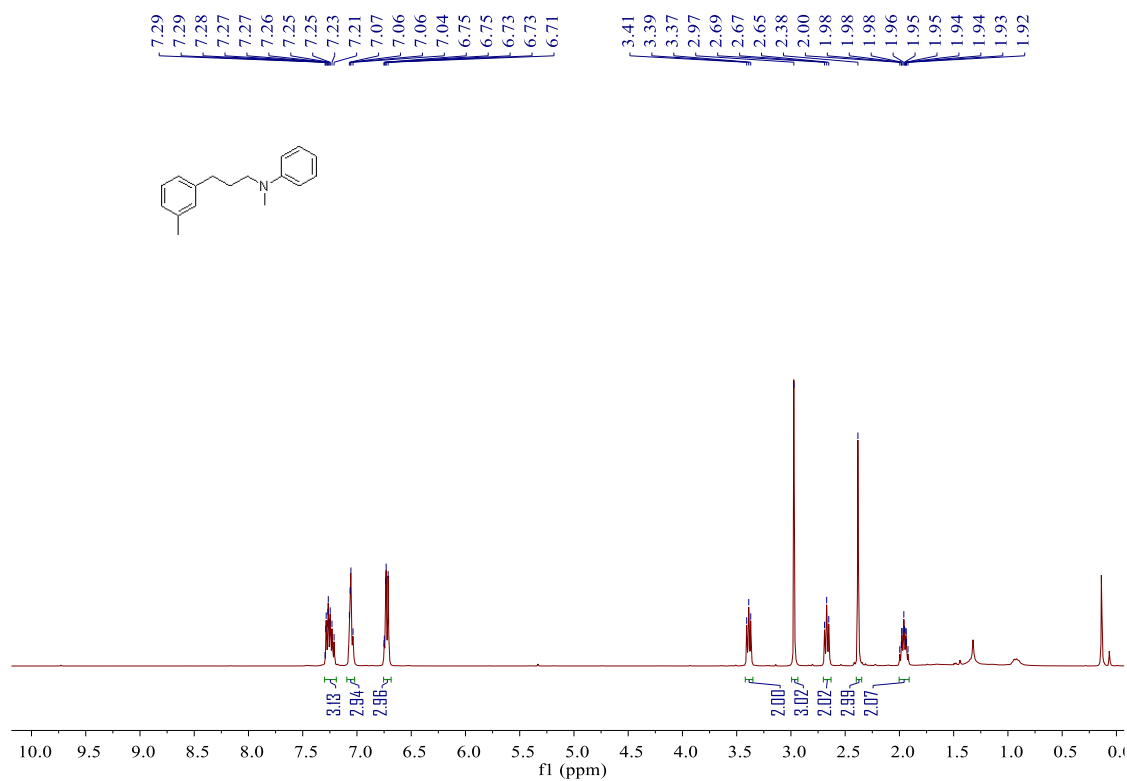

**Fig. S84.**  $^1\text{H}$  NMR (400 MHz,  $\text{CDCl}_3$ , 298 K) spectrum of compound **9ea-m**.

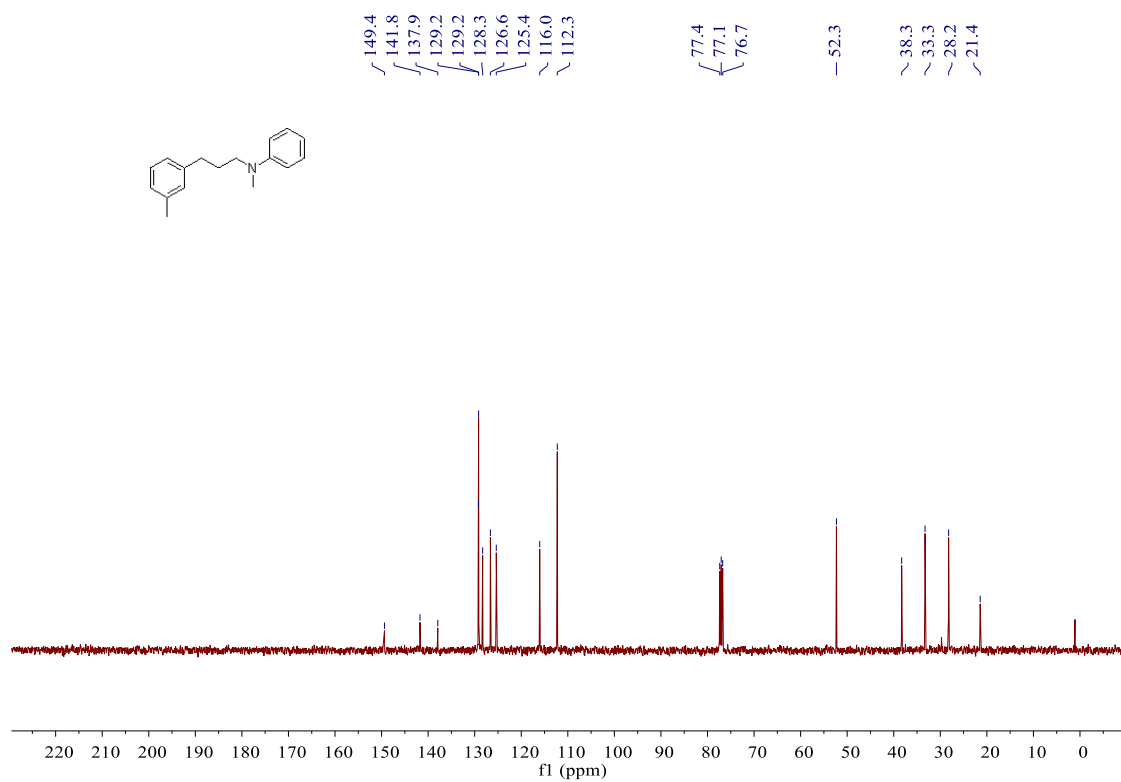

**Fig. S85.**  $^{13}\text{C}$  NMR (101 MHz,  $\text{CDCl}_3$ , 298 K) spectrum of compound **9ea-m**.

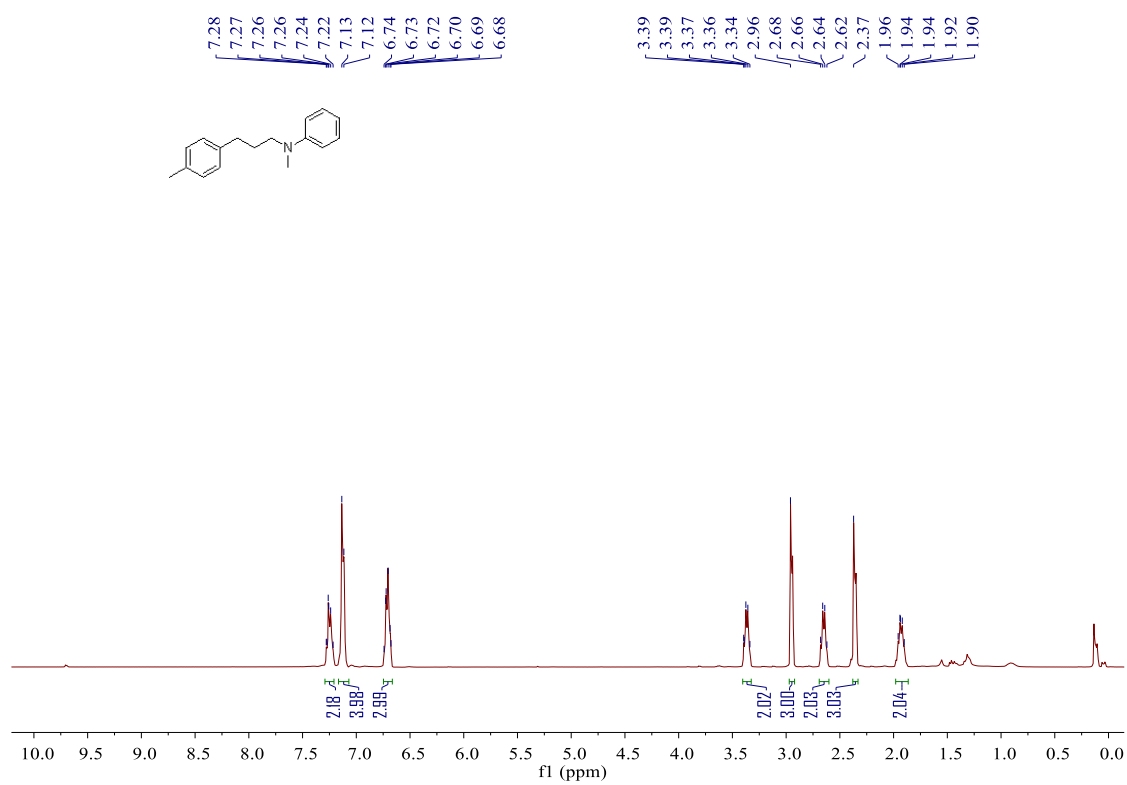

**Fig. S86.**  $^1\text{H}$  NMR (400 MHz,  $\text{CDCl}_3$ , 298 K) spectrum of compound **9ea-p**.

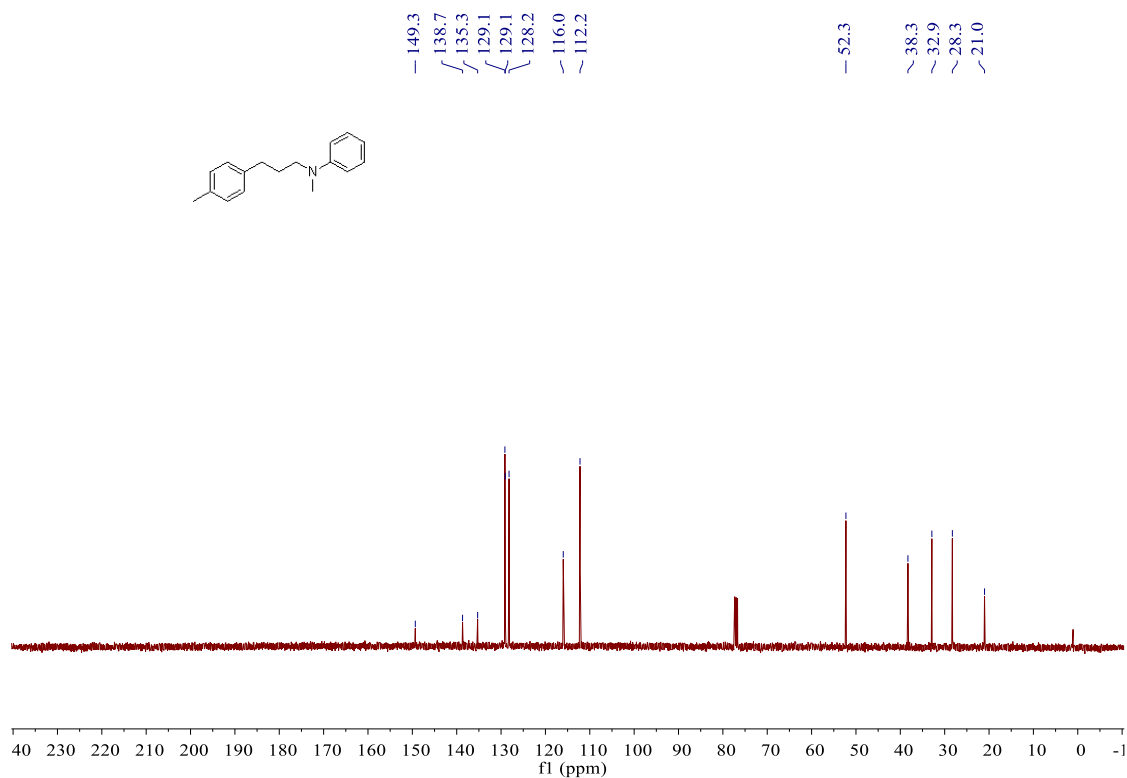

Fig. S87. <sup>13</sup>C NMR (101 MHz, CDCl<sub>3</sub>, 298 K) spectrum of compound 9ea-p.

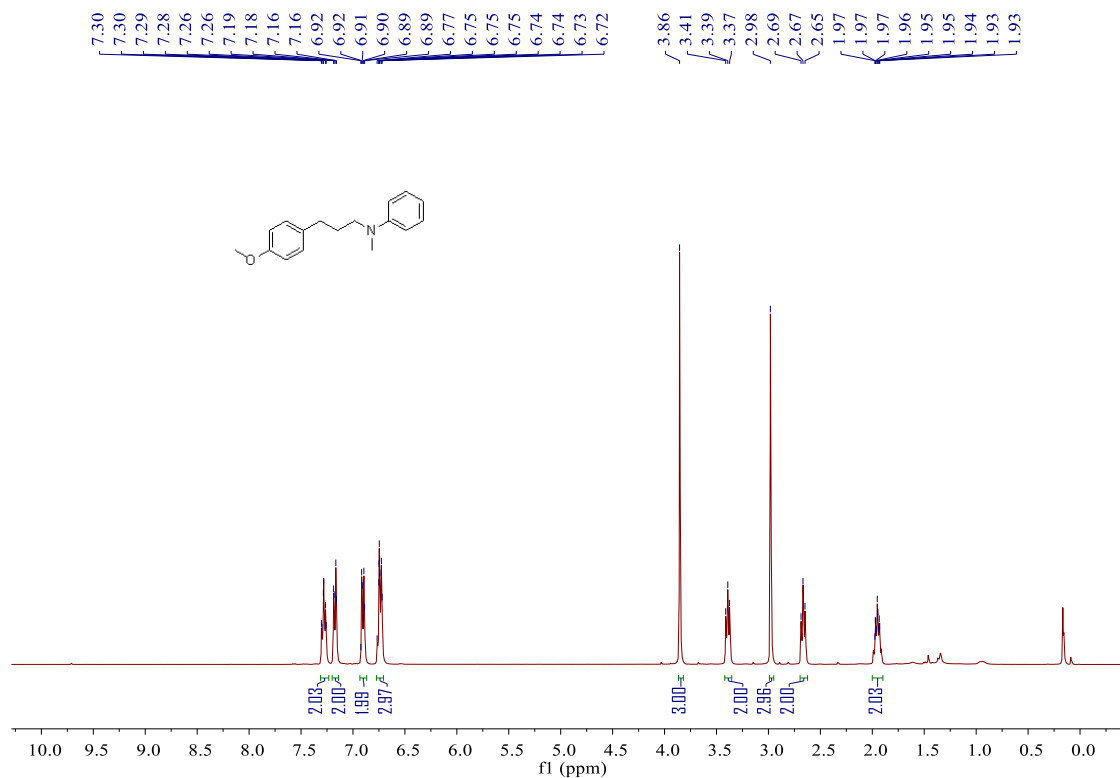

Fig. S88. <sup>1</sup>H NMR (400 MHz, CDCl<sub>3</sub>, 298 K) spectrum of compound 9fa.

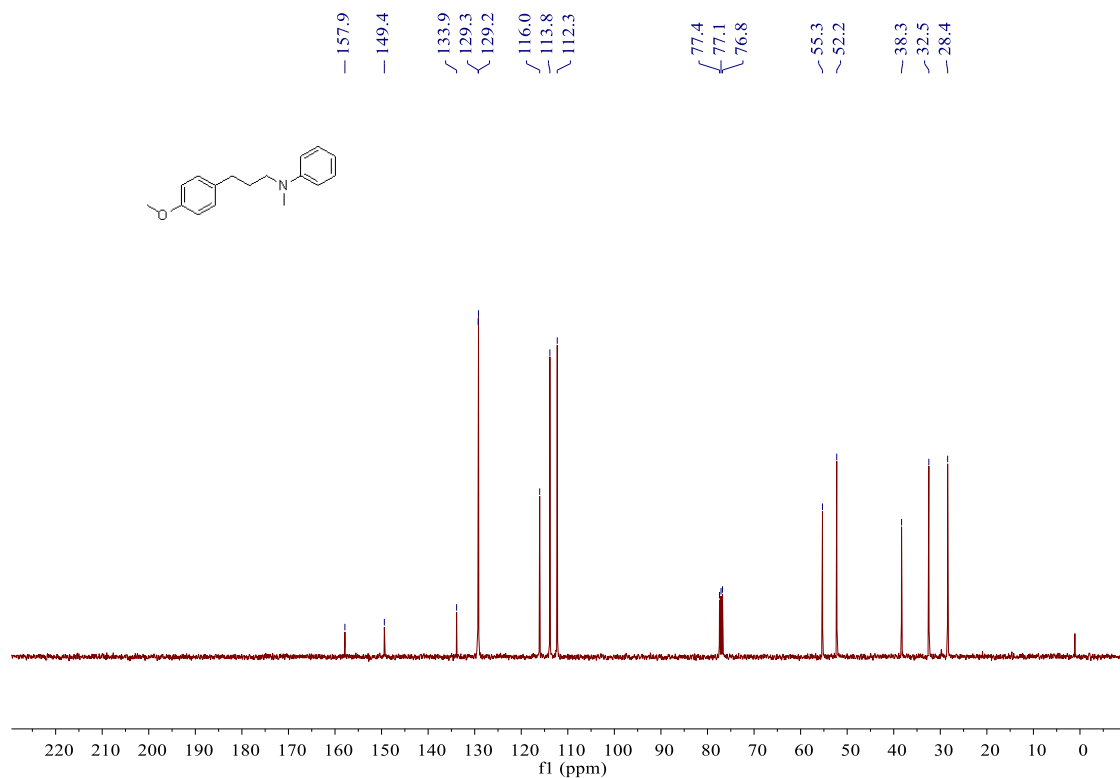

Fig. S89. <sup>13</sup>C NMR (101 MHz, CDCl<sub>3</sub>, 298 K) spectrum of compound 9fa.

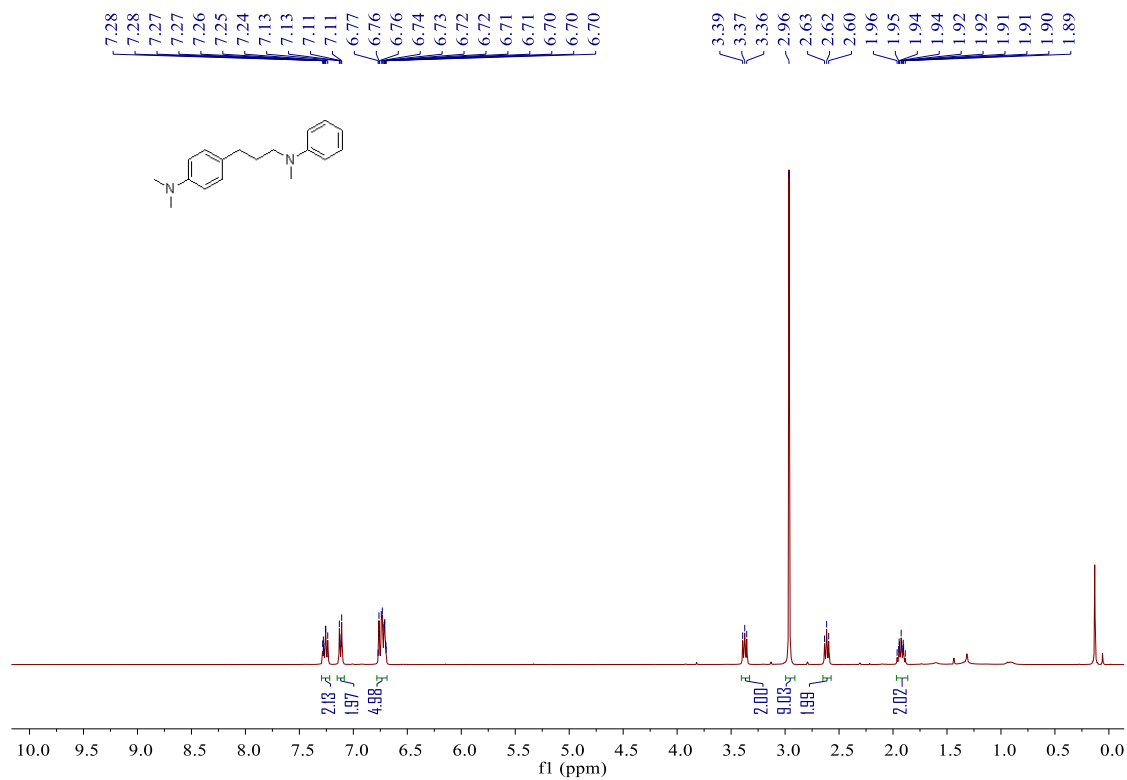

Fig. S90. <sup>1</sup>H NMR (400 MHz, CDCl<sub>3</sub>, 298 K) spectrum of compound 9ga.

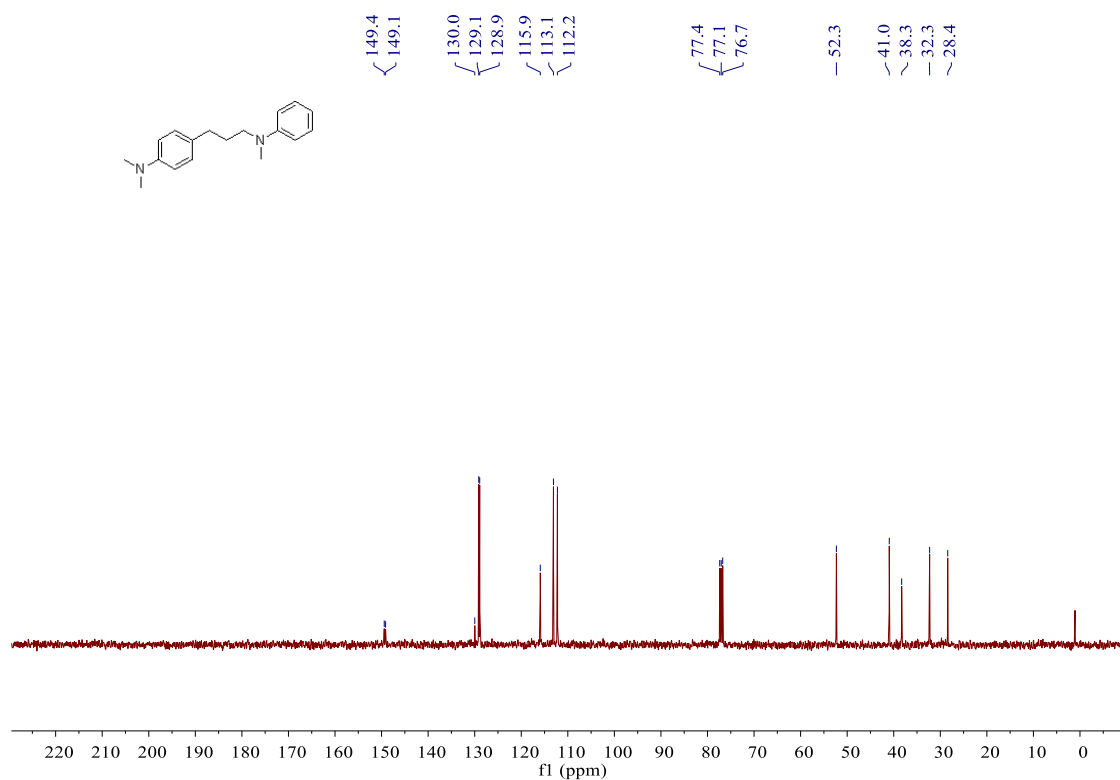

**Fig. S91.**  $^{13}\text{C}$  NMR (101 MHz,  $\text{CDCl}_3$ , 298 K) spectrum of compound **9ga**.

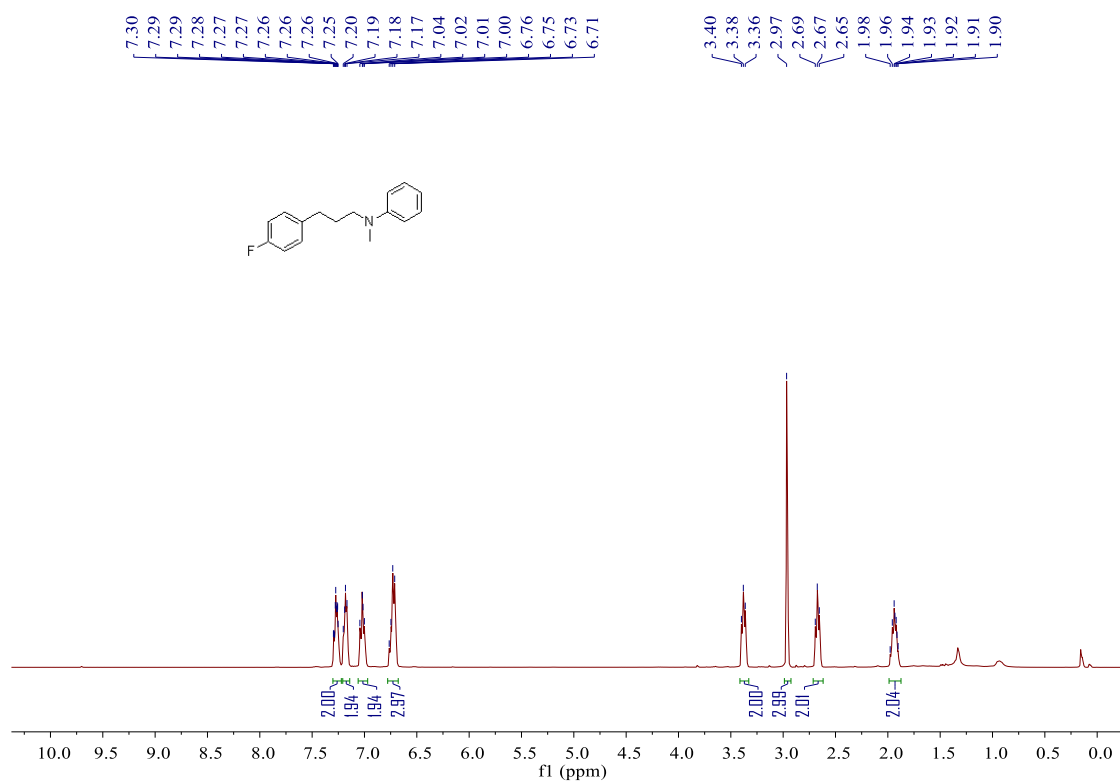

**Fig. S92.**  $^1\text{H}$  NMR (400 MHz,  $\text{CDCl}_3$ , 298 K) spectrum of compound **9ha**.

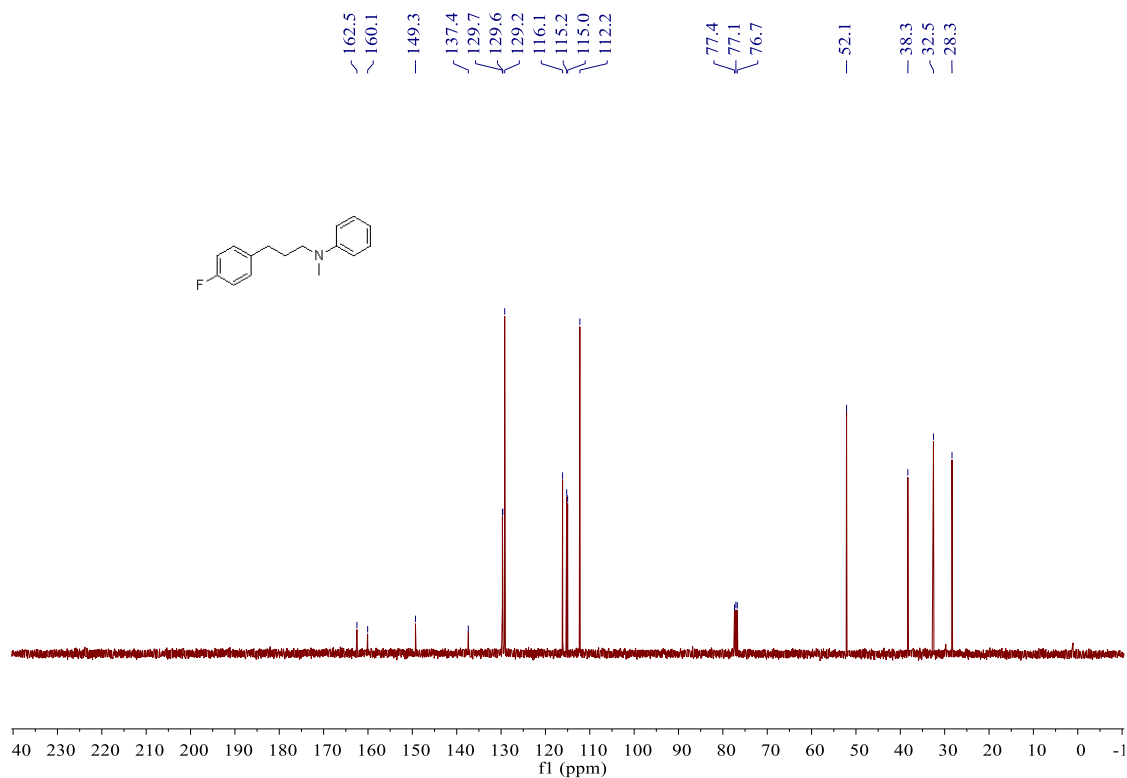

**Fig. S93.**  $^{13}\text{C}$  NMR (101 MHz,  $\text{CDCl}_3$ , 298 K) spectrum of compound **9ha**.

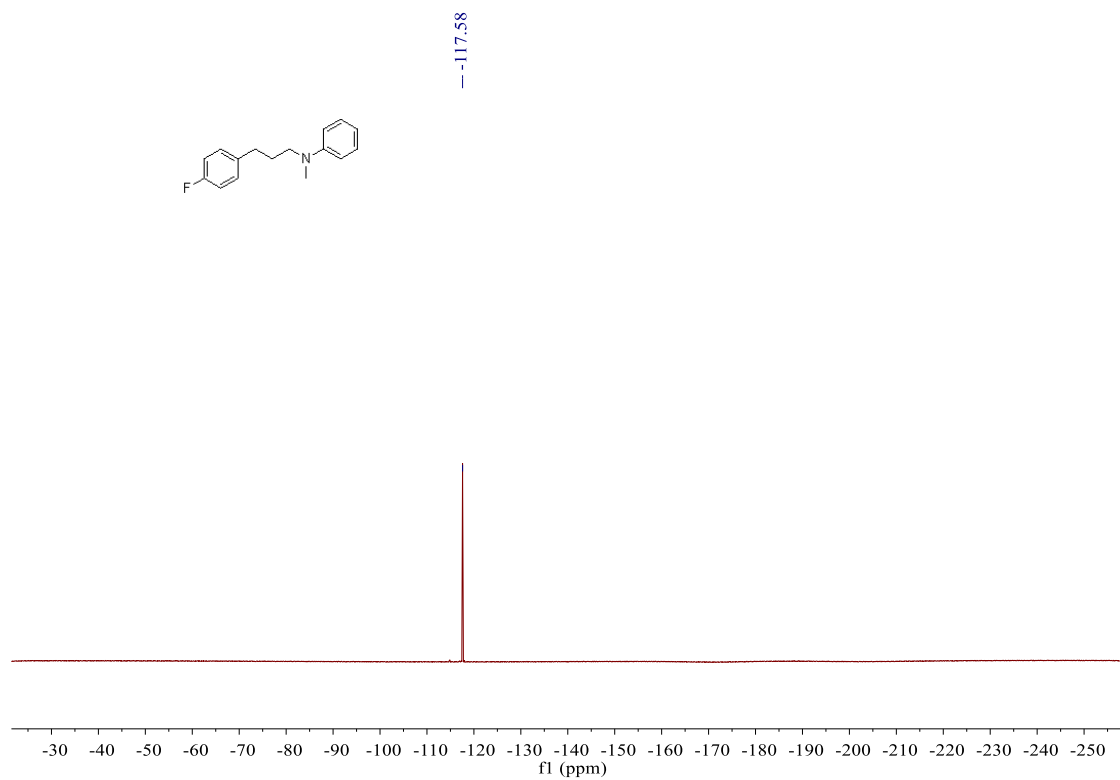

**Fig. S94.**  $^{19}\text{F}$  NMR (376 MHz,  $\text{CDCl}_3$ , 298 K) spectrum of compound **9ha**.

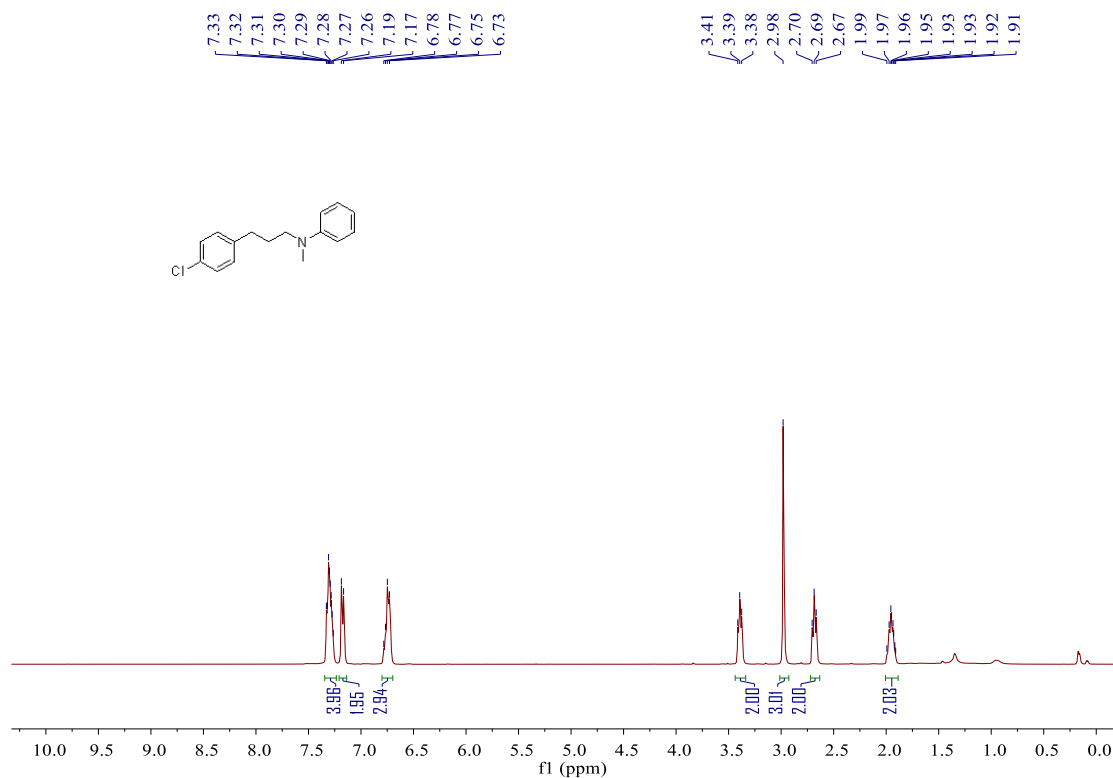

**Fig. S95.** <sup>1</sup>H NMR (400 MHz, CDCl<sub>3</sub>, 298 K) spectrum of compound **9ia**.

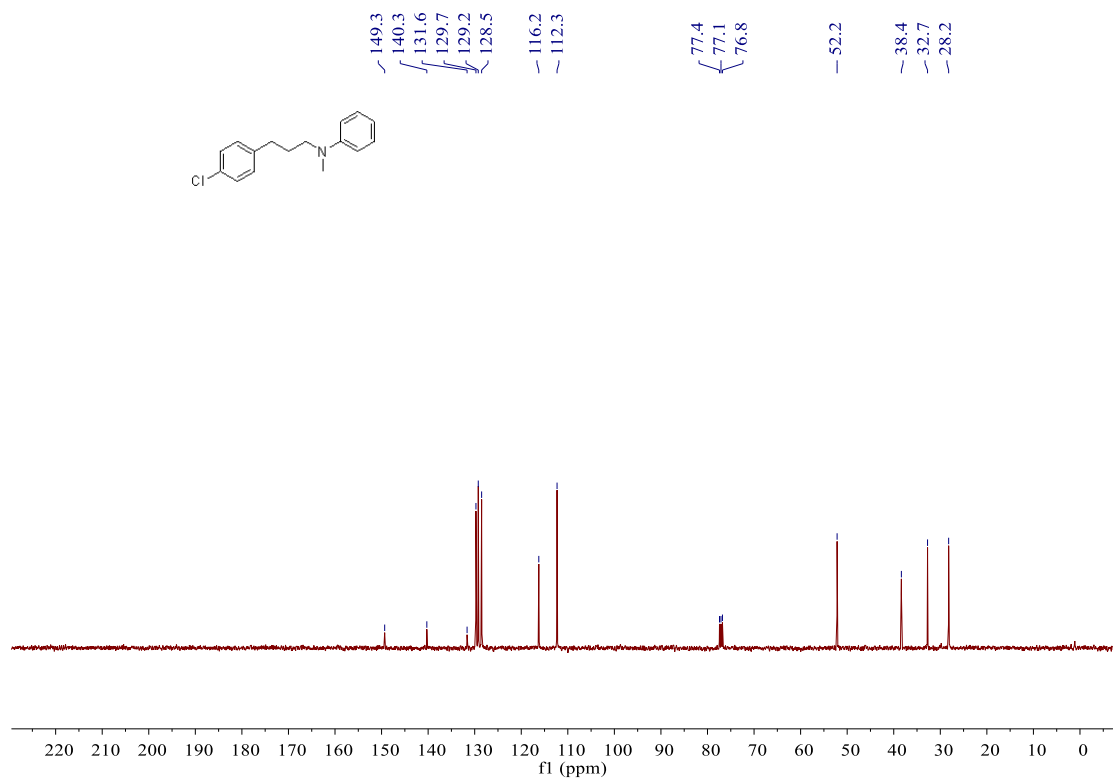

**Fig. S96.** <sup>13</sup>C NMR (101 MHz, CDCl<sub>3</sub>, 298 K) spectrum of compound **9ia**.

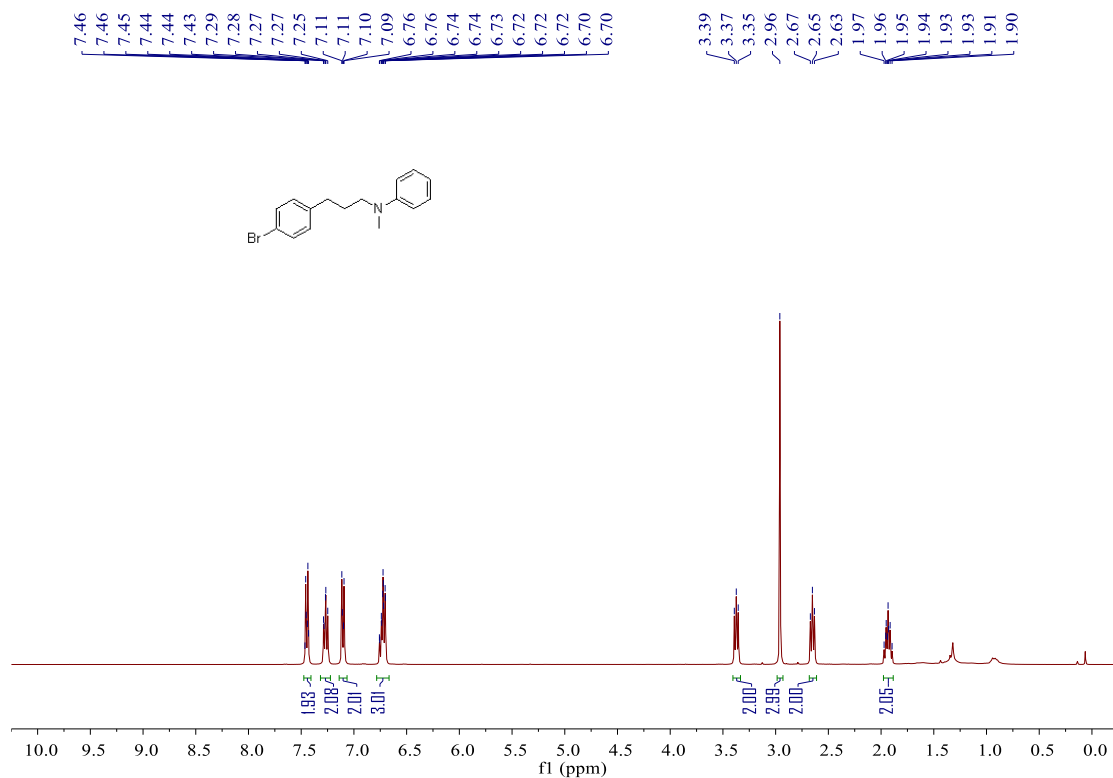

**Fig. S97.** <sup>1</sup>H NMR (400 MHz, CDCl<sub>3</sub>, 298 K) spectrum of compound **9ja**.

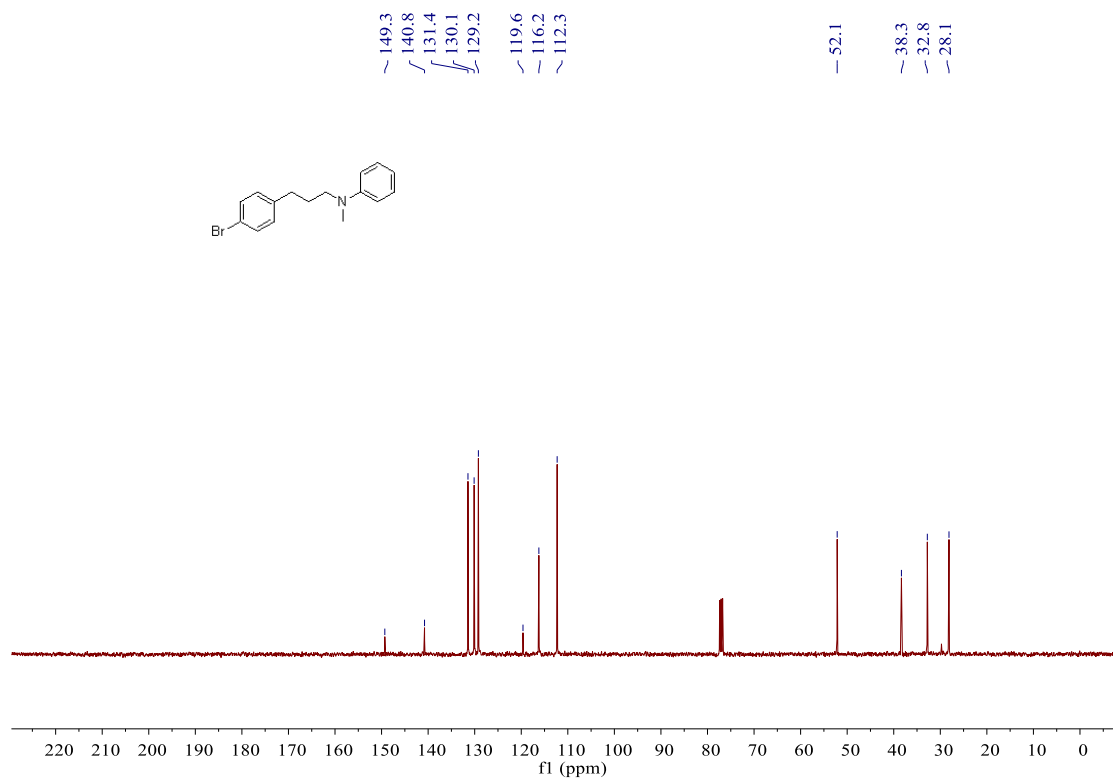

**Fig. S98.** <sup>13</sup>C NMR (101 MHz, CDCl<sub>3</sub>, 298 K) spectrum of compound **9ja**.



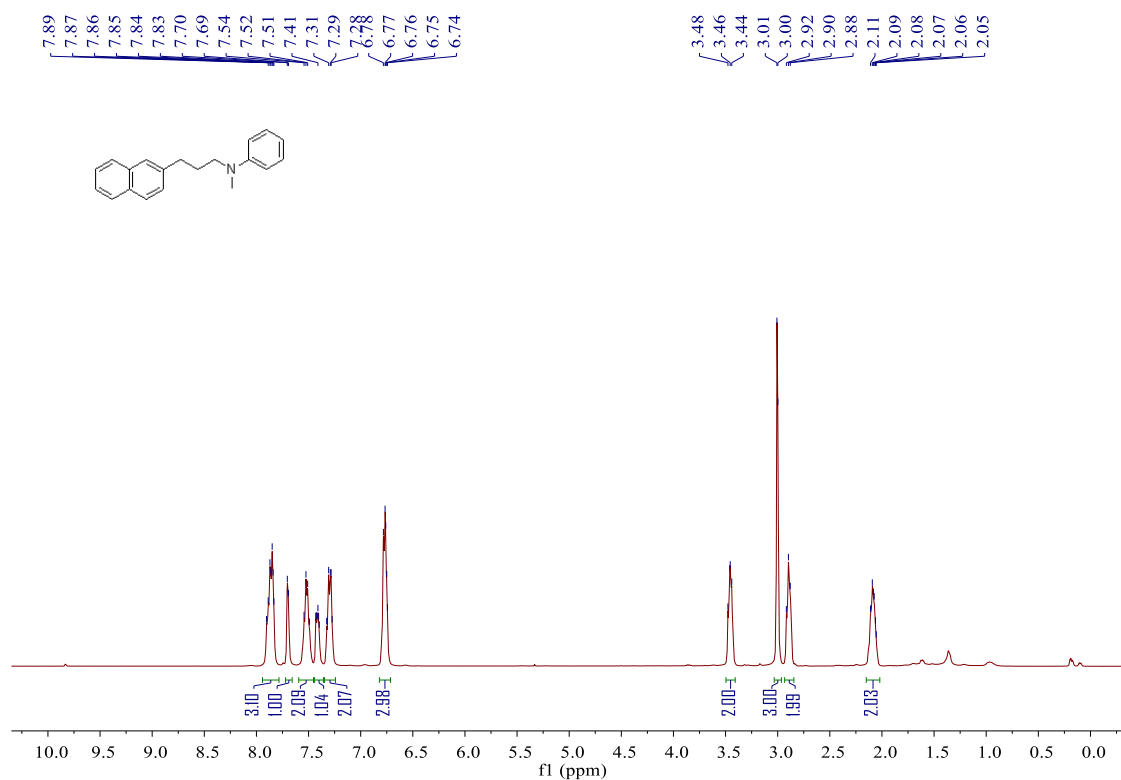

**Fig. S99.** <sup>1</sup>H NMR (400 MHz, CDCl<sub>3</sub>, 298 K) spectrum of compound **9ka**.

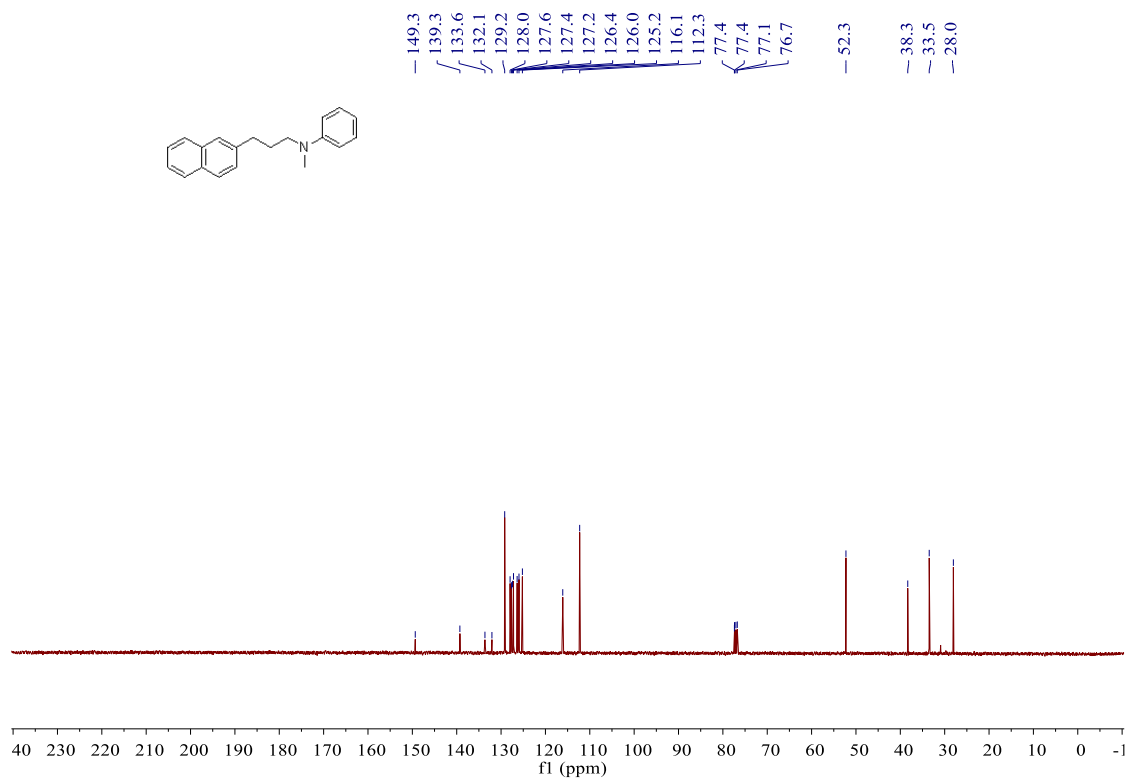

**Fig. S100.** <sup>13</sup>C NMR (101 MHz, CDCl<sub>3</sub>, 298 K) spectrum of compound **9ka**.

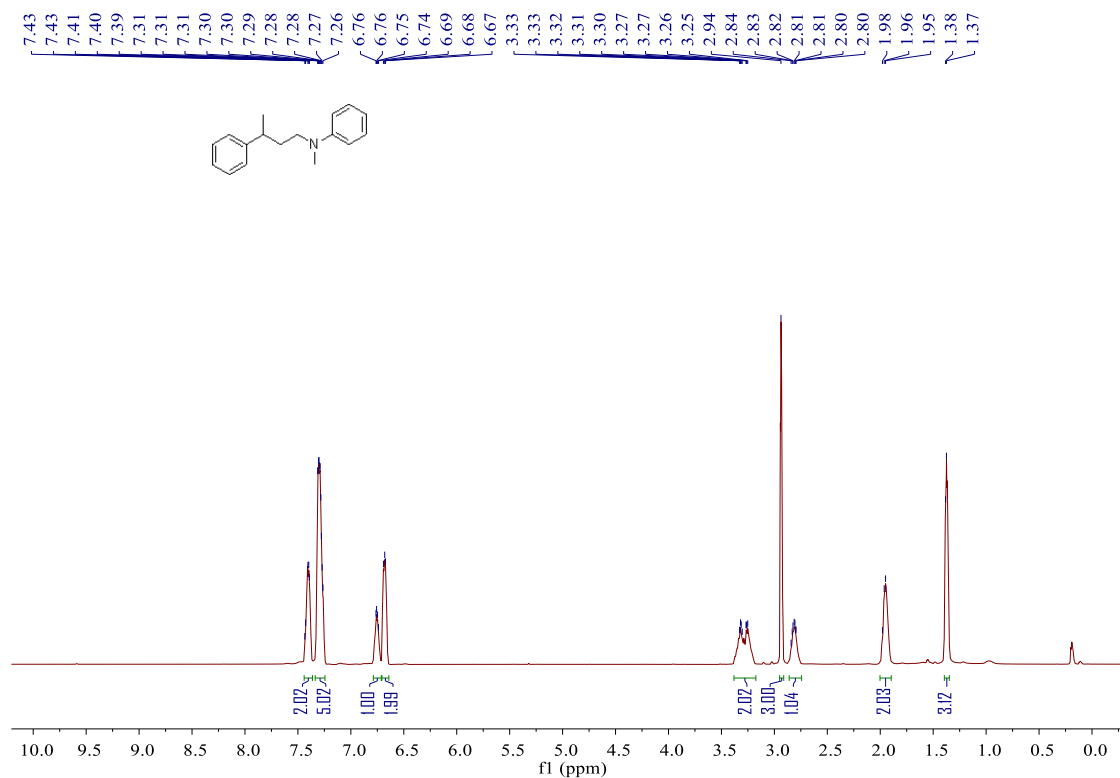

**Fig. S101.** <sup>1</sup>H NMR (400 MHz, CDCl<sub>3</sub>, 298 K) spectrum of compound 9la.

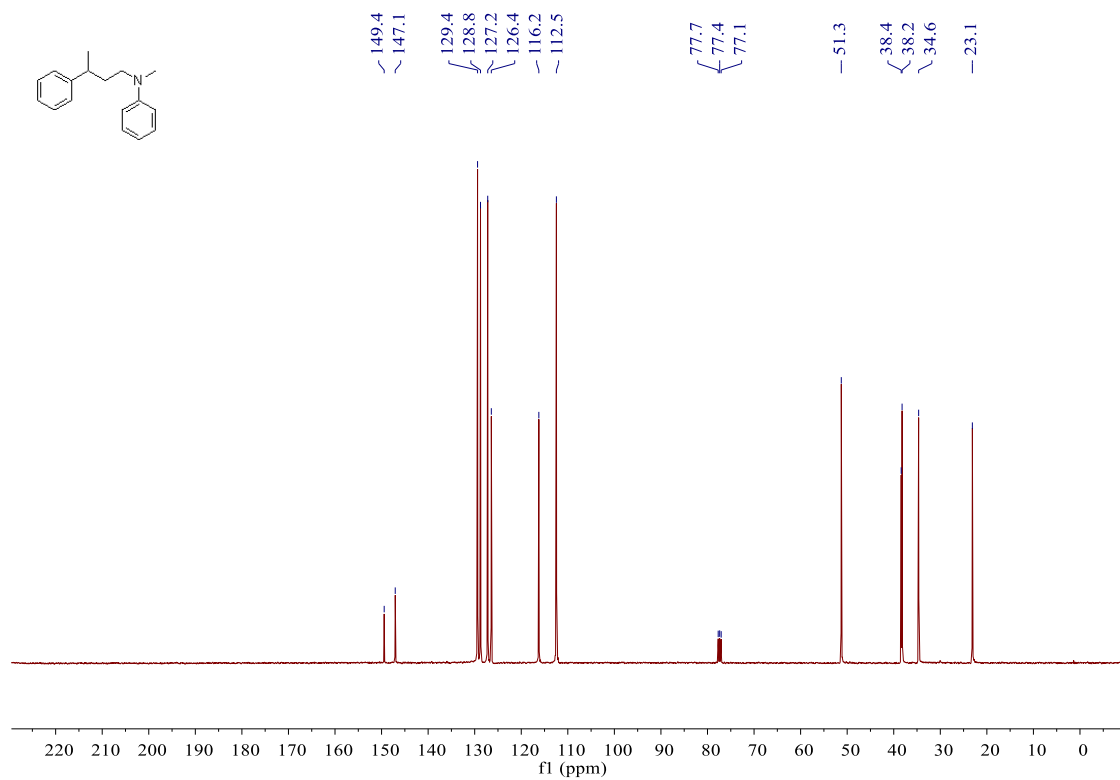

**Fig. S102.** <sup>13</sup>C NMR (101 MHz, CDCl<sub>3</sub>, 298 K) spectrum of compound 9la.

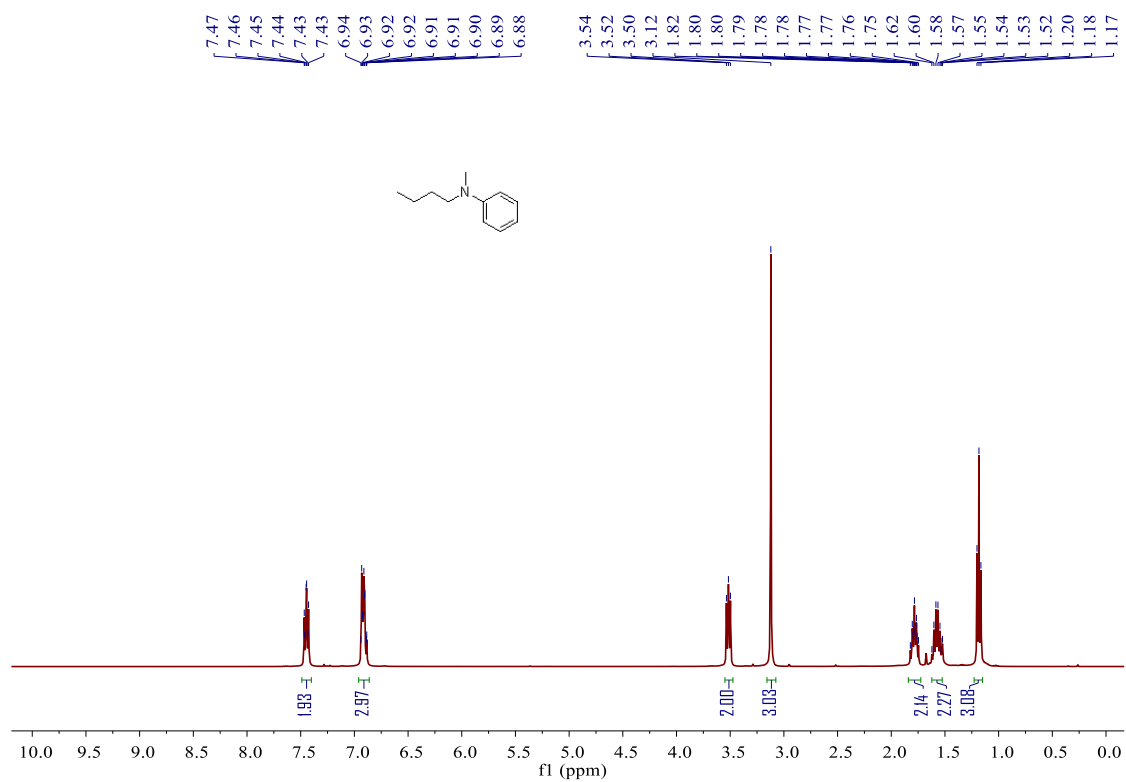

**Fig. S103.** <sup>1</sup>H NMR (400 MHz, CDCl<sub>3</sub>, 298 K) spectrum of compound **9ma-2**.

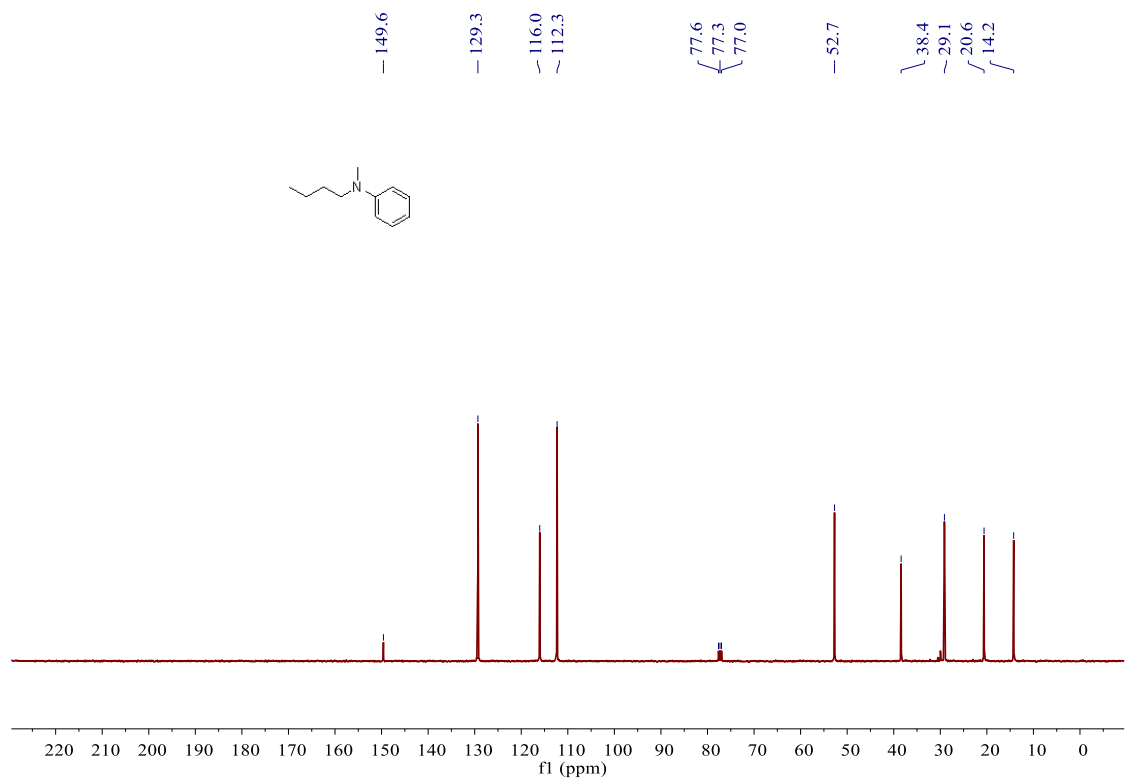

**Fig. S104.** <sup>13</sup>C NMR (101 MHz, CDCl<sub>3</sub>, 298 K) spectrum of compound **9ma-2**.

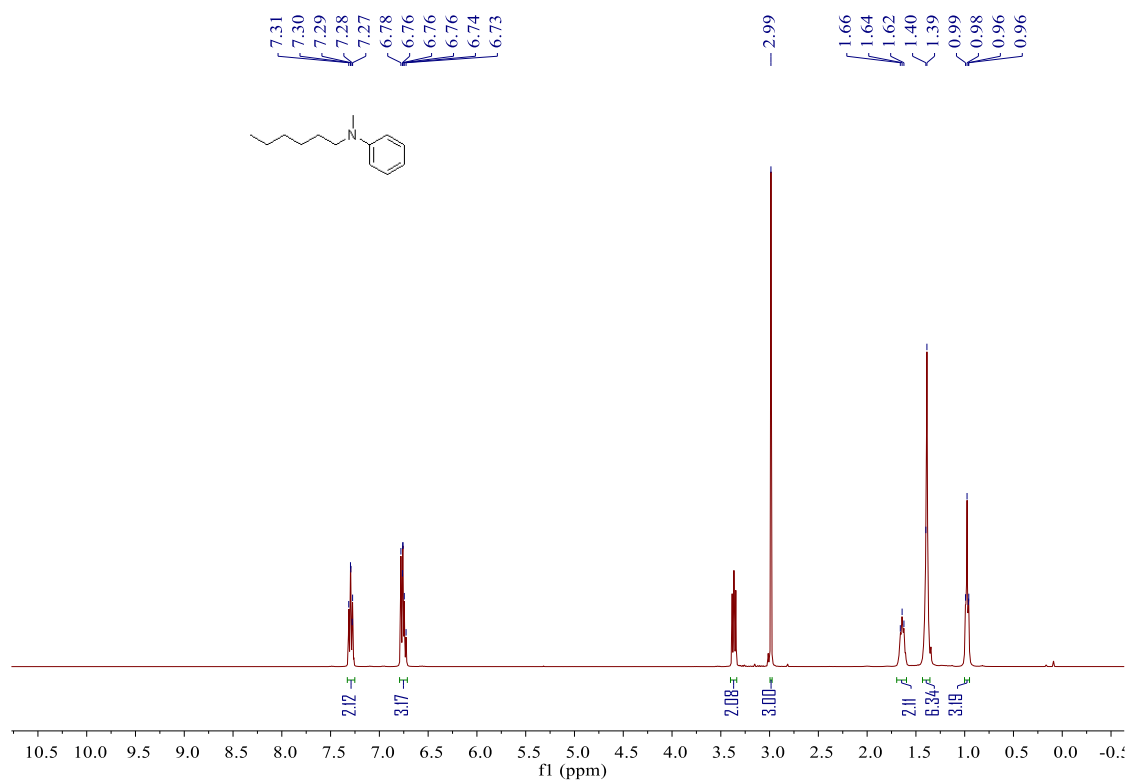

**Fig. S105.** <sup>1</sup>H NMR (400 MHz, CDCl<sub>3</sub>, 298 K) spectrum of compound **9ma-4**.

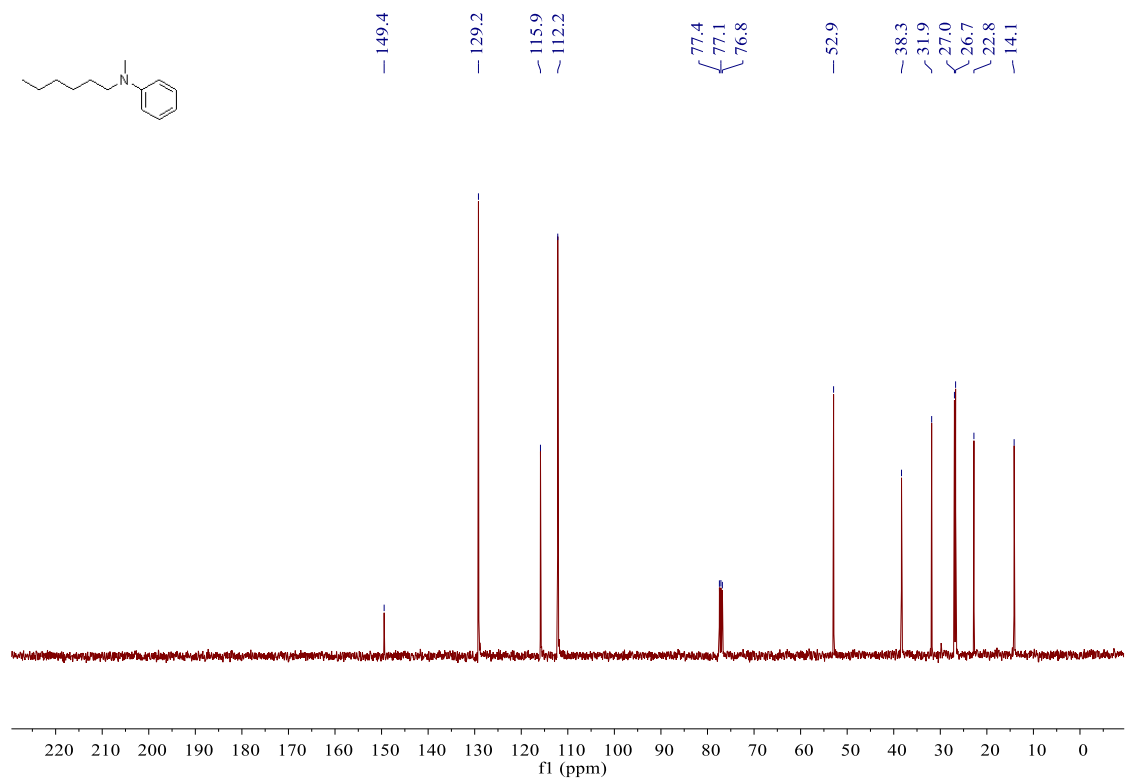

**Fig. S106.** <sup>13</sup>C NMR (101 MHz, CDCl<sub>3</sub>, 298 K) spectrum of compound **9ma-4**.

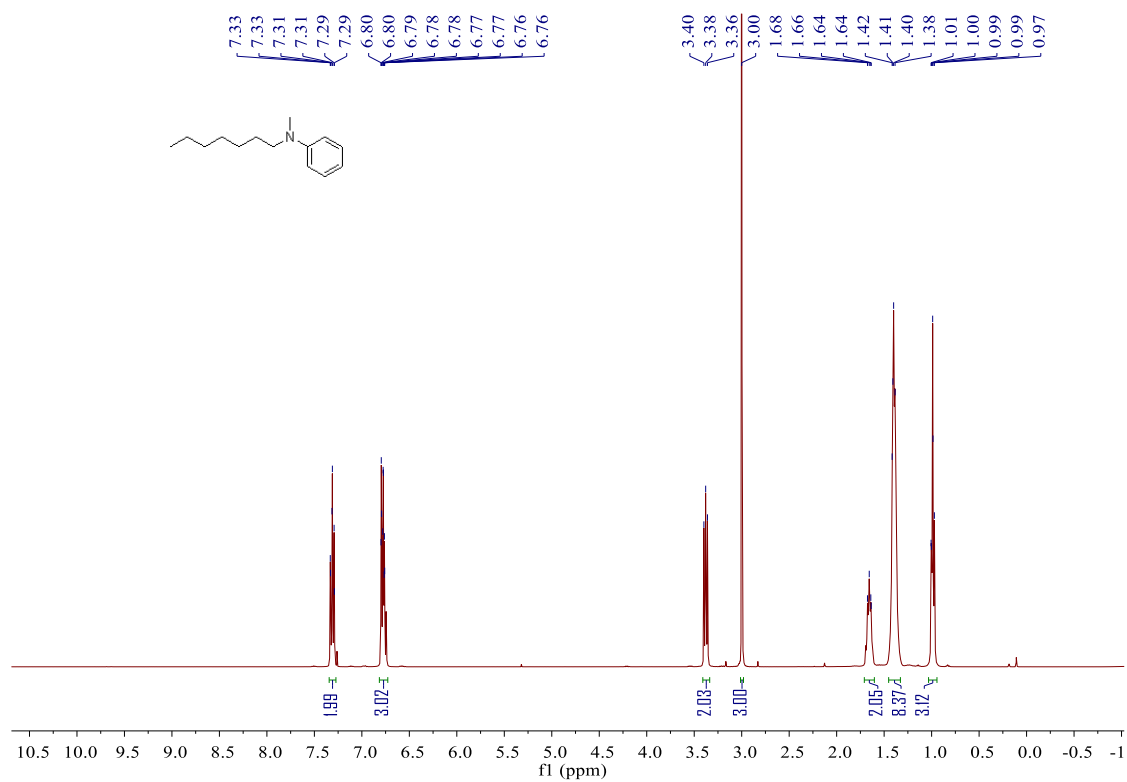

**Fig. S107.** <sup>1</sup>H NMR (400 MHz, CDCl<sub>3</sub>, 298 K) spectrum of compound **9ma-5**.

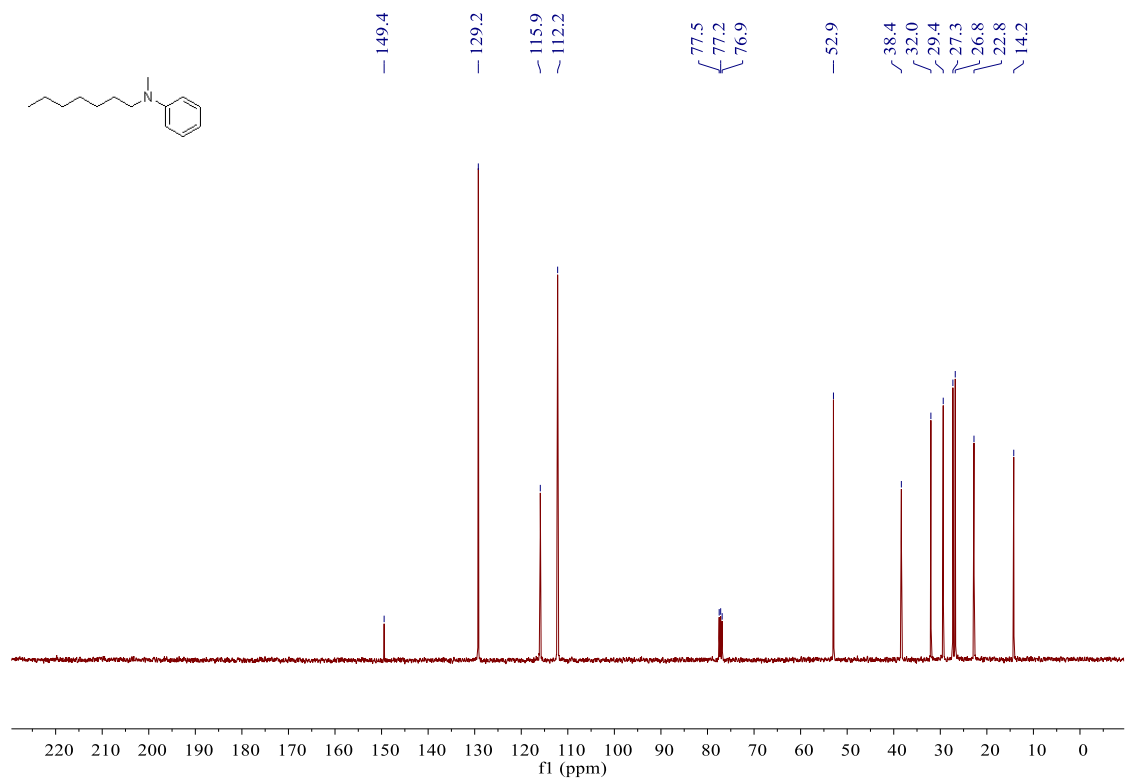

**Fig. S108.** <sup>13</sup>C NMR (101 MHz, CDCl<sub>3</sub>, 298 K) spectrum of compound **9ma-5**.

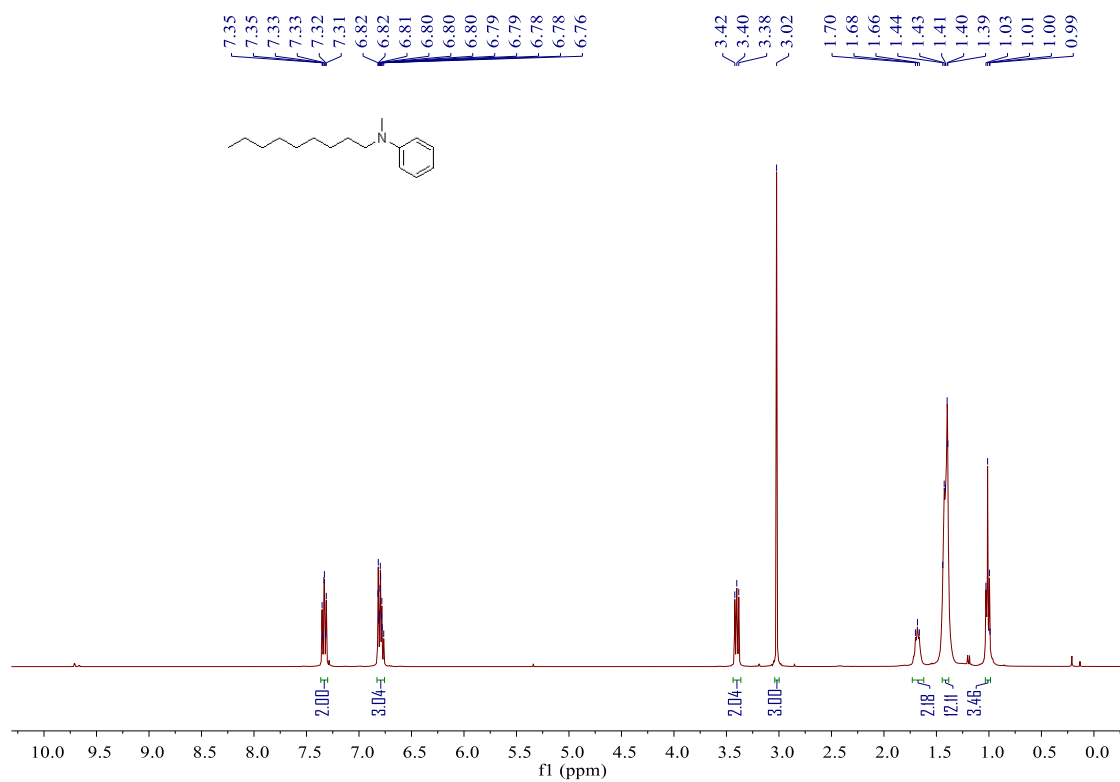

**Fig. S109.** <sup>1</sup>H NMR (400 MHz, CDCl<sub>3</sub>, 298 K) spectrum of compound **9ma-7**.

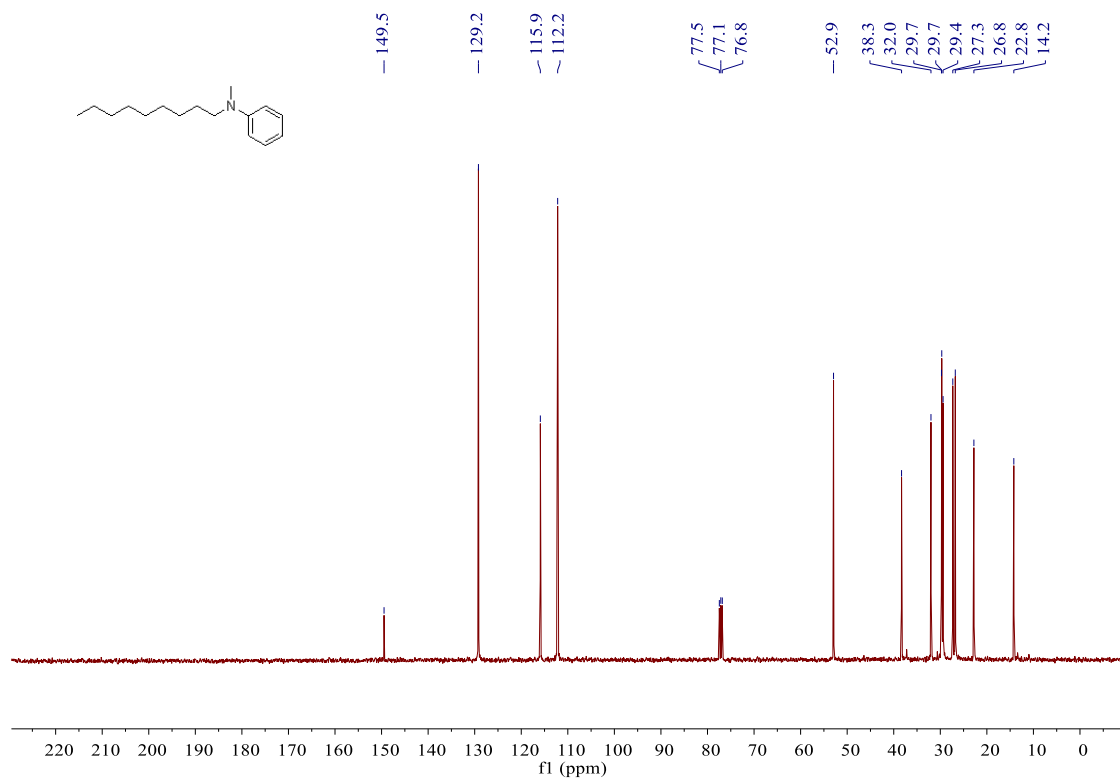

**Fig. S110.** <sup>13</sup>C NMR (101 MHz, CDCl<sub>3</sub>, 298 K) spectrum of compound **9ma-7**.

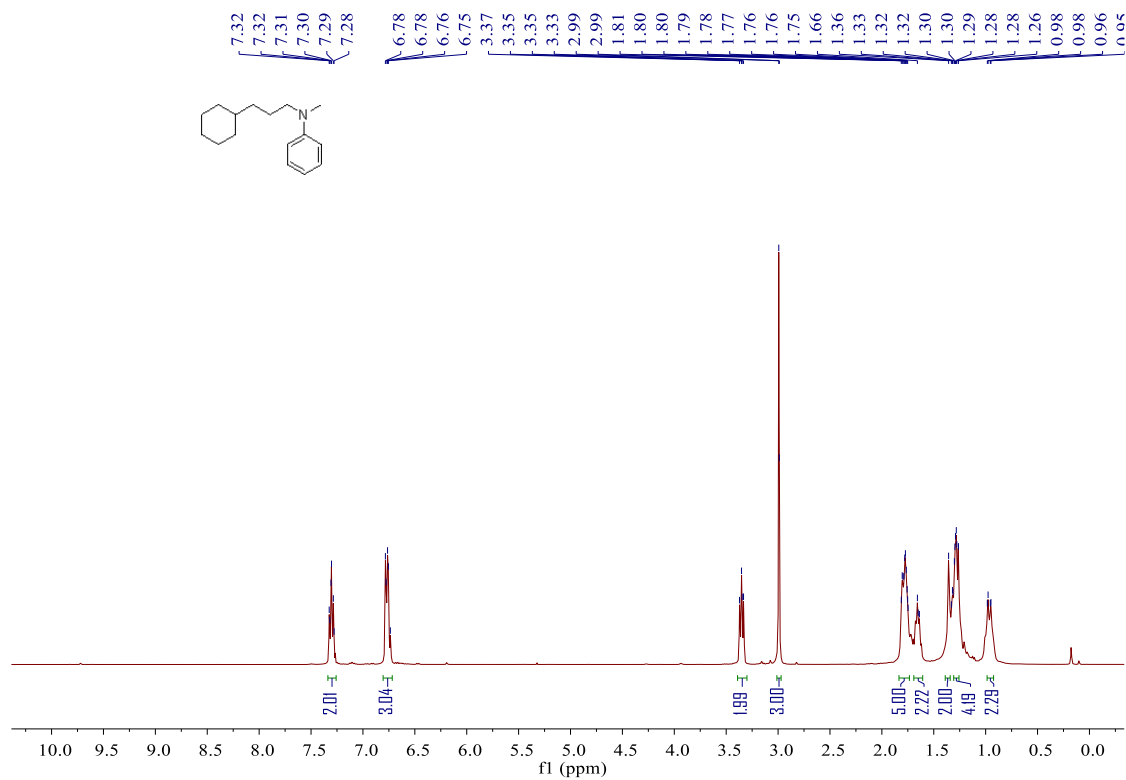

**Fig. S111.** <sup>1</sup>H NMR (400 MHz, CDCl<sub>3</sub>, 298 K) spectrum of compound **9na**.

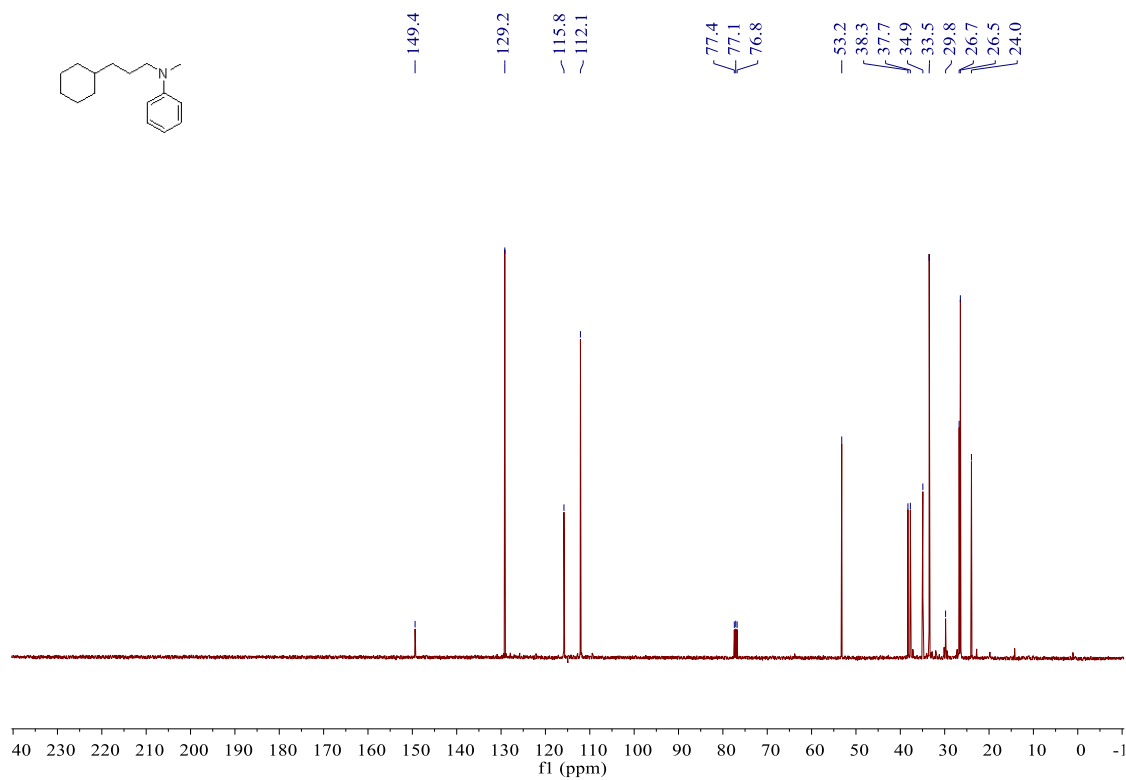

**Fig. S112.** <sup>13</sup>C NMR (101 MHz, CDCl<sub>3</sub>, 298 K) spectrum of compound **9na**.

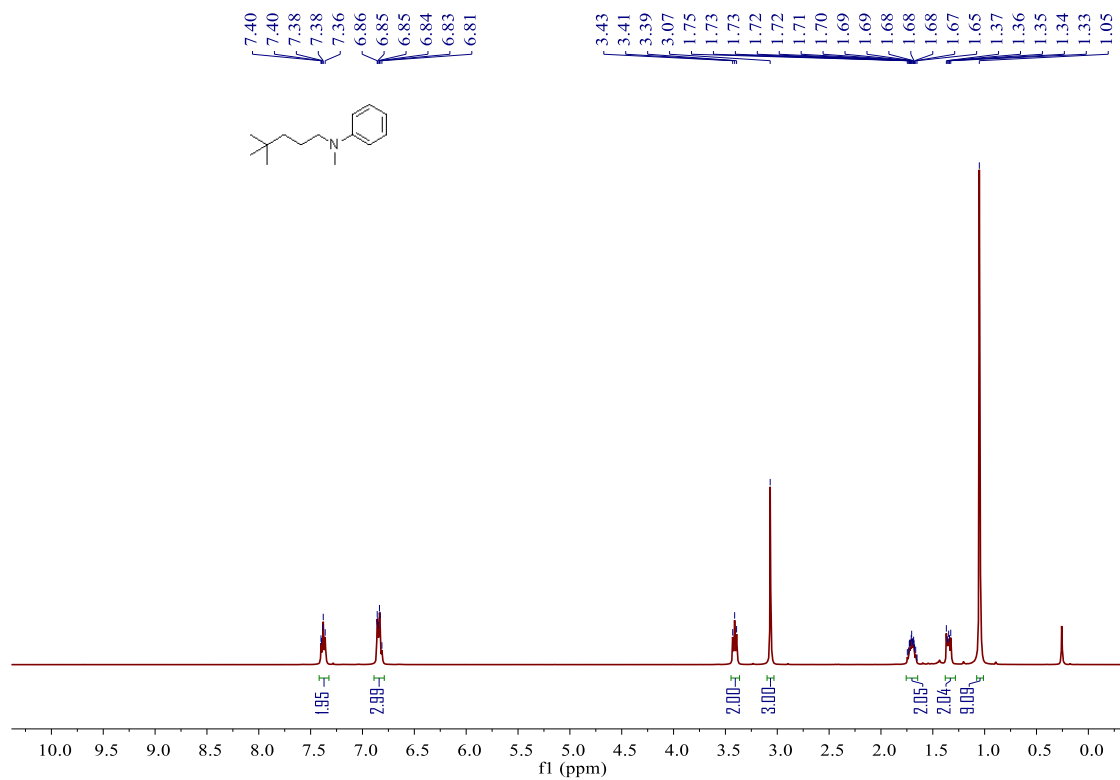

**Fig. S113.** <sup>1</sup>H NMR (400 MHz, CDCl<sub>3</sub>, 298 K) spectrum of compound **9oa**.

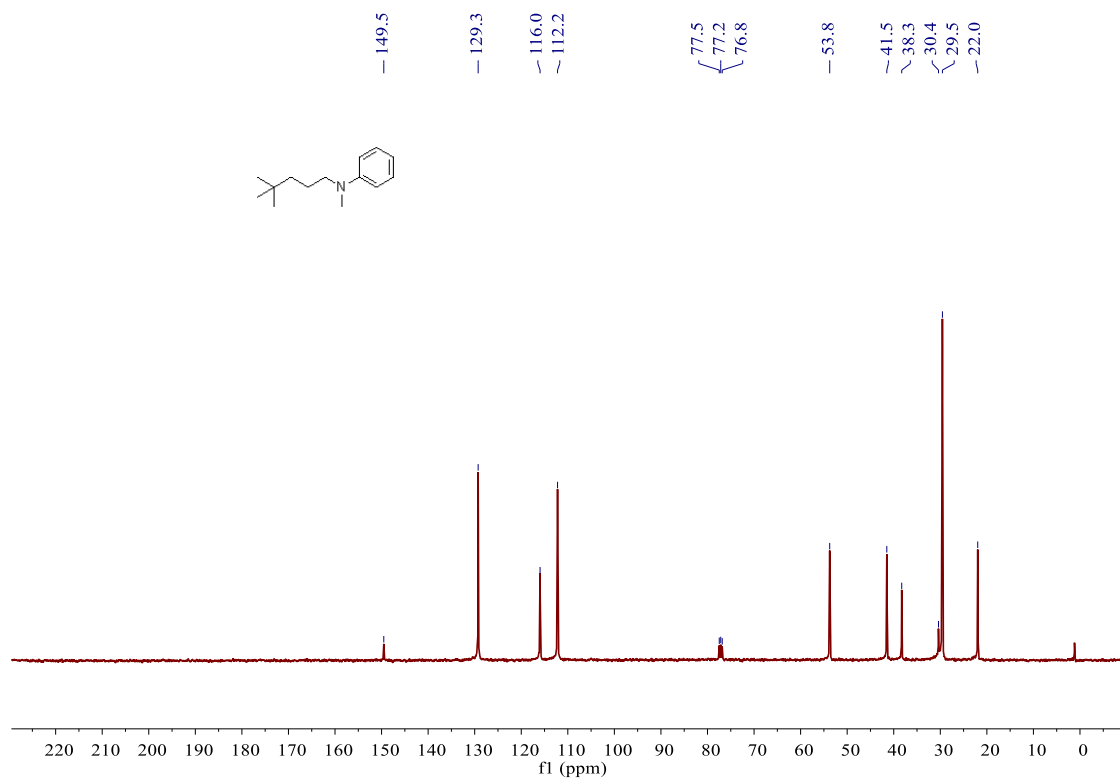

**Fig. S114.** <sup>13</sup>C NMR (101 MHz, CDCl<sub>3</sub>, 298 K) spectrum of compound **9oa**.



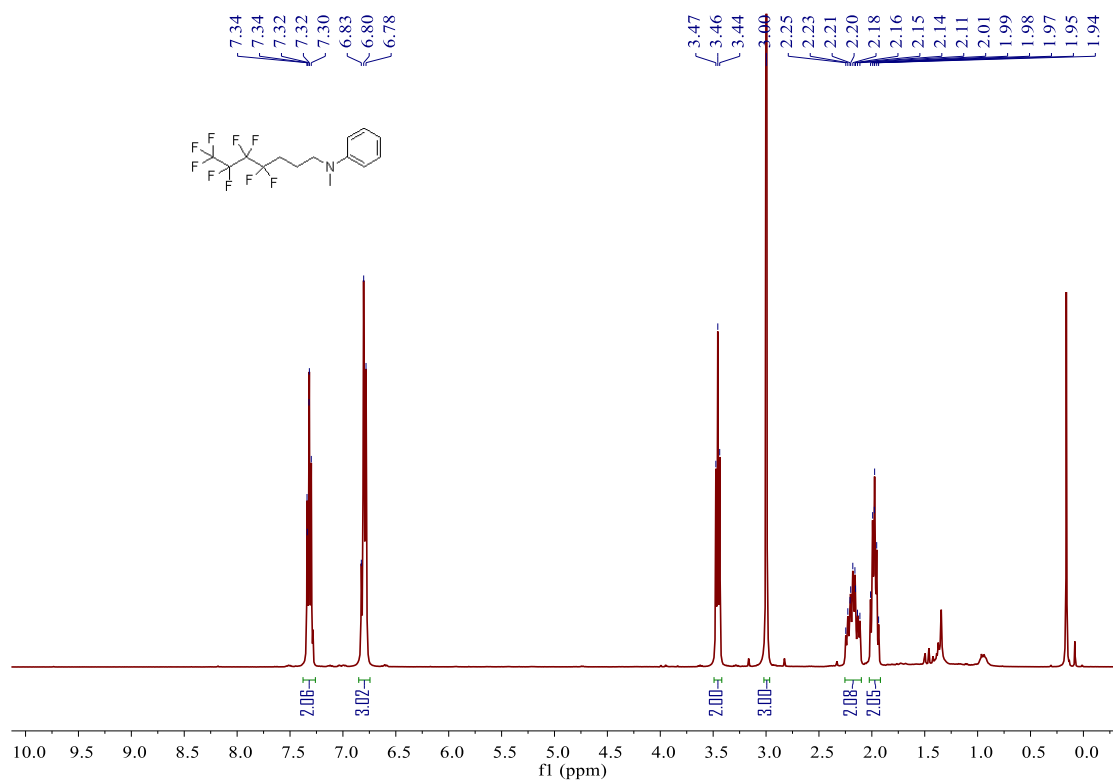

**Fig. S115.** <sup>1</sup>H NMR (400 MHz, CDCl<sub>3</sub>, 298 K) spectrum of compound **9pa**.

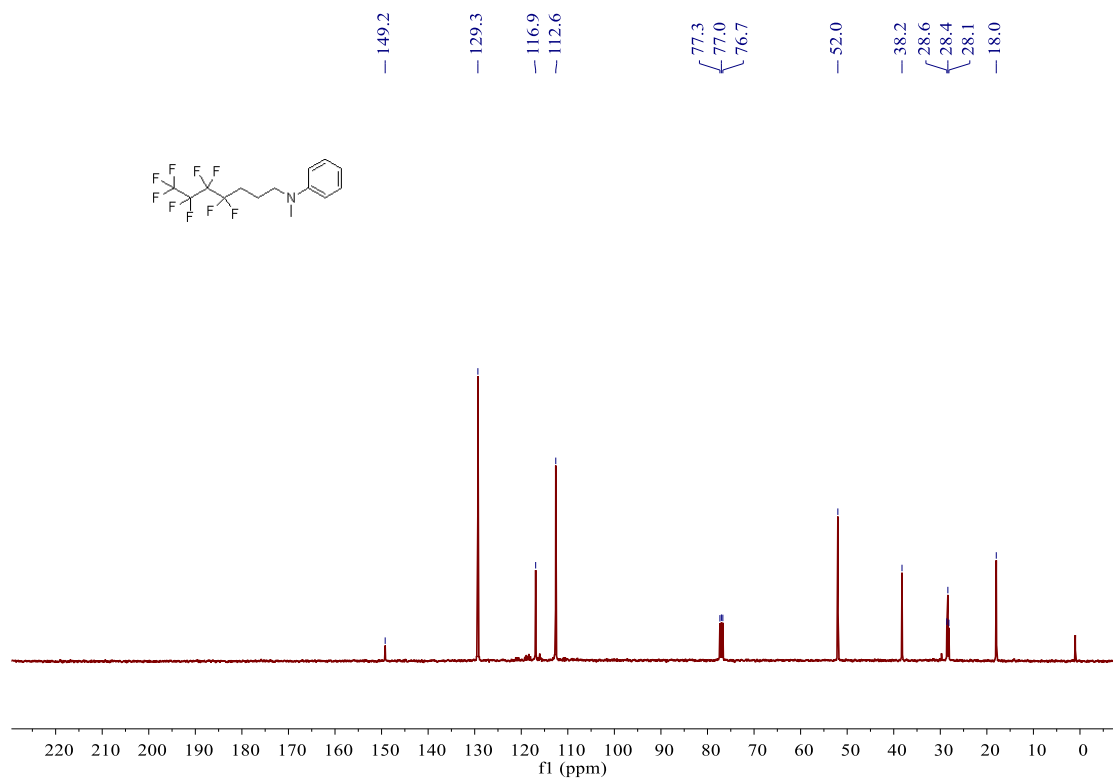

**Fig. S116.** <sup>13</sup>C NMR (101 MHz, CDCl<sub>3</sub>, 298 K) spectrum of compound **9pa**.

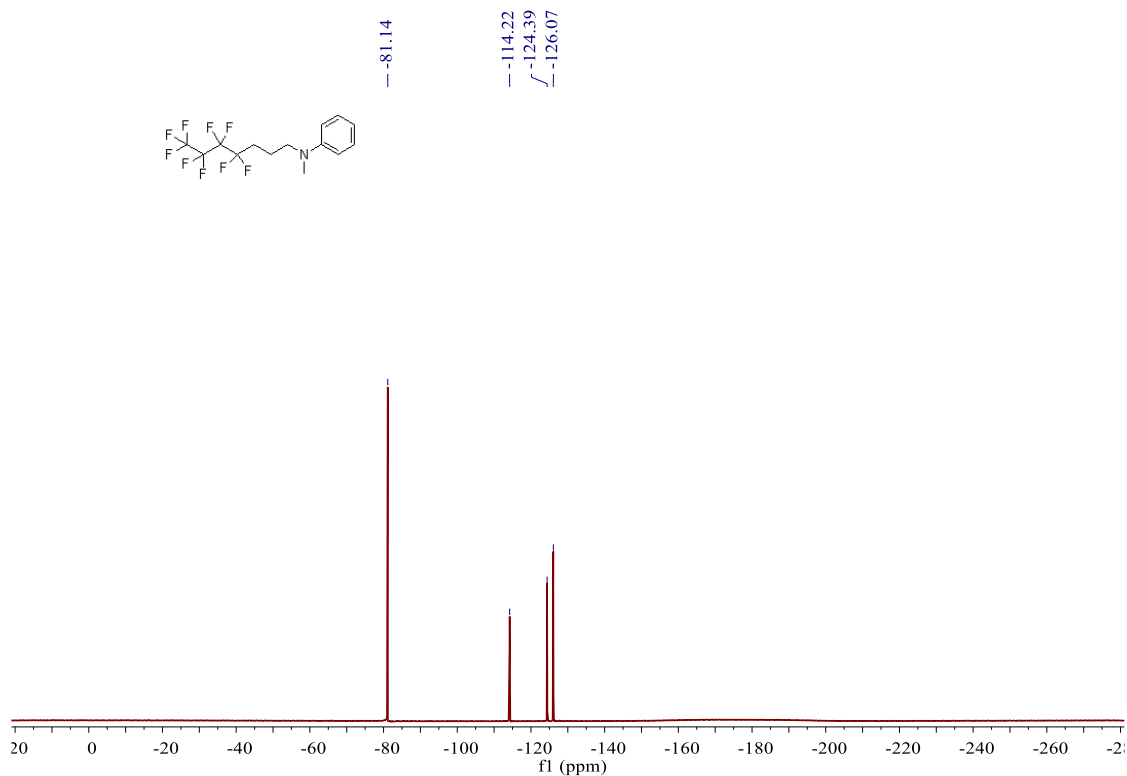

**Fig. S117.**  $^{19}\text{F}$  NMR (376 MHz,  $\text{CDCl}_3$ , 298 K) spectrum of compound **9pa**.

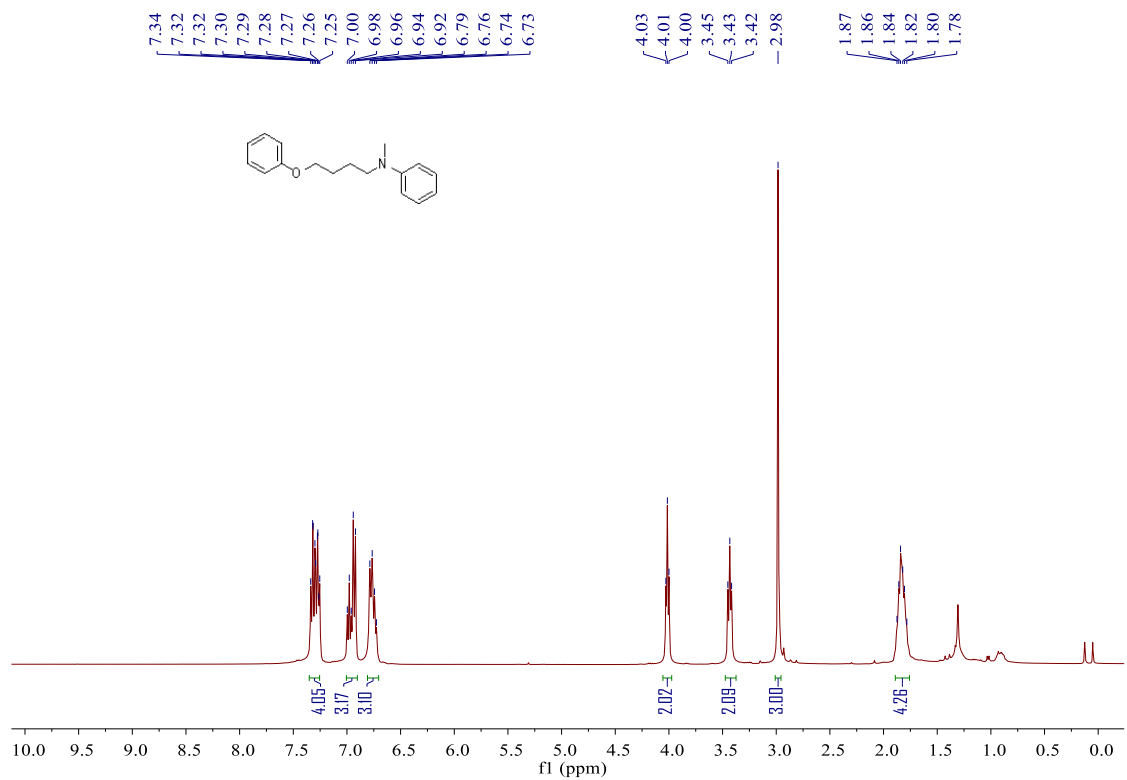

**Fig. S118.**  $^1\text{H}$  NMR (400 MHz,  $\text{CDCl}_3$ , 298 K) spectrum of compound **9qa**.

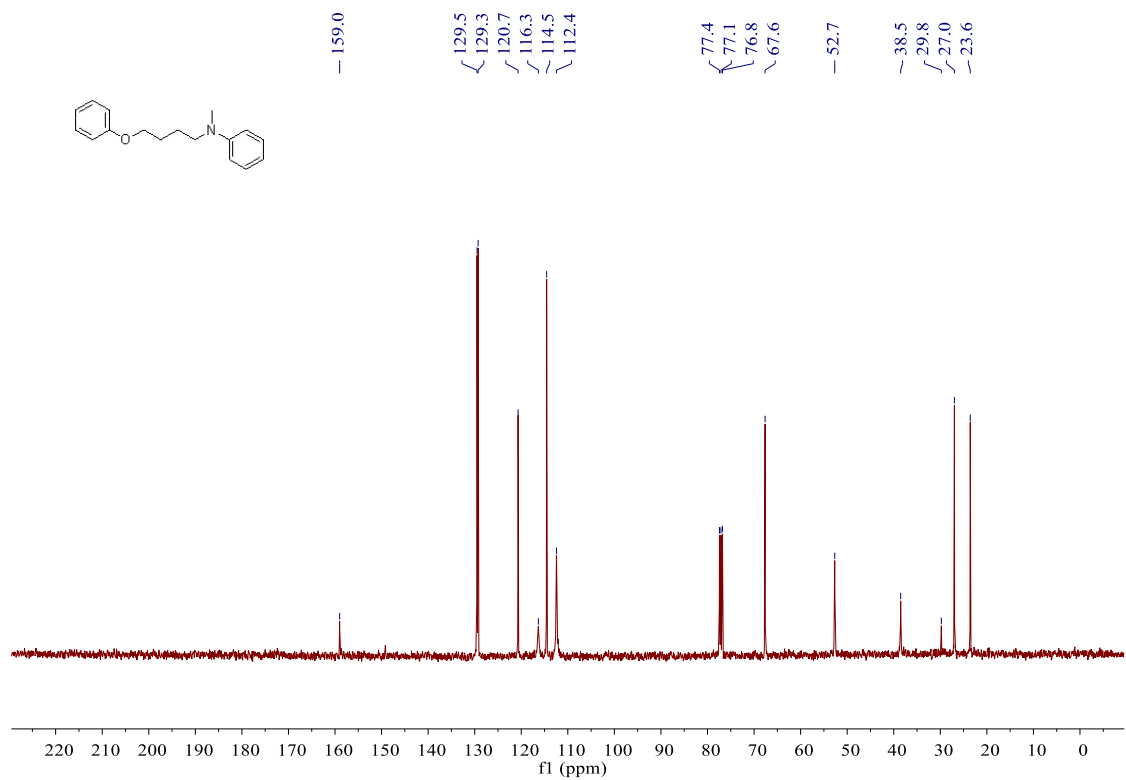

**Fig. S119.**  $^{13}\text{C}$  NMR (101 MHz,  $\text{CDCl}_3$ , 298 K) spectrum of compound **9qa**.

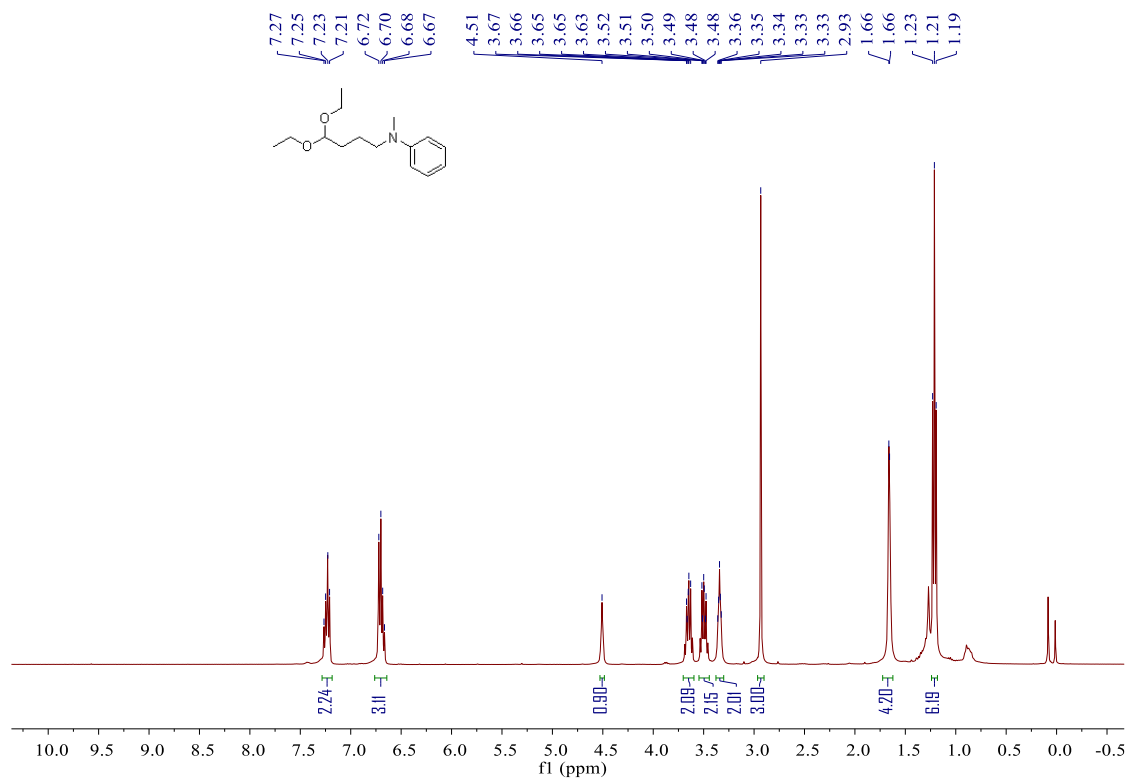

**Fig. S120.**  $^1\text{H}$  NMR (400 MHz,  $\text{CDCl}_3$ , 298 K) spectrum of compound **9ra**.

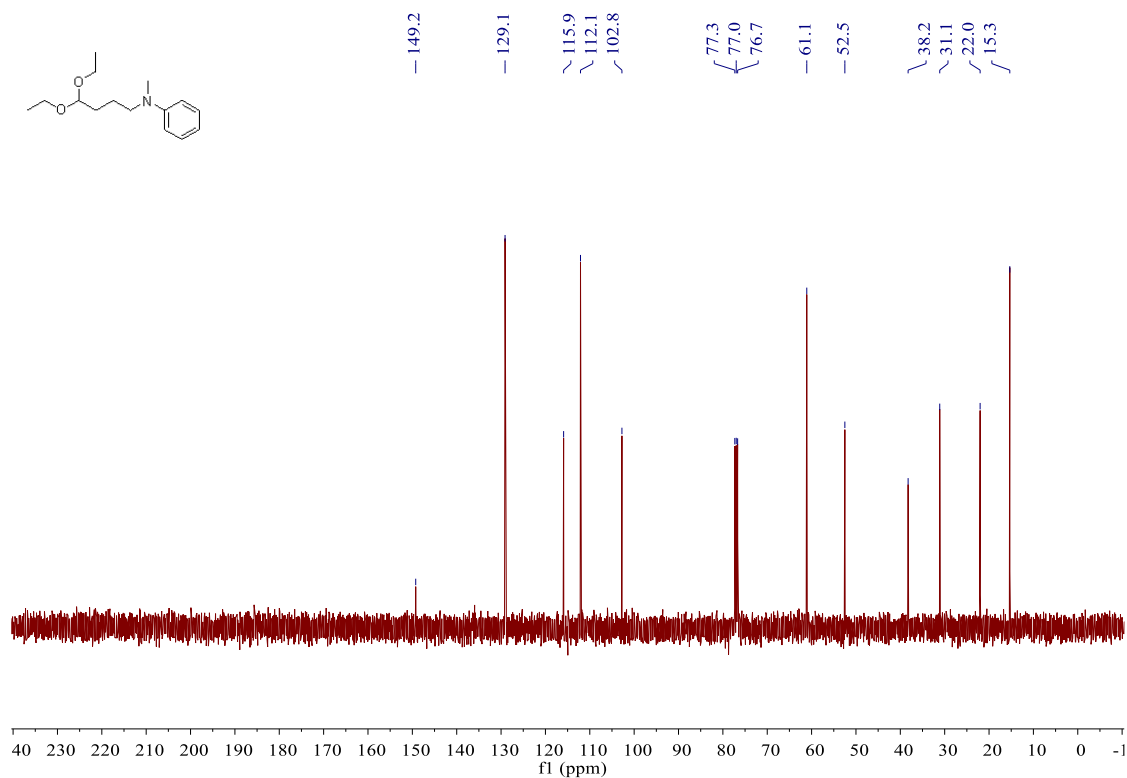

**Fig. S121.**  $^{13}\text{C}$  NMR (101 MHz,  $\text{CDCl}_3$ , 298 K) spectrum of compound **9ra**.

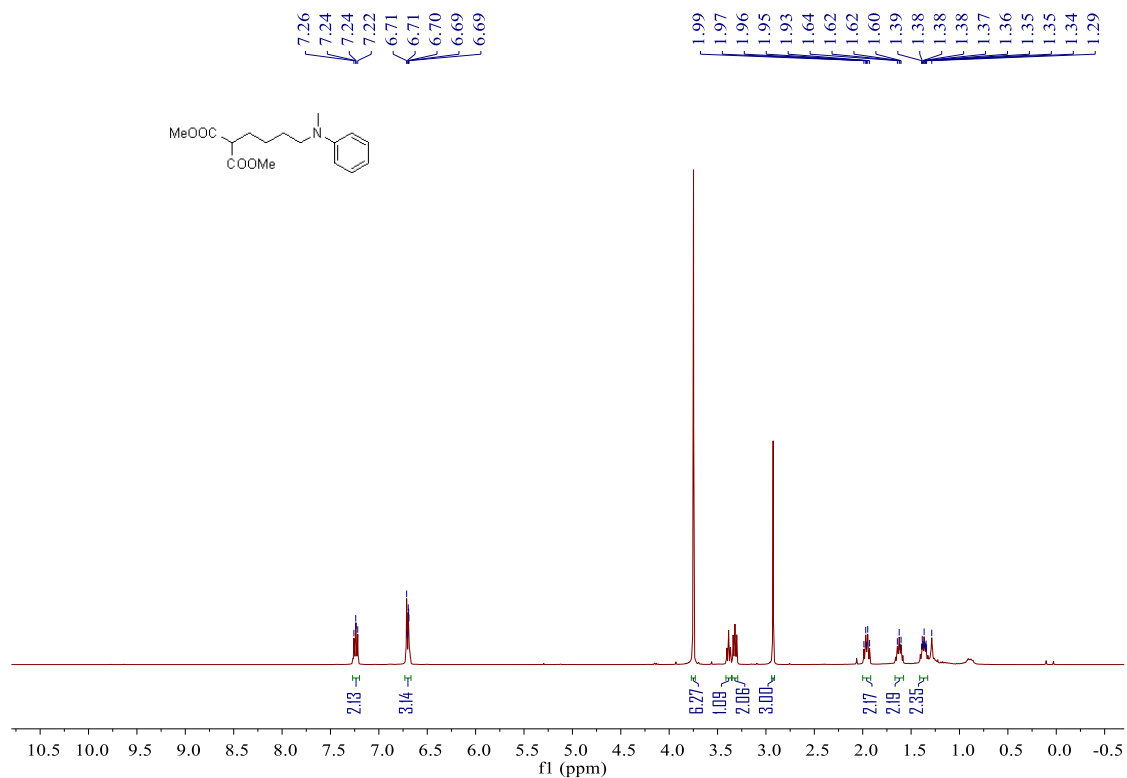

**Fig. S122.**  $^1\text{H}$  NMR (400 MHz,  $\text{CDCl}_3$ , 298 K) spectrum of compound **9sa**.

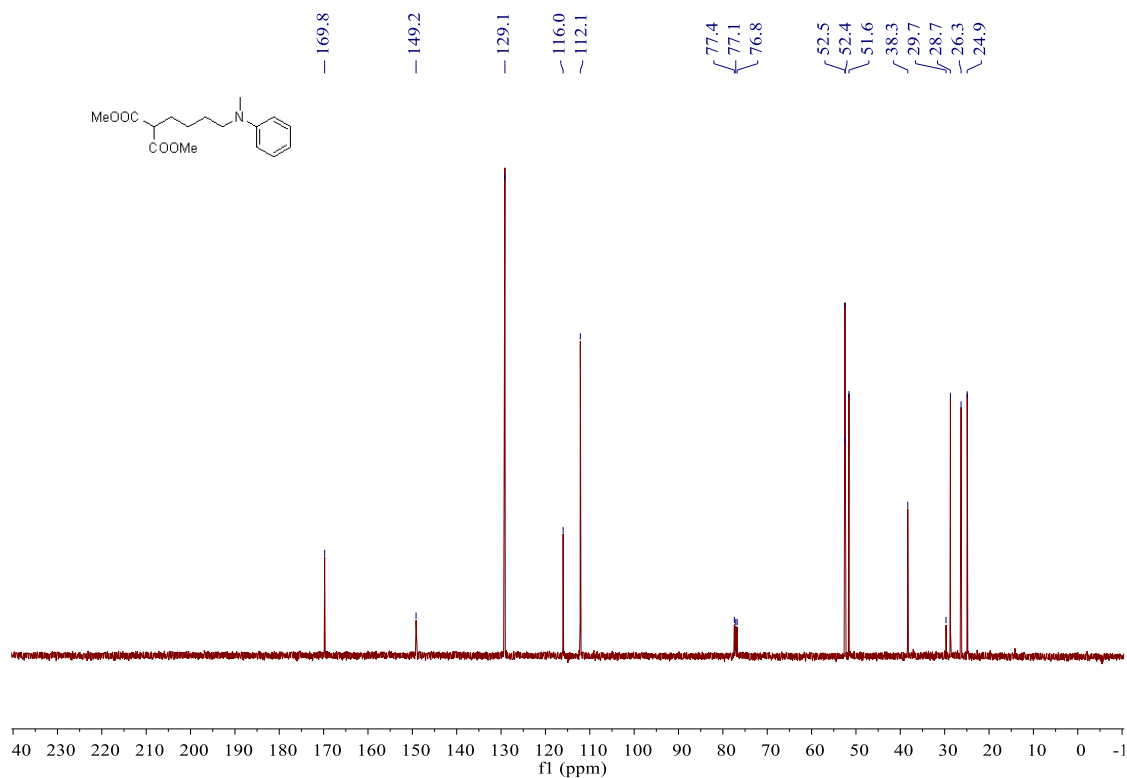

**Fig. S123.**  $^{13}\text{C}$  NMR (101 MHz,  $\text{CDCl}_3$ , 298 K) spectrum of compound **9sa**.

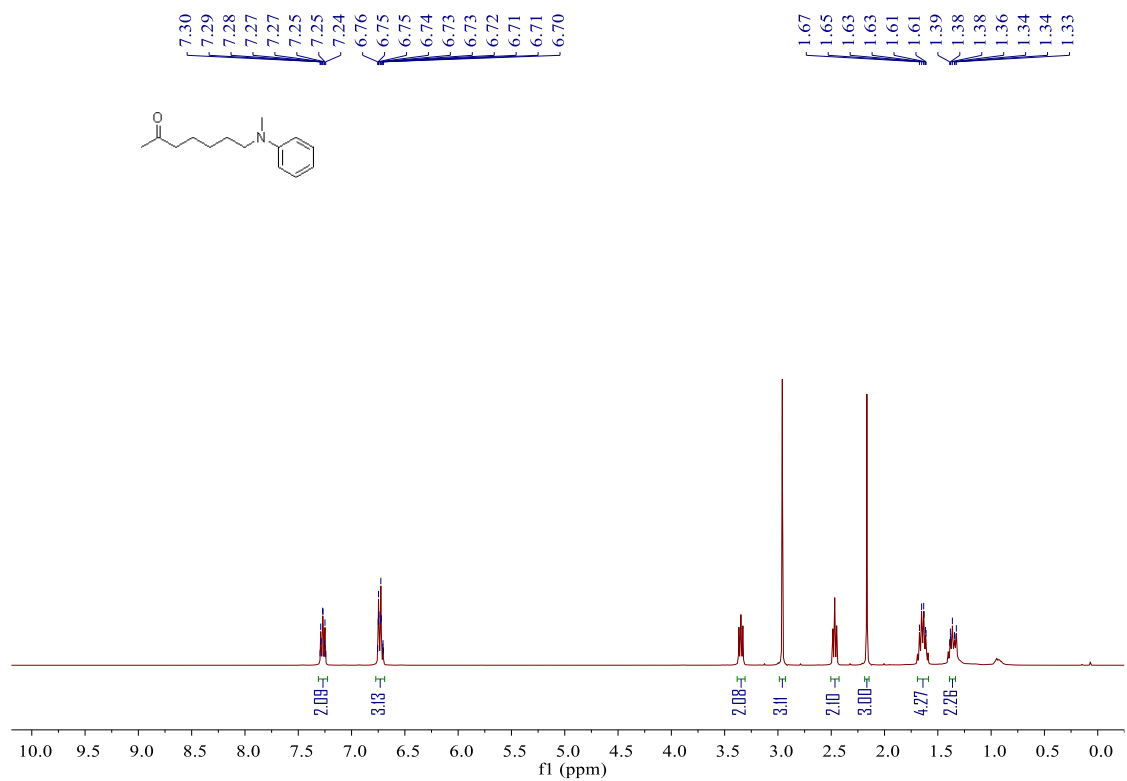

**Fig. S124.**  $^1\text{H}$  NMR (400 MHz,  $\text{CDCl}_3$ , 298 K) spectrum of compound **9ta**.

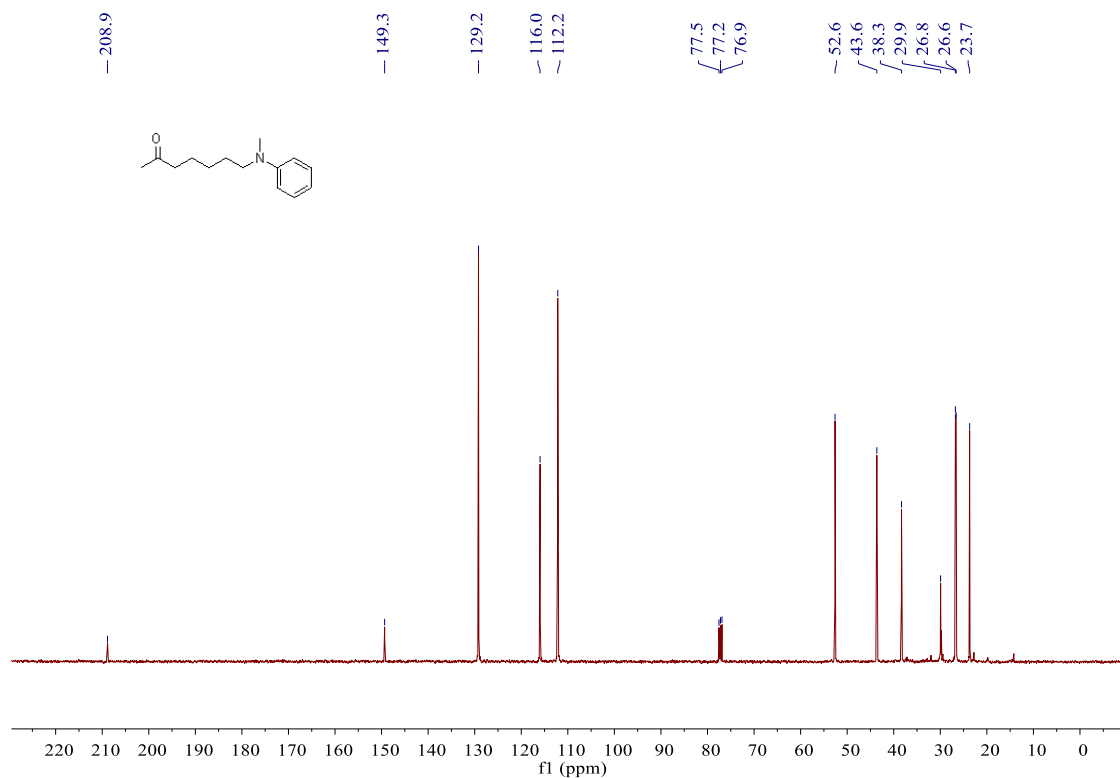

**Fig. S125.**  $^{13}\text{C}$  NMR (101 MHz,  $\text{CDCl}_3$ , 298 K) spectrum of compound **9ta**.

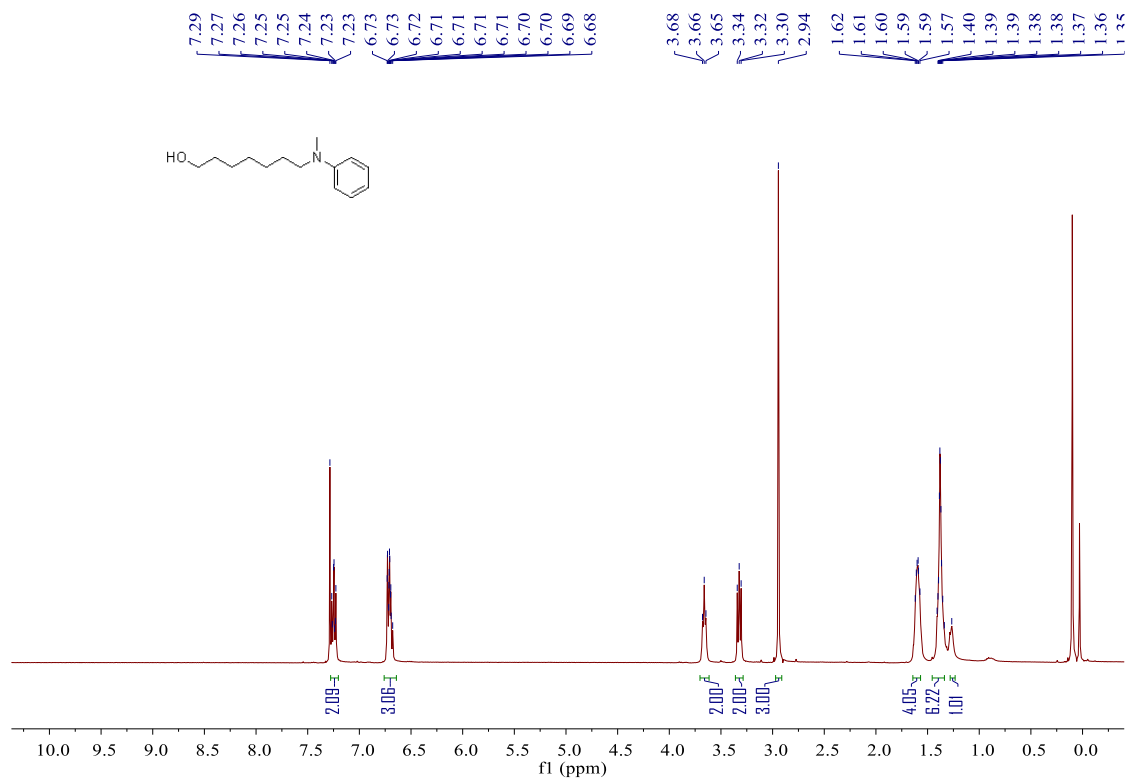

**Fig. S126.**  $^1\text{H}$  NMR (400 MHz,  $\text{CDCl}_3$ , 298 K) spectrum of compound **9ua**.

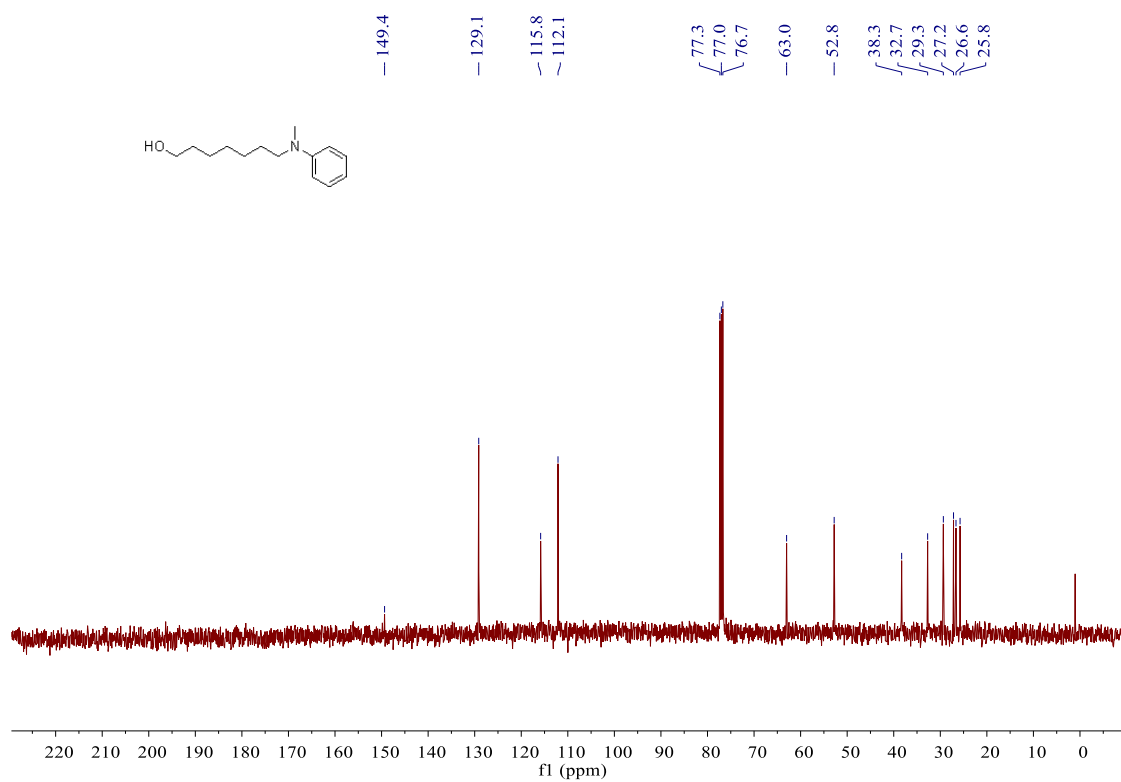

**Fig. S127.**  $^{13}\text{C}$  NMR (101 MHz,  $\text{CDCl}_3$ , 298 K) spectrum of compound **9ua**.

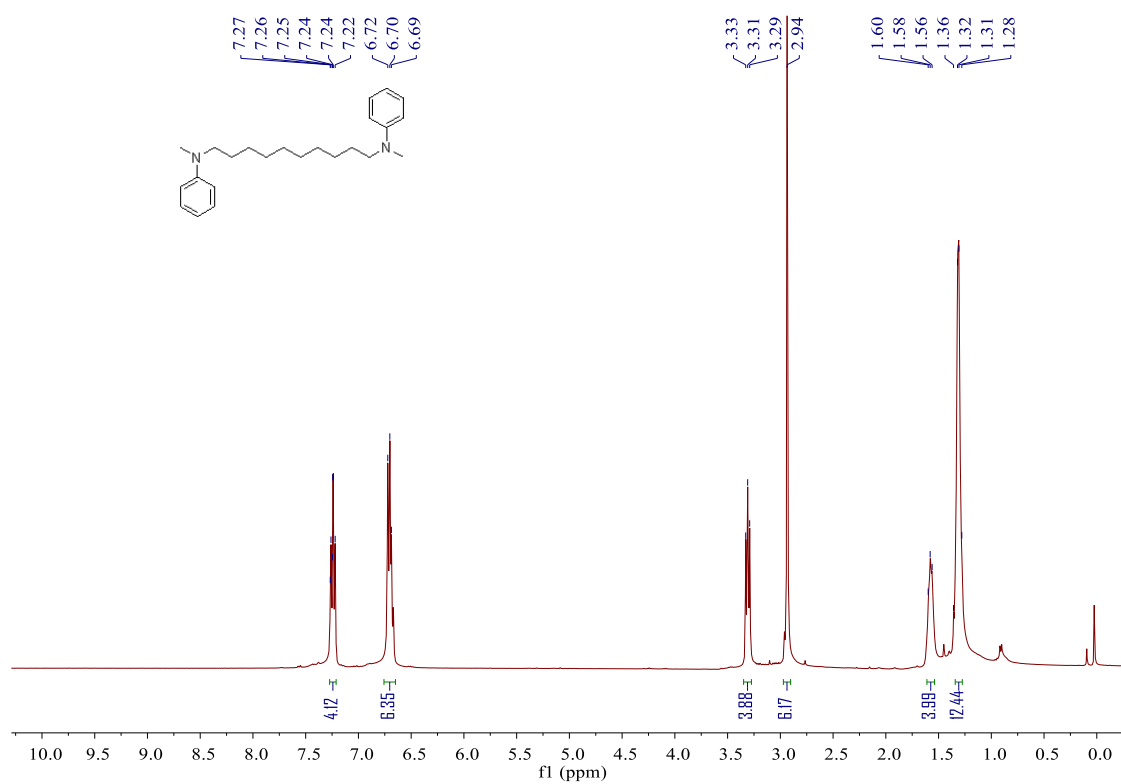

**Fig. S128.**  $^1\text{H}$  NMR (400 MHz,  $\text{CDCl}_3$ , 298 K) spectrum of compound **9va**.

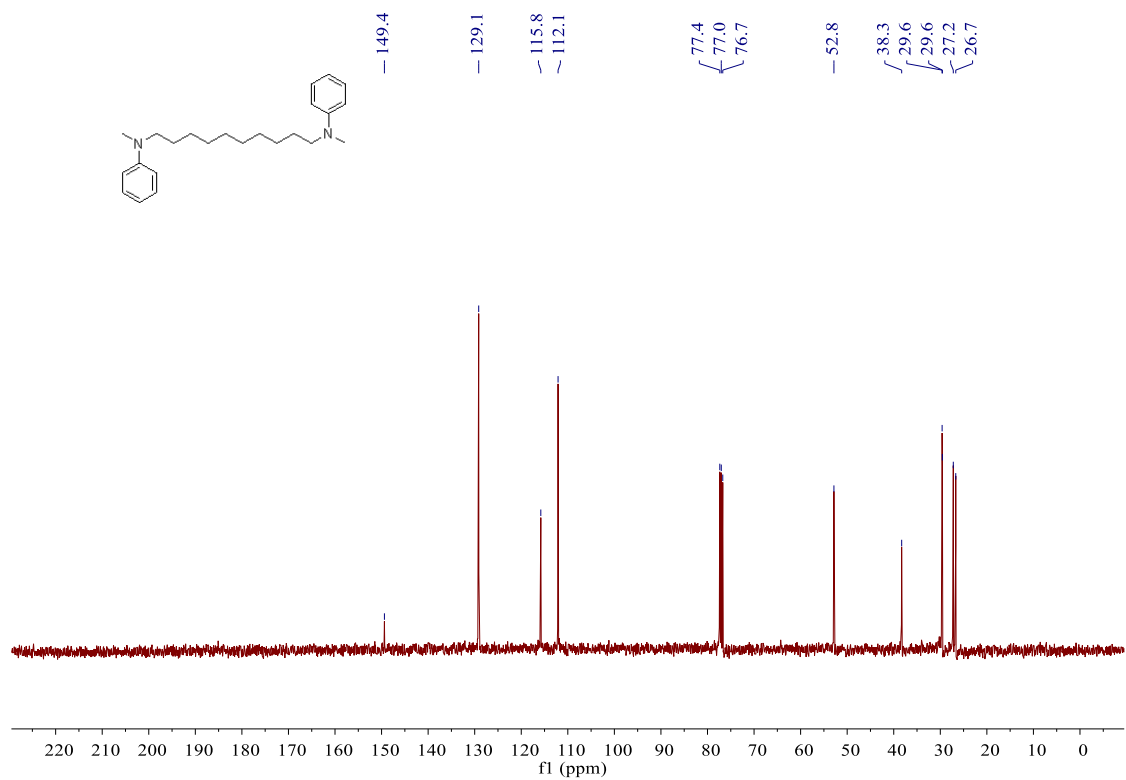

Fig. S129. <sup>13</sup>C NMR (101 MHz, CDCl<sub>3</sub>, 298 K) spectrum of compound 9va.

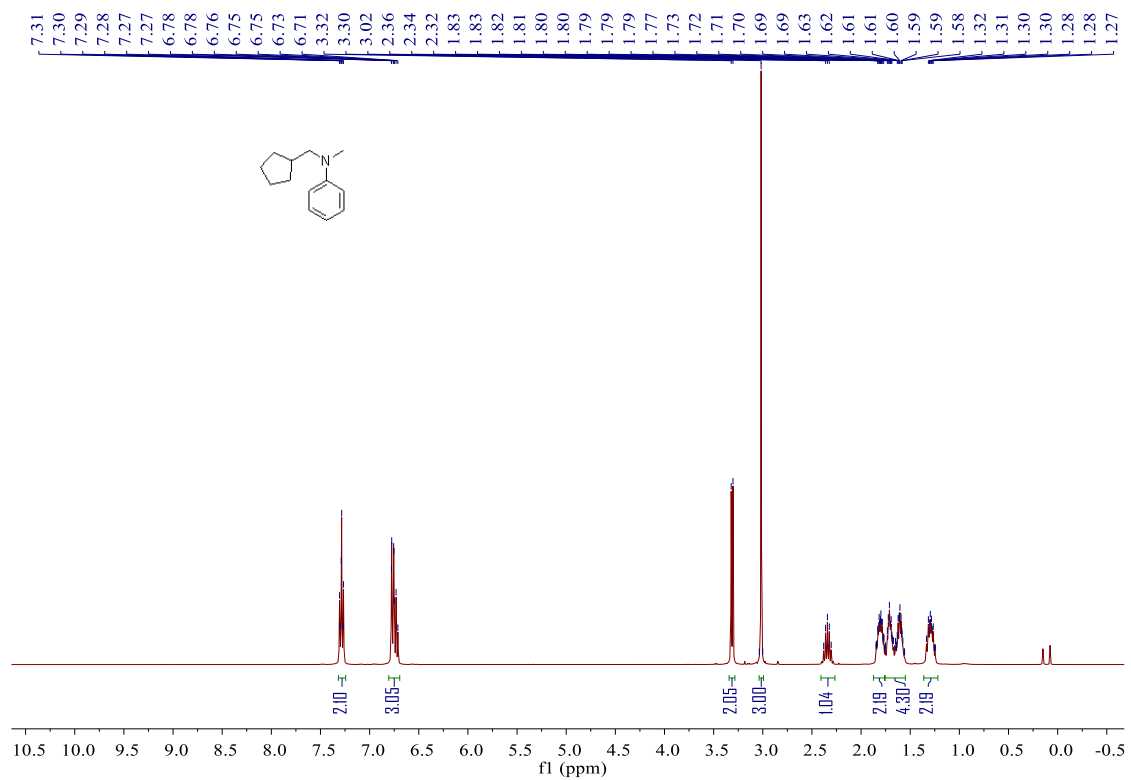

Fig. S130. <sup>1</sup>H NMR (400 MHz, CDCl<sub>3</sub>, 298 K) spectrum of compound 9wa-5.



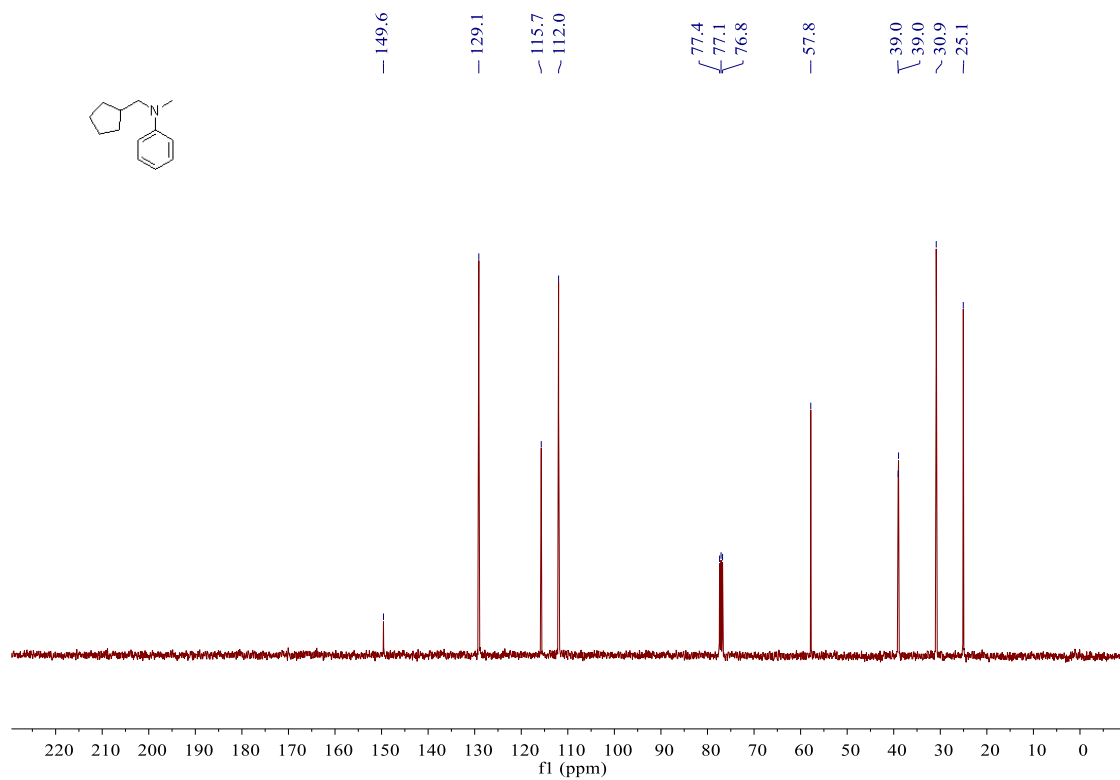

**Fig. S131.** <sup>13</sup>C NMR (101 MHz, CDCl<sub>3</sub>, 298 K) spectrum of compound **9wa-5**.

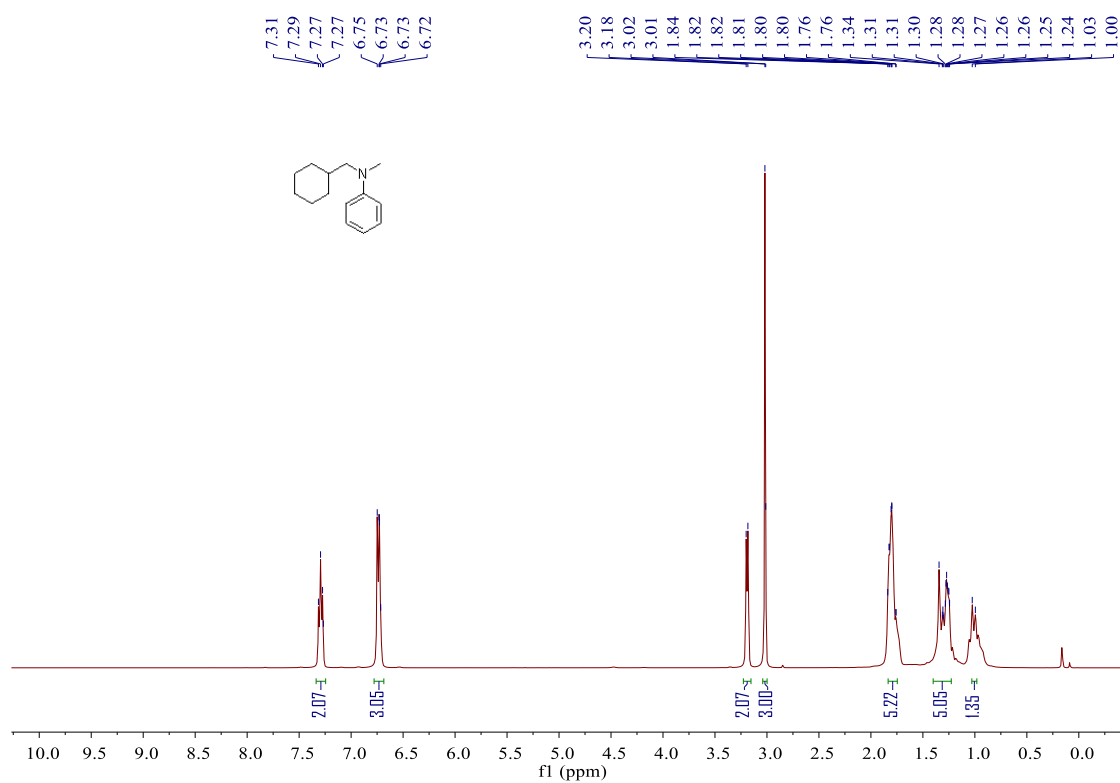

**Fig. S132.** <sup>1</sup>H NMR (400 MHz, CDCl<sub>3</sub>, 298 K) spectrum of compound **9wa-6**.

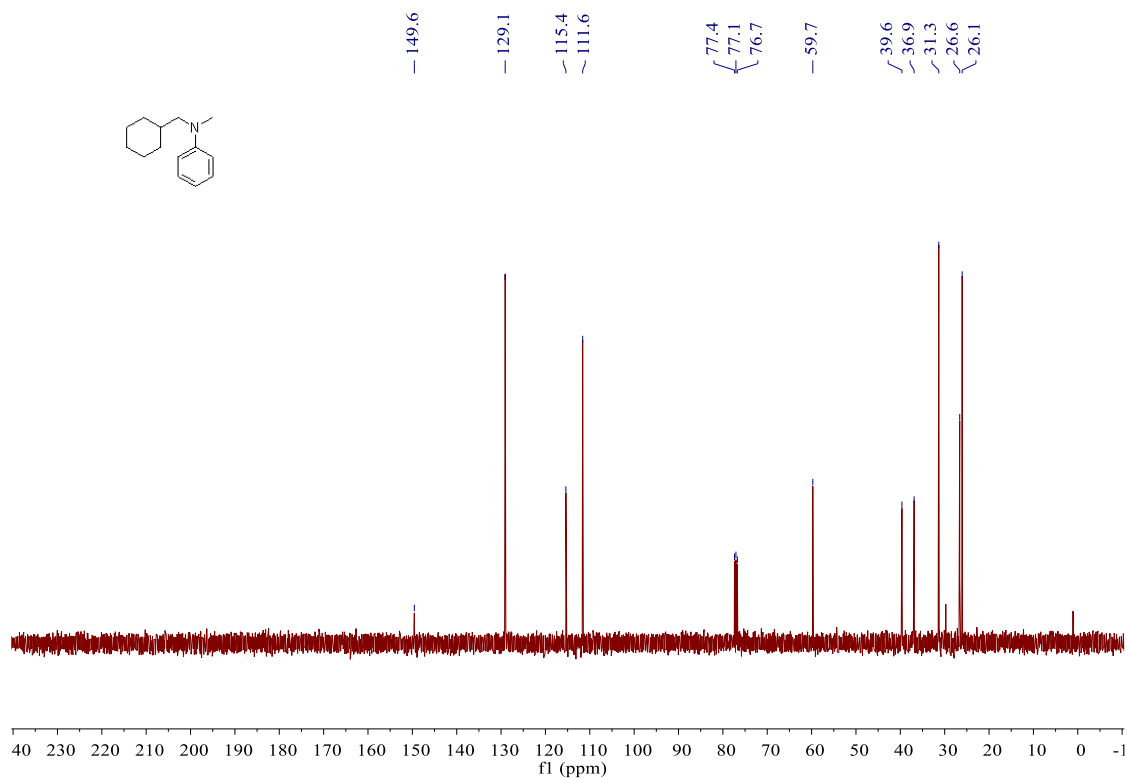

Fig. S133.  $^{13}\text{C}$  NMR (101 MHz,  $\text{CDCl}_3$ , 298 K) spectrum of compound 9wa-6.

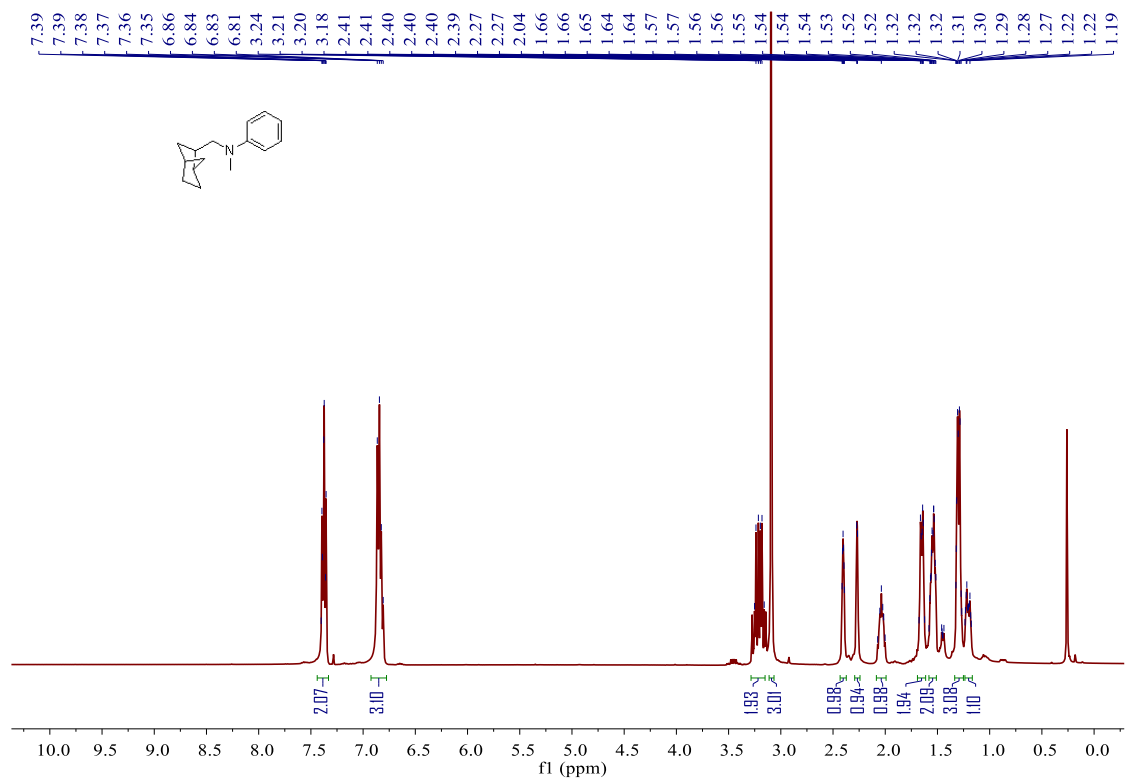

Fig. S134.  $^1\text{H}$  NMR (400 MHz,  $\text{CDCl}_3$ , 298 K) spectrum of compound 9xa.

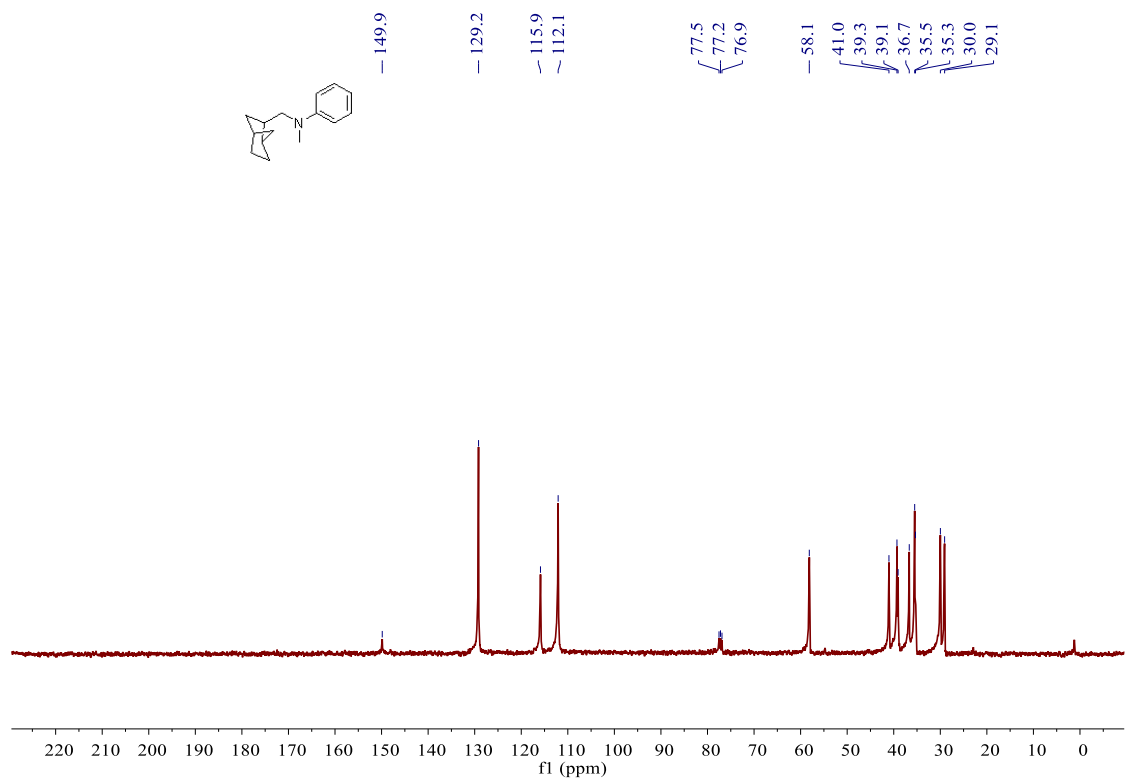

Fig. S135. <sup>13</sup>C NMR (101 MHz, CDCl<sub>3</sub>, 298 K) spectrum of compound 9xa.

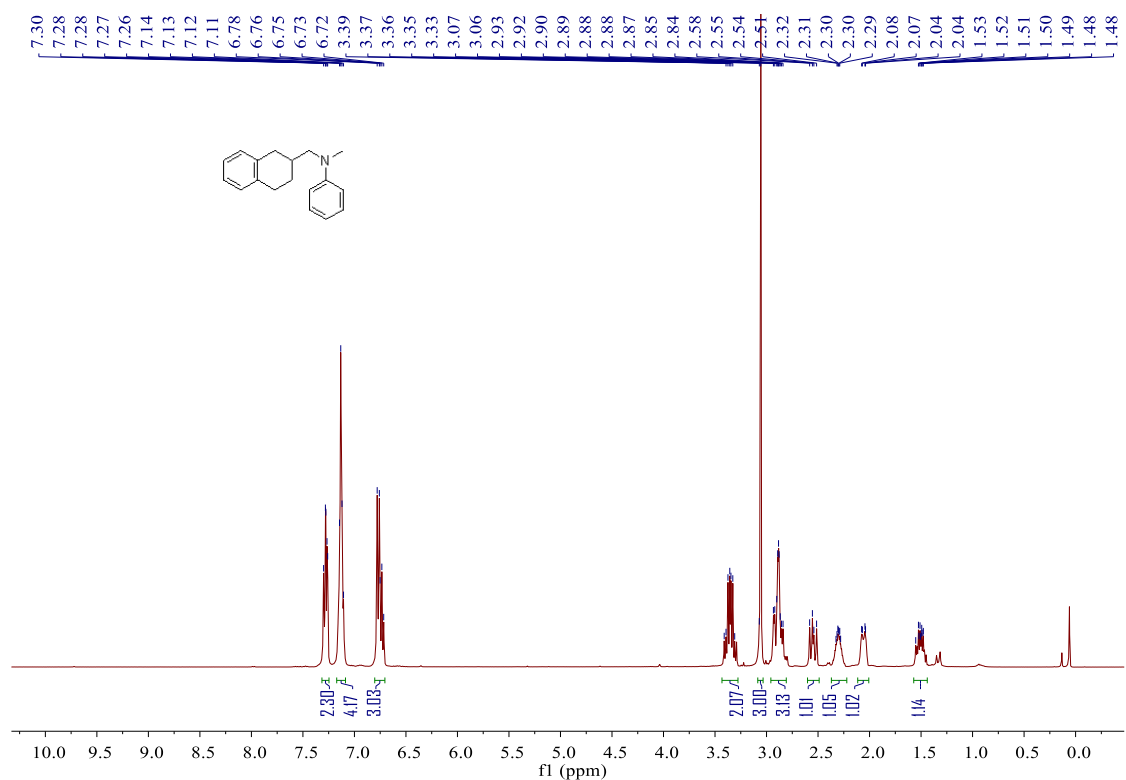

Fig. S136. <sup>1</sup>H NMR (400 MHz, CDCl<sub>3</sub>, 298 K) spectrum of compound 9ya.

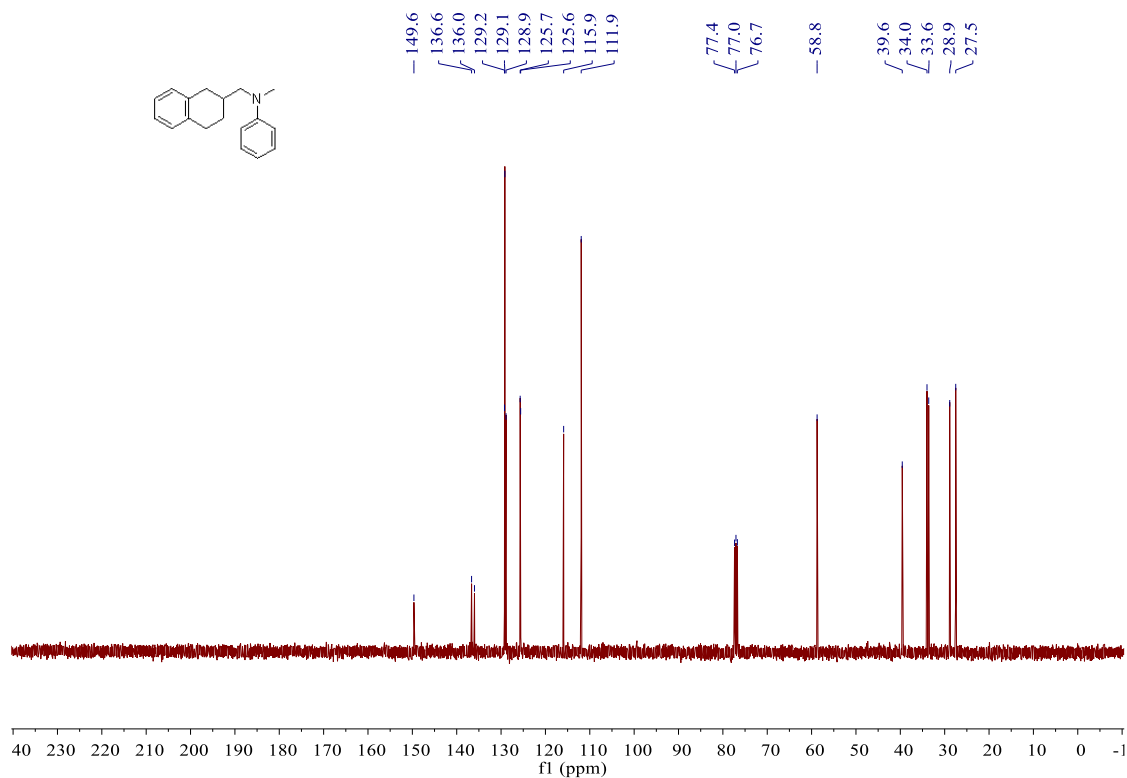

Fig. S137.  $^{13}\text{C}$  NMR (101 MHz,  $\text{CDCl}_3$ , 298 K) spectrum of compound 9ya.

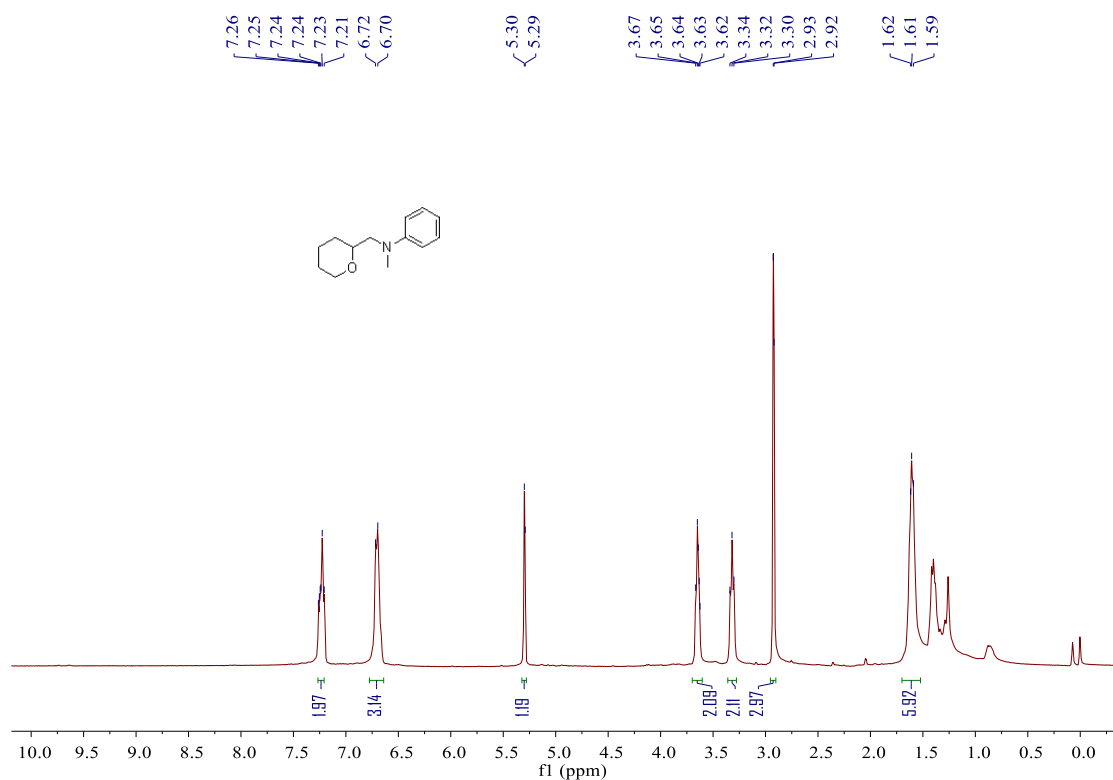

Fig. S138.  $^1\text{H}$  NMR (400 MHz,  $\text{CDCl}_3$ , 298 K) spectrum of compound 9za.

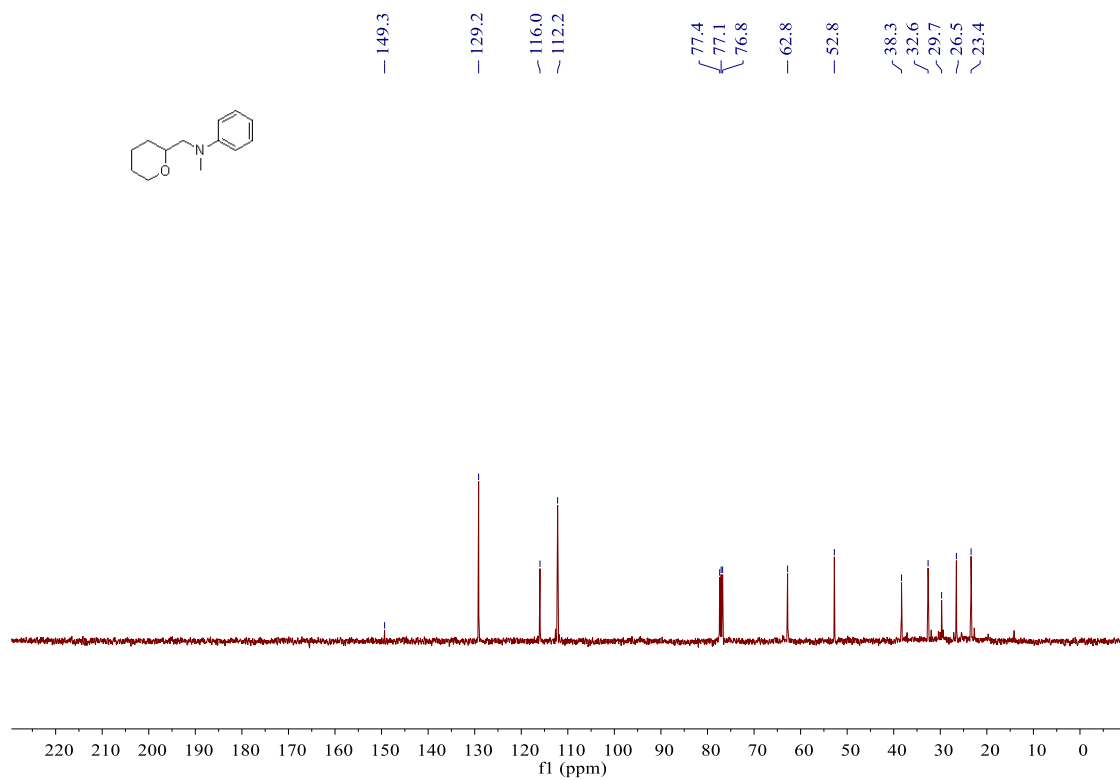

**Fig. S139.**  $^{13}\text{C}$  NMR (101 MHz,  $\text{CDCl}_3$ , 298 K) spectrum of compound **9za**.

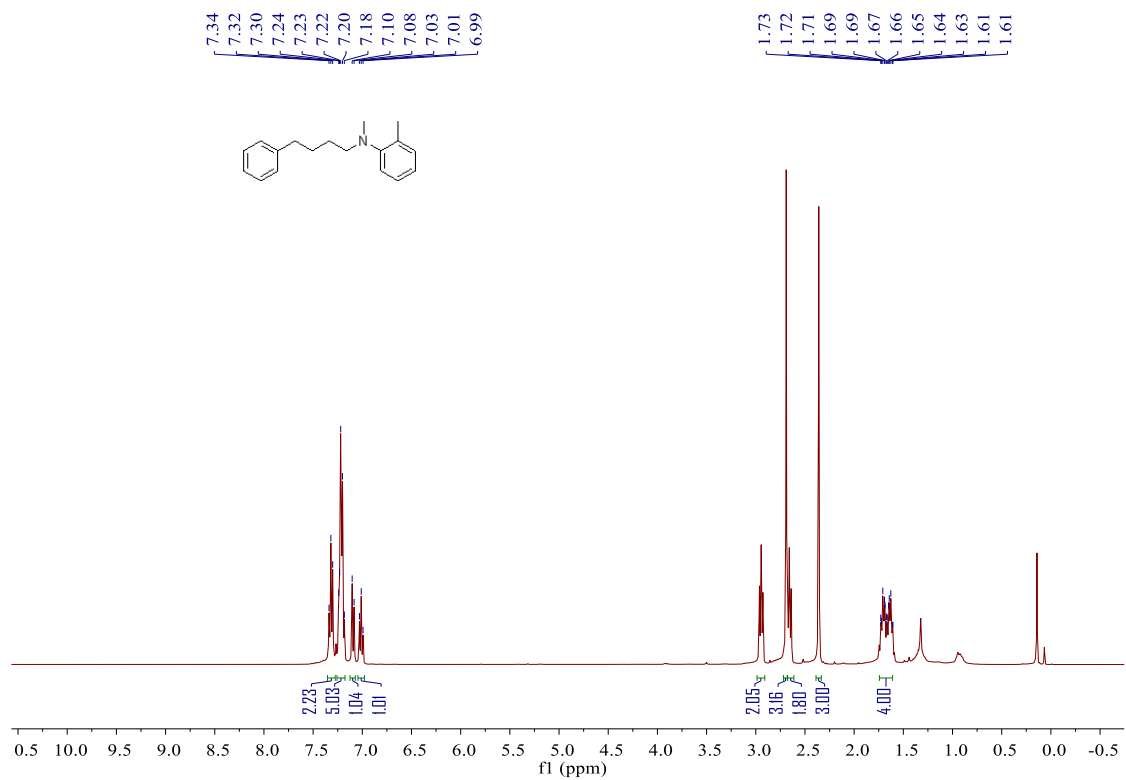

**Fig. S140.**  $^1\text{H}$  NMR (400 MHz,  $\text{CDCl}_3$ , 298 K) spectrum of compound **9ab**.

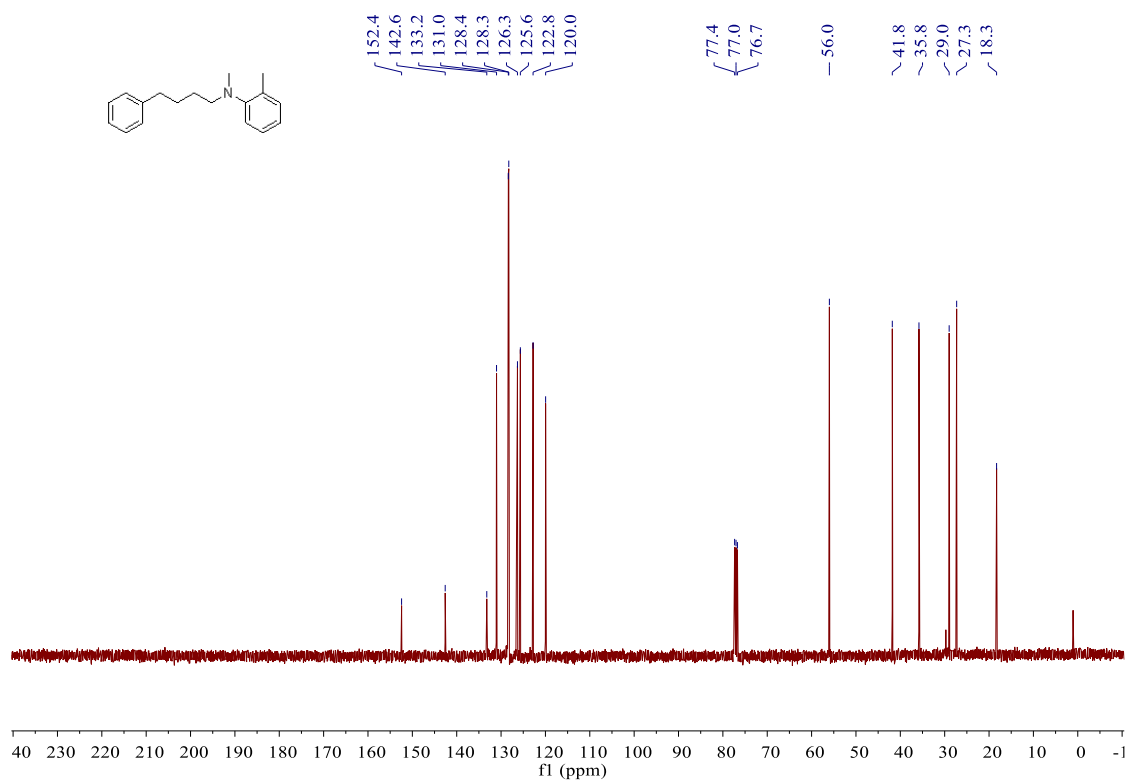

Fig. S141. <sup>13</sup>C NMR (101 MHz, CDCl<sub>3</sub>, 298 K) spectrum of compound **9ab**.

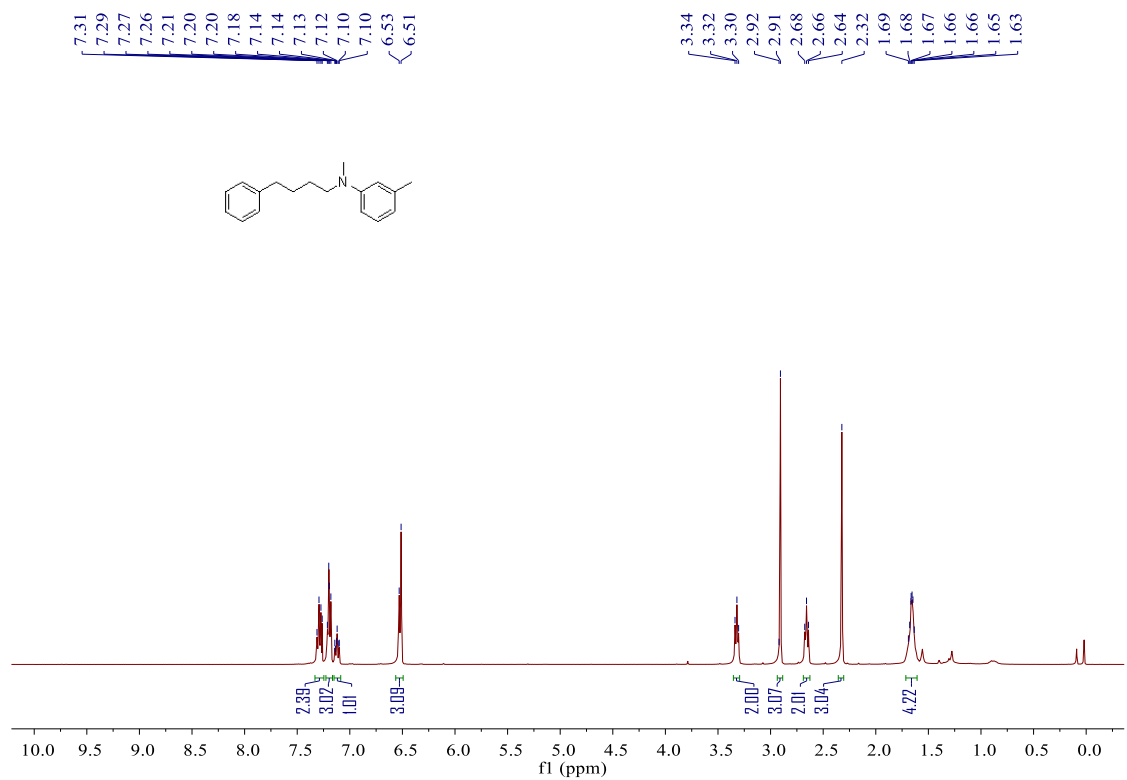

Fig. S142. <sup>1</sup>H NMR (400 MHz, CDCl<sub>3</sub>, 298 K) spectrum of compound **9ac**.

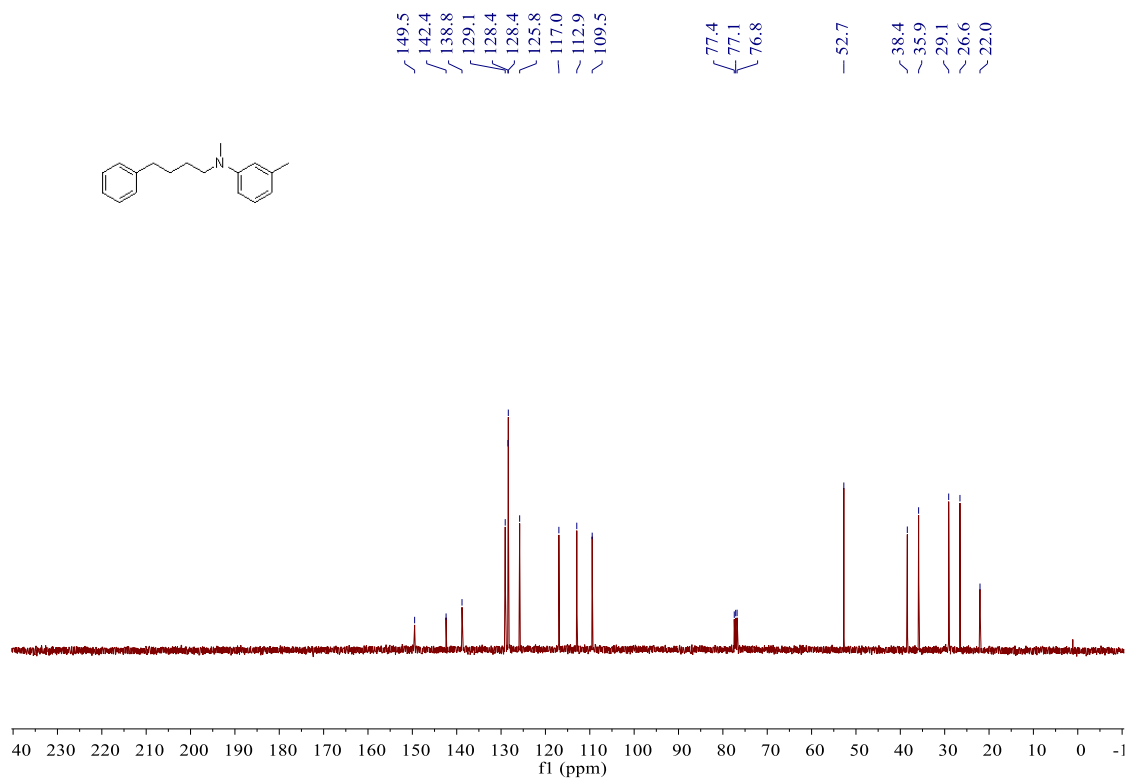

Fig. S143.  $^{13}\text{C}$  NMR (101 MHz,  $\text{CDCl}_3$ , 298 K) spectrum of compound **9ac**.

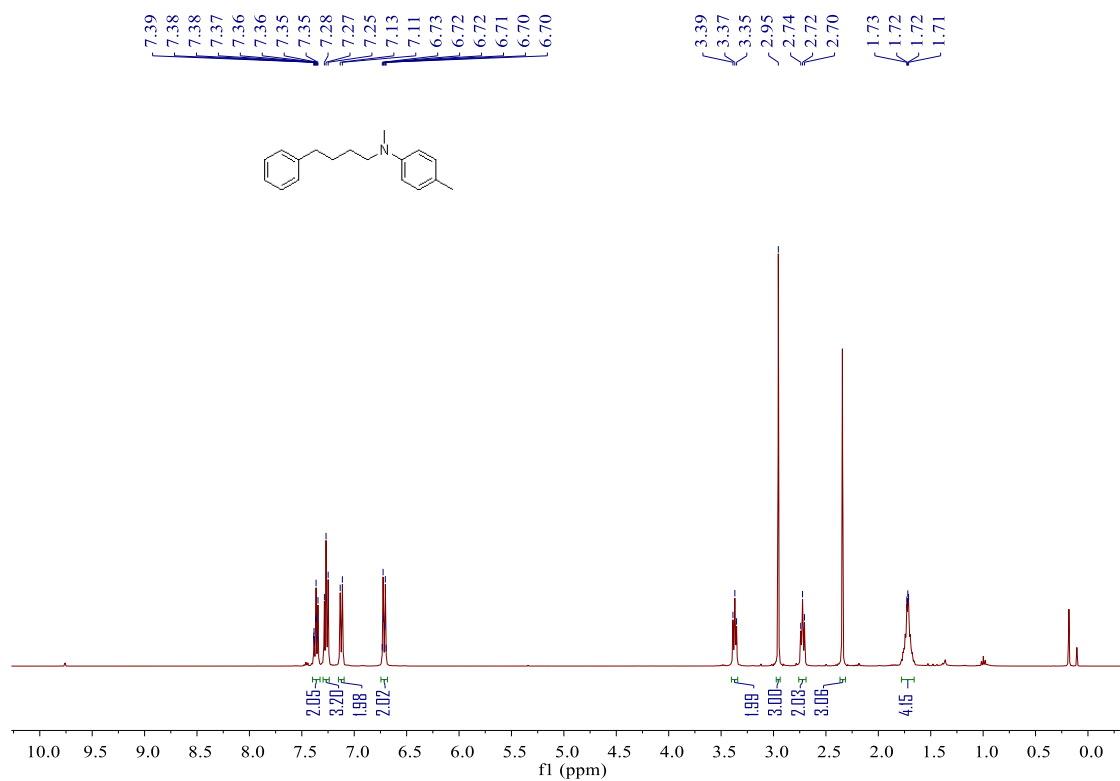

Fig. S144.  $^1\text{H}$  NMR (400 MHz,  $\text{CDCl}_3$ , 298 K) spectrum of compound **9ad**.

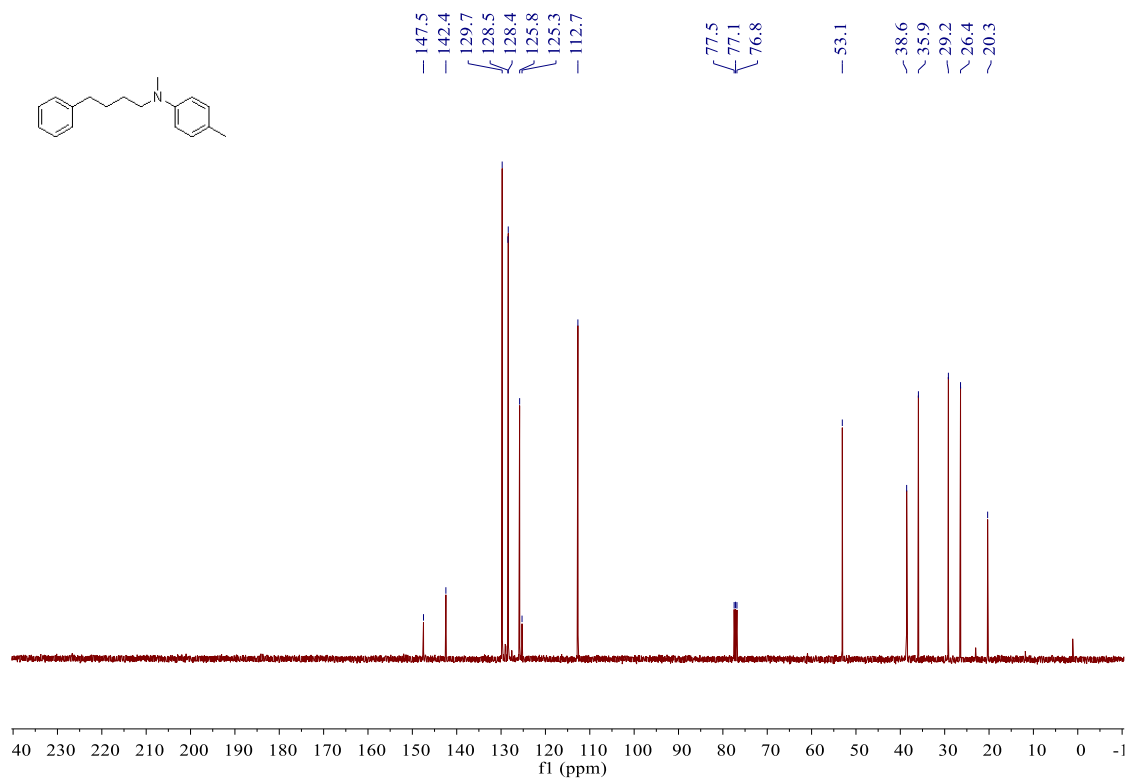

Fig. S145.  $^{13}\text{C}$  NMR (101 MHz,  $\text{CDCl}_3$ , 298 K) spectrum of compound **9ad**.

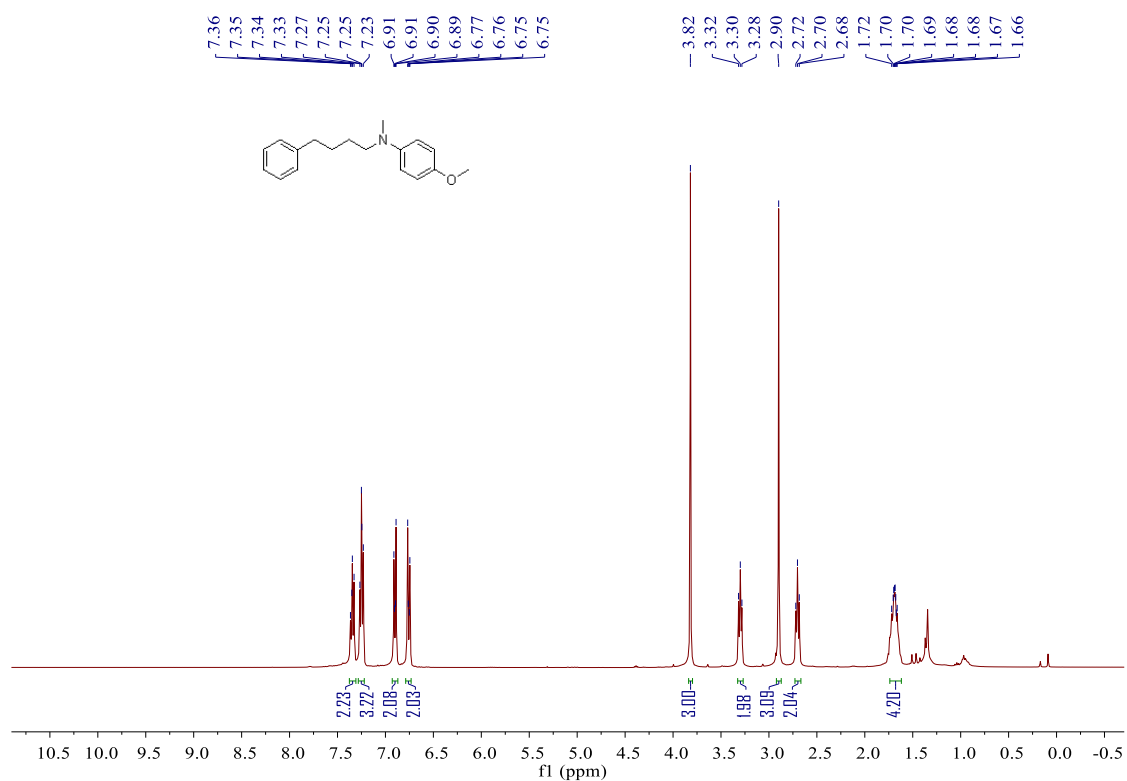

Fig. S146.  $^1\text{H}$  NMR (400 MHz,  $\text{CDCl}_3$ , 298 K) spectrum of compound **9ae**.



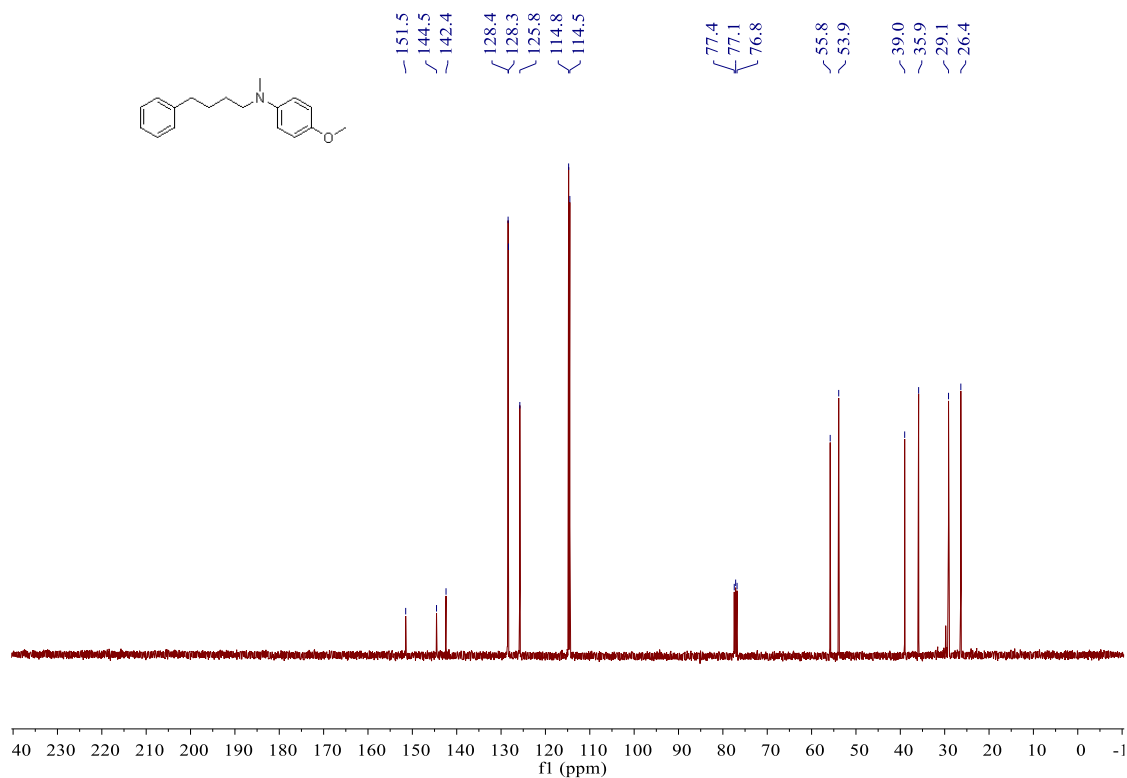

**Fig. S147.**  $^{13}\text{C}$  NMR (101 MHz,  $\text{CDCl}_3$ , 298 K) spectrum of compound **9ae**.

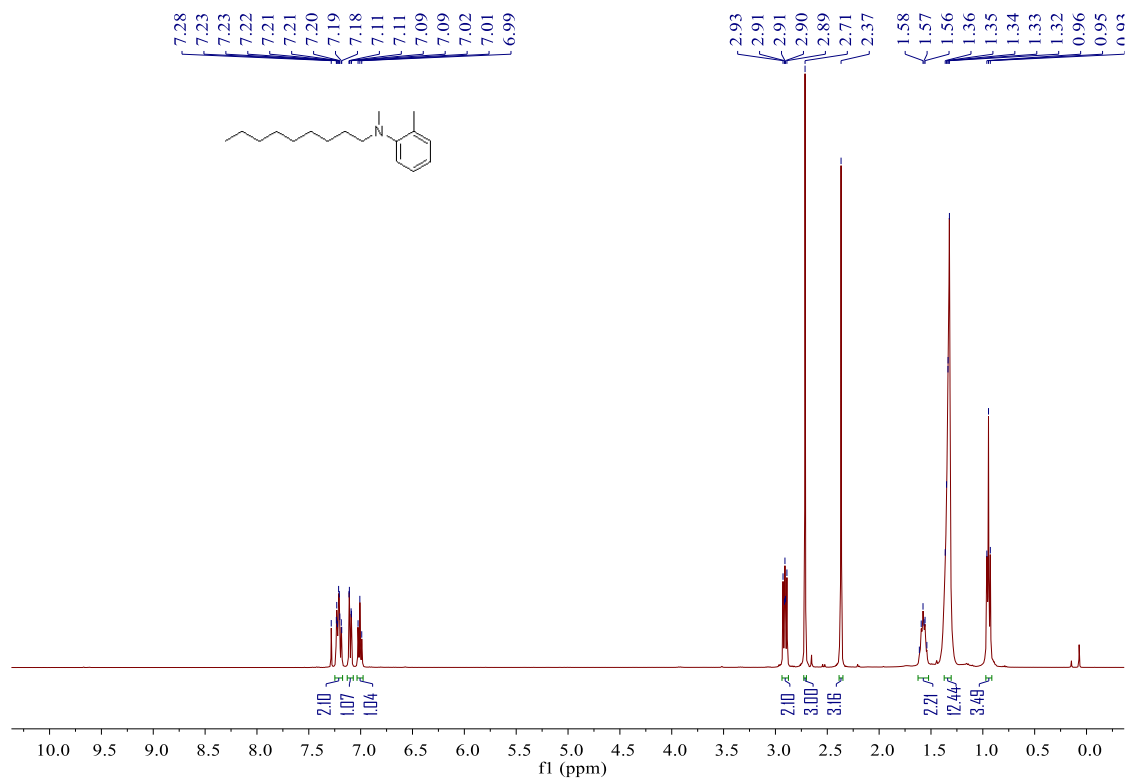

**Fig. S148.**  $^1\text{H}$  NMR (400 MHz,  $\text{CDCl}_3$ , 298 K) spectrum of compound **9mb**.

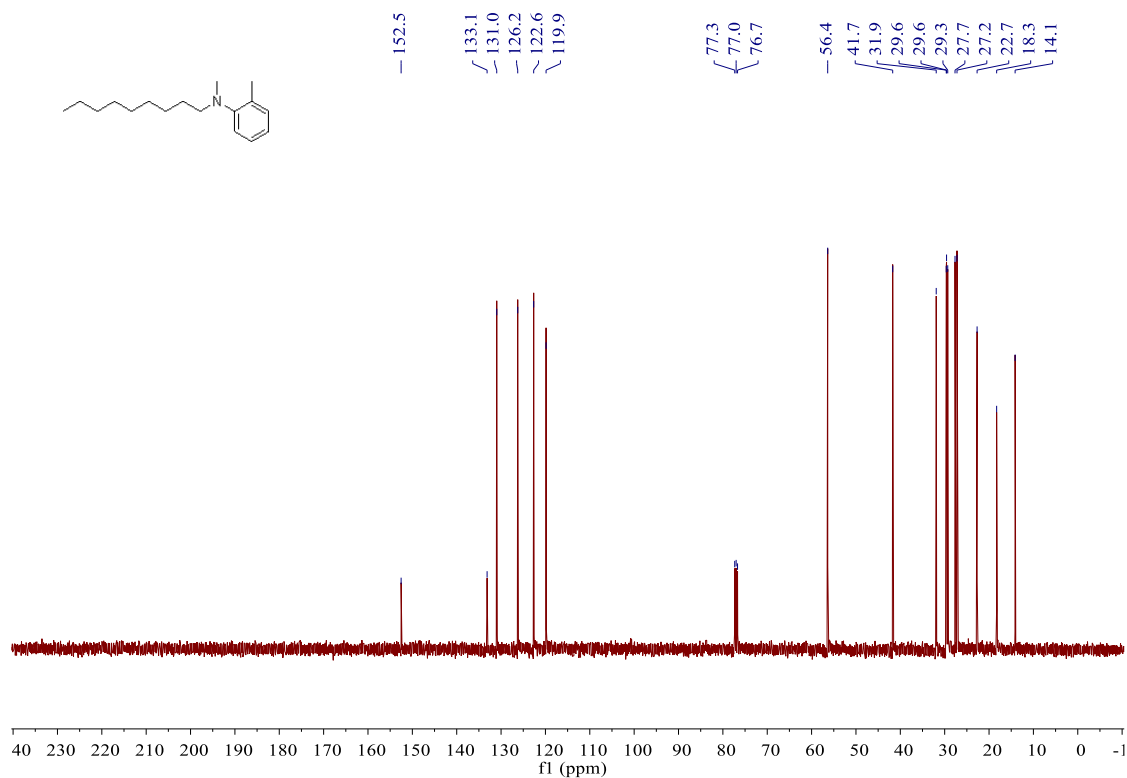

**Fig. S149.**  $^{13}\text{C}$  NMR (101 MHz,  $\text{CDCl}_3$ , 298 K) spectrum of compound **9mb**.

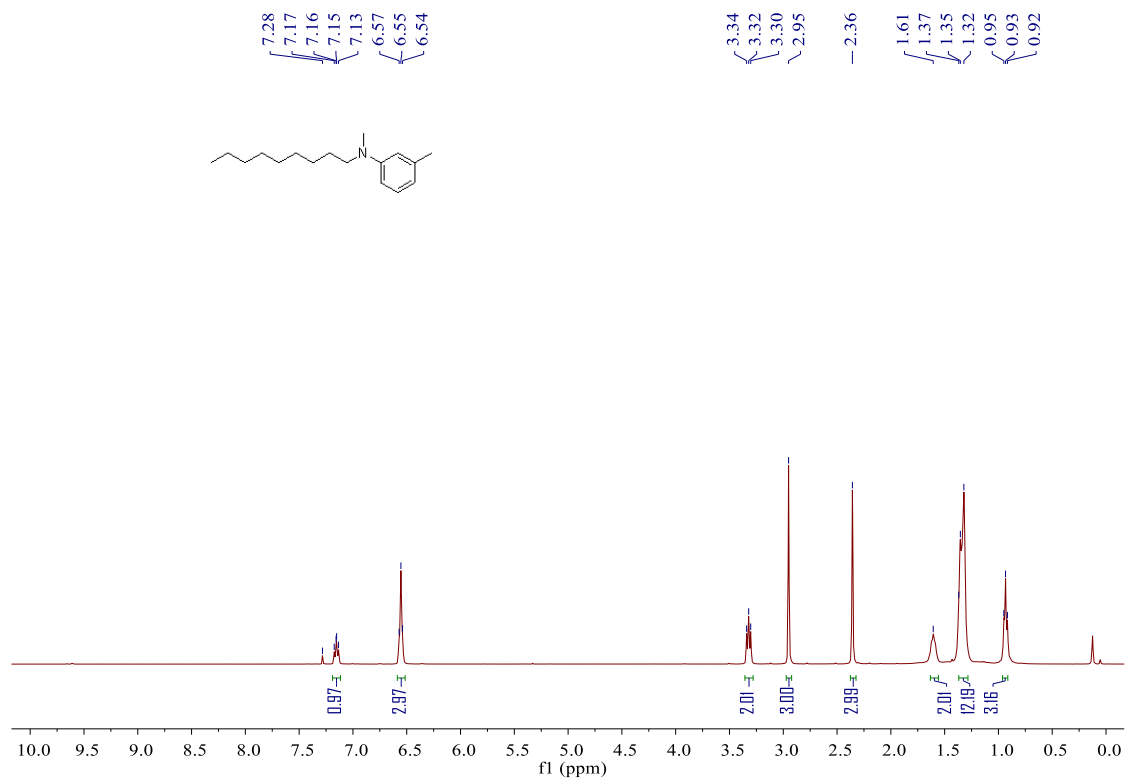

**Fig. S150.**  $^1\text{H}$  NMR (400 MHz,  $\text{CDCl}_3$ , 298 K) spectrum of compound **9mc**.

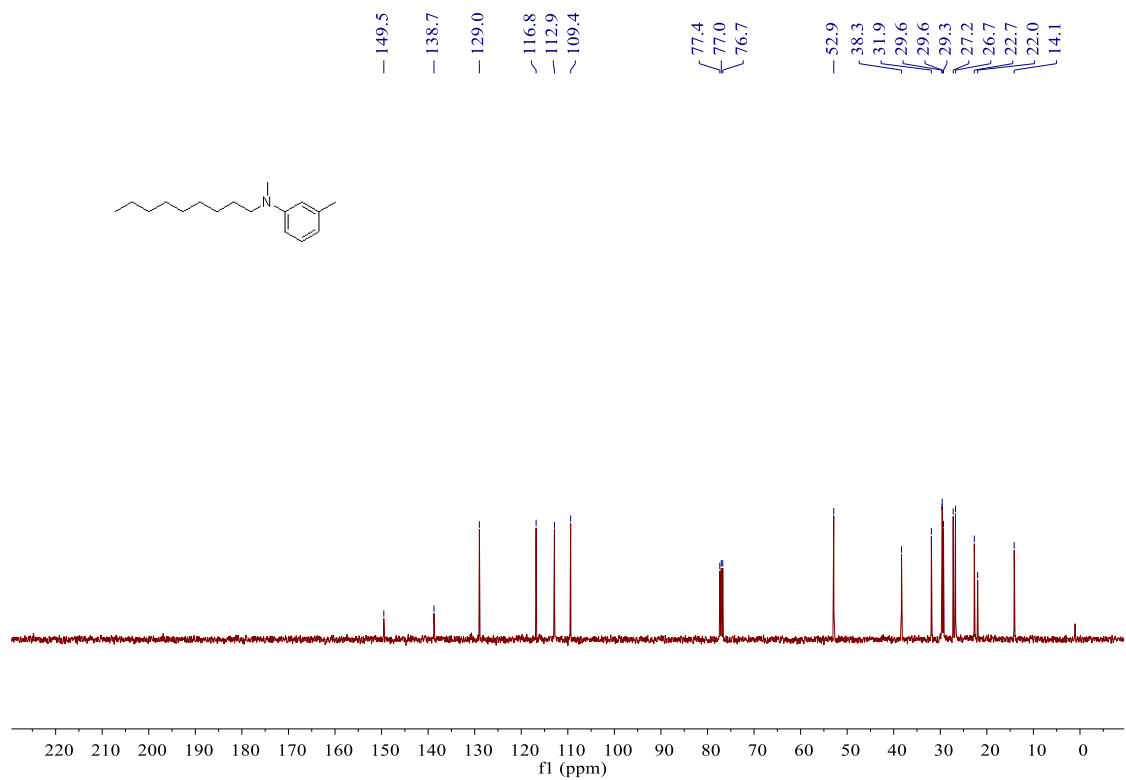

**Fig. S151.**  $^{13}\text{C}$  NMR (101 MHz,  $\text{CDCl}_3$ , 298 K) spectrum of compound **9mc**.

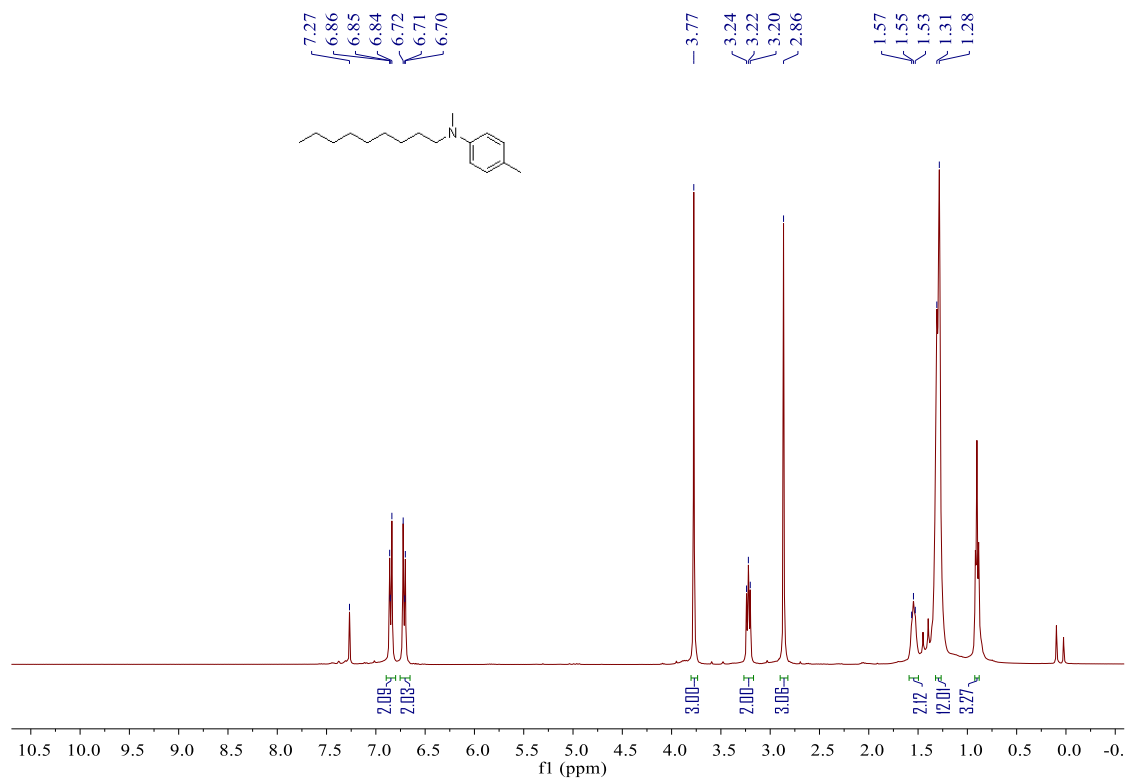

**Fig. S152.**  $^1\text{H}$  NMR (400 MHz,  $\text{CDCl}_3$ , 298 K) spectrum of compound **9md**.

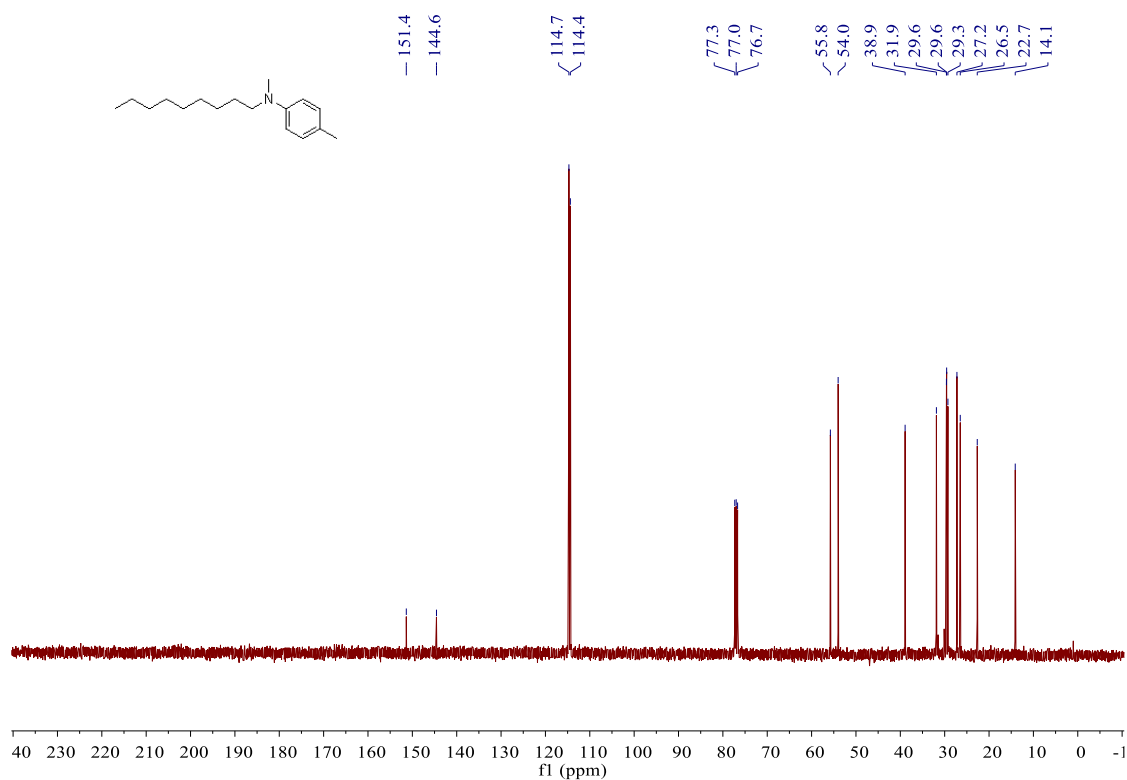

Fig. S153.  $^{13}\text{C}$  NMR (101 MHz,  $\text{CDCl}_3$ , 298 K) spectrum of compound 9md.

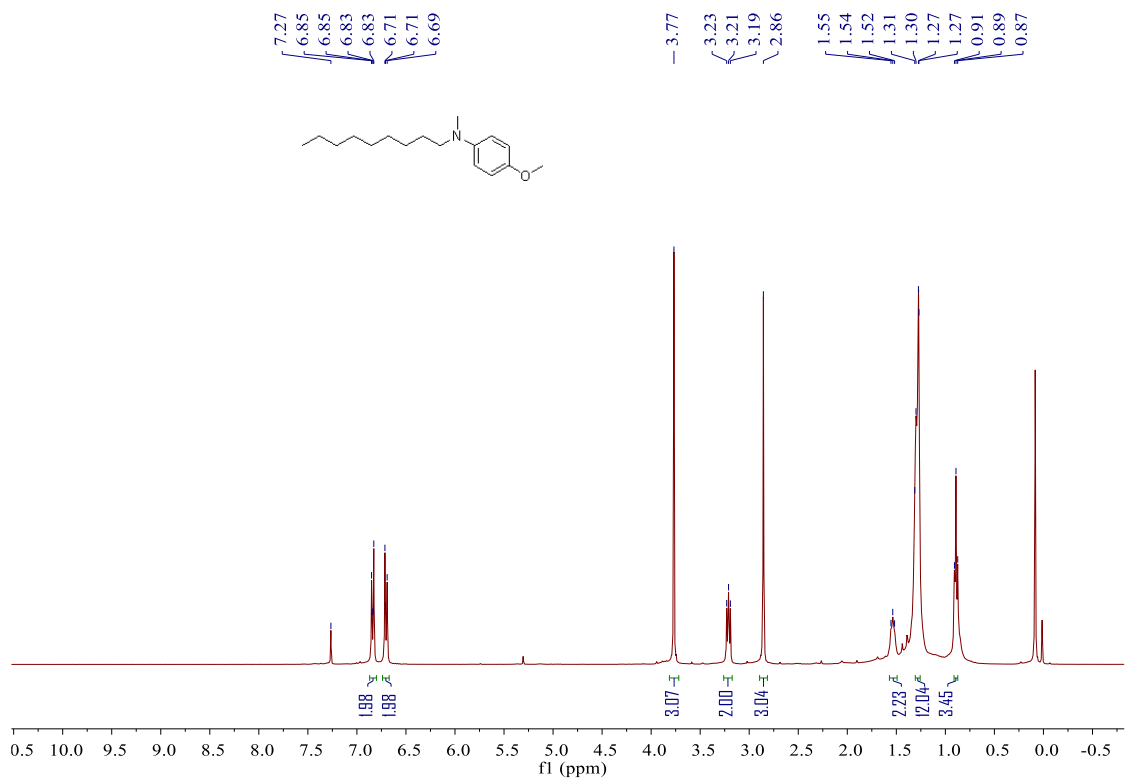

Fig. S154.  $^1\text{H}$  NMR (400 MHz,  $\text{CDCl}_3$ , 298 K) spectrum of compound 9me.

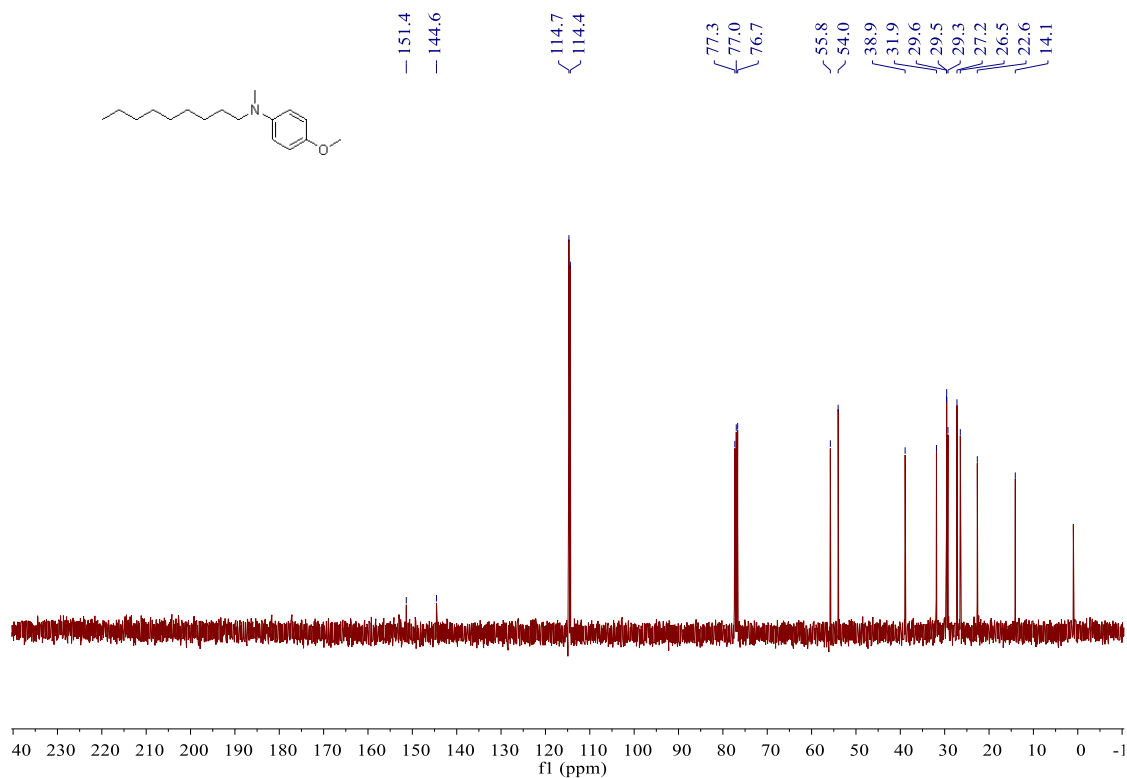

**Fig. S155.**  $^{13}\text{C}$  NMR (101 MHz,  $\text{CDCl}_3$ , 298 K) spectrum of compound **9me**.

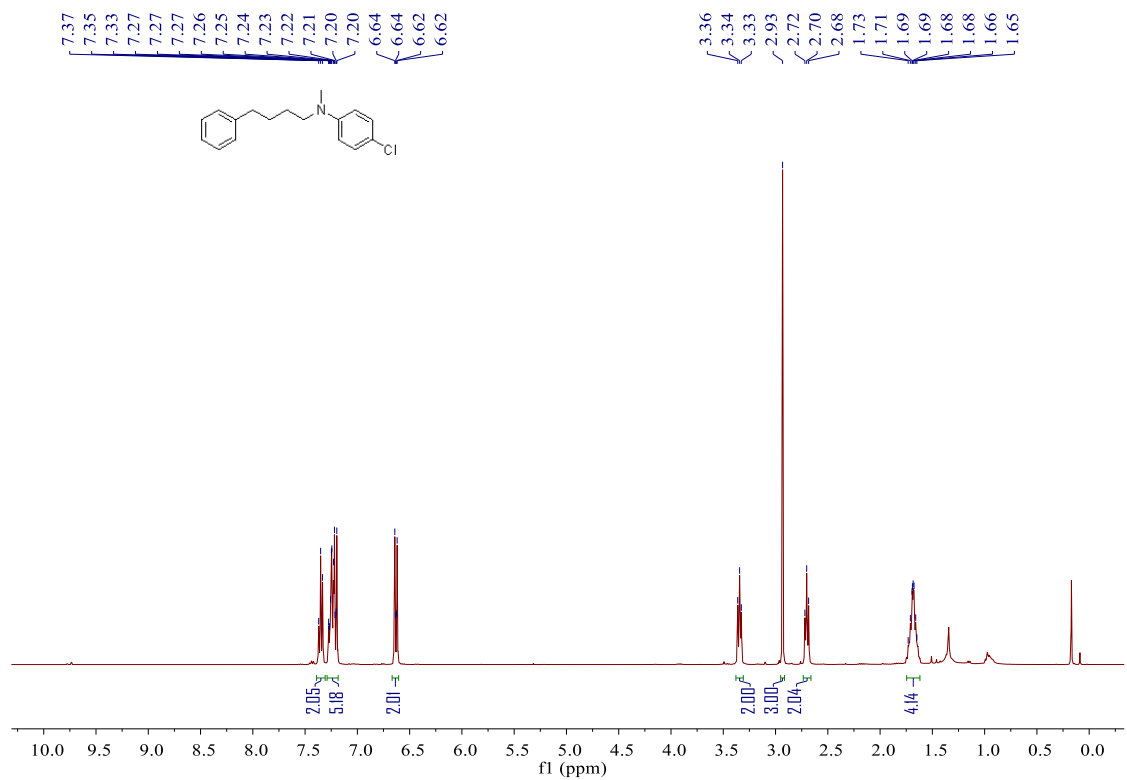

**Fig. S156.**  $^1\text{H}$  NMR (400 MHz,  $\text{CDCl}_3$ , 298 K) spectrum of compound **9af**.

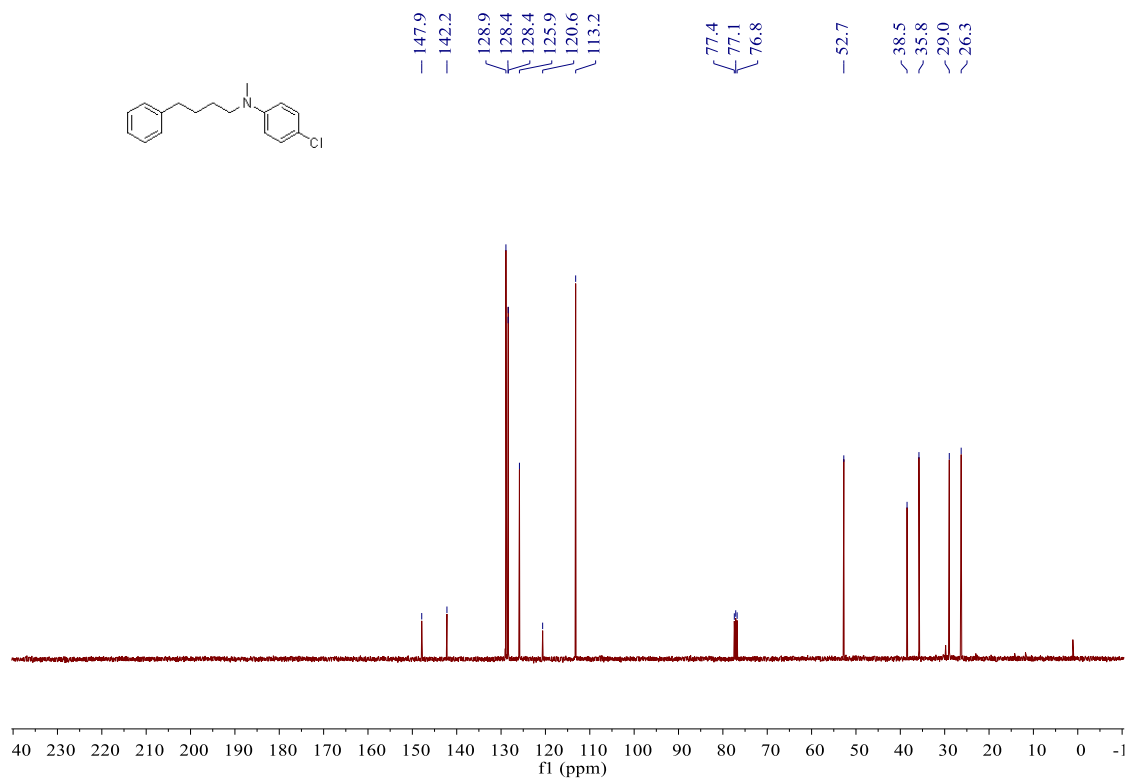

**Fig. S157.**  $^{13}\text{C}$  NMR (101 MHz,  $\text{CDCl}_3$ , 298 K) spectrum of compound **9af**.

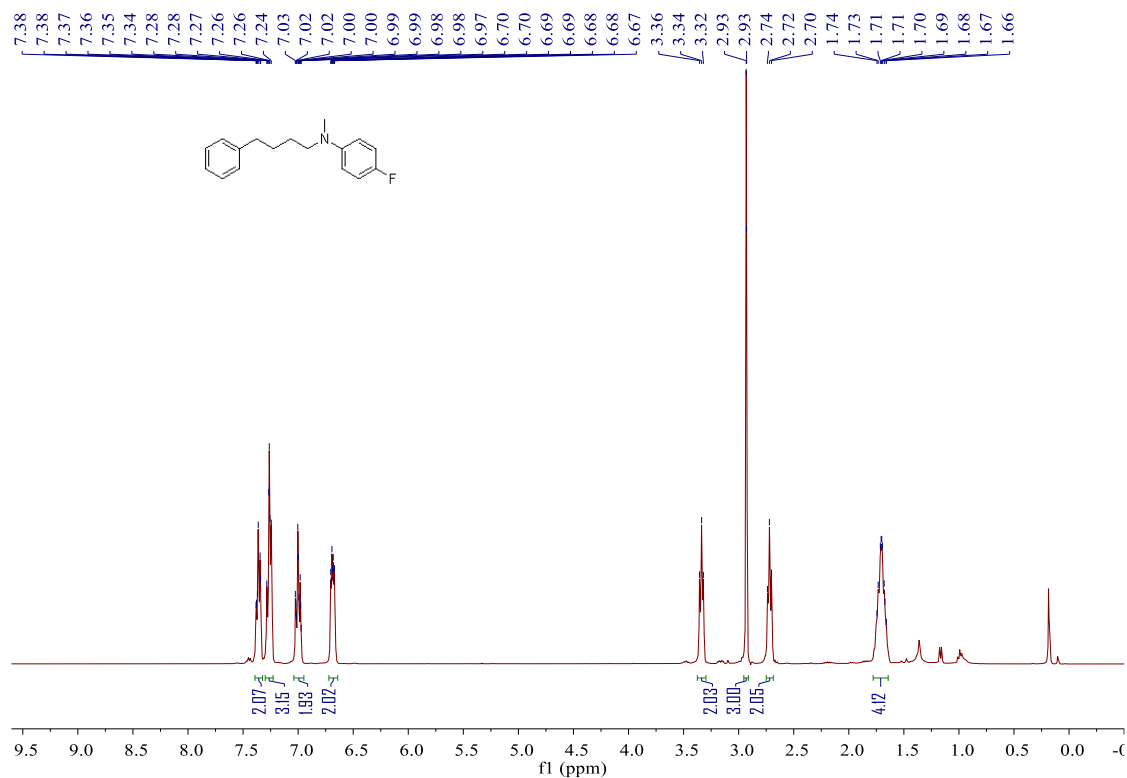

**Fig. S158.**  $^1\text{H}$  NMR (400 MHz,  $\text{CDCl}_3$ , 298 K) spectrum of compound **9ag**.

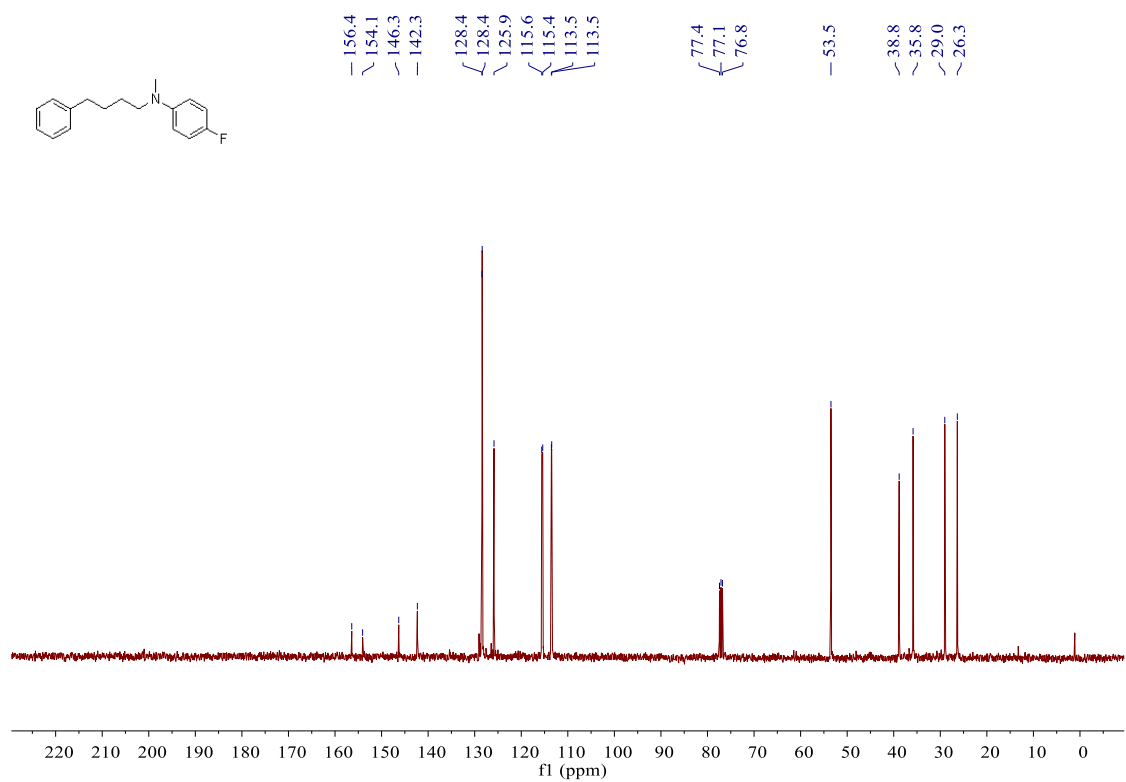

**Fig. S159.** <sup>13</sup>C NMR (101 MHz, CDCl<sub>3</sub>, 298 K) spectrum of compound **9ag**.

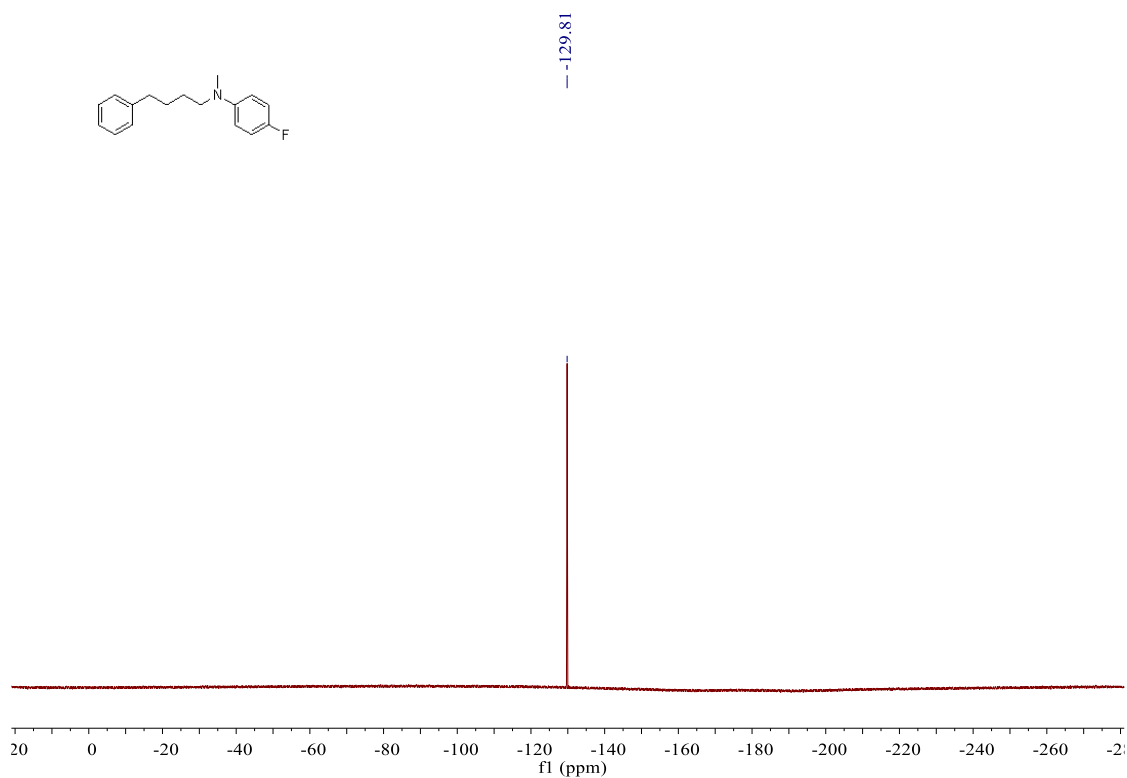

**Fig. S160.** <sup>19</sup>F NMR (376 MHz, CDCl<sub>3</sub>, 298 K) spectrum of compound **9ag**.

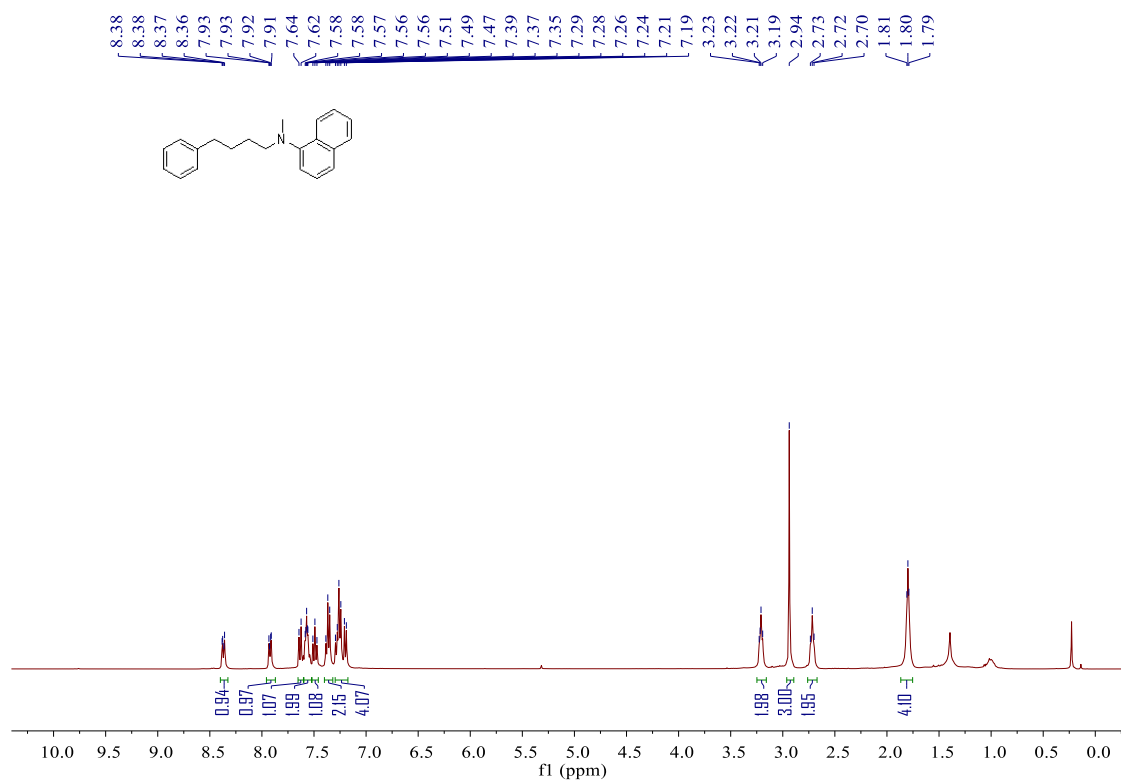

**Fig. S161.** <sup>1</sup>H NMR (400 MHz, CDCl<sub>3</sub>, 298 K) spectrum of compound **9ah**.

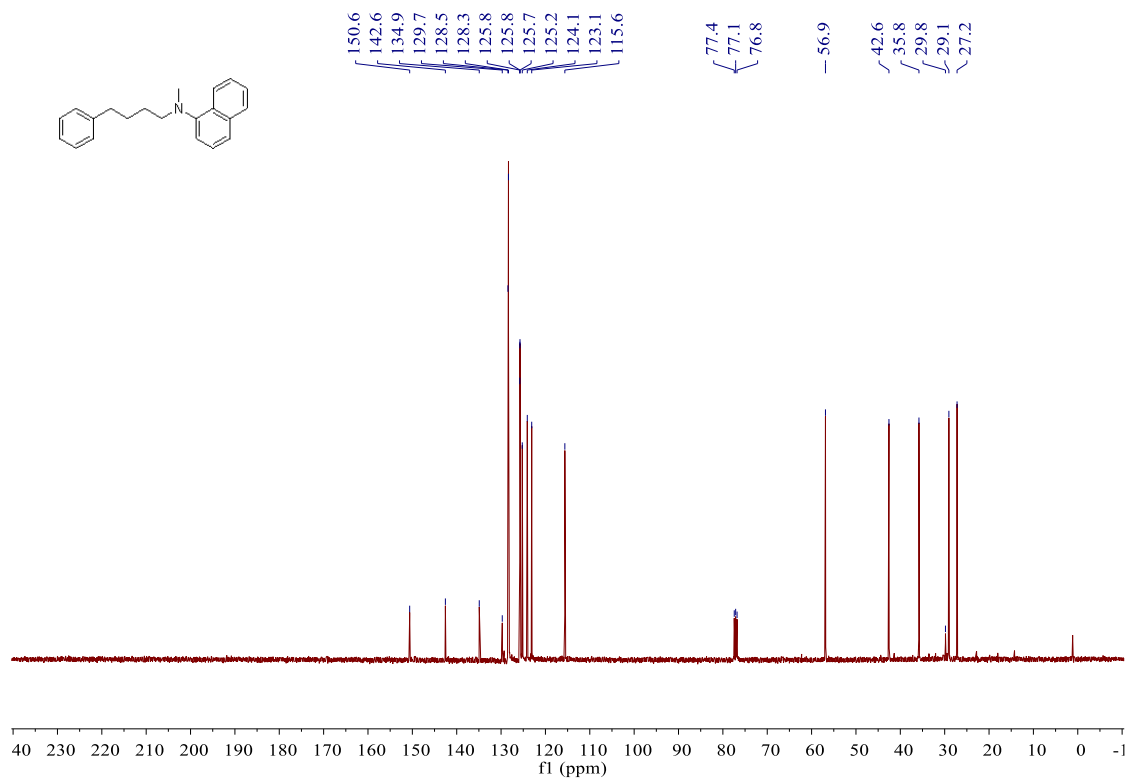

**Fig. S162.** <sup>13</sup>C NMR (101 MHz, CDCl<sub>3</sub>, 298 K) spectrum of compound **9ah**.



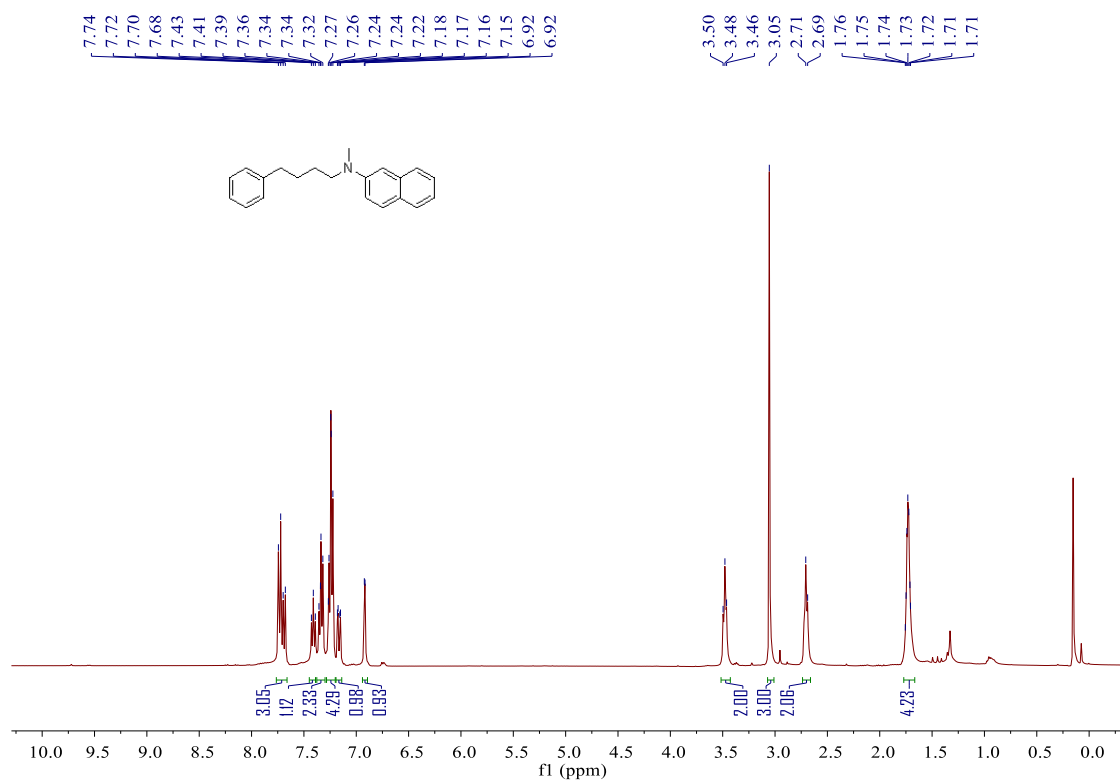

**Fig. S163.** <sup>1</sup>H NMR (400 MHz, CDCl<sub>3</sub>, 298 K) spectrum of compound **9ai**.

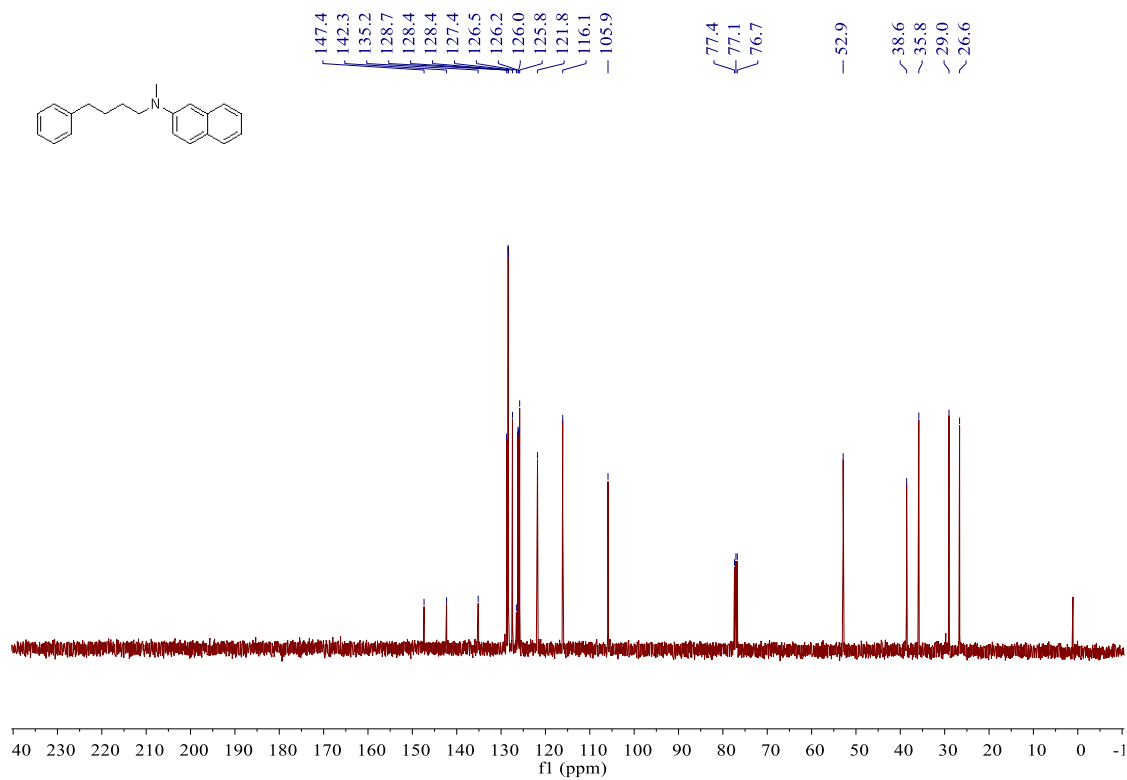

**Fig. S164.** <sup>13</sup>C NMR (101 MHz, CDCl<sub>3</sub>, 298 K) spectrum of compound **9ai**.

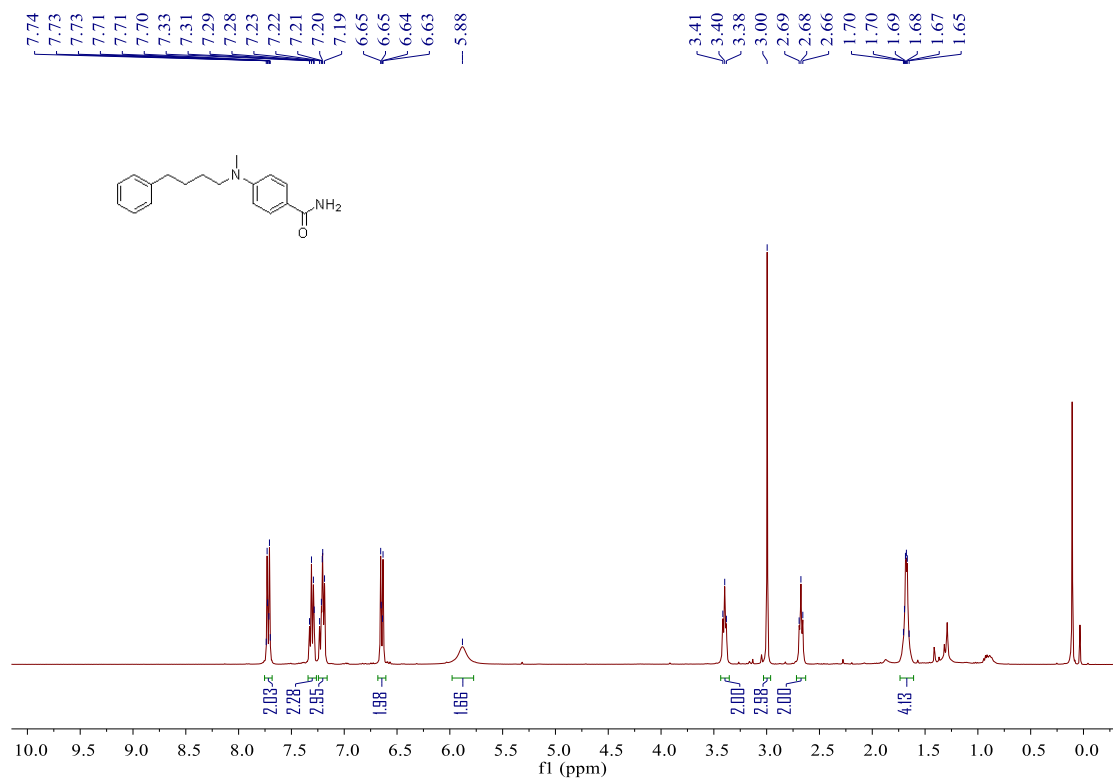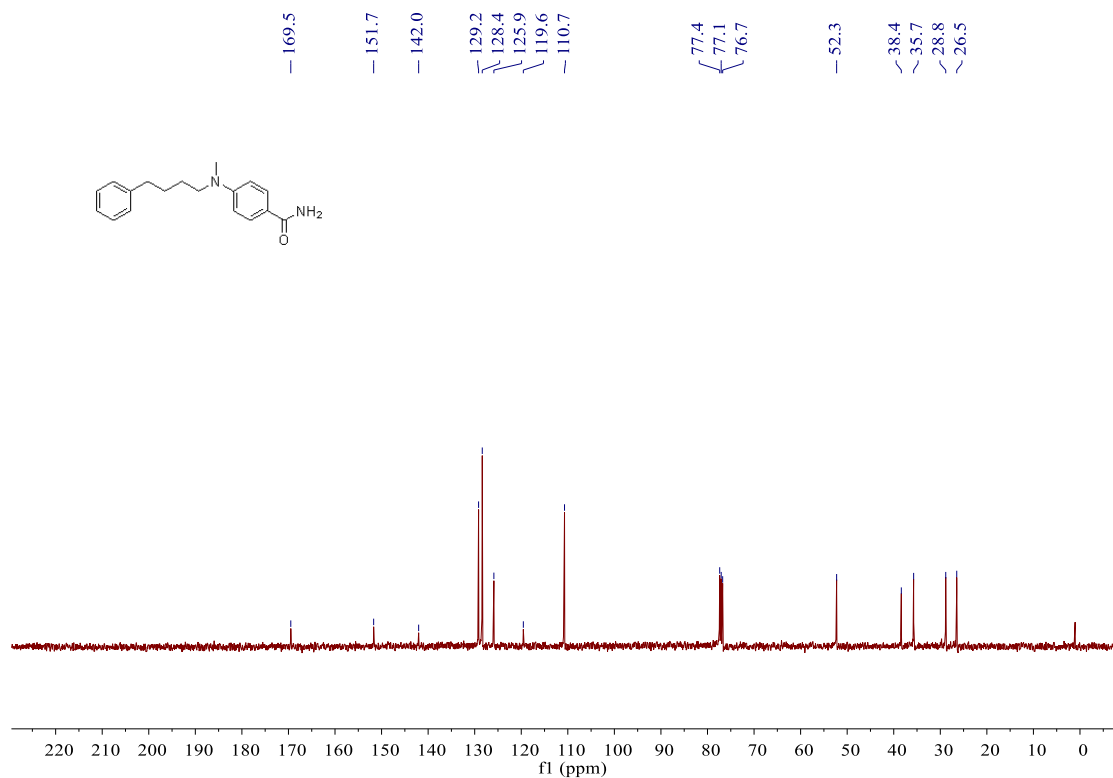

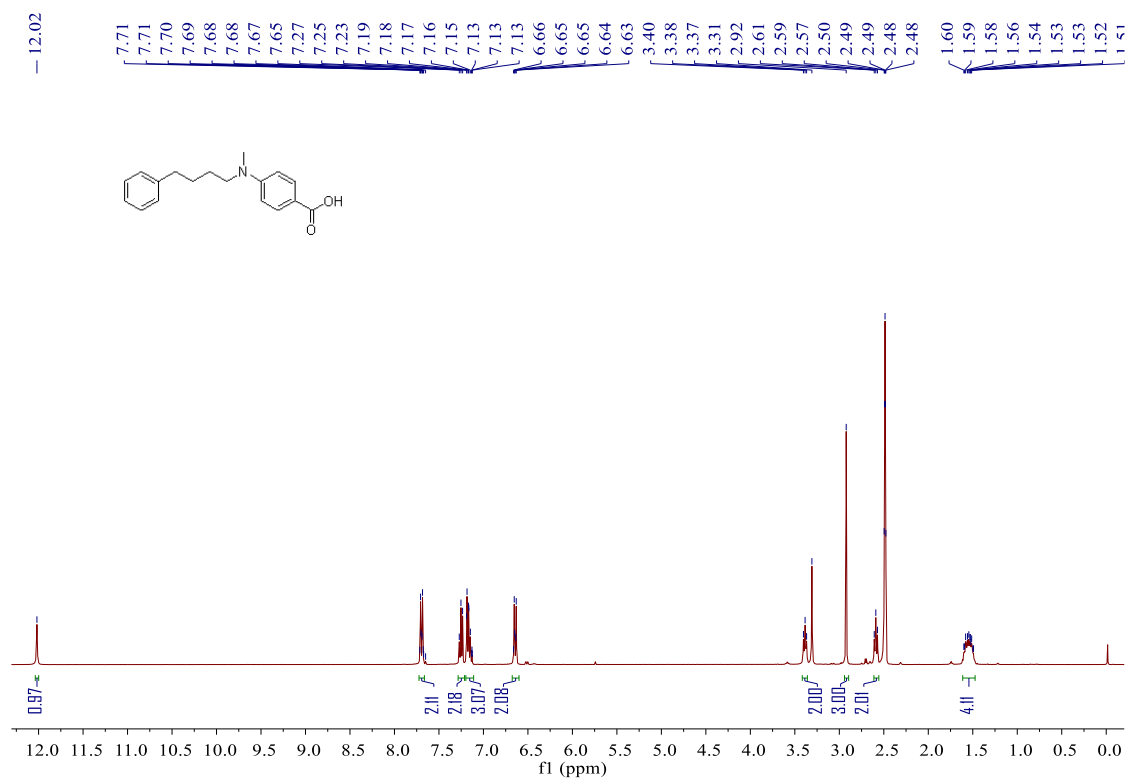

**Fig. S167.** <sup>1</sup>H NMR (400 MHz, DMSO-*d*<sub>6</sub>, 298 K) spectrum of compound **9ak**.

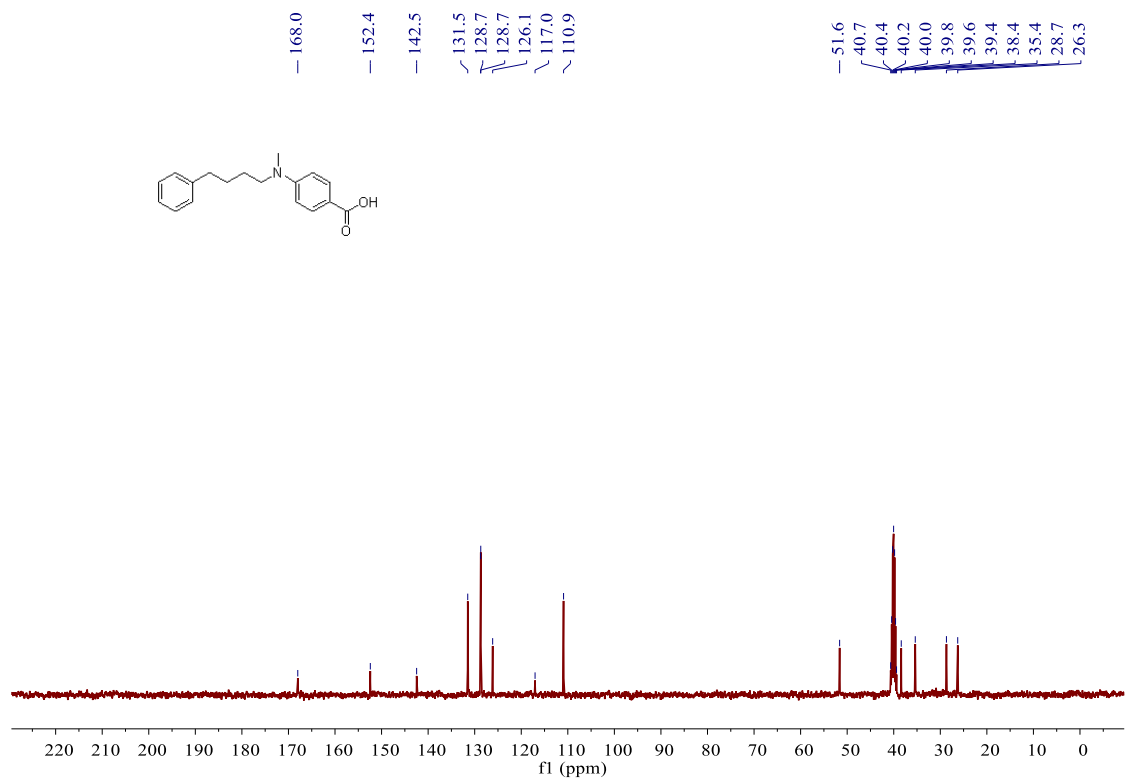

**Fig. S168.** <sup>13</sup>C NMR (101 MHz, DMSO-*d*<sub>6</sub>, 298 K) spectrum of compound **9ak**.

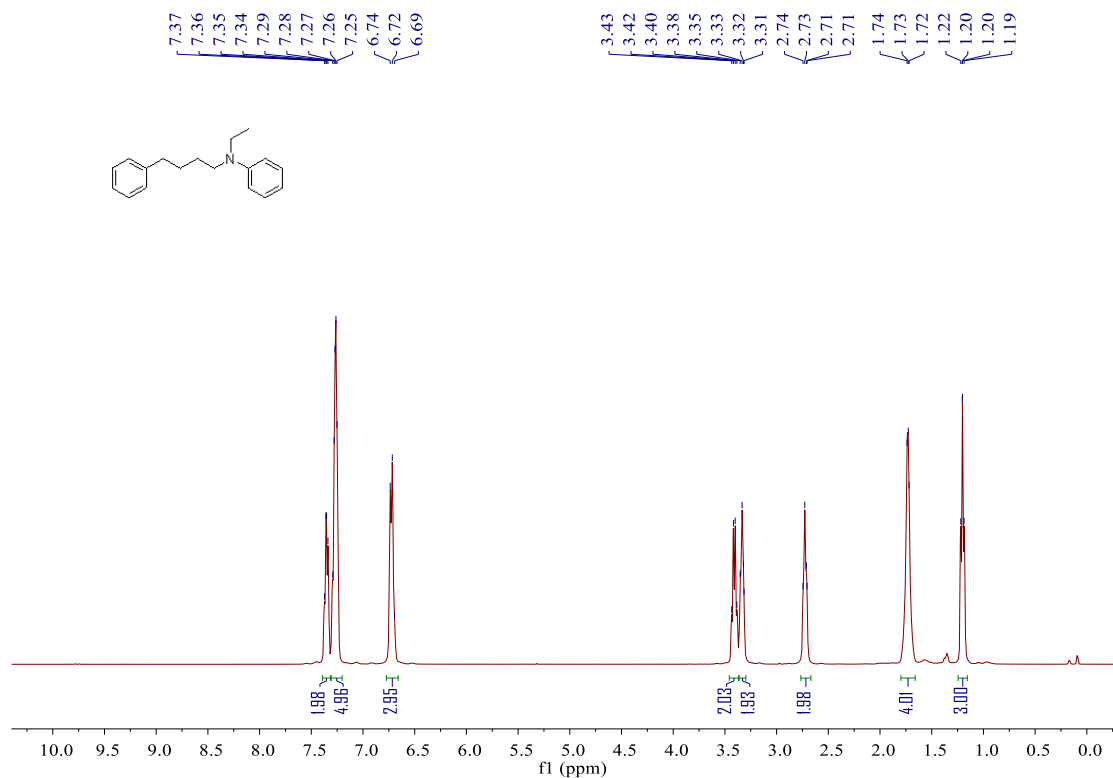

**Fig. S169.** <sup>1</sup>H NMR (400 MHz, CDCl<sub>3</sub>, 298 K) spectrum of compound **9al**.

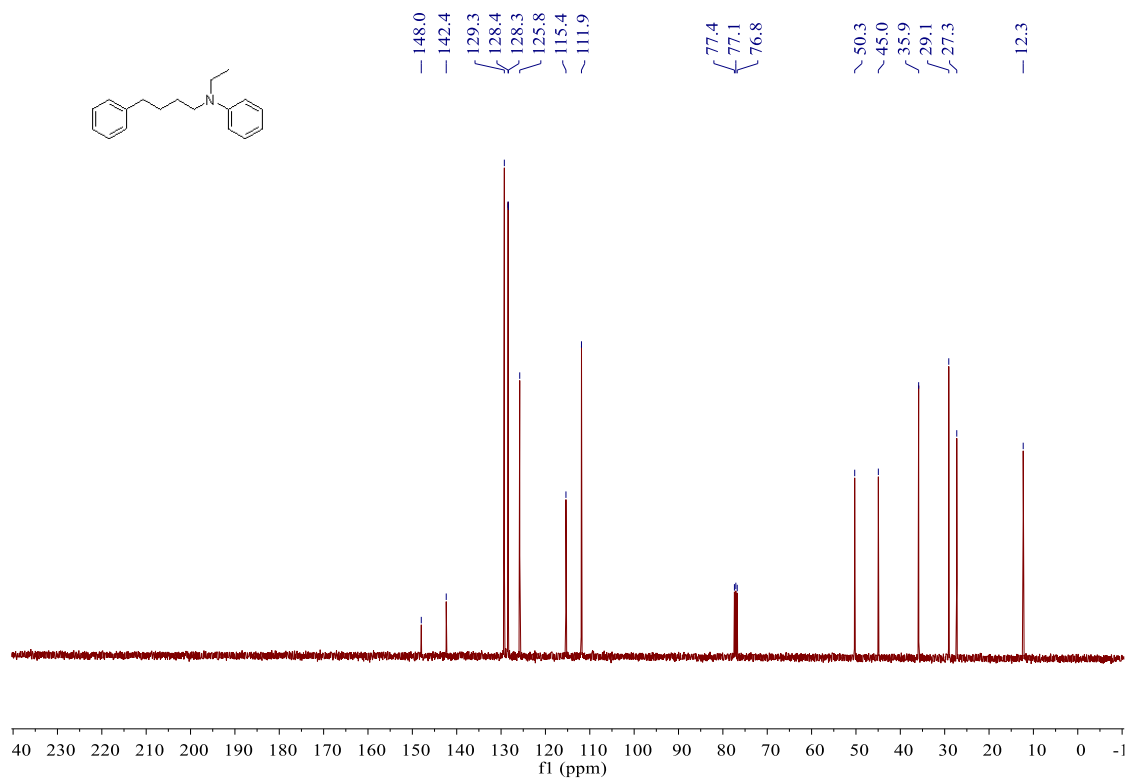

**Fig. S170.** <sup>13</sup>C NMR (101 MHz, CDCl<sub>3</sub>, 298 K) spectrum of compound **9al**.

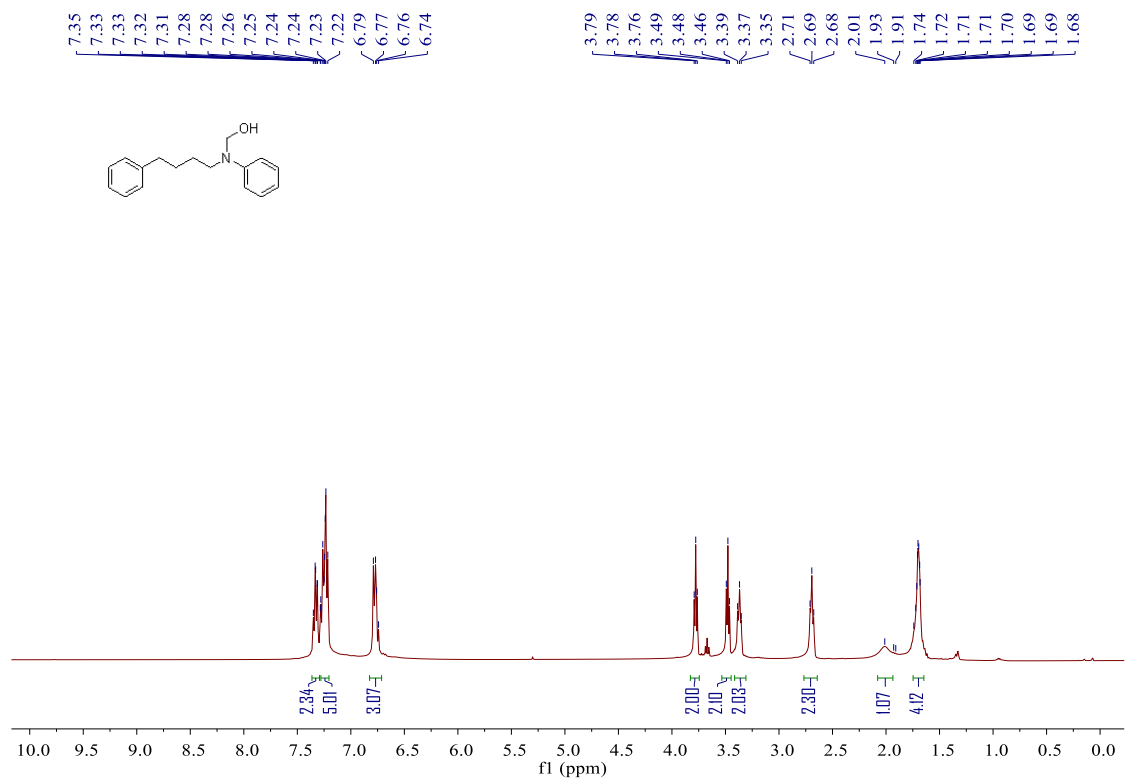

**Fig. S171.** <sup>1</sup>H NMR (400 MHz, CDCl<sub>3</sub>, 298 K) spectrum of compound **9am**.

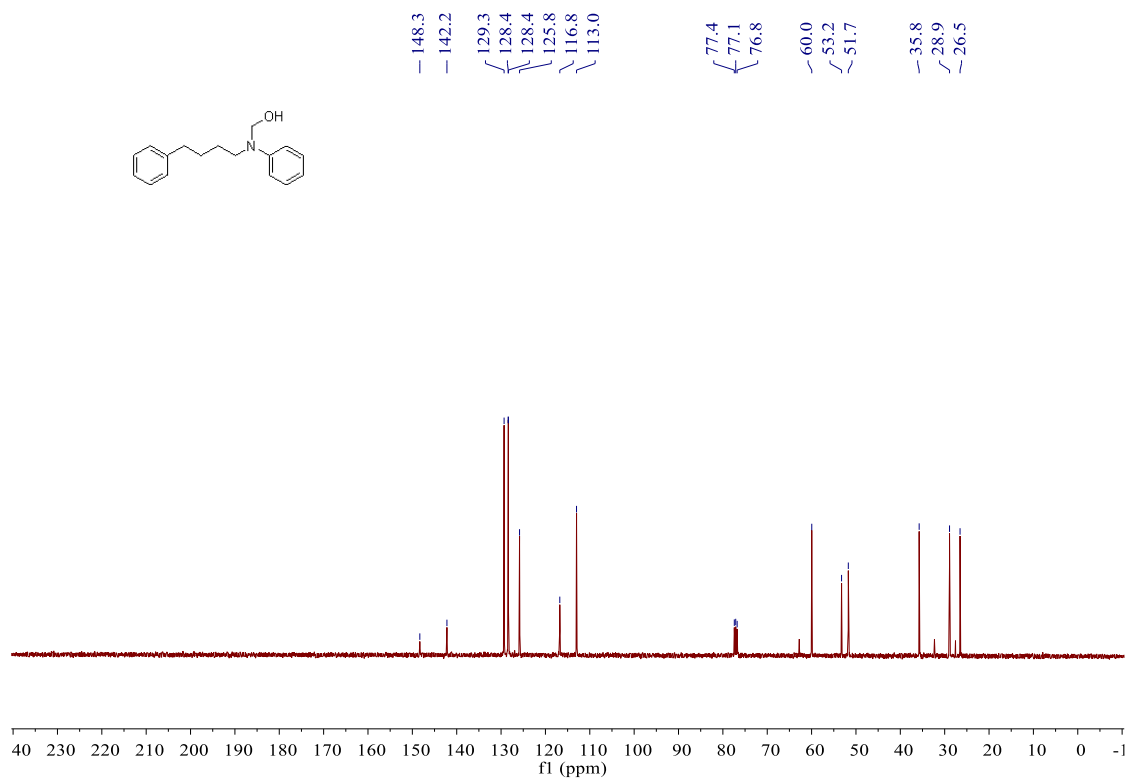

**Fig. S172.** <sup>13</sup>C NMR (101 MHz, CDCl<sub>3</sub>, 298 K) spectrum of compound **9am**.

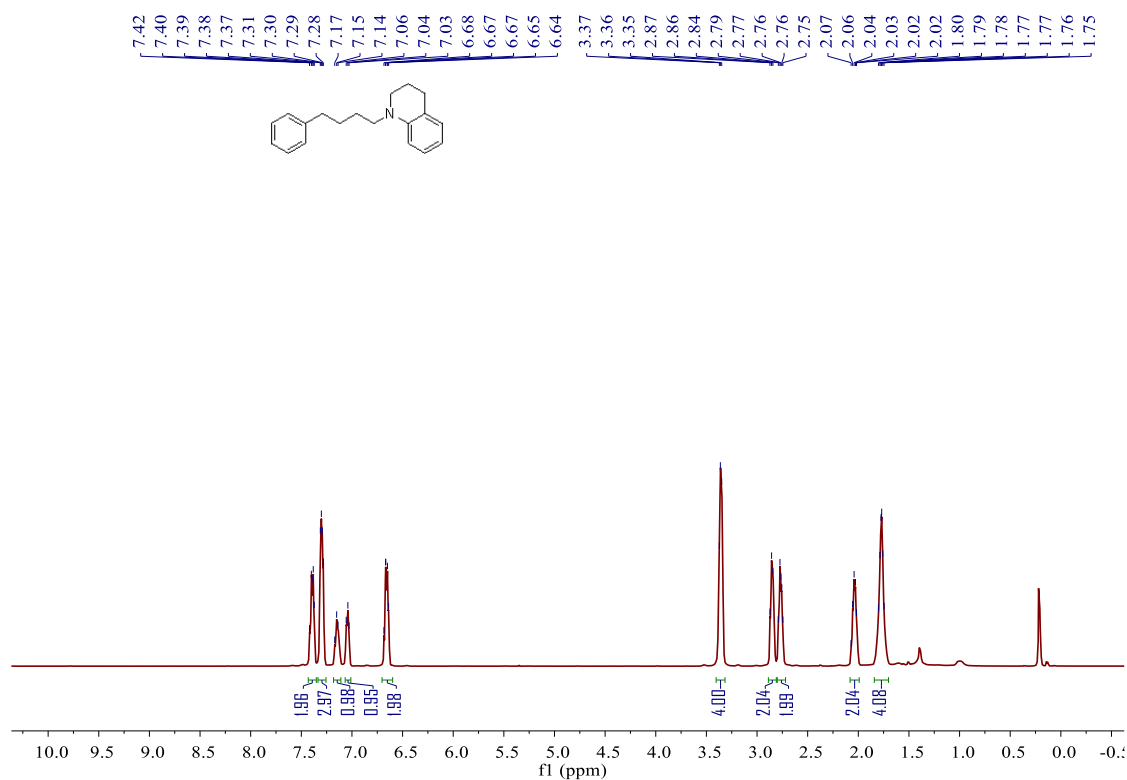

**Fig. S173.** <sup>1</sup>H NMR (400 MHz, CDCl<sub>3</sub>, 298 K) spectrum of compound **9an**.

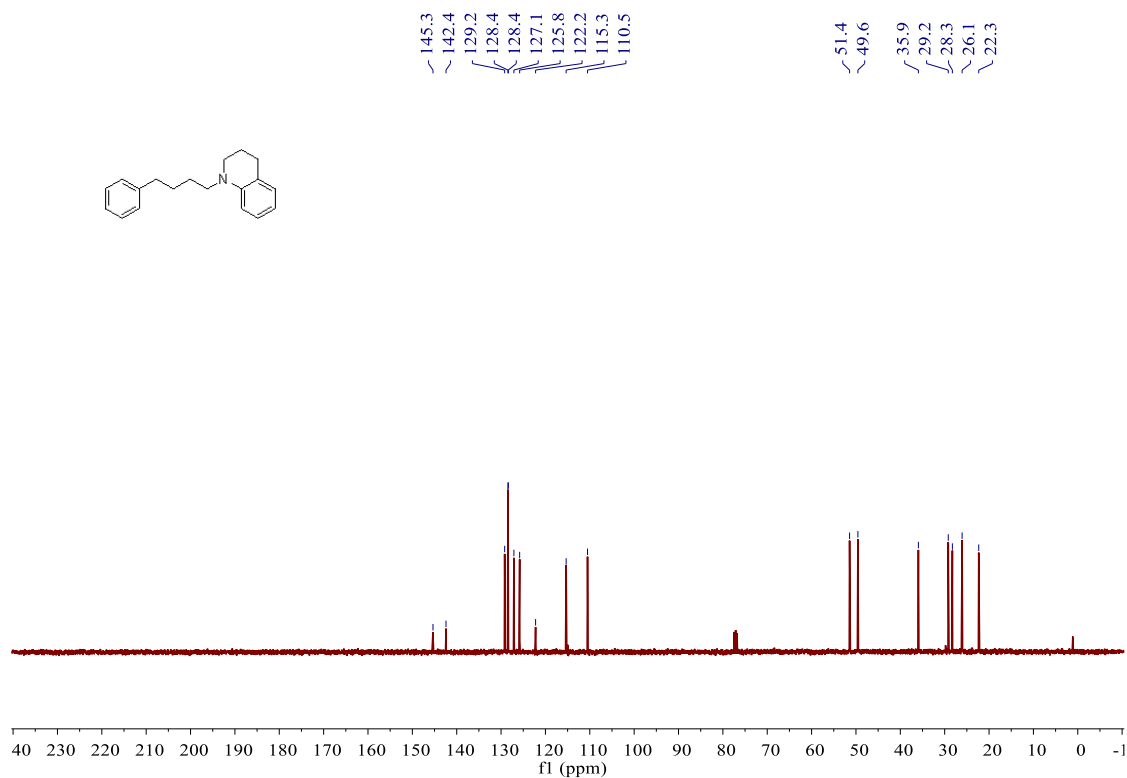

**Fig. S174.** <sup>13</sup>C NMR (101 MHz, CDCl<sub>3</sub>, 298 K) spectrum of compound **9an**.

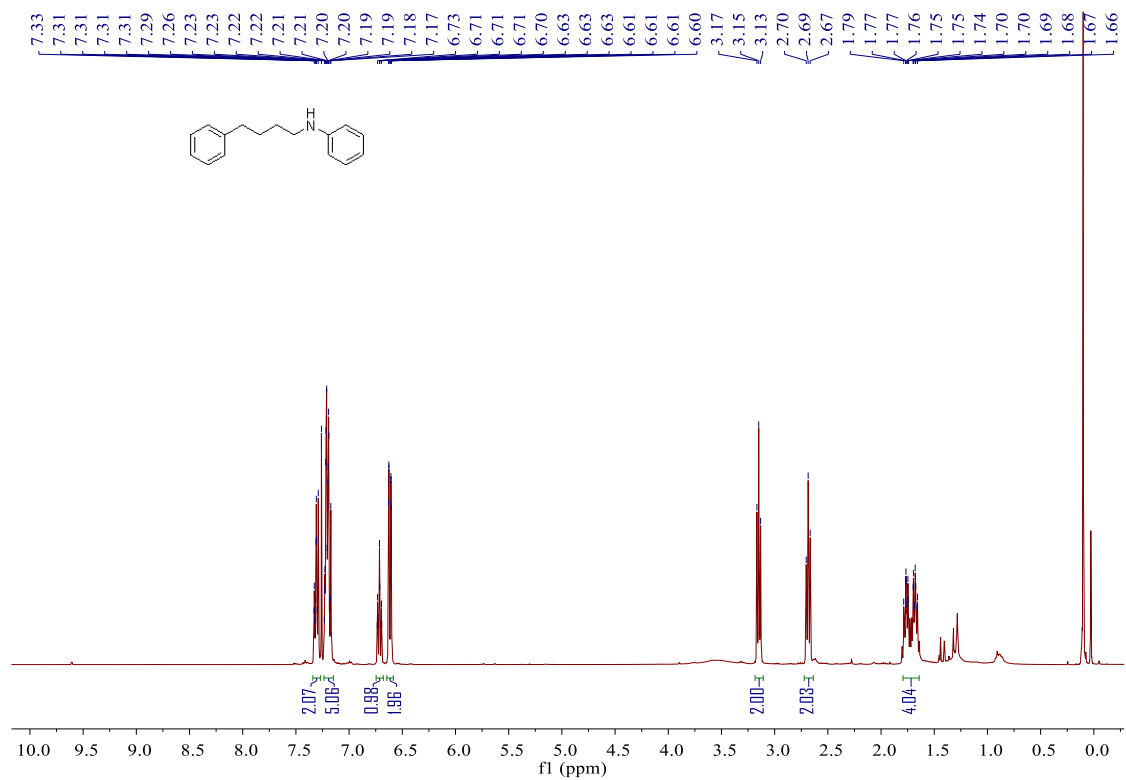

**Fig. S175.** <sup>1</sup>H NMR (400 MHz, CDCl<sub>3</sub>, 298 K) spectrum of compound **9ao**.

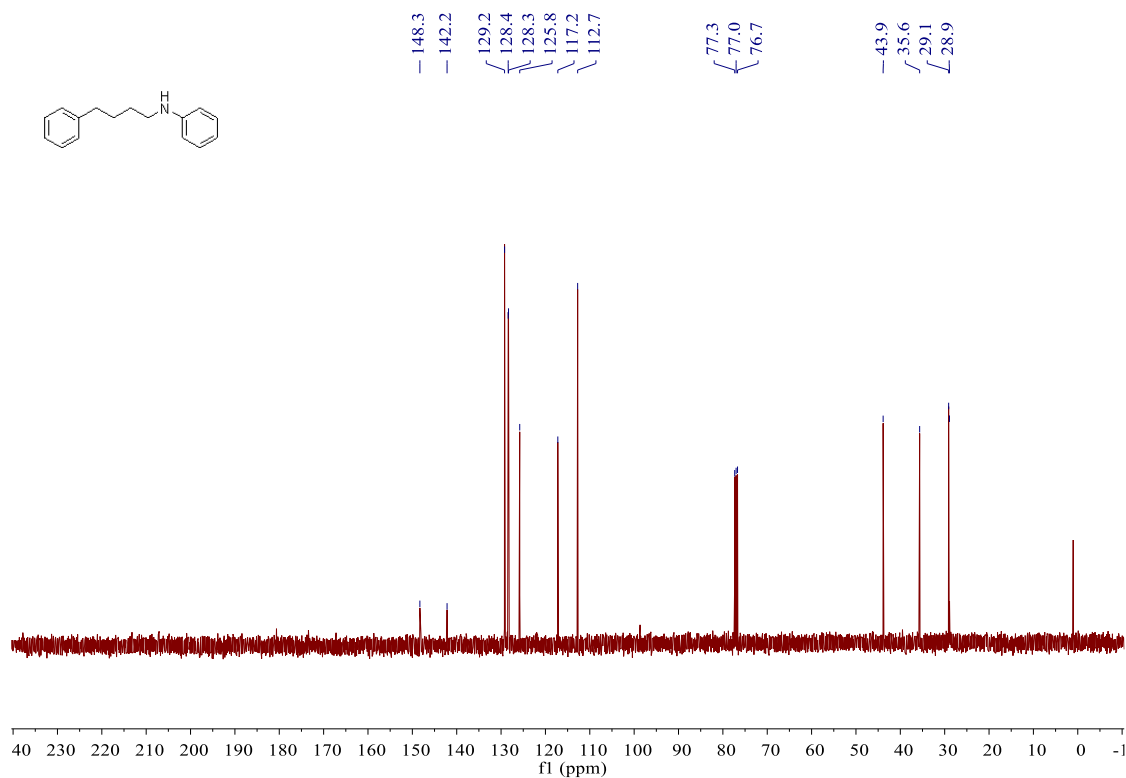

**Fig. S176.** <sup>13</sup>C NMR (101 MHz, CDCl<sub>3</sub>, 298 K) spectrum of compound **9ao**.

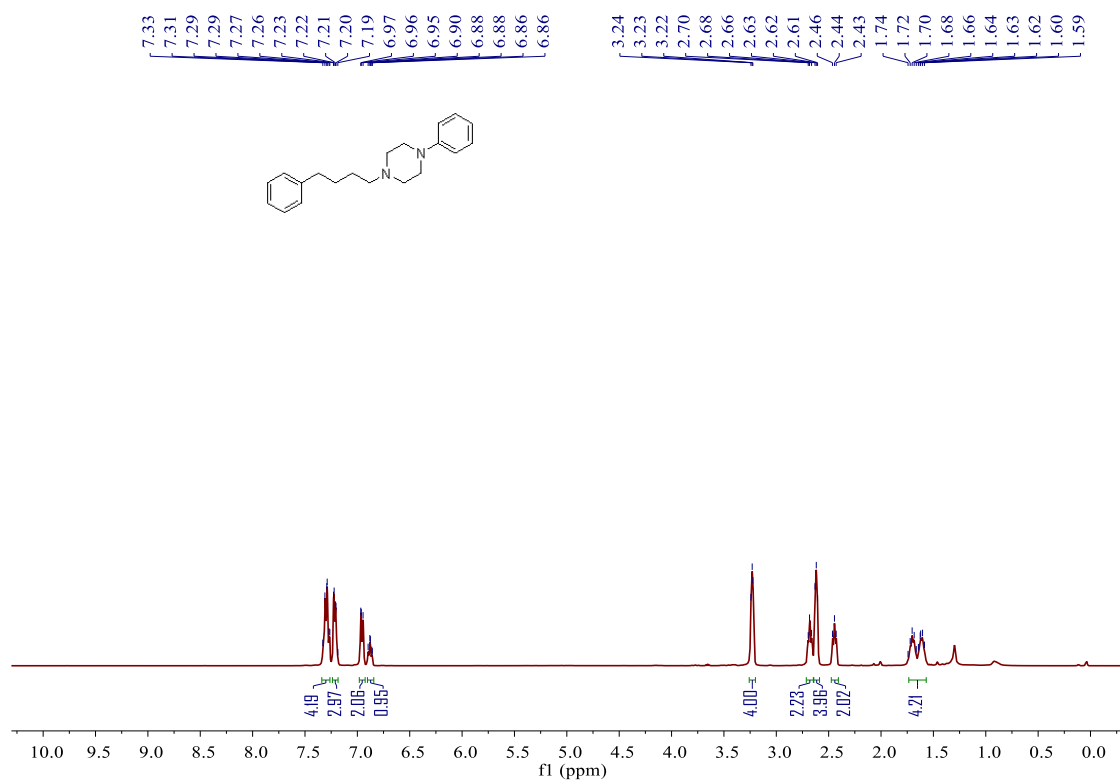

**Fig. S177.** <sup>1</sup>H NMR (400 MHz, CDCl<sub>3</sub>, 298 K) spectrum of compound **9ap**.

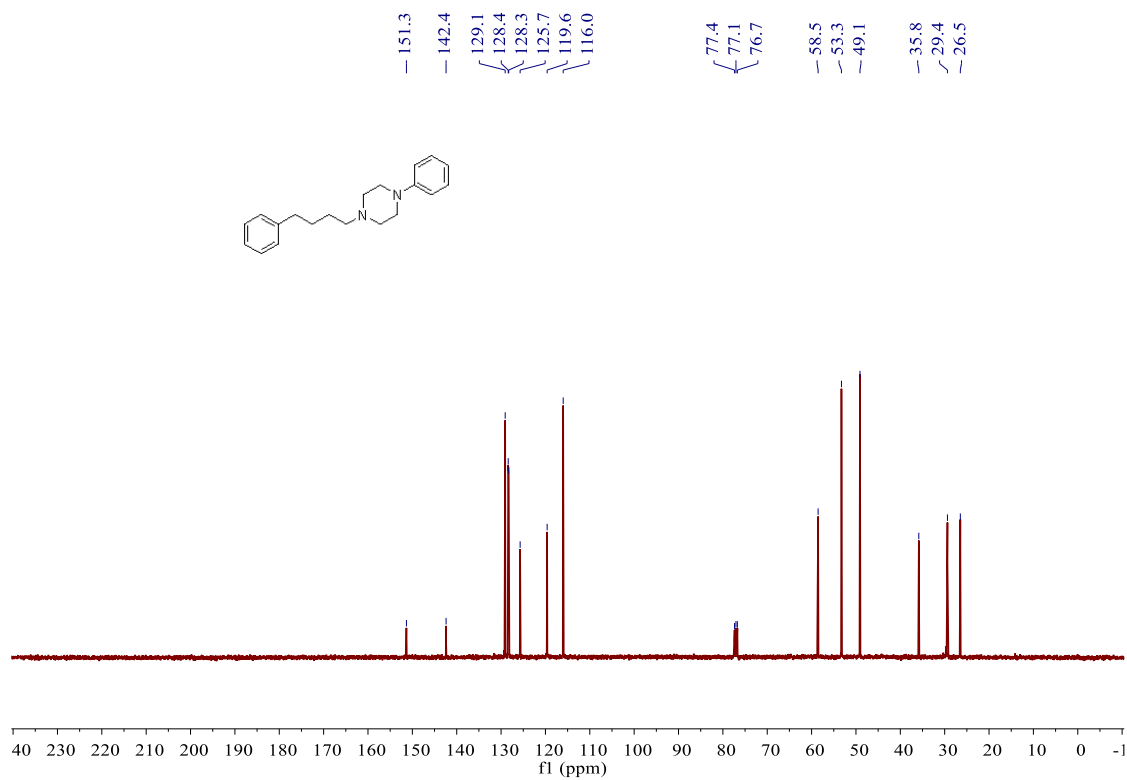

**Fig. S178.** <sup>13</sup>C NMR (101 MHz, CDCl<sub>3</sub>, 298 K) spectrum of compound **9ap**.



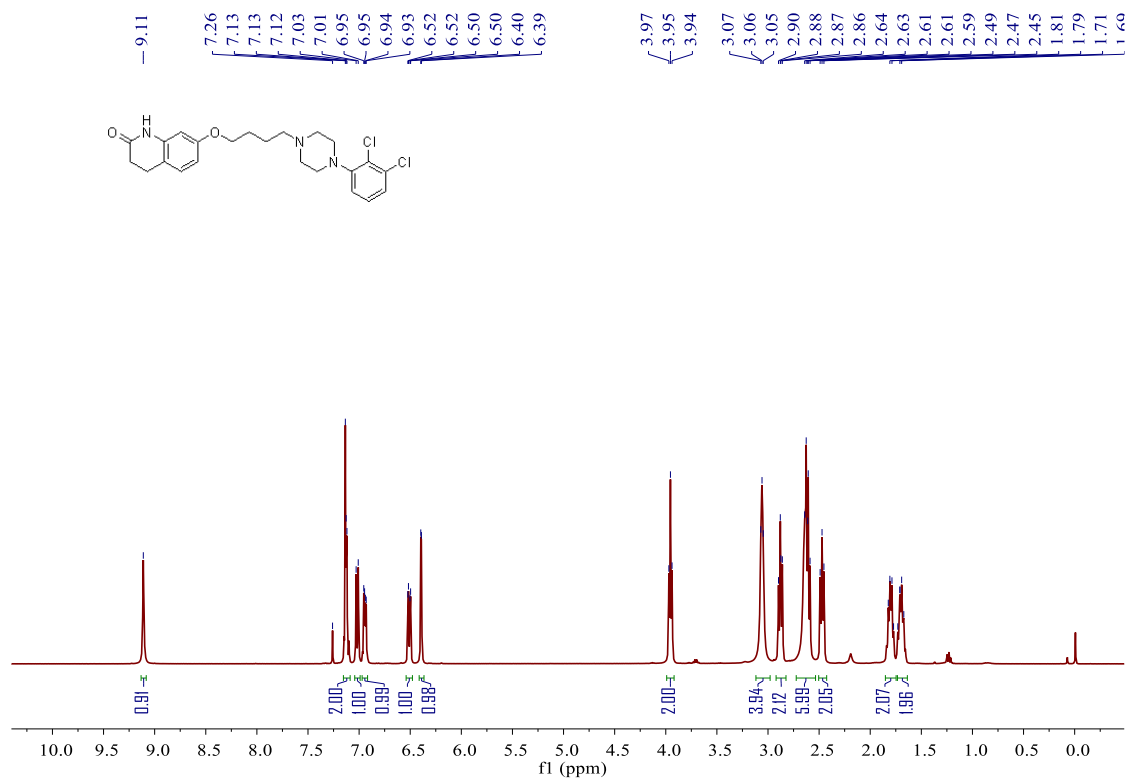

Fig. S179. <sup>1</sup>H NMR (400 MHz, CDCl<sub>3</sub>, 298 K) spectrum of compound 13a.

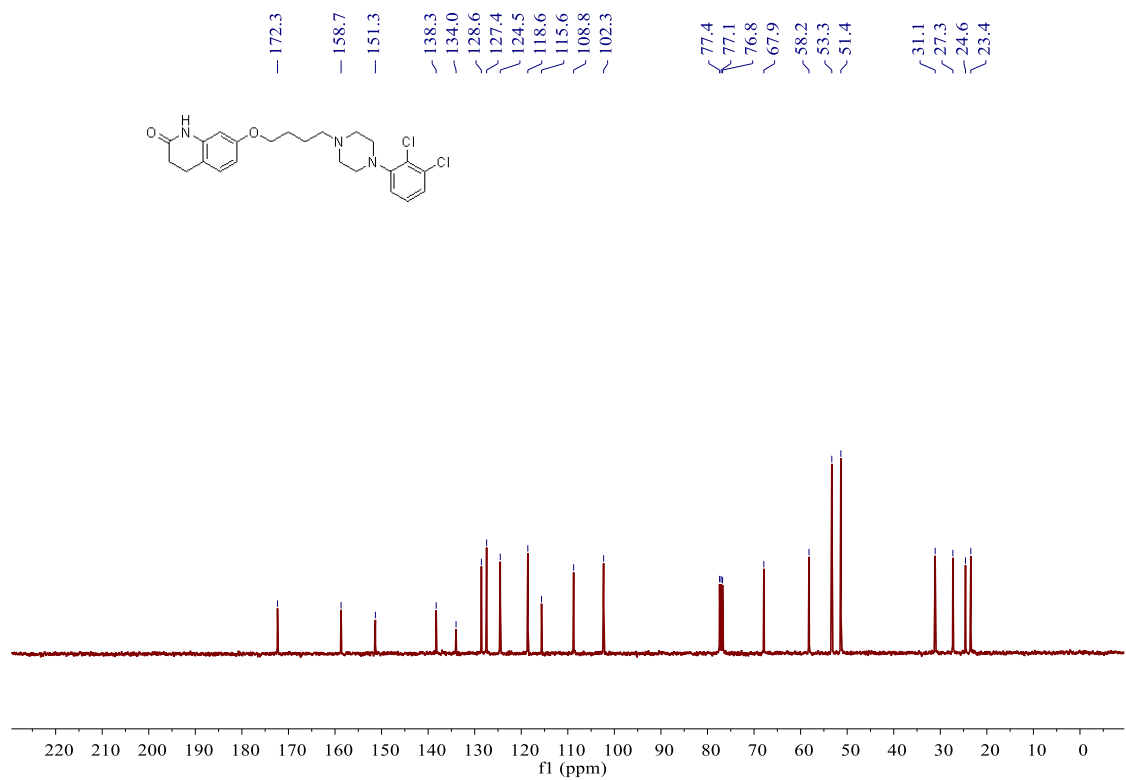

Fig. S180. <sup>13</sup>C NMR (101 MHz, CDCl<sub>3</sub>, 298 K) spectrum of compound 13a.

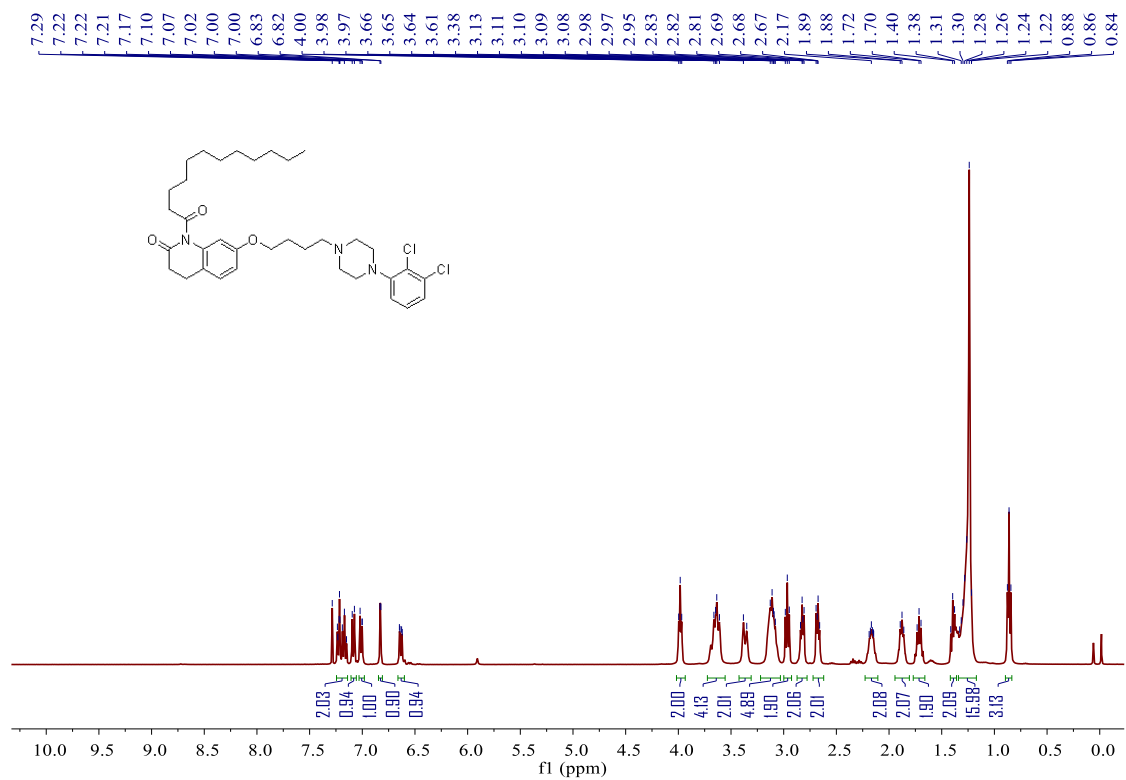

Fig. S181. <sup>1</sup>H NMR (400 MHz, CDCl<sub>3</sub>, 298 K) spectrum of compound 13b.

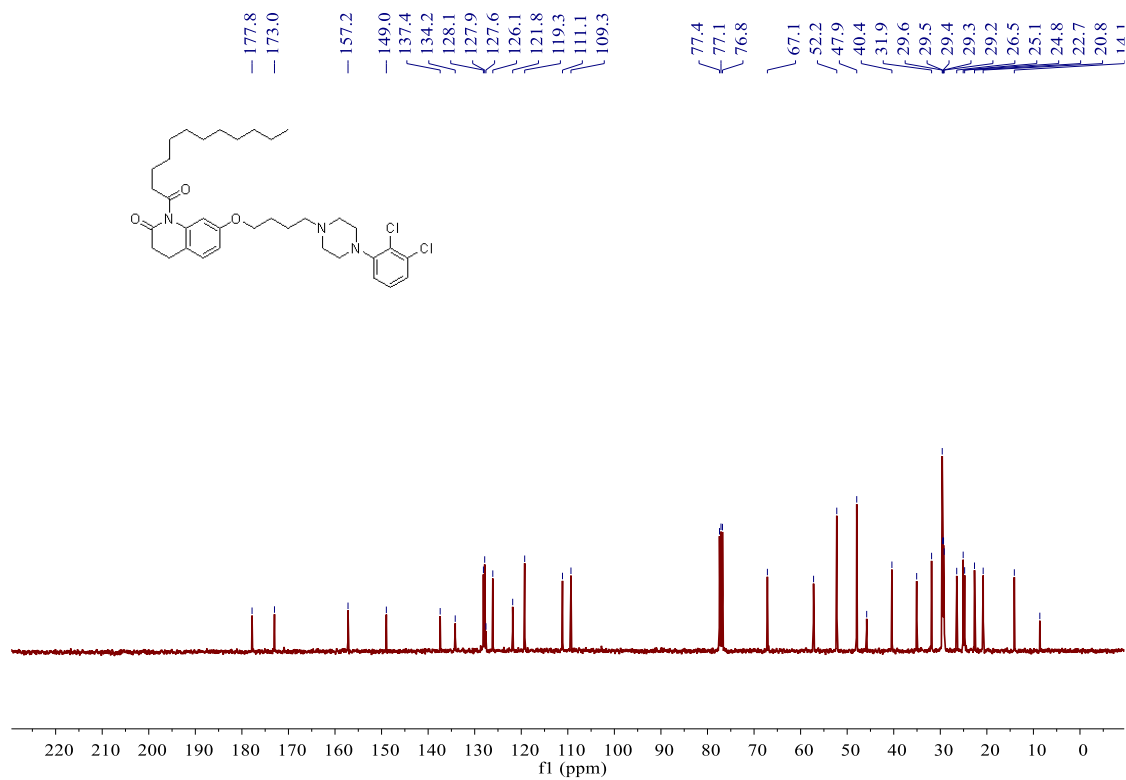

Fig. S182. <sup>13</sup>C NMR (101 MHz, CDCl<sub>3</sub>, 298 K) spectrum of compound 13b.

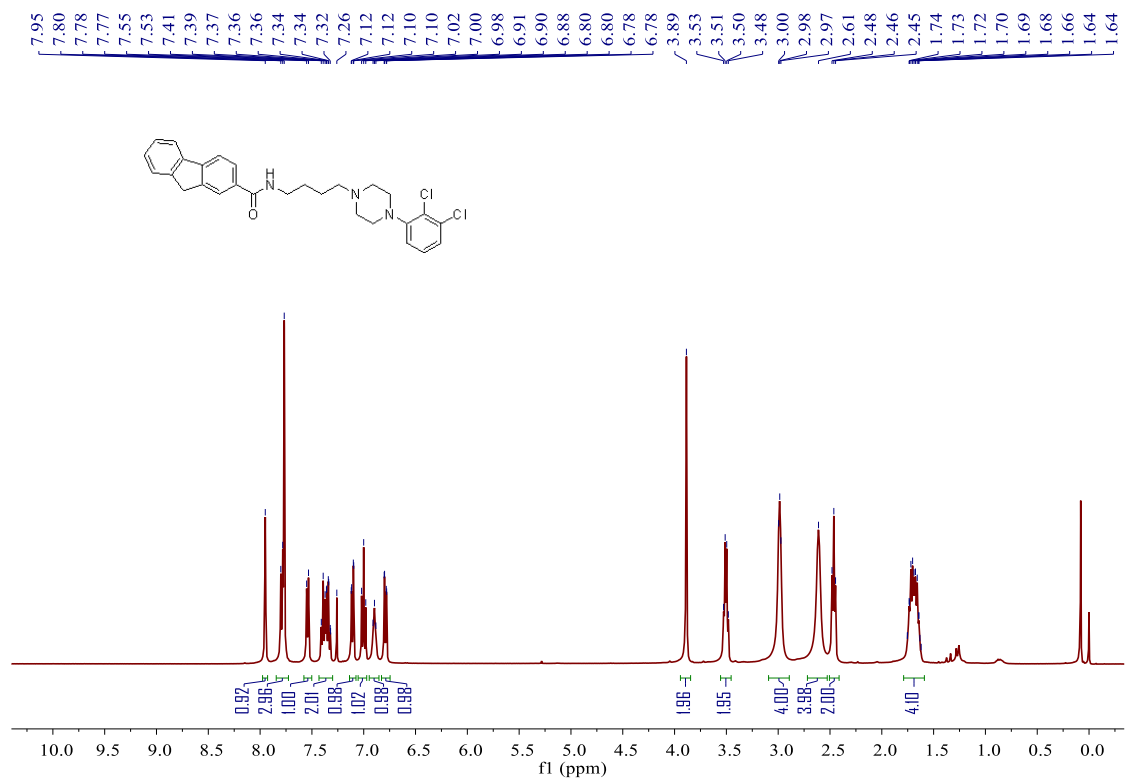

Fig. S183. <sup>1</sup>H NMR (400 MHz, CDCl<sub>3</sub>, 298 K) spectrum of compound 14.

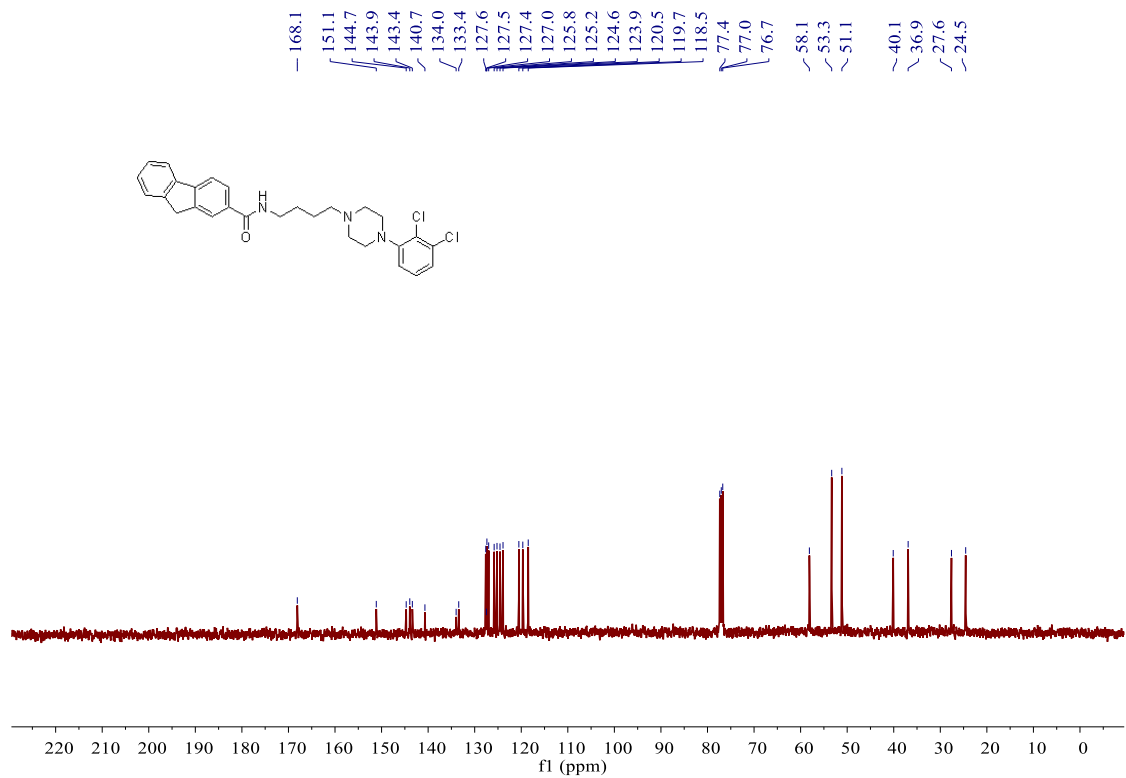

Fig. S184. <sup>13</sup>C NMR (101 MHz, CDCl<sub>3</sub>, 298 K) spectrum of compound 14.

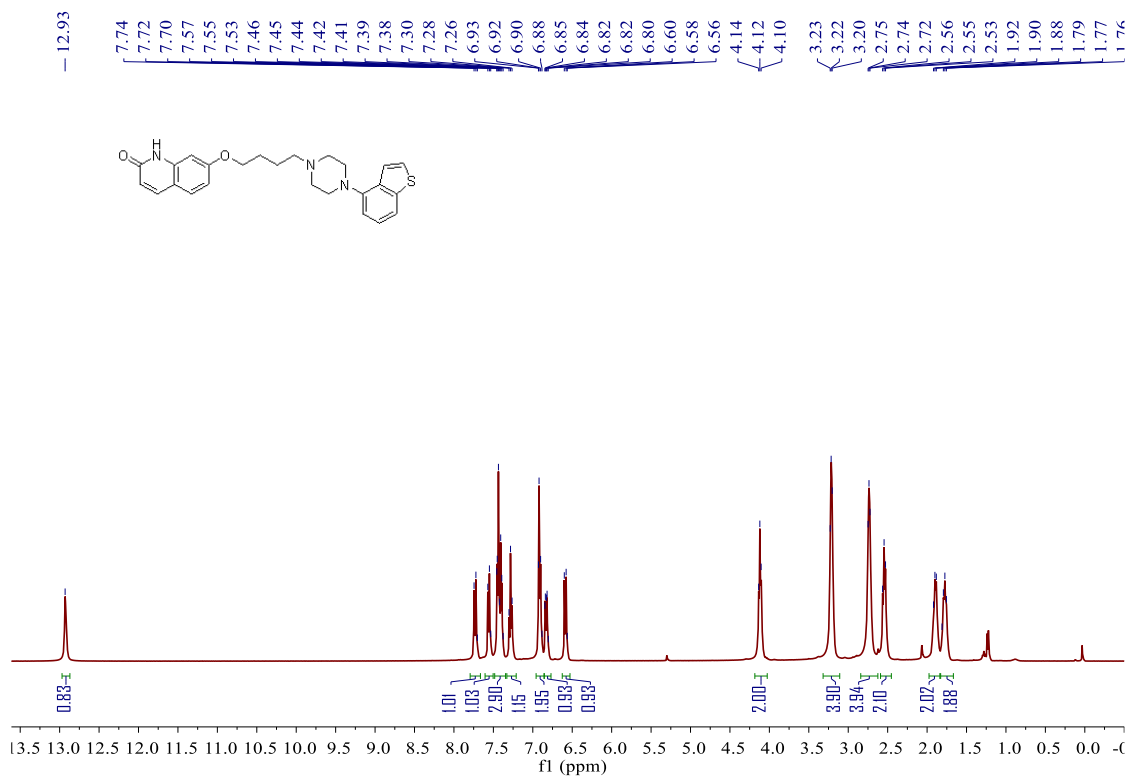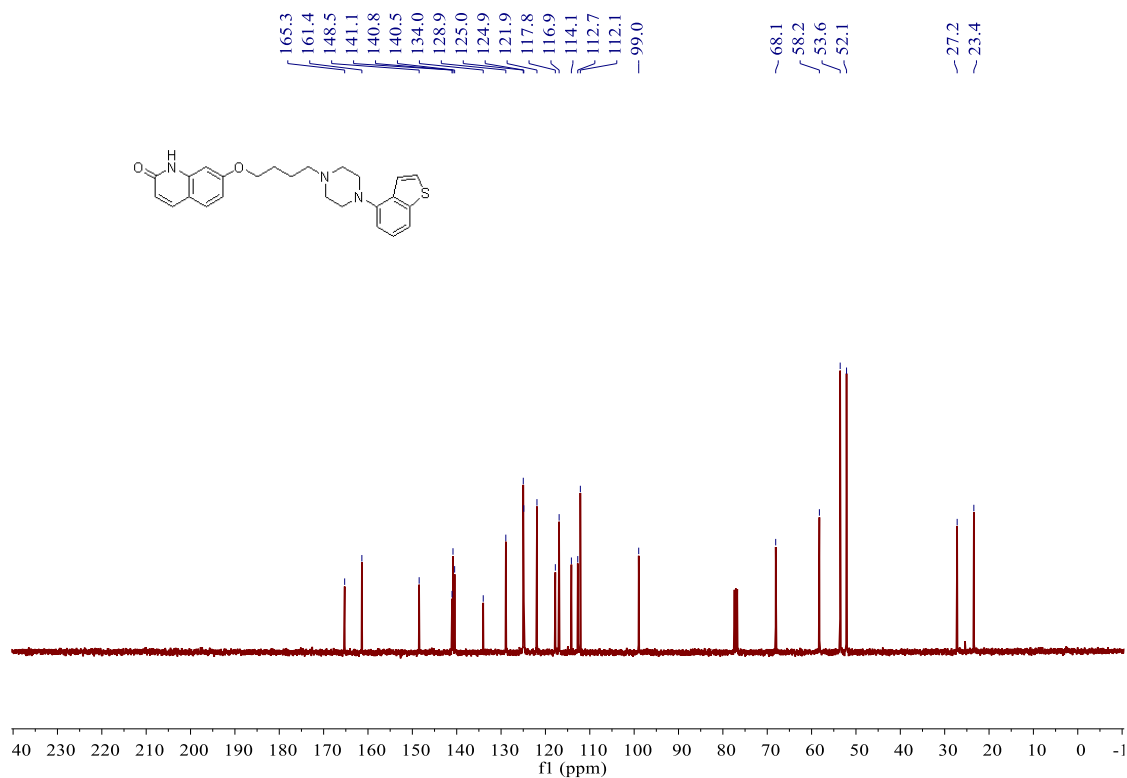

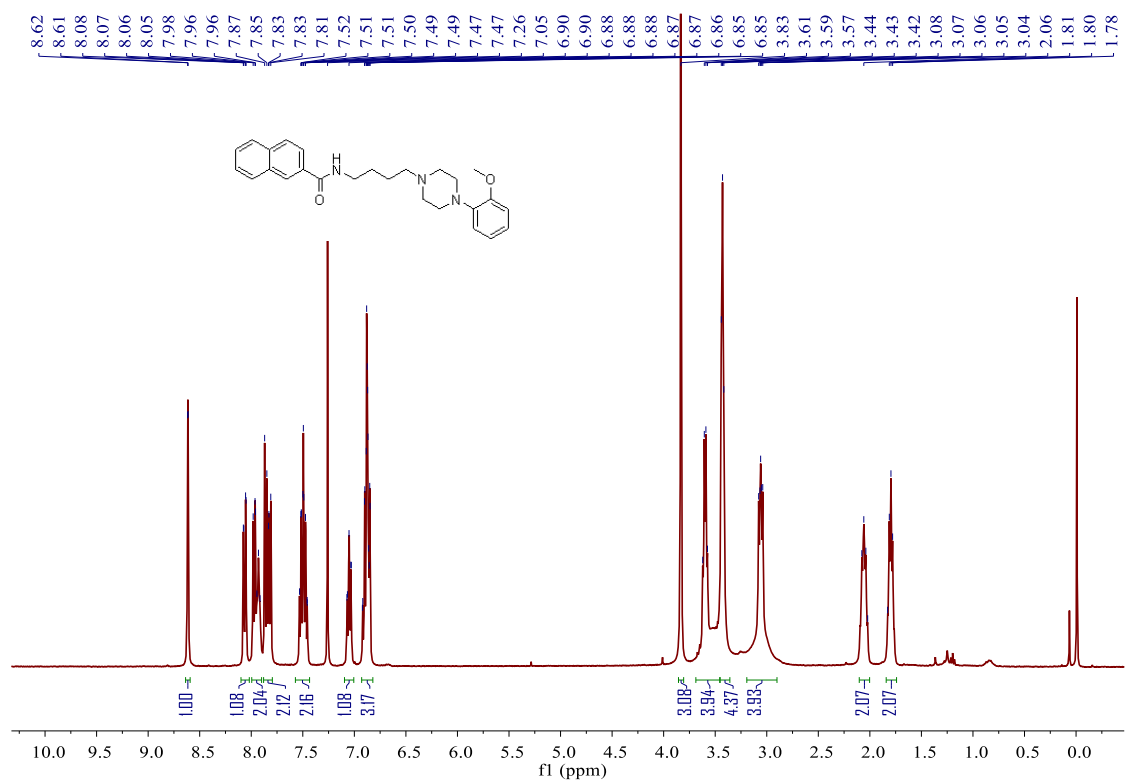

Fig. S187. <sup>1</sup>H NMR (400 MHz, CDCl<sub>3</sub>, 298 K) spectrum of compound 16.

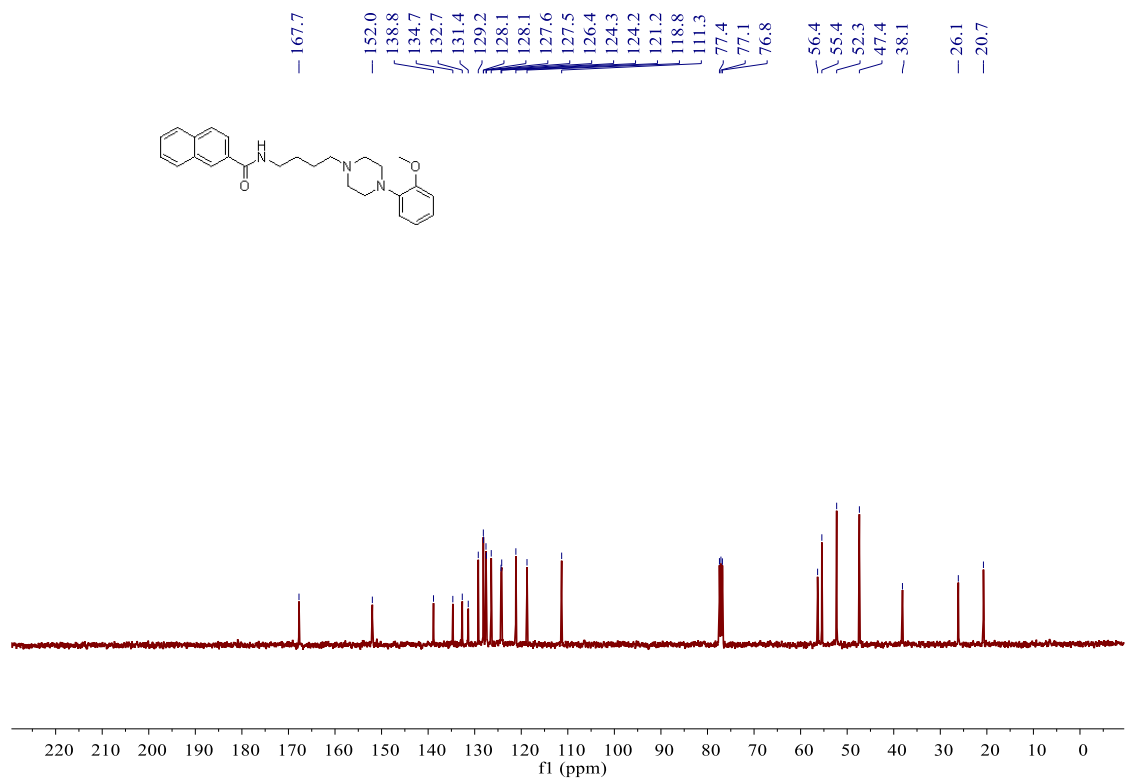

Fig. S188. <sup>13</sup>C NMR (101 MHz, CDCl<sub>3</sub>, 298 K) spectrum of compound 16.

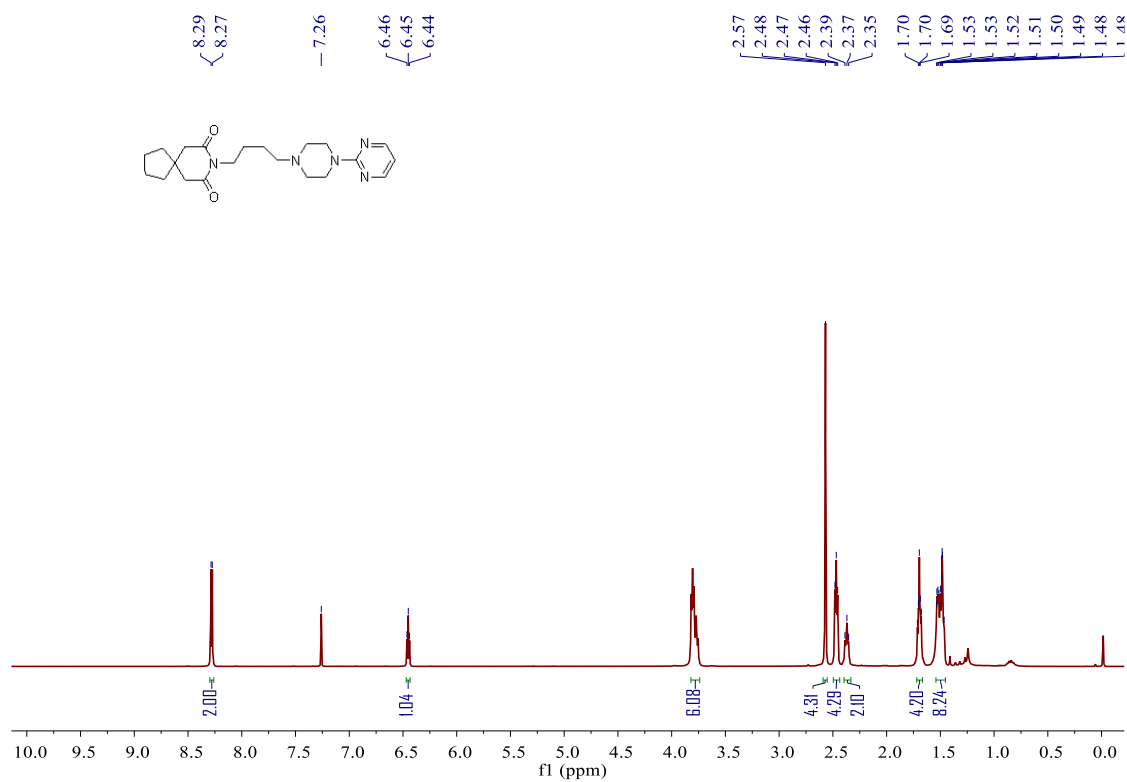

**Fig. S189.** <sup>1</sup>H NMR (400 MHz, CDCl<sub>3</sub>, 298 K) spectrum of compound 18.

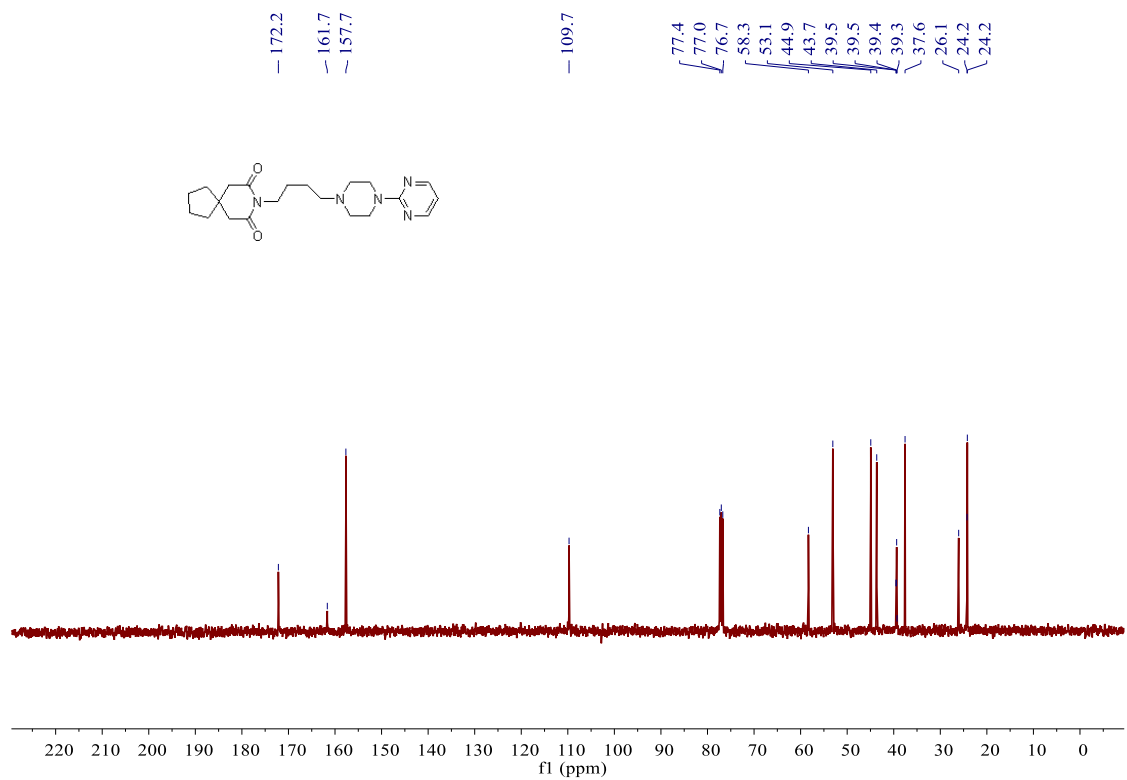

**Fig. S190.** <sup>13</sup>C NMR (101 MHz, CDCl<sub>3</sub>, 298 K) spectrum of compound 18.

## 11. High-resolution mass spectra

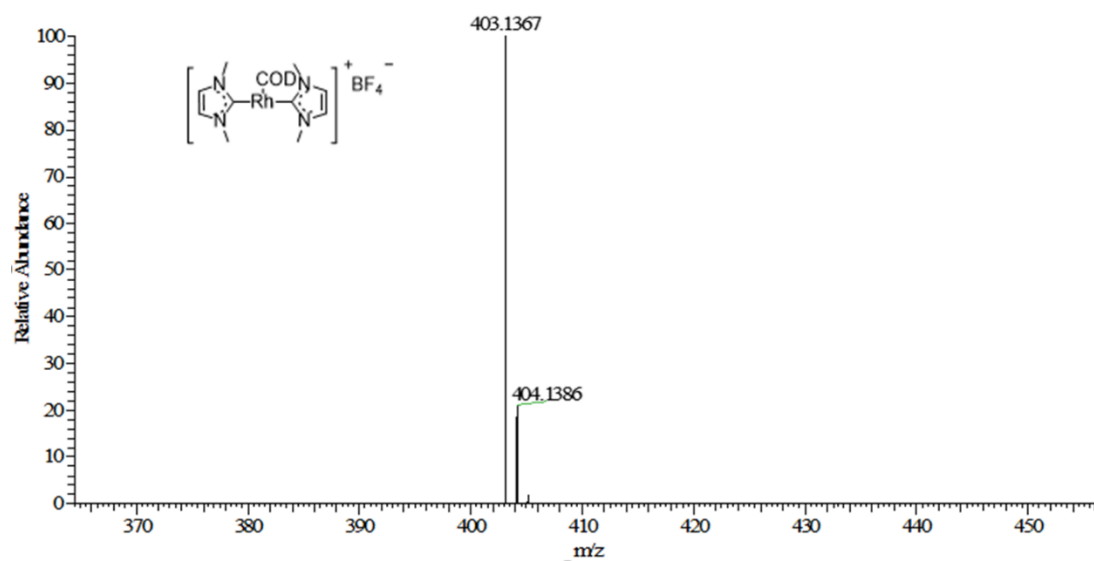

Fig. S191. HR-MS spectrum of compound 2.

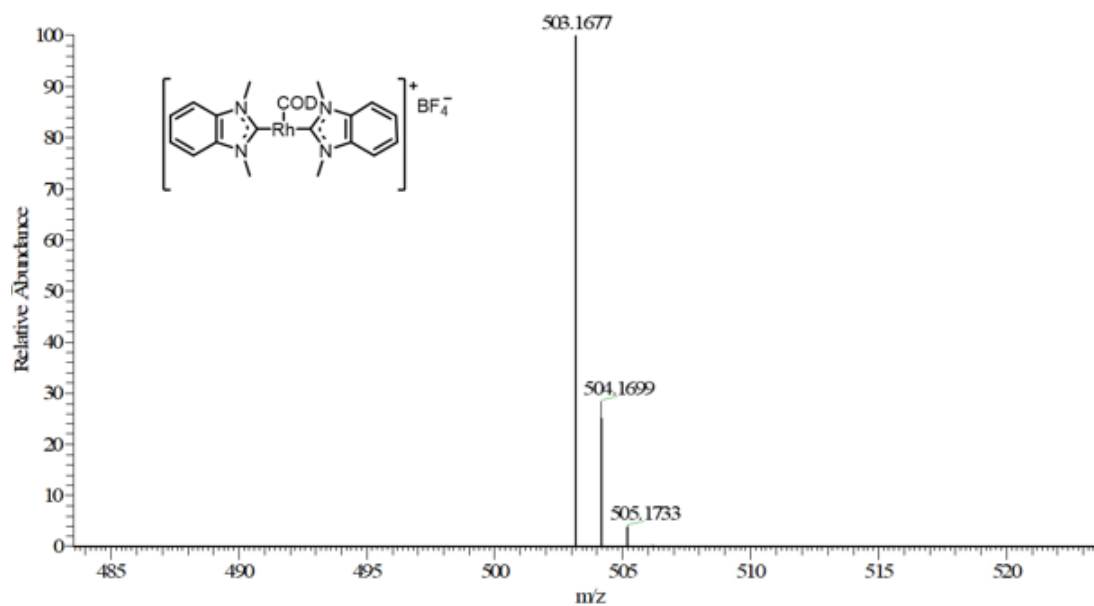

Fig. S192. HR-MS spectrum of compound 3.

**Analysis Info**

Analysis Name D:\Data\2021MS\TT\0311\QC210308\_RC5\_01\_832.d  
Method tune\_wide\_500-3000\_pos-3min.m  
Sample Name QC210308  
Comment

Acquisition Date 3/11/2021 3:16:57 PM

Operator gftang  
Instrument / Ser# micrOTOF 10257

**Acquisition Parameter**

|             |            |                      |          |                  |           |
|-------------|------------|----------------------|----------|------------------|-----------|
| Source Type | ESI        | Ion Polarity         | Positive | Set Nebulizer    | 1.5 Bar   |
| Focus       | Not active |                      |          | Set Dry Heater   | 100 °C    |
| Scan Begin  | 500 m/z    | Set Capillary        | 4000 V   | Set Dry Gas      | 4.0 l/min |
| Scan End    | 2500 m/z   | Set End Plate Offset | -500 V   | Set Divert Valve | Waste     |

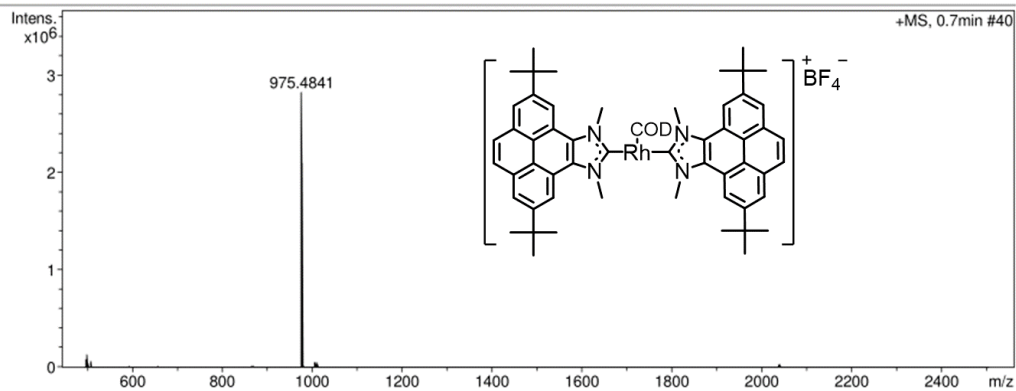

**Fig. S193.** HR-MS spectrum of compound **4b**.



## 12. Crystallography

**Table S5.** Crystal data and structure refinement for compound **2**

|                                   |                                                                   |          |
|-----------------------------------|-------------------------------------------------------------------|----------|
| Identification code               | compound <b>2</b>                                                 |          |
| Empirical formula                 | C <sub>18</sub> H <sub>28</sub> BF <sub>4</sub> N <sub>4</sub> Rh |          |
| Formula weight                    | 490.14                                                            |          |
| Temperature                       | 173(2) K                                                          |          |
| Wavelength                        | 1.34138 Å                                                         |          |
| Crystal system                    | Tetragonal                                                        |          |
| Space group                       | I4 <sub>1</sub> /acd                                              |          |
| Unit cell dimensions              | a = 15.9403(10) Å                                                 | α = 90 ° |
|                                   | b = 15.9403(10) Å                                                 | β = 90 ° |
|                                   | c = 31.662(2) Å                                                   | γ = 90 ° |
| Volume                            | 8045.0(12) Å <sup>3</sup>                                         |          |
| Z                                 | 72                                                                |          |
| Density (calculated)              | 1.619 mg/m <sup>3</sup>                                           |          |
| Absorption coefficient            | 4.919 mm <sup>-1</sup>                                            |          |
| F(000)                            | 4000                                                              |          |
| Crystal size                      | 0.160 x 0.120 x 0.050 mm <sup>3</sup>                             |          |
| Theta range for data collection   | 4.189 to 56.993 °                                                 |          |
| Index ranges                      | -19 ≤ h ≤ 19, -19 ≤ k ≤ 19, -39 ≤ l ≤ 35                          |          |
| Reflections collected             | 54960                                                             |          |
| Independent reflections           | 2064 [R(int) = 0.0543]                                            |          |
| Completeness to theta = 53.594 °  | 99.9 %                                                            |          |
| Absorption correction             | Semi-empirical from equivalents                                   |          |
| Max. and min. transmission        | 0.751 and 0.554                                                   |          |
| Refinement method                 | Full-matrix least-squares on F <sup>2</sup>                       |          |
| Data / restraints / parameters    | 2064 / 42 / 149                                                   |          |
| Goodness-of-fit on F <sup>2</sup> | 1.121                                                             |          |
| Final R indices [I > 2σ(I)]       | R1 = 0.0387, wR2 = 0.1083                                         |          |
| R indices (all data)              | R1 = 0.0427, wR2 = 0.1118                                         |          |
| Extinction coefficient            | n/a                                                               |          |
| Largest diff. peak and hole       | 2.342 and -1.185 e.Å <sup>-3</sup>                                |          |

**Table S6.** Bond lengths [Å] and angles [°] for Rh complex **2**.

---

|              |           |
|--------------|-----------|
| Rh(1)-C(1)#1 | 2.045(4)  |
| Rh(1)-C(1)   | 2.045(4)  |
| Rh(1)-C(6)#1 | 2.203(3)  |
| Rh(1)-C(6)   | 2.203(3)  |
| Rh(1)-C(6')  | 2.203(3)  |
| Rh(1)-C(9)#1 | 2.205(3)  |
| Rh(1)-C(9')  | 2.205(3)  |
| Rh(1)-C(9)   | 2.205(3)  |
| B(1)-F(1)    | 1.342(3)  |
| B(1)-F(1)#2  | 1.342(3)  |
| B(1)-F(1)#3  | 1.342(3)  |
| B(1)-F(1)#4  | 1.342(3)  |
| B(2)-F(2)#5  | 1.308(4)  |
| B(2)-F(2)#6  | 1.308(4)  |
| B(2)-F(2)#7  | 1.308(4)  |
| B(2)-F(2)    | 1.308(4)  |
| N(1)-C(1)    | 1.358(5)  |
| N(1)-C(3)    | 1.383(5)  |
| N(1)-C(4)    | 1.447(5)  |
| N(2)-C(1)    | 1.358(5)  |
| N(2)-C(2)    | 1.381(5)  |
| N(2)-C(5)    | 1.458(6)  |
| C(2)-C(3)    | 1.337(7)  |
| C(2)-H(2)    | 0.9500    |
| C(3)-H(3)    | 0.9500    |
| C(4)-H(4A)   | 0.9800    |
| C(4)-H(4B)   | 0.9800    |
| C(4)-H(4C)   | 0.9800    |
| C(5)-H(5A)   | 0.9800    |
| C(5)-H(5B)   | 0.9800    |
| C(5)-H(5C)   | 0.9800    |
| C(6)-C(9)#1  | 1.380(6)  |
| C(6)-C(7)    | 1.544(11) |
| C(6)-H(6)    | 0.9500    |
| C(7)-C(8)    | 1.513(16) |
| C(7)-H(7A)   | 0.9900    |

|                     |            |
|---------------------|------------|
| C(7)-H(7B)          | 0.9900     |
| C(8)-C(9)           | 1.501(11)  |
| C(8)-H(8A)          | 0.9900     |
| C(8)-H(8B)          | 0.9900     |
| C(9)-H(9)           | 0.9500     |
| C(6')-C(7')         | 1.504(14)  |
| C(6')-H(6')         | 0.9500     |
| C(7')-C(8')         | 1.544(19)  |
| C(7')-H(7'1)        | 0.9900     |
| C(7')-H(7'2)        | 0.9900     |
| C(8')-C(9')         | 1.571(12)  |
| C(8')-H(8'1)        | 0.9900     |
| C(8')-H(8'2)        | 0.9900     |
| C(9')-H(9')         | 0.9500     |
|                     |            |
| C(1)#1-Rh(1)-C(1)   | 91.20(18)  |
| C(1)#1-Rh(1)-C(6)#1 | 160.08(15) |
| C(1)-Rh(1)-C(6)#1   | 91.80(13)  |
| C(1)#1-Rh(1)-C(6)   | 91.80(13)  |
| C(1)-Rh(1)-C(6)     | 160.08(15) |
| C(6)#1-Rh(1)-C(6)   | 92.0(2)    |
| C(1)#1-Rh(1)-C(6')  | 91.80(13)  |
| C(1)-Rh(1)-C(6')    | 160.08(15) |
| C(1)#1-Rh(1)-C(9)#1 | 90.69(13)  |
| C(1)-Rh(1)-C(9)#1   | 163.12(15) |
| C(6)#1-Rh(1)-C(9)#1 | 80.94(13)  |
| C(6)-Rh(1)-C(9)#1   | 36.48(15)  |
| C(6')-Rh(1)-C(9)#1  | 36.48(15)  |
| C(1)#1-Rh(1)-C(9')  | 163.12(15) |
| C(1)-Rh(1)-C(9')    | 90.69(13)  |
| C(6')-Rh(1)-C(9')   | 80.94(13)  |
| C(1)#1-Rh(1)-C(9)   | 163.12(15) |
| C(1)-Rh(1)-C(9)     | 90.69(13)  |
| C(6)#1-Rh(1)-C(9)   | 36.47(15)  |
| C(6)-Rh(1)-C(9)     | 80.94(13)  |
| C(9)#1-Rh(1)-C(9)   | 92.4(2)    |
| F(1)-B(1)-F(1)#2    | 108.7(5)   |
| F(1)-B(1)-F(1)#3    | 108.8(4)   |

|                    |          |
|--------------------|----------|
| F(1)#2-B(1)-F(1)#3 | 111.0(5) |
| F(1)-B(1)-F(1)#4   | 111.0(5) |
| F(1)#2-B(1)-F(1)#4 | 108.8(4) |
| F(1)#3-B(1)-F(1)#4 | 108.7(5) |
| F(2)#5-B(2)-F(2)#6 | 111.9(6) |
| F(2)#5-B(2)-F(2)#7 | 108.3(3) |
| F(2)#6-B(2)-F(2)#7 | 108.3(3) |
| F(2)#5-B(2)-F(2)   | 108.3(3) |
| F(2)#6-B(2)-F(2)   | 108.3(3) |
| F(2)#7-B(2)-F(2)   | 111.9(6) |
| C(1)-N(1)-C(3)     | 111.9(3) |
| C(1)-N(1)-C(4)     | 124.7(3) |
| C(3)-N(1)-C(4)     | 123.4(3) |
| C(1)-N(2)-C(2)     | 111.7(3) |
| C(1)-N(2)-C(5)     | 124.8(3) |
| C(2)-N(2)-C(5)     | 123.4(3) |
| N(2)-C(1)-N(1)     | 103.1(3) |
| N(2)-C(1)-Rh(1)    | 128.3(3) |
| N(1)-C(1)-Rh(1)    | 128.5(3) |
| C(3)-C(2)-N(2)     | 106.9(3) |
| C(3)-C(2)-H(2)     | 126.6    |
| N(2)-C(2)-H(2)     | 126.6    |
| C(2)-C(3)-N(1)     | 106.3(3) |
| C(2)-C(3)-H(3)     | 126.8    |
| N(1)-C(3)-H(3)     | 126.8    |
| N(1)-C(4)-H(4A)    | 109.5    |
| N(1)-C(4)-H(4B)    | 109.5    |
| H(4A)-C(4)-H(4B)   | 109.5    |
| N(1)-C(4)-H(4C)    | 109.5    |
| H(4A)-C(4)-H(4C)   | 109.5    |
| H(4B)-C(4)-H(4C)   | 109.5    |
| N(2)-C(5)-H(5A)    | 109.5    |
| N(2)-C(5)-H(5B)    | 109.5    |
| H(5A)-C(5)-H(5B)   | 109.5    |
| N(2)-C(5)-H(5C)    | 109.5    |
| H(5A)-C(5)-H(5C)   | 109.5    |
| H(5B)-C(5)-H(5C)   | 109.5    |
| C(9)#1-C(6)-C(7)   | 117.4(6) |

|                     |           |
|---------------------|-----------|
| C(9)#1-C(6)-Rh(1)   | 71.9(2)   |
| C(7)-C(6)-Rh(1)     | 110.0(4)  |
| C(9)#1-C(6)-H(6)    | 121.3     |
| C(7)-C(6)-H(6)      | 121.3     |
| Rh(1)-C(6)-H(6)     | 88.3      |
| C(8)-C(7)-C(6)      | 113.4(8)  |
| C(8)-C(7)-H(7A)     | 108.9     |
| C(6)-C(7)-H(7A)     | 108.9     |
| C(8)-C(7)-H(7B)     | 108.9     |
| C(6)-C(7)-H(7B)     | 108.9     |
| H(7A)-C(7)-H(7B)    | 107.7     |
| C(9)-C(8)-C(7)      | 112.1(8)  |
| C(9)-C(8)-H(8A)     | 109.2     |
| C(7)-C(8)-H(8A)     | 109.2     |
| C(9)-C(8)-H(8B)     | 109.2     |
| C(7)-C(8)-H(8B)     | 109.2     |
| H(8A)-C(8)-H(8B)    | 107.9     |
| C(6)#1-C(9)-C(8)    | 135.6(6)  |
| C(6)#1-C(9)-Rh(1)   | 71.7(2)   |
| C(8)-C(9)-Rh(1)     | 107.1(4)  |
| C(6)#1-C(9)-H(9)    | 112.2     |
| C(8)-C(9)-H(9)      | 112.2     |
| Rh(1)-C(9)-H(9)     | 91.6      |
| C(7')-C(6')-Rh(1)   | 106.5(5)  |
| C(7')-C(6')-H(6')   | 126.8     |
| Rh(1)-C(6')-H(6')   | 126.8     |
| C(6')-C(7')-C(8')   | 109.7(9)  |
| C(6')-C(7')-H(7'1)  | 109.7     |
| C(8')-C(7')-H(7'1)  | 109.7     |
| C(6')-C(7')-H(7'2)  | 109.7     |
| C(8')-C(7')-H(7'2)  | 109.7     |
| H(7'1)-C(7')-H(7'2) | 108.2     |
| C(7')-C(8')-C(9')   | 110.6(10) |
| C(7')-C(8')-H(8'1)  | 109.5     |
| C(9')-C(8')-H(8'1)  | 109.5     |
| C(7')-C(8')-H(8'2)  | 109.5     |
| C(9')-C(8')-H(8'2)  | 109.5     |
| H(8'1)-C(8')-H(8'2) | 108.1     |

|                   |          |
|-------------------|----------|
| C(8')-C(9')-Rh(1) | 109.8(5) |
| C(8')-C(9')-H(9') | 125.1    |
| Rh(1)-C(9')-H(9') | 125.1    |

---

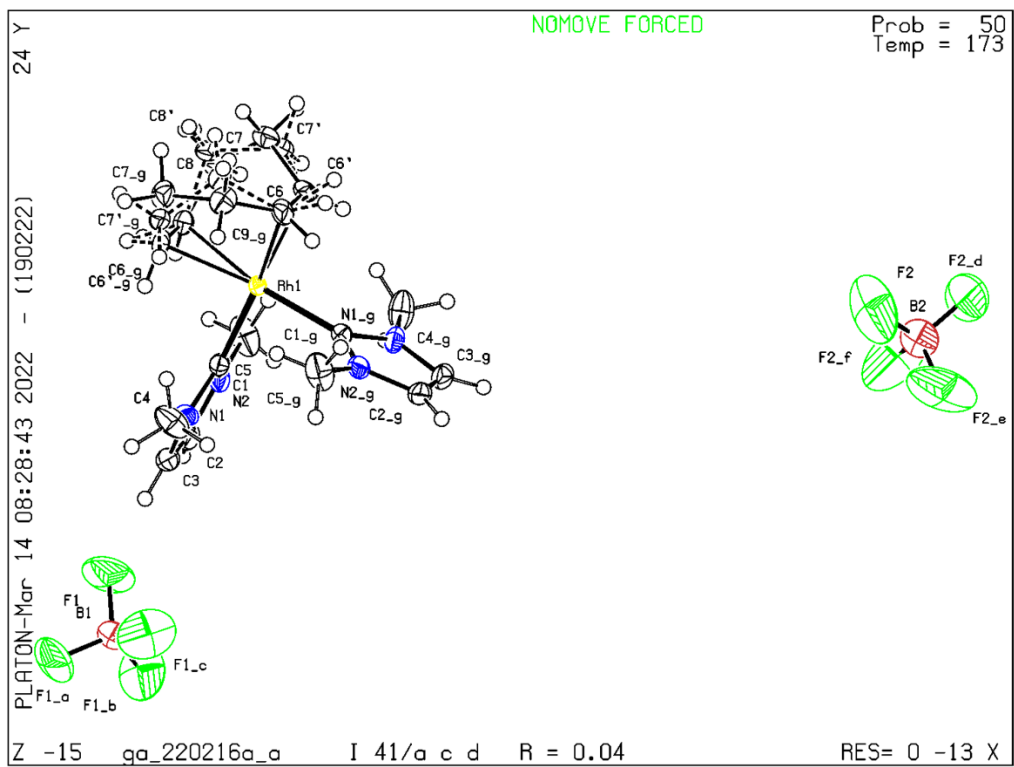

Fig. S194. Crystal structure of rhodium complex 2.

**Table S7.** Crystal data and structure refinement for compound **3**

|                                   |                                             |                            |
|-----------------------------------|---------------------------------------------|----------------------------|
| Identification code               | compound <b>3</b>                           |                            |
| Empirical formula                 | $C_{13.50}H_{17}B_{0.50}ClF_2N_2Rh_{0.50}$  |                            |
| Formula weight                    | 337.60                                      |                            |
| Temperature                       | 181(2) K                                    |                            |
| Wavelength                        | 1.34138 Å                                   |                            |
| Crystal system                    | Monoclinic                                  |                            |
| Space group                       | P2 <sub>1</sub> /n                          |                            |
| Unit cell dimensions              | a = 13.6170(10) Å                           | $\alpha = 90^\circ$        |
|                                   | b = 17.2920(12) Å                           | $\beta = 116.871(2)^\circ$ |
|                                   | c = 13.8897(10) Å                           | $\gamma = 90^\circ$        |
| Volume                            | 2917.4(4) Å <sup>3</sup>                    |                            |
| Z                                 | 8                                           |                            |
| Density (calculated)              | 1.537 Mg/m <sup>3</sup>                     |                            |
| Absorption coefficient            | 4.603 mm <sup>-1</sup>                      |                            |
| F(000)                            | 1376                                        |                            |
| Crystal size                      | 0.160 x 0.120 x 0.090 mm <sup>3</sup>       |                            |
| Theta range for data collection   | 5.346 to 59.478 °                           |                            |
| Index ranges                      | -16 ≤ h ≤ 17, -22 ≤ k ≤ 22, -17 ≤ l ≤ 17    |                            |
| Reflections collected             | 34511                                       |                            |
| Independent reflections           | 6455 [R(int) = 0.0634]                      |                            |
| Completeness to theta = 53.594 °  | 99.7 %                                      |                            |
| Absorption correction             | Semi-empirical from equivalents             |                            |
| Max. and min. transmission        | 0.752 and 0.435                             |                            |
| Refinement method                 | Full-matrix least-squares on F <sup>2</sup> |                            |
| Data / restraints / parameters    | 6455 / 37 / 391                             |                            |
| Goodness-of-fit on F <sup>2</sup> | 1.035                                       |                            |
| Final R indices [I > 2σ(I)]       | R1 = 0.0370, wR2 = 0.0895                   |                            |
| R indices (all data)              | R1 = 0.0428, wR2 = 0.0941                   |                            |
| Extinction coefficient            | n/a                                         |                            |
| Largest diff. peak and hole       | 0.957 and -1.120 e.Å <sup>-3</sup>          |                            |



**Table S8.** Bond lengths [Å] and angles [°] for Rh complex **3**.

---

|             |          |
|-------------|----------|
| Rh(1)-C(1)  | 2.036(3) |
| Rh(1)-C(10) | 2.045(3) |
| Rh(1)-C(23) | 2.200(3) |
| Rh(1)-C(20) | 2.203(3) |
| Rh(1)-C(19) | 2.206(3) |
| Rh(1)-C(24) | 2.208(3) |
| B(1)-F(3)   | 1.358(4) |
| B(1)-F(4)   | 1.365(4) |
| B(1)-F(1)   | 1.371(4) |
| B(1)-F(2)   | 1.379(4) |
| N(1)-C(1)   | 1.359(3) |
| N(1)-C(7)   | 1.391(3) |
| N(1)-C(8)   | 1.457(4) |
| N(2)-C(1)   | 1.356(3) |
| N(2)-C(2)   | 1.389(3) |
| N(2)-C(9)   | 1.451(3) |
| N(3)-C(10)  | 1.357(3) |
| N(3)-C(16)  | 1.388(3) |
| N(3)-C(17)  | 1.459(4) |
| N(4)-C(10)  | 1.360(3) |
| N(4)-C(11)  | 1.393(3) |
| N(4)-C(18)  | 1.458(3) |
| C(2)-C(7)   | 1.382(4) |
| C(2)-C(3)   | 1.390(4) |
| C(3)-C(4)   | 1.384(4) |
| C(3)-H(3)   | 0.9500   |
| C(4)-C(5)   | 1.385(5) |
| C(4)-H(4)   | 0.9500   |
| C(5)-C(6)   | 1.388(4) |
| C(5)-H(5)   | 0.9500   |
| C(6)-C(7)   | 1.391(4) |
| C(6)-H(6)   | 0.9500   |
| C(8)-H(8A)  | 0.9800   |
| C(8)-H(8B)  | 0.9800   |
| C(8)-H(8C)  | 0.9800   |
| C(9)-H(9A)  | 0.9800   |

|               |           |
|---------------|-----------|
| C(9)-H(9B)    | 0.9800    |
| C(9)-H(9C)    | 0.9800    |
| C(11)-C(16)   | 1.387(4)  |
| C(11)-C(12)   | 1.390(4)  |
| C(12)-C(13)   | 1.392(5)  |
| C(12)-H(12)   | 0.9500    |
| C(13)-C(14)   | 1.386(5)  |
| C(13)-H(13)   | 0.9500    |
| C(14)-C(15)   | 1.387(4)  |
| C(14)-H(14)   | 0.9500    |
| C(15)-C(16)   | 1.392(4)  |
| C(15)-H(15)   | 0.9500    |
| C(17)-H(17A)  | 0.9800    |
| C(17)-H(17B)  | 0.9800    |
| C(17)-H(17C)  | 0.9800    |
| C(18)-H(18A)  | 0.9800    |
| C(18)-H(18B)  | 0.9800    |
| C(18)-H(18C)  | 0.9800    |
| C(19)-C(20)   | 1.377(4)  |
| C(19)-C(26)   | 1.506(4)  |
| C(19)-H(19)   | 0.95(3)   |
| C(20)-C(21)   | 1.490(6)  |
| C(20)-C(21')  | 1.591(13) |
| C(20)-H(20)   | 1.02(3)   |
| C(21)-C(22)   | 1.529(10) |
| C(21)-H(21A)  | 0.9900    |
| C(21)-H(21B)  | 0.9900    |
| C(22)-C(23)   | 1.517(8)  |
| C(22)-H(22A)  | 0.9900    |
| C(22)-H(22B)  | 0.9900    |
| C(21')-C(22') | 1.509(16) |
| C(21')-H(21C) | 0.9900    |
| C(21')-H(21D) | 0.9900    |
| C(22')-C(23)  | 1.527(16) |
| C(22')-H(22C) | 0.9900    |
| C(22')-H(22D) | 0.9900    |
| C(23)-C(24)   | 1.375(4)  |
| C(23)-H(23)   | 0.98(3)   |

|                   |            |
|-------------------|------------|
| C(24)-C(25)       | 1.506(4)   |
| C(24)-H(24)       | 0.97(3)    |
| C(25)-C(26)       | 1.467(5)   |
| C(25)-H(25A)      | 0.9900     |
| C(25)-H(25B)      | 0.9900     |
| C(26)-H(26A)      | 0.9900     |
| C(26)-H(26B)      | 0.9900     |
| C(27)-Cl(2)       | 1.740(4)   |
| C(27)-Cl(1)       | 1.748(4)   |
| C(27)-H(27A)      | 0.9900     |
| C(27)-H(27B)      | 0.9900     |
|                   |            |
| C(1)-Rh(1)-C(10)  | 92.42(10)  |
| C(1)-Rh(1)-C(23)  | 158.36(11) |
| C(10)-Rh(1)-C(23) | 93.15(10)  |
| C(1)-Rh(1)-C(20)  | 87.94(11)  |
| C(10)-Rh(1)-C(20) | 163.28(11) |
| C(23)-Rh(1)-C(20) | 80.84(11)  |
| C(1)-Rh(1)-C(19)  | 91.94(10)  |
| C(10)-Rh(1)-C(19) | 160.07(11) |
| C(23)-Rh(1)-C(19) | 89.90(11)  |
| C(20)-Rh(1)-C(19) | 36.39(11)  |
| C(1)-Rh(1)-C(24)  | 164.56(11) |
| C(10)-Rh(1)-C(24) | 89.71(10)  |
| C(23)-Rh(1)-C(24) | 36.36(11)  |
| C(20)-Rh(1)-C(24) | 94.38(12)  |
| C(19)-Rh(1)-C(24) | 81.13(11)  |
| F(3)-B(1)-F(4)    | 108.9(3)   |
| F(3)-B(1)-F(1)    | 108.7(3)   |
| F(4)-B(1)-F(1)    | 110.6(3)   |
| F(3)-B(1)-F(2)    | 110.1(3)   |
| F(4)-B(1)-F(2)    | 110.6(3)   |
| F(1)-B(1)-F(2)    | 107.9(3)   |
| C(1)-N(1)-C(7)    | 110.7(2)   |
| C(1)-N(1)-C(8)    | 126.0(2)   |
| C(7)-N(1)-C(8)    | 123.0(2)   |
| C(1)-N(2)-C(2)    | 111.2(2)   |
| C(1)-N(2)-C(9)    | 125.7(2)   |

|                  |            |
|------------------|------------|
| C(2)-N(2)-C(9)   | 123.0(2)   |
| C(10)-N(3)-C(16) | 111.1(2)   |
| C(10)-N(3)-C(17) | 125.7(2)   |
| C(16)-N(3)-C(17) | 123.3(2)   |
| C(10)-N(4)-C(11) | 111.0(2)   |
| C(10)-N(4)-C(18) | 125.8(2)   |
| C(11)-N(4)-C(18) | 123.2(2)   |
| N(2)-C(1)-N(1)   | 105.5(2)   |
| N(2)-C(1)-Rh(1)  | 127.39(19) |
| N(1)-C(1)-Rh(1)  | 126.87(19) |
| C(7)-C(2)-N(2)   | 106.0(2)   |
| C(7)-C(2)-C(3)   | 122.2(3)   |
| N(2)-C(2)-C(3)   | 131.8(3)   |
| C(4)-C(3)-C(2)   | 115.8(3)   |
| C(4)-C(3)-H(3)   | 122.1      |
| C(2)-C(3)-H(3)   | 122.1      |
| C(3)-C(4)-C(5)   | 122.4(3)   |
| C(3)-C(4)-H(4)   | 118.8      |
| C(5)-C(4)-H(4)   | 118.8      |
| C(4)-C(5)-C(6)   | 121.8(3)   |
| C(4)-C(5)-H(5)   | 119.1      |
| C(6)-C(5)-H(5)   | 119.1      |
| C(5)-C(6)-C(7)   | 116.1(3)   |
| C(5)-C(6)-H(6)   | 122.0      |
| C(7)-C(6)-H(6)   | 122.0      |
| C(2)-C(7)-N(1)   | 106.5(2)   |
| C(2)-C(7)-C(6)   | 121.8(3)   |
| N(1)-C(7)-C(6)   | 131.6(3)   |
| N(1)-C(8)-H(8A)  | 109.5      |
| N(1)-C(8)-H(8B)  | 109.5      |
| H(8A)-C(8)-H(8B) | 109.5      |
| N(1)-C(8)-H(8C)  | 109.5      |
| H(8A)-C(8)-H(8C) | 109.5      |
| H(8B)-C(8)-H(8C) | 109.5      |
| N(2)-C(9)-H(9A)  | 109.5      |
| N(2)-C(9)-H(9B)  | 109.5      |
| H(9A)-C(9)-H(9B) | 109.5      |
| N(2)-C(9)-H(9C)  | 109.5      |

|                     |            |
|---------------------|------------|
| H(9A)-C(9)-H(9C)    | 109.5      |
| H(9B)-C(9)-H(9C)    | 109.5      |
| N(3)-C(10)-N(4)     | 105.5(2)   |
| N(3)-C(10)-Rh(1)    | 127.9(2)   |
| N(4)-C(10)-Rh(1)    | 126.53(19) |
| C(16)-C(11)-C(12)   | 121.7(3)   |
| C(16)-C(11)-N(4)    | 106.0(2)   |
| C(12)-C(11)-N(4)    | 132.2(3)   |
| C(11)-C(12)-C(13)   | 116.0(3)   |
| C(11)-C(12)-H(12)   | 122.0      |
| C(13)-C(12)-H(12)   | 122.0      |
| C(14)-C(13)-C(12)   | 122.3(3)   |
| C(14)-C(13)-H(13)   | 118.9      |
| C(12)-C(13)-H(13)   | 118.9      |
| C(13)-C(14)-C(15)   | 121.8(3)   |
| C(13)-C(14)-H(14)   | 119.1      |
| C(15)-C(14)-H(14)   | 119.1      |
| C(14)-C(15)-C(16)   | 116.1(3)   |
| C(14)-C(15)-H(15)   | 122.0      |
| C(16)-C(15)-H(15)   | 122.0      |
| C(11)-C(16)-N(3)    | 106.4(2)   |
| C(11)-C(16)-C(15)   | 122.2(3)   |
| N(3)-C(16)-C(15)    | 131.4(3)   |
| N(3)-C(17)-H(17A)   | 109.5      |
| N(3)-C(17)-H(17B)   | 109.5      |
| H(17A)-C(17)-H(17B) | 109.5      |
| N(3)-C(17)-H(17C)   | 109.5      |
| H(17A)-C(17)-H(17C) | 109.5      |
| H(17B)-C(17)-H(17C) | 109.5      |
| N(4)-C(18)-H(18A)   | 109.5      |
| N(4)-C(18)-H(18B)   | 109.5      |
| H(18A)-C(18)-H(18B) | 109.5      |
| N(4)-C(18)-H(18C)   | 109.5      |
| H(18A)-C(18)-H(18C) | 109.5      |
| H(18B)-C(18)-H(18C) | 109.5      |
| C(20)-C(19)-C(26)   | 124.0(3)   |
| C(20)-C(19)-Rh(1)   | 71.68(16)  |
| C(26)-C(19)-Rh(1)   | 109.9(2)   |

|                      |           |
|----------------------|-----------|
| C(20)-C(19)-H(19)    | 117.8(19) |
| C(26)-C(19)-H(19)    | 115.0(19) |
| Rh(1)-C(19)-H(19)    | 106.3(19) |
| C(19)-C(20)-C(21)    | 132.6(4)  |
| C(19)-C(20)-C(21')   | 110.4(7)  |
| C(19)-C(20)-Rh(1)    | 71.93(16) |
| C(21)-C(20)-Rh(1)    | 105.4(3)  |
| C(21')-C(20)-Rh(1)   | 111.0(4)  |
| C(19)-C(20)-H(20)    | 115(2)    |
| C(21)-C(20)-H(20)    | 110(2)    |
| C(21')-C(20)-H(20)   | 127(2)    |
| Rh(1)-C(20)-H(20)    | 107(2)    |
| C(20)-C(21)-C(22)    | 113.1(5)  |
| C(20)-C(21)-H(21A)   | 109.0     |
| C(22)-C(21)-H(21A)   | 109.0     |
| C(20)-C(21)-H(21B)   | 109.0     |
| C(22)-C(21)-H(21B)   | 109.0     |
| H(21A)-C(21)-H(21B)  | 107.8     |
| C(23)-C(22)-C(21)    | 111.4(6)  |
| C(23)-C(22)-H(22A)   | 109.3     |
| C(21)-C(22)-H(22A)   | 109.3     |
| C(23)-C(22)-H(22B)   | 109.3     |
| C(21)-C(22)-H(22B)   | 109.3     |
| H(22A)-C(22)-H(22B)  | 108.0     |
| C(22')-C(21')-C(20)  | 110.4(12) |
| C(22')-C(21')-H(21C) | 109.6     |
| C(20)-C(21')-H(21C)  | 109.6     |
| C(22')-C(21')-H(21D) | 109.6     |
| C(20)-C(21')-H(21D)  | 109.6     |
| H(21C)-C(21')-H(21D) | 108.1     |
| C(21')-C(22')-C(23)  | 112.2(13) |
| C(21')-C(22')-H(22C) | 109.2     |
| C(23)-C(22')-H(22C)  | 109.2     |
| C(21')-C(22')-H(22D) | 109.2     |
| C(23)-C(22')-H(22D)  | 109.2     |
| H(22C)-C(22')-H(22D) | 107.9     |
| C(24)-C(23)-C(22)    | 121.0(4)  |
| C(24)-C(23)-C(22')   | 138.0(7)  |

|                     |           |
|---------------------|-----------|
| C(24)-C(23)-Rh(1)   | 72.11(16) |
| C(22)-C(23)-Rh(1)   | 111.0(4)  |
| C(22')-C(23)-Rh(1)  | 107.7(8)  |
| C(24)-C(23)-H(23)   | 116(2)    |
| C(22)-C(23)-H(23)   | 120(2)    |
| C(22')-C(23)-H(23)  | 105(2)    |
| Rh(1)-C(23)-H(23)   | 101.7(19) |
| C(23)-C(24)-C(25)   | 126.8(3)  |
| C(23)-C(24)-Rh(1)   | 71.52(15) |
| C(25)-C(24)-Rh(1)   | 108.0(2)  |
| C(23)-C(24)-H(24)   | 116.4(19) |
| C(25)-C(24)-H(24)   | 114.3(19) |
| Rh(1)-C(24)-H(24)   | 106.6(19) |
| C(26)-C(25)-C(24)   | 115.9(3)  |
| C(26)-C(25)-H(25A)  | 108.3     |
| C(24)-C(25)-H(25A)  | 108.3     |
| C(26)-C(25)-H(25B)  | 108.3     |
| C(24)-C(25)-H(25B)  | 108.3     |
| H(25A)-C(25)-H(25B) | 107.4     |
| C(25)-C(26)-C(19)   | 117.4(3)  |
| C(25)-C(26)-H(26A)  | 108.0     |
| C(19)-C(26)-H(26A)  | 108.0     |
| C(25)-C(26)-H(26B)  | 108.0     |
| C(19)-C(26)-H(26B)  | 108.0     |
| H(26A)-C(26)-H(26B) | 107.2     |
| Cl(2)-C(27)-Cl(1)   | 112.7(2)  |
| Cl(2)-C(27)-H(27A)  | 109.0     |
| Cl(1)-C(27)-H(27A)  | 109.0     |
| Cl(2)-C(27)-H(27B)  | 109.0     |
| Cl(1)-C(27)-H(27B)  | 109.0     |
| H(27A)-C(27)-H(27B) | 107.8     |

---

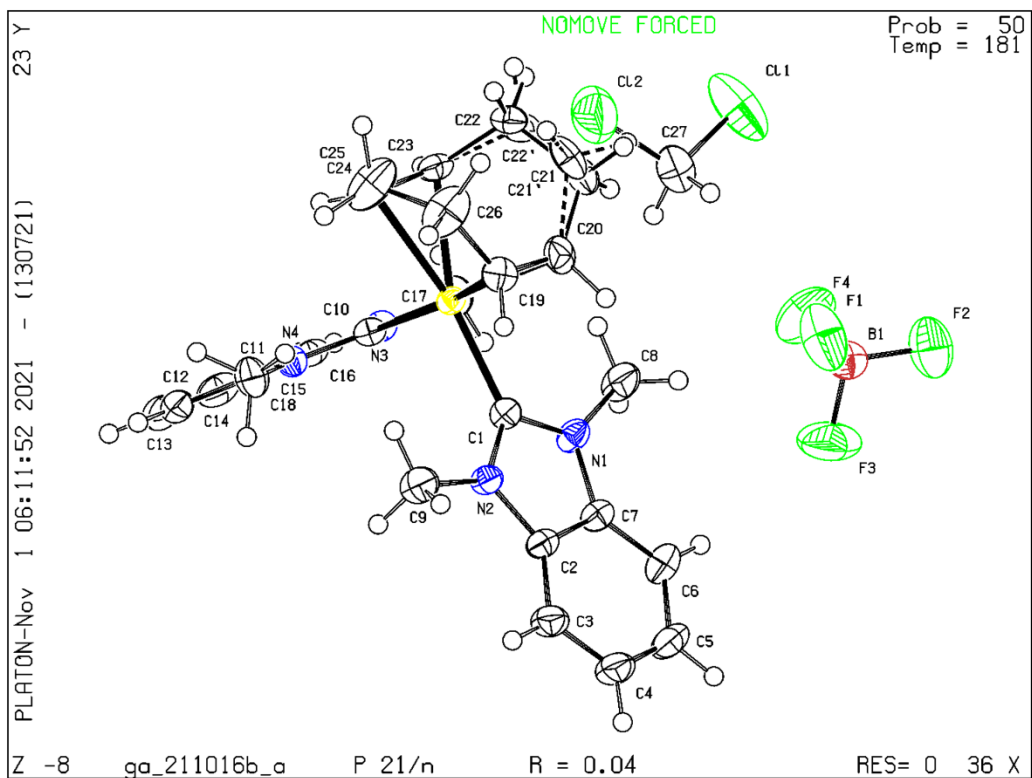

**Fig. S195.** Crystal structure of rhodium complex **3**.



**Table S9.** Crystal data and structure refinement for compound **4b**

|                                   |                                             |                           |
|-----------------------------------|---------------------------------------------|---------------------------|
| Identification code               | compound <b>4b</b>                          |                           |
| Empirical formula                 | $C_{127}H_{147}B_2Cl_9F_8N_8Rh_2$           |                           |
| Formula weight                    | 2484.01                                     |                           |
| Temperature                       | 175(2) K                                    |                           |
| Wavelength                        | 1.34138 Å                                   |                           |
| Crystal system                    | Monoclinic                                  |                           |
| Space group                       | P2 <sub>1</sub> /c                          |                           |
| Unit cell dimensions              | $a = 15.1914(9)$ Å                          | $\alpha = 90^\circ$       |
|                                   | $b = 15.8408(9)$ Å                          | $\beta = 93.157(2)^\circ$ |
|                                   | $c = 55.703(3)$ Å                           | $\gamma = 90^\circ$       |
| Volume                            | 13384.2(13) Å <sup>3</sup>                  |                           |
| Z                                 | 4                                           |                           |
| Density (calculated)              | 1.233 Mg/m <sup>3</sup>                     |                           |
| Absorption coefficient            | 2.755 mm <sup>-1</sup>                      |                           |
| F(000)                            | 5160                                        |                           |
| Crystal size                      | 0.250 x 0.220 x 0.180 mm <sup>3</sup>       |                           |
| Theta range for data collection   | 3.510 to 56.500 °                           |                           |
| Index ranges                      | -18 ≤ h ≤ 18, -19 ≤ k ≤ 18, -69 ≤ l ≤ 69    |                           |
| Reflections collected             | 148292                                      |                           |
| Independent reflections           | 26519 [R(int) = 0.0653]                     |                           |
| Completeness to theta = 53.594 °  | 99.0 %                                      |                           |
| Absorption correction             | Semi-empirical from equivalents             |                           |
| Max. and min. transmission        | 0.751 and 0.454                             |                           |
| Refinement method                 | Full-matrix least-squares on F <sup>2</sup> |                           |
| Data / restraints / parameters    | 26519 / 308 / 1482                          |                           |
| Goodness-of-fit on F <sup>2</sup> | 1.087                                       |                           |
| Final R indices [I > 2σ(I)]       | R1 = 0.1248, wR2 = 0.3036                   |                           |
| R indices (all data)              | R1 = 0.1326, wR2 = 0.3069                   |                           |
| Extinction coefficient            | n/a                                         |                           |
| Largest diff. peak and hole       | 1.428 and -2.474 e.Å <sup>-3</sup>          |                           |

**Table S10.** Bond lengths [ $\text{\AA}$ ] and angles [ $^\circ$ ] for Rh complex 4.

---

|              |           |
|--------------|-----------|
| Rh(1)-C(28)  | 2.057(8)  |
| Rh(1)-C(1)   | 2.061(8)  |
| Rh(1)-C(77)  | 2.187(9)  |
| Rh(1)-C(73)  | 2.188(8)  |
| Rh(1)-C(72)  | 2.202(9)  |
| Rh(1)-C(76)  | 2.214(9)  |
| Rh(2)-C(90)  | 2.062(9)  |
| Rh(2)-C(55)  | 2.072(9)  |
| Rh(2)-C(117) | 2.168(9)  |
| Rh(2)-C(118) | 2.203(9)  |
| Rh(2)-C(121) | 2.214(9)  |
| Rh(2)-C(122) | 2.226(10) |
| B(1)-F(4)    | 1.21(2)   |
| B(1)-F(3)    | 1.358(17) |
| B(1)-F(1)    | 1.374(16) |
| B(1)-F(2)    | 1.378(16) |
| B(2)-F(8)    | 1.313(17) |
| B(2)-F(7)    | 1.32(3)   |
| B(2)-F(5)    | 1.33(3)   |
| B(2)-F(6)    | 1.400(18) |
| B(2')-F(6')  | 1.325(16) |
| B(2')-F(8')  | 1.328(17) |
| B(2')-F(7')  | 1.330(17) |
| B(2')-F(5')  | 1.358(13) |
| N(1)-C(1)    | 1.345(11) |
| N(1)-C(15)   | 1.399(10) |
| N(1)-C(26)   | 1.472(11) |
| N(2)-C(1)    | 1.366(11) |
| N(2)-C(2)    | 1.402(10) |
| N(2)-C(27)   | 1.447(10) |
| N(3)-C(28)   | 1.354(10) |
| N(3)-C(42)   | 1.410(9)  |
| N(3)-C(53)   | 1.433(11) |
| N(4)-C(28)   | 1.373(10) |
| N(4)-C(29)   | 1.396(10) |
| N(4)-C(54)   | 1.456(11) |

|             |           |
|-------------|-----------|
| N(5)-C(55)  | 1.342(11) |
| N(5)-C(69)  | 1.397(10) |
| N(5)-C(88)  | 1.457(10) |
| N(6)-C(55)  | 1.349(11) |
| N(6)-C(56)  | 1.398(12) |
| N(6)-C(89)  | 1.446(11) |
| N(7)-C(90)  | 1.375(11) |
| N(7)-C(104) | 1.382(12) |
| N(7)-C(115) | 1.460(13) |
| N(8)-C(90)  | 1.341(11) |
| N(8)-C(91)  | 1.399(13) |
| N(8)-C(116) | 1.438(14) |
| C(2)-C(15)  | 1.371(11) |
| C(2)-C(3)   | 1.445(11) |
| C(3)-C(4)   | 1.407(12) |
| C(3)-C(16)  | 1.430(11) |
| C(4)-C(5)   | 1.401(12) |
| C(4)-H(4)   | 0.9500    |
| C(5)-C(6)   | 1.390(12) |
| C(5)-C(18)  | 1.501(12) |
| C(6)-C(7)   | 1.392(12) |
| C(6)-H(6)   | 0.9500    |
| C(7)-C(16)  | 1.400(11) |
| C(7)-C(8)   | 1.442(11) |
| C(8)-C(9)   | 1.326(12) |
| C(8)-H(8)   | 0.9500    |
| C(9)-C(10)  | 1.441(12) |
| C(9)-H(9)   | 0.9500    |
| C(10)-C(11) | 1.395(12) |
| C(10)-C(17) | 1.415(11) |
| C(11)-C(12) | 1.386(12) |
| C(11)-H(11) | 0.9500    |
| C(12)-C(13) | 1.396(11) |
| C(12)-C(22) | 1.533(12) |
| C(13)-C(14) | 1.373(11) |
| C(13)-H(13) | 0.9500    |
| C(14)-C(17) | 1.423(11) |
| C(14)-C(15) | 1.457(11) |

|              |           |
|--------------|-----------|
| C(16)-C(17)  | 1.435(11) |
| C(18)-C(20)  | 1.479(18) |
| C(18)-C(21)  | 1.532(16) |
| C(18)-C(19)  | 1.578(17) |
| C(19)-H(19A) | 0.9800    |
| C(19)-H(19B) | 0.9800    |
| C(19)-H(19C) | 0.9800    |
| C(20)-H(20A) | 0.9800    |
| C(20)-H(20B) | 0.9800    |
| C(20)-H(20C) | 0.9800    |
| C(21)-H(21A) | 0.9800    |
| C(21)-H(21B) | 0.9800    |
| C(21)-H(21C) | 0.9800    |
| C(22)-C(24)  | 1.507(15) |
| C(22)-C(23)  | 1.533(14) |
| C(22)-C(25)  | 1.536(15) |
| C(23)-H(23A) | 0.9800    |
| C(23)-H(23B) | 0.9800    |
| C(23)-H(23C) | 0.9800    |
| C(24)-H(24A) | 0.9800    |
| C(24)-H(24B) | 0.9800    |
| C(24)-H(24C) | 0.9800    |
| C(25)-H(25A) | 0.9800    |
| C(25)-H(25B) | 0.9800    |
| C(25)-H(25C) | 0.9800    |
| C(26)-H(26A) | 0.9800    |
| C(26)-H(26B) | 0.9800    |
| C(26)-H(26C) | 0.9800    |
| C(27)-H(27A) | 0.9800    |
| C(27)-H(27B) | 0.9800    |
| C(27)-H(27C) | 0.9800    |
| C(29)-C(42)  | 1.341(12) |
| C(29)-C(30)  | 1.458(11) |
| C(30)-C(31)  | 1.383(11) |
| C(30)-C(43)  | 1.415(12) |
| C(31)-C(32)  | 1.388(12) |
| C(31)-H(31)  | 0.9500    |
| C(32)-C(33)  | 1.343(13) |

|              |           |
|--------------|-----------|
| C(32)-C(45)  | 1.552(13) |
| C(33)-C(34)  | 1.393(13) |
| C(33)-H(33)  | 0.9500    |
| C(34)-C(43)  | 1.446(11) |
| C(34)-C(35)  | 1.449(12) |
| C(35)-C(36)  | 1.358(11) |
| C(35)-H(35)  | 0.9500    |
| C(36)-C(37)  | 1.436(12) |
| C(36)-H(36)  | 0.9500    |
| C(37)-C(38)  | 1.378(13) |
| C(37)-C(44)  | 1.437(12) |
| C(38)-C(39)  | 1.388(14) |
| C(38)-H(38)  | 0.9500    |
| C(39)-C(40)  | 1.418(13) |
| C(39)-C(49)  | 1.521(14) |
| C(40)-C(41)  | 1.392(12) |
| C(40)-H(40)  | 0.9500    |
| C(41)-C(44)  | 1.413(11) |
| C(41)-C(42)  | 1.442(11) |
| C(43)-C(44)  | 1.420(12) |
| C(45)-C(47)  | 1.528(15) |
| C(45)-C(46)  | 1.559(15) |
| C(45)-C(48)  | 1.561(16) |
| C(46)-H(46A) | 0.9800    |
| C(46)-H(46B) | 0.9800    |
| C(46)-H(46C) | 0.9800    |
| C(47)-H(47A) | 0.9800    |
| C(47)-H(47B) | 0.9800    |
| C(47)-H(47C) | 0.9800    |
| C(48)-H(48A) | 0.9800    |
| C(48)-H(48B) | 0.9800    |
| C(48)-H(48C) | 0.9800    |
| C(49)-C(51)  | 1.512(17) |
| C(49)-C(52)  | 1.523(17) |
| C(49)-C(50)  | 1.556(16) |
| C(50)-H(50A) | 0.9800    |
| C(50)-H(50B) | 0.9800    |
| C(50)-H(50C) | 0.9800    |

|              |           |
|--------------|-----------|
| C(51)-H(51A) | 0.9800    |
| C(51)-H(51B) | 0.9800    |
| C(51)-H(51C) | 0.9800    |
| C(52)-H(52A) | 0.9800    |
| C(52)-H(52B) | 0.9800    |
| C(52)-H(52C) | 0.9800    |
| C(53)-H(53A) | 0.9800    |
| C(53)-H(53B) | 0.9800    |
| C(53)-H(53C) | 0.9800    |
| C(54)-H(54A) | 0.9800    |
| C(54)-H(54B) | 0.9800    |
| C(54)-H(54C) | 0.9800    |
| C(56)-C(69)  | 1.375(12) |
| C(56)-C(57)  | 1.441(12) |
| C(57)-C(70)  | 1.405(14) |
| C(57)-C(58)  | 1.421(14) |
| C(58)-C(59)  | 1.394(15) |
| C(58)-H(58)  | 0.9500    |
| C(59)-C(60)  | 1.376(18) |
| C(59)-C(80)  | 1.515(16) |
| C(60)-C(61)  | 1.412(16) |
| C(60)-H(60)  | 0.9500    |
| C(61)-C(62)  | 1.404(16) |
| C(61)-C(70)  | 1.415(13) |
| C(62)-C(63)  | 1.355(13) |
| C(62)-H(62)  | 0.9500    |
| C(63)-C(64)  | 1.420(13) |
| C(63)-H(63)  | 0.9500    |
| C(64)-C(65)  | 1.412(13) |
| C(64)-C(71)  | 1.438(13) |
| C(65)-C(66)  | 1.405(13) |
| C(65)-H(65)  | 0.9500    |
| C(66)-C(67)  | 1.386(12) |
| C(66)-C(84)  | 1.491(13) |
| C(67)-C(68)  | 1.418(12) |
| C(67)-H(67)  | 0.9500    |
| C(68)-C(69)  | 1.419(11) |
| C(68)-C(71)  | 1.427(12) |

|              |           |
|--------------|-----------|
| C(70)-C(71)  | 1.419(13) |
| C(72)-C(73)  | 1.360(15) |
| C(72)-C(79)  | 1.536(16) |
| C(72)-H(72)  | 1.0000    |
| C(73)-C(74)  | 1.496(15) |
| C(73)-H(73)  | 1.0000    |
| C(74)-C(75)  | 1.504(16) |
| C(74)-H(74A) | 0.9900    |
| C(74)-H(74B) | 0.9900    |
| C(75)-C(76)  | 1.483(14) |
| C(75)-H(75A) | 0.9900    |
| C(75)-H(75B) | 0.9900    |
| C(76)-C(77)  | 1.367(16) |
| C(76)-H(76)  | 1.0000    |
| C(77)-C(78)  | 1.547(18) |
| C(77)-H(77)  | 1.0000    |
| C(78)-C(79)  | 1.487(19) |
| C(78)-H(78A) | 0.9900    |
| C(78)-H(78B) | 0.9900    |
| C(79)-H(79A) | 0.9900    |
| C(79)-H(79B) | 0.9900    |
| C(80)-C(82)  | 1.510(19) |
| C(80)-C(83)  | 1.518(15) |
| C(80)-C(81)  | 1.530(19) |
| C(81)-H(81A) | 0.9800    |
| C(81)-H(81B) | 0.9800    |
| C(81)-H(81C) | 0.9800    |
| C(82)-H(82A) | 0.9800    |
| C(82)-H(82B) | 0.9800    |
| C(82)-H(82C) | 0.9800    |
| C(83)-H(83A) | 0.9800    |
| C(83)-H(83B) | 0.9800    |
| C(83)-H(83C) | 0.9800    |
| C(84)-C(85)  | 1.514(15) |
| C(84)-C(87)  | 1.537(13) |
| C(84)-C(86)  | 1.552(13) |
| C(85)-H(85A) | 0.9800    |
| C(85)-H(85B) | 0.9800    |

|               |           |
|---------------|-----------|
| C(85)-H(85C)  | 0.9800    |
| C(86)-H(86A)  | 0.9800    |
| C(86)-H(86B)  | 0.9800    |
| C(86)-H(86C)  | 0.9800    |
| C(87)-H(87A)  | 0.9800    |
| C(87)-H(87B)  | 0.9800    |
| C(87)-H(87C)  | 0.9800    |
| C(88)-H(88A)  | 0.9800    |
| C(88)-H(88B)  | 0.9800    |
| C(88)-H(88C)  | 0.9800    |
| C(89)-H(89A)  | 0.9800    |
| C(89)-H(89B)  | 0.9800    |
| C(89)-H(89C)  | 0.9800    |
| C(91)-C(104)  | 1.359(16) |
| C(91)-C(92)   | 1.448(14) |
| C(92)-C(93)   | 1.391(14) |
| C(92)-C(105)  | 1.452(17) |
| C(93)-C(94)   | 1.431(14) |
| C(93)-H(93)   | 0.9500    |
| C(94)-C(95)   | 1.36(3)   |
| C(94)-C(107)  | 1.53(3)   |
| C(95)-C(96)   | 1.34(2)   |
| C(95)-H(95)   | 0.9500    |
| C(96)-C(105)  | 1.462(16) |
| C(96)-C(97)   | 1.46(2)   |
| C(97)-C(98)   | 1.337(19) |
| C(97)-H(97)   | 0.9500    |
| C(98)-C(99)   | 1.415(17) |
| C(98)-H(98)   | 0.9500    |
| C(99)-C(100)  | 1.378(14) |
| C(99)-C(106)  | 1.416(13) |
| C(100)-C(101) | 1.37(2)   |
| C(100)-H(100) | 0.9500    |
| C(101)-C(102) | 1.390(16) |
| C(101)-C(111) | 1.46(2)   |
| C(102)-C(103) | 1.406(18) |
| C(102)-H(102) | 0.9500    |
| C(103)-C(106) | 1.391(12) |



|               |           |
|---------------|-----------|
| C(103)-C(104) | 1.456(16) |
| C(105)-C(106) | 1.415(14) |
| C(107)-C(109) | 1.41(3)   |
| C(107)-C(108) | 1.512(18) |
| C(107)-C(110) | 1.60(4)   |
| C(108)-H(10A) | 0.9800    |
| C(108)-H(10B) | 0.9800    |
| C(108)-H(10C) | 0.9800    |
| C(109)-H(10D) | 0.9800    |
| C(109)-H(10E) | 0.9800    |
| C(109)-H(10F) | 0.9800    |
| C(110)-H(11A) | 0.9800    |
| C(110)-H(11B) | 0.9800    |
| C(110)-H(11C) | 0.9800    |
| C(111)-C(114) | 1.524(16) |
| C(111)-C(112) | 1.551(13) |
| C(111)-C(113) | 1.571(17) |
| C(112)-H(11D) | 0.9800    |
| C(112)-H(11E) | 0.9800    |
| C(112)-H(11F) | 0.9800    |
| C(113)-H(11G) | 0.9800    |
| C(113)-H(11H) | 0.9800    |
| C(113)-H(11I) | 0.9800    |
| C(114)-H(11J) | 0.9800    |
| C(114)-H(11K) | 0.9800    |
| C(114)-H(11L) | 0.9800    |
| C(115)-H(11M) | 0.9800    |
| C(115)-H(11N) | 0.9800    |
| C(115)-H(11O) | 0.9800    |
| C(116)-H(11P) | 0.9800    |
| C(116)-H(11Q) | 0.9800    |
| C(116)-H(11R) | 0.9800    |
| C(117)-C(118) | 1.373(15) |
| C(117)-C(124) | 1.490(17) |
| C(117)-H(117) | 1.0000    |
| C(118)-C(119) | 1.534(15) |
| C(118)-H(118) | 1.0000    |
| C(119)-C(120) | 1.515(15) |

|                   |           |
|-------------------|-----------|
| C(119)-H(11S)     | 0.9900    |
| C(119)-H(11T)     | 0.9900    |
| C(120)-C(121)     | 1.507(14) |
| C(120)-H(12A)     | 0.9900    |
| C(120)-H(12B)     | 0.9900    |
| C(121)-C(122)     | 1.371(15) |
| C(121)-H(121)     | 1.0000    |
| C(122)-C(123)     | 1.503(15) |
| C(122)-H(122)     | 1.0000    |
| C(123)-C(124)     | 1.550(17) |
| C(123)-H(12C)     | 0.9900    |
| C(123)-H(12D)     | 0.9900    |
| C(124)-H(12E)     | 0.9900    |
| C(124)-H(12F)     | 0.9900    |
| C(125)-Cl(1)      | 1.683(16) |
| C(125)-Cl(3)      | 1.72(2)   |
| C(125)-Cl(2)      | 1.770(17) |
| C(125)-H(125)     | 1.0000    |
| C(126)-Cl(5)      | 1.698(18) |
| C(126)-Cl(4)      | 1.718(18) |
| C(126)-Cl(6)      | 1.795(17) |
| C(126)-H(126)     | 1.0000    |
| C(127)-Cl(7)      | 1.66(2)   |
| C(127)-Cl(9)      | 1.72(3)   |
| C(127)-Cl(8)      | 1.73(2)   |
| C(127)-H(127)     | 1.0000    |
|                   |           |
| C(28)-Rh(1)-C(1)  | 91.9(3)   |
| C(28)-Rh(1)-C(77) | 154.4(4)  |
| C(1)-Rh(1)-C(77)  | 91.6(4)   |
| C(28)-Rh(1)-C(73) | 92.5(3)   |
| C(1)-Rh(1)-C(73)  | 153.7(4)  |
| C(77)-Rh(1)-C(73) | 95.5(4)   |
| C(28)-Rh(1)-C(72) | 90.4(3)   |
| C(1)-Rh(1)-C(72)  | 169.6(4)  |
| C(77)-Rh(1)-C(72) | 82.0(4)   |
| C(73)-Rh(1)-C(72) | 36.1(4)   |
| C(28)-Rh(1)-C(76) | 168.9(4)  |

|                     |           |
|---------------------|-----------|
| C(1)-Rh(1)-C(76)    | 90.6(4)   |
| C(77)-Rh(1)-C(76)   | 36.2(4)   |
| C(73)-Rh(1)-C(76)   | 80.5(4)   |
| C(72)-Rh(1)-C(76)   | 89.0(4)   |
| C(90)-Rh(2)-C(55)   | 91.1(3)   |
| C(90)-Rh(2)-C(117)  | 161.0(4)  |
| C(55)-Rh(2)-C(117)  | 89.1(4)   |
| C(90)-Rh(2)-C(118)  | 162.2(4)  |
| C(55)-Rh(2)-C(118)  | 92.7(4)   |
| C(117)-Rh(2)-C(118) | 36.6(4)   |
| C(90)-Rh(2)-C(121)  | 89.6(3)   |
| C(55)-Rh(2)-C(121)  | 162.1(4)  |
| C(117)-Rh(2)-C(121) | 96.0(4)   |
| C(118)-Rh(2)-C(121) | 81.6(4)   |
| C(90)-Rh(2)-C(122)  | 93.6(4)   |
| C(55)-Rh(2)-C(122)  | 161.5(4)  |
| C(117)-Rh(2)-C(122) | 80.7(4)   |
| C(118)-Rh(2)-C(122) | 88.3(4)   |
| C(121)-Rh(2)-C(122) | 36.0(4)   |
| F(4)-B(1)-F(3)      | 116(2)    |
| F(4)-B(1)-F(1)      | 111.0(17) |
| F(3)-B(1)-F(1)      | 109.3(19) |
| F(4)-B(1)-F(2)      | 119.8(19) |
| F(3)-B(1)-F(2)      | 96.1(16)  |
| F(1)-B(1)-F(2)      | 102.6(17) |
| F(8)-B(2)-F(7)      | 115(3)    |
| F(8)-B(2)-F(5)      | 113(3)    |
| F(7)-B(2)-F(5)      | 112(3)    |
| F(8)-B(2)-F(6)      | 108(2)    |
| F(7)-B(2)-F(6)      | 108(2)    |
| F(5)-B(2)-F(6)      | 101(3)    |
| F(6')-B(2')-F(8')   | 110(3)    |
| F(6')-B(2')-F(7')   | 122(3)    |
| F(8')-B(2')-F(7')   | 107(3)    |
| F(6')-B(2')-F(5')   | 109(3)    |
| F(8')-B(2')-F(5')   | 100(3)    |
| F(7')-B(2')-F(5')   | 106(2)    |
| C(1)-N(1)-C(15)     | 110.7(7)  |

|                    |          |
|--------------------|----------|
| C(1)-N(1)-C(26)    | 123.1(7) |
| C(15)-N(1)-C(26)   | 126.2(7) |
| C(1)-N(2)-C(2)     | 110.0(7) |
| C(1)-N(2)-C(27)    | 121.5(7) |
| C(2)-N(2)-C(27)    | 127.5(7) |
| C(28)-N(3)-C(42)   | 109.4(7) |
| C(28)-N(3)-C(53)   | 121.8(7) |
| C(42)-N(3)-C(53)   | 128.8(7) |
| C(28)-N(4)-C(29)   | 108.5(7) |
| C(28)-N(4)-C(54)   | 123.4(7) |
| C(29)-N(4)-C(54)   | 128.0(7) |
| C(55)-N(5)-C(69)   | 110.7(7) |
| C(55)-N(5)-C(88)   | 123.3(7) |
| C(69)-N(5)-C(88)   | 126.0(7) |
| C(55)-N(6)-C(56)   | 110.0(7) |
| C(55)-N(6)-C(89)   | 122.2(8) |
| C(56)-N(6)-C(89)   | 127.9(8) |
| C(90)-N(7)-C(104)  | 108.4(9) |
| C(90)-N(7)-C(115)  | 123.5(8) |
| C(104)-N(7)-C(115) | 128.1(9) |
| C(90)-N(8)-C(91)   | 109.6(9) |
| C(90)-N(8)-C(116)  | 123.0(8) |
| C(91)-N(8)-C(116)  | 127.4(9) |
| N(1)-C(1)-N(2)     | 106.2(7) |
| N(1)-C(1)-Rh(1)    | 127.5(6) |
| N(2)-C(1)-Rh(1)    | 126.3(6) |
| C(15)-C(2)-N(2)    | 106.4(7) |
| C(15)-C(2)-C(3)    | 123.6(7) |
| N(2)-C(2)-C(3)     | 130.0(7) |
| C(4)-C(3)-C(16)    | 119.3(8) |
| C(4)-C(3)-C(2)     | 125.8(7) |
| C(16)-C(3)-C(2)    | 114.8(7) |
| C(5)-C(4)-C(3)     | 122.6(8) |
| C(5)-C(4)-H(4)     | 118.7    |
| C(3)-C(4)-H(4)     | 118.7    |
| C(6)-C(5)-C(4)     | 116.8(8) |
| C(6)-C(5)-C(18)    | 120.7(8) |
| C(4)-C(5)-C(18)    | 122.4(8) |

|                   |           |
|-------------------|-----------|
| C(5)-C(6)-C(7)    | 122.3(8)  |
| C(5)-C(6)-H(6)    | 118.8     |
| C(7)-C(6)-H(6)    | 118.8     |
| C(6)-C(7)-C(16)   | 121.3(8)  |
| C(6)-C(7)-C(8)    | 120.3(8)  |
| C(16)-C(7)-C(8)   | 118.4(8)  |
| C(9)-C(8)-C(7)    | 121.4(8)  |
| C(9)-C(8)-H(8)    | 119.3     |
| C(7)-C(8)-H(8)    | 119.3     |
| C(8)-C(9)-C(10)   | 121.3(8)  |
| C(8)-C(9)-H(9)    | 119.4     |
| C(10)-C(9)-H(9)   | 119.4     |
| C(11)-C(10)-C(17) | 118.5(8)  |
| C(11)-C(10)-C(9)  | 121.8(8)  |
| C(17)-C(10)-C(9)  | 119.7(8)  |
| C(12)-C(11)-C(10) | 123.5(8)  |
| C(12)-C(11)-H(11) | 118.2     |
| C(10)-C(11)-H(11) | 118.2     |
| C(11)-C(12)-C(13) | 116.8(8)  |
| C(11)-C(12)-C(22) | 123.5(8)  |
| C(13)-C(12)-C(22) | 119.7(8)  |
| C(14)-C(13)-C(12) | 122.5(8)  |
| C(14)-C(13)-H(13) | 118.7     |
| C(12)-C(13)-H(13) | 118.7     |
| C(13)-C(14)-C(17) | 120.1(7)  |
| C(13)-C(14)-C(15) | 126.0(8)  |
| C(17)-C(14)-C(15) | 113.9(7)  |
| C(2)-C(15)-N(1)   | 106.7(7)  |
| C(2)-C(15)-C(14)  | 122.8(7)  |
| N(1)-C(15)-C(14)  | 130.5(7)  |
| C(7)-C(16)-C(3)   | 117.6(8)  |
| C(7)-C(16)-C(17)  | 121.2(7)  |
| C(3)-C(16)-C(17)  | 121.1(7)  |
| C(10)-C(17)-C(14) | 118.5(7)  |
| C(10)-C(17)-C(16) | 118.0(7)  |
| C(14)-C(17)-C(16) | 123.6(7)  |
| C(20)-C(18)-C(5)  | 112.7(9)  |
| C(20)-C(18)-C(21) | 109.4(12) |

|                     |           |
|---------------------|-----------|
| C(5)-C(18)-C(21)    | 115.2(9)  |
| C(20)-C(18)-C(19)   | 105.6(12) |
| C(5)-C(18)-C(19)    | 109.6(9)  |
| C(21)-C(18)-C(19)   | 103.6(11) |
| C(18)-C(19)-H(19A)  | 109.5     |
| C(18)-C(19)-H(19B)  | 109.5     |
| H(19A)-C(19)-H(19B) | 109.5     |
| C(18)-C(19)-H(19C)  | 109.5     |
| H(19A)-C(19)-H(19C) | 109.5     |
| H(19B)-C(19)-H(19C) | 109.5     |
| C(18)-C(20)-H(20A)  | 109.5     |
| C(18)-C(20)-H(20B)  | 109.5     |
| H(20A)-C(20)-H(20B) | 109.5     |
| C(18)-C(20)-H(20C)  | 109.5     |
| H(20A)-C(20)-H(20C) | 109.5     |
| H(20B)-C(20)-H(20C) | 109.5     |
| C(18)-C(21)-H(21A)  | 109.5     |
| C(18)-C(21)-H(21B)  | 109.5     |
| H(21A)-C(21)-H(21B) | 109.5     |
| C(18)-C(21)-H(21C)  | 109.5     |
| H(21A)-C(21)-H(21C) | 109.5     |
| H(21B)-C(21)-H(21C) | 109.5     |
| C(24)-C(22)-C(12)   | 110.8(9)  |
| C(24)-C(22)-C(23)   | 108.3(9)  |
| C(12)-C(22)-C(23)   | 112.4(8)  |
| C(24)-C(22)-C(25)   | 108.1(10) |
| C(12)-C(22)-C(25)   | 108.7(8)  |
| C(23)-C(22)-C(25)   | 108.5(10) |
| C(22)-C(23)-H(23A)  | 109.5     |
| C(22)-C(23)-H(23B)  | 109.5     |
| H(23A)-C(23)-H(23B) | 109.5     |
| C(22)-C(23)-H(23C)  | 109.5     |
| H(23A)-C(23)-H(23C) | 109.5     |
| H(23B)-C(23)-H(23C) | 109.5     |
| C(22)-C(24)-H(24A)  | 109.5     |
| C(22)-C(24)-H(24B)  | 109.5     |
| H(24A)-C(24)-H(24B) | 109.5     |
| C(22)-C(24)-H(24C)  | 109.5     |

|                     |          |
|---------------------|----------|
| H(24A)-C(24)-H(24C) | 109.5    |
| H(24B)-C(24)-H(24C) | 109.5    |
| C(22)-C(25)-H(25A)  | 109.5    |
| C(22)-C(25)-H(25B)  | 109.5    |
| H(25A)-C(25)-H(25B) | 109.5    |
| C(22)-C(25)-H(25C)  | 109.5    |
| H(25A)-C(25)-H(25C) | 109.5    |
| H(25B)-C(25)-H(25C) | 109.5    |
| N(1)-C(26)-H(26A)   | 109.5    |
| N(1)-C(26)-H(26B)   | 109.5    |
| H(26A)-C(26)-H(26B) | 109.5    |
| N(1)-C(26)-H(26C)   | 109.5    |
| H(26A)-C(26)-H(26C) | 109.5    |
| H(26B)-C(26)-H(26C) | 109.5    |
| N(2)-C(27)-H(27A)   | 109.5    |
| N(2)-C(27)-H(27B)   | 109.5    |
| H(27A)-C(27)-H(27B) | 109.5    |
| N(2)-C(27)-H(27C)   | 109.5    |
| H(27A)-C(27)-H(27C) | 109.5    |
| H(27B)-C(27)-H(27C) | 109.5    |
| N(3)-C(28)-N(4)     | 106.8(7) |
| N(3)-C(28)-Rh(1)    | 128.7(6) |
| N(4)-C(28)-Rh(1)    | 124.4(6) |
| C(42)-C(29)-N(4)    | 108.4(7) |
| C(42)-C(29)-C(30)   | 122.6(8) |
| N(4)-C(29)-C(30)    | 128.9(8) |
| C(31)-C(30)-C(43)   | 119.6(8) |
| C(31)-C(30)-C(29)   | 125.6(8) |
| C(43)-C(30)-C(29)   | 114.7(7) |
| C(30)-C(31)-C(32)   | 122.0(8) |
| C(30)-C(31)-H(31)   | 119.0    |
| C(32)-C(31)-H(31)   | 119.0    |
| C(33)-C(32)-C(31)   | 120.4(9) |
| C(33)-C(32)-C(45)   | 119.7(8) |
| C(31)-C(32)-C(45)   | 119.8(9) |
| C(32)-C(33)-C(34)   | 120.3(8) |
| C(32)-C(33)-H(33)   | 119.9    |
| C(34)-C(33)-H(33)   | 119.9    |

|                   |           |
|-------------------|-----------|
| C(33)-C(34)-C(43) | 121.1(8)  |
| C(33)-C(34)-C(35) | 122.1(8)  |
| C(43)-C(34)-C(35) | 116.8(8)  |
| C(36)-C(35)-C(34) | 122.4(8)  |
| C(36)-C(35)-H(35) | 118.8     |
| C(34)-C(35)-H(35) | 118.8     |
| C(35)-C(36)-C(37) | 121.2(8)  |
| C(35)-C(36)-H(36) | 119.4     |
| C(37)-C(36)-H(36) | 119.4     |
| C(38)-C(37)-C(36) | 121.3(9)  |
| C(38)-C(37)-C(44) | 119.9(8)  |
| C(36)-C(37)-C(44) | 118.8(8)  |
| C(37)-C(38)-C(39) | 122.9(9)  |
| C(37)-C(38)-H(38) | 118.5     |
| C(39)-C(38)-H(38) | 118.5     |
| C(38)-C(39)-C(40) | 116.8(9)  |
| C(38)-C(39)-C(49) | 124.1(9)  |
| C(40)-C(39)-C(49) | 119.1(9)  |
| C(41)-C(40)-C(39) | 122.6(8)  |
| C(41)-C(40)-H(40) | 118.7     |
| C(39)-C(40)-H(40) | 118.7     |
| C(40)-C(41)-C(44) | 119.4(8)  |
| C(40)-C(41)-C(42) | 125.6(8)  |
| C(44)-C(41)-C(42) | 115.0(7)  |
| C(29)-C(42)-N(3)  | 106.8(7)  |
| C(29)-C(42)-C(41) | 123.5(7)  |
| N(3)-C(42)-C(41)  | 129.7(8)  |
| C(30)-C(43)-C(44) | 122.2(7)  |
| C(30)-C(43)-C(34) | 116.7(8)  |
| C(44)-C(43)-C(34) | 121.0(8)  |
| C(41)-C(44)-C(43) | 121.9(7)  |
| C(41)-C(44)-C(37) | 118.3(8)  |
| C(43)-C(44)-C(37) | 119.7(8)  |
| C(47)-C(45)-C(32) | 109.0(8)  |
| C(47)-C(45)-C(46) | 111.7(10) |
| C(32)-C(45)-C(46) | 110.3(9)  |
| C(47)-C(45)-C(48) | 106.3(10) |
| C(32)-C(45)-C(48) | 114.2(8)  |



|                     |           |
|---------------------|-----------|
| C(46)-C(45)-C(48)   | 105.3(9)  |
| C(45)-C(46)-H(46A)  | 109.5     |
| C(45)-C(46)-H(46B)  | 109.5     |
| H(46A)-C(46)-H(46B) | 109.5     |
| C(45)-C(46)-H(46C)  | 109.5     |
| H(46A)-C(46)-H(46C) | 109.5     |
| H(46B)-C(46)-H(46C) | 109.5     |
| C(45)-C(47)-H(47A)  | 109.5     |
| C(45)-C(47)-H(47B)  | 109.5     |
| H(47A)-C(47)-H(47B) | 109.5     |
| C(45)-C(47)-H(47C)  | 109.5     |
| H(47A)-C(47)-H(47C) | 109.5     |
| H(47B)-C(47)-H(47C) | 109.5     |
| C(45)-C(48)-H(48A)  | 109.5     |
| C(45)-C(48)-H(48B)  | 109.5     |
| H(48A)-C(48)-H(48B) | 109.5     |
| C(45)-C(48)-H(48C)  | 109.5     |
| H(48A)-C(48)-H(48C) | 109.5     |
| H(48B)-C(48)-H(48C) | 109.5     |
| C(51)-C(49)-C(39)   | 110.3(10) |
| C(51)-C(49)-C(52)   | 108.8(13) |
| C(39)-C(49)-C(52)   | 112.8(10) |
| C(51)-C(49)-C(50)   | 104.6(10) |
| C(39)-C(49)-C(50)   | 113.3(9)  |
| C(52)-C(49)-C(50)   | 106.7(12) |
| C(49)-C(50)-H(50A)  | 109.5     |
| C(49)-C(50)-H(50B)  | 109.5     |
| H(50A)-C(50)-H(50B) | 109.5     |
| C(49)-C(50)-H(50C)  | 109.5     |
| H(50A)-C(50)-H(50C) | 109.5     |
| H(50B)-C(50)-H(50C) | 109.5     |
| C(49)-C(51)-H(51A)  | 109.5     |
| C(49)-C(51)-H(51B)  | 109.5     |
| H(51A)-C(51)-H(51B) | 109.5     |
| C(49)-C(51)-H(51C)  | 109.5     |
| H(51A)-C(51)-H(51C) | 109.5     |
| H(51B)-C(51)-H(51C) | 109.5     |
| C(49)-C(52)-H(52A)  | 109.5     |

|                     |           |
|---------------------|-----------|
| C(49)-C(52)-H(52B)  | 109.5     |
| H(52A)-C(52)-H(52B) | 109.5     |
| C(49)-C(52)-H(52C)  | 109.5     |
| H(52A)-C(52)-H(52C) | 109.5     |
| H(52B)-C(52)-H(52C) | 109.5     |
| N(3)-C(53)-H(53A)   | 109.5     |
| N(3)-C(53)-H(53B)   | 109.5     |
| H(53A)-C(53)-H(53B) | 109.5     |
| N(3)-C(53)-H(53C)   | 109.5     |
| H(53A)-C(53)-H(53C) | 109.5     |
| H(53B)-C(53)-H(53C) | 109.5     |
| N(4)-C(54)-H(54A)   | 109.5     |
| N(4)-C(54)-H(54B)   | 109.5     |
| H(54A)-C(54)-H(54B) | 109.5     |
| N(4)-C(54)-H(54C)   | 109.5     |
| H(54A)-C(54)-H(54C) | 109.5     |
| H(54B)-C(54)-H(54C) | 109.5     |
| N(5)-C(55)-N(6)     | 106.7(8)  |
| N(5)-C(55)-Rh(2)    | 126.5(6)  |
| N(6)-C(55)-Rh(2)    | 126.8(6)  |
| C(69)-C(56)-N(6)    | 106.7(7)  |
| C(69)-C(56)-C(57)   | 122.2(9)  |
| N(6)-C(56)-C(57)    | 131.1(8)  |
| C(70)-C(57)-C(58)   | 118.9(9)  |
| C(70)-C(57)-C(56)   | 116.5(8)  |
| C(58)-C(57)-C(56)   | 124.6(10) |
| C(59)-C(58)-C(57)   | 122.2(12) |
| C(59)-C(58)-H(58)   | 118.9     |
| C(57)-C(58)-H(58)   | 118.9     |
| C(60)-C(59)-C(58)   | 117.5(11) |
| C(60)-C(59)-C(80)   | 122.3(11) |
| C(58)-C(59)-C(80)   | 120.3(13) |
| C(59)-C(60)-C(61)   | 123.1(11) |
| C(59)-C(60)-H(60)   | 118.4     |
| C(61)-C(60)-H(60)   | 118.4     |
| C(62)-C(61)-C(60)   | 121.3(10) |
| C(62)-C(61)-C(70)   | 120.2(10) |
| C(60)-C(61)-C(70)   | 118.6(11) |

|                   |           |
|-------------------|-----------|
| C(63)-C(62)-C(61) | 120.9(10) |
| C(63)-C(62)-H(62) | 119.5     |
| C(61)-C(62)-H(62) | 119.5     |
| C(62)-C(63)-C(64) | 122.0(10) |
| C(62)-C(63)-H(63) | 119.0     |
| C(64)-C(63)-H(63) | 119.0     |
| C(65)-C(64)-C(63) | 121.9(9)  |
| C(65)-C(64)-C(71) | 120.4(8)  |
| C(63)-C(64)-C(71) | 117.7(10) |
| C(66)-C(65)-C(64) | 121.8(8)  |
| C(66)-C(65)-H(65) | 119.1     |
| C(64)-C(65)-H(65) | 119.1     |
| C(67)-C(66)-C(65) | 116.9(9)  |
| C(67)-C(66)-C(84) | 123.3(9)  |
| C(65)-C(66)-C(84) | 119.8(9)  |
| C(66)-C(67)-C(68) | 124.5(8)  |
| C(66)-C(67)-H(67) | 117.7     |
| C(68)-C(67)-H(67) | 117.7     |
| C(67)-C(68)-C(69) | 125.3(8)  |
| C(67)-C(68)-C(71) | 118.2(8)  |
| C(69)-C(68)-C(71) | 116.4(8)  |
| C(56)-C(69)-N(5)  | 105.9(7)  |
| C(56)-C(69)-C(68) | 122.1(8)  |
| N(5)-C(69)-C(68)  | 132.0(8)  |
| C(57)-C(70)-C(61) | 119.7(9)  |
| C(57)-C(70)-C(71) | 121.3(8)  |
| C(61)-C(70)-C(71) | 119.0(10) |
| C(70)-C(71)-C(68) | 121.6(8)  |
| C(70)-C(71)-C(64) | 120.3(8)  |
| C(68)-C(71)-C(64) | 118.1(8)  |
| C(73)-C(72)-C(79) | 125.1(11) |
| C(73)-C(72)-Rh(1) | 71.4(6)   |
| C(79)-C(72)-Rh(1) | 109.7(7)  |
| C(73)-C(72)-H(72) | 114.2     |
| C(79)-C(72)-H(72) | 114.2     |
| Rh(1)-C(72)-H(72) | 114.2     |
| C(72)-C(73)-C(74) | 127.0(10) |
| C(72)-C(73)-Rh(1) | 72.5(5)   |

|                     |           |
|---------------------|-----------|
| C(74)-C(73)-Rh(1)   | 108.8(6)  |
| C(72)-C(73)-H(73)   | 113.5     |
| C(74)-C(73)-H(73)   | 113.5     |
| Rh(1)-C(73)-H(73)   | 113.5     |
| C(73)-C(74)-C(75)   | 113.9(10) |
| C(73)-C(74)-H(74A)  | 108.8     |
| C(75)-C(74)-H(74A)  | 108.8     |
| C(73)-C(74)-H(74B)  | 108.8     |
| C(75)-C(74)-H(74B)  | 108.8     |
| H(74A)-C(74)-H(74B) | 107.7     |
| C(76)-C(75)-C(74)   | 115.5(9)  |
| C(76)-C(75)-H(75A)  | 108.4     |
| C(74)-C(75)-H(75A)  | 108.4     |
| C(76)-C(75)-H(75B)  | 108.4     |
| C(74)-C(75)-H(75B)  | 108.4     |
| H(75A)-C(75)-H(75B) | 107.5     |
| C(77)-C(76)-C(75)   | 123.8(12) |
| C(77)-C(76)-Rh(1)   | 70.8(6)   |
| C(75)-C(76)-Rh(1)   | 110.9(7)  |
| C(77)-C(76)-H(76)   | 114.4     |
| C(75)-C(76)-H(76)   | 114.4     |
| Rh(1)-C(76)-H(76)   | 114.4     |
| C(76)-C(77)-C(78)   | 128.1(12) |
| C(76)-C(77)-Rh(1)   | 73.0(6)   |
| C(78)-C(77)-Rh(1)   | 106.3(7)  |
| C(76)-C(77)-H(77)   | 113.5     |
| C(78)-C(77)-H(77)   | 113.5     |
| Rh(1)-C(77)-H(77)   | 113.5     |
| C(79)-C(78)-C(77)   | 113.8(12) |
| C(79)-C(78)-H(78A)  | 108.8     |
| C(77)-C(78)-H(78A)  | 108.8     |
| C(79)-C(78)-H(78B)  | 108.8     |
| C(77)-C(78)-H(78B)  | 108.8     |
| H(78A)-C(78)-H(78B) | 107.7     |
| C(78)-C(79)-C(72)   | 115.3(9)  |
| C(78)-C(79)-H(79A)  | 108.5     |
| C(72)-C(79)-H(79A)  | 108.4     |
| C(78)-C(79)-H(79B)  | 108.5     |

|                     |           |
|---------------------|-----------|
| C(72)-C(79)-H(79B)  | 108.5     |
| H(79A)-C(79)-H(79B) | 107.5     |
| C(82)-C(80)-C(59)   | 111.8(10) |
| C(82)-C(80)-C(83)   | 107.1(12) |
| C(59)-C(80)-C(83)   | 112.3(13) |
| C(82)-C(80)-C(81)   | 106.9(14) |
| C(59)-C(80)-C(81)   | 110.5(10) |
| C(83)-C(80)-C(81)   | 108.0(11) |
| C(80)-C(81)-H(81A)  | 109.5     |
| C(80)-C(81)-H(81B)  | 109.5     |
| H(81A)-C(81)-H(81B) | 109.5     |
| C(80)-C(81)-H(81C)  | 109.5     |
| H(81A)-C(81)-H(81C) | 109.5     |
| H(81B)-C(81)-H(81C) | 109.5     |
| C(80)-C(82)-H(82A)  | 109.5     |
| C(80)-C(82)-H(82B)  | 109.5     |
| H(82A)-C(82)-H(82B) | 109.5     |
| C(80)-C(82)-H(82C)  | 109.5     |
| H(82A)-C(82)-H(82C) | 109.5     |
| H(82B)-C(82)-H(82C) | 109.5     |
| C(80)-C(83)-H(83A)  | 109.5     |
| C(80)-C(83)-H(83B)  | 109.5     |
| H(83A)-C(83)-H(83B) | 109.5     |
| C(80)-C(83)-H(83C)  | 109.5     |
| H(83A)-C(83)-H(83C) | 109.5     |
| H(83B)-C(83)-H(83C) | 109.5     |
| C(66)-C(84)-C(85)   | 113.0(8)  |
| C(66)-C(84)-C(87)   | 109.5(8)  |
| C(85)-C(84)-C(87)   | 107.7(9)  |
| C(66)-C(84)-C(86)   | 109.0(8)  |
| C(85)-C(84)-C(86)   | 108.2(9)  |
| C(87)-C(84)-C(86)   | 109.5(9)  |
| C(84)-C(85)-H(85A)  | 109.5     |
| C(84)-C(85)-H(85B)  | 109.5     |
| H(85A)-C(85)-H(85B) | 109.5     |
| C(84)-C(85)-H(85C)  | 109.5     |
| H(85A)-C(85)-H(85C) | 109.5     |
| H(85B)-C(85)-H(85C) | 109.5     |

|                     |           |
|---------------------|-----------|
| C(84)-C(86)-H(86A)  | 109.5     |
| C(84)-C(86)-H(86B)  | 109.5     |
| H(86A)-C(86)-H(86B) | 109.5     |
| C(84)-C(86)-H(86C)  | 109.5     |
| H(86A)-C(86)-H(86C) | 109.5     |
| H(86B)-C(86)-H(86C) | 109.5     |
| C(84)-C(87)-H(87A)  | 109.5     |
| C(84)-C(87)-H(87B)  | 109.5     |
| H(87A)-C(87)-H(87B) | 109.5     |
| C(84)-C(87)-H(87C)  | 109.5     |
| H(87A)-C(87)-H(87C) | 109.5     |
| H(87B)-C(87)-H(87C) | 109.5     |
| N(5)-C(88)-H(88A)   | 109.5     |
| N(5)-C(88)-H(88B)   | 109.5     |
| H(88A)-C(88)-H(88B) | 109.5     |
| N(5)-C(88)-H(88C)   | 109.5     |
| H(88A)-C(88)-H(88C) | 109.5     |
| H(88B)-C(88)-H(88C) | 109.5     |
| N(6)-C(89)-H(89A)   | 109.5     |
| N(6)-C(89)-H(89B)   | 109.5     |
| H(89A)-C(89)-H(89B) | 109.5     |
| N(6)-C(89)-H(89C)   | 109.5     |
| H(89A)-C(89)-H(89C) | 109.5     |
| H(89B)-C(89)-H(89C) | 109.5     |
| N(8)-C(90)-N(7)     | 107.3(8)  |
| N(8)-C(90)-Rh(2)    | 127.6(7)  |
| N(7)-C(90)-Rh(2)    | 125.1(6)  |
| C(104)-C(91)-N(8)   | 106.5(8)  |
| C(104)-C(91)-C(92)  | 122.8(11) |
| N(8)-C(91)-C(92)    | 130.7(12) |
| C(93)-C(92)-C(91)   | 123.5(12) |
| C(93)-C(92)-C(105)  | 122.3(11) |
| C(91)-C(92)-C(105)  | 114.2(12) |
| C(92)-C(93)-C(94)   | 119.5(15) |
| C(92)-C(93)-H(93)   | 120.2     |
| C(94)-C(93)-H(93)   | 120.2     |
| C(95)-C(94)-C(93)   | 118.7(17) |
| C(95)-C(94)-C(107)  | 125.5(17) |

|                      |           |
|----------------------|-----------|
| C(93)-C(94)-C(107)   | 115.5(19) |
| C(96)-C(95)-C(94)    | 123.4(14) |
| C(96)-C(95)-H(95)    | 118.3     |
| C(94)-C(95)-H(95)    | 118.3     |
| C(95)-C(96)-C(105)   | 122.1(15) |
| C(95)-C(96)-C(97)    | 124.8(14) |
| C(105)-C(96)-C(97)   | 113.0(15) |
| C(98)-C(97)-C(96)    | 123.4(12) |
| C(98)-C(97)-H(97)    | 118.3     |
| C(96)-C(97)-H(97)    | 118.3     |
| C(97)-C(98)-C(99)    | 121.8(13) |
| C(97)-C(98)-H(98)    | 119.1     |
| C(99)-C(98)-H(98)    | 119.1     |
| C(100)-C(99)-C(98)   | 123.1(12) |
| C(100)-C(99)-C(106)  | 116.6(12) |
| C(98)-C(99)-C(106)   | 120.2(13) |
| C(101)-C(100)-C(99)  | 124.8(12) |
| C(101)-C(100)-H(100) | 117.6     |
| C(99)-C(100)-H(100)  | 117.6     |
| C(100)-C(101)-C(102) | 118.2(16) |
| C(100)-C(101)-C(111) | 121.7(12) |
| C(102)-C(101)-C(111) | 120.1(15) |
| C(101)-C(102)-C(103) | 119.9(14) |
| C(101)-C(102)-H(102) | 120.0     |
| C(103)-C(102)-H(102) | 120.0     |
| C(106)-C(103)-C(102) | 120.0(12) |
| C(106)-C(103)-C(104) | 116.2(12) |
| C(102)-C(103)-C(104) | 123.7(10) |
| C(91)-C(104)-N(7)    | 108.1(9)  |
| C(91)-C(104)-C(103)  | 122.5(10) |
| N(7)-C(104)-C(103)   | 129.4(12) |
| C(106)-C(105)-C(92)  | 122.2(10) |
| C(106)-C(105)-C(96)  | 123.9(13) |
| C(92)-C(105)-C(96)   | 113.9(13) |
| C(103)-C(106)-C(105) | 122.0(11) |
| C(103)-C(106)-C(99)  | 120.4(13) |
| C(105)-C(106)-C(99)  | 117.6(11) |
| C(109)-C(107)-C(108) | 108(2)    |

|                      |           |
|----------------------|-----------|
| C(109)-C(107)-C(94)  | 115(3)    |
| C(108)-C(107)-C(94)  | 117(2)    |
| C(109)-C(107)-C(110) | 98(3)     |
| C(108)-C(107)-C(110) | 105(3)    |
| C(94)-C(107)-C(110)  | 112(2)    |
| C(107)-C(108)-H(10A) | 109.5     |
| C(107)-C(108)-H(10B) | 109.5     |
| H(10A)-C(108)-H(10B) | 109.5     |
| C(107)-C(108)-H(10C) | 109.5     |
| H(10A)-C(108)-H(10C) | 109.5     |
| H(10B)-C(108)-H(10C) | 109.5     |
| C(107)-C(109)-H(10D) | 109.5     |
| C(107)-C(109)-H(10E) | 109.5     |
| H(10D)-C(109)-H(10E) | 109.5     |
| C(107)-C(109)-H(10F) | 109.5     |
| H(10D)-C(109)-H(10F) | 109.5     |
| H(10E)-C(109)-H(10F) | 109.5     |
| C(107)-C(110)-H(11A) | 109.5     |
| C(107)-C(110)-H(11B) | 109.5     |
| H(11A)-C(110)-H(11B) | 109.5     |
| C(107)-C(110)-H(11C) | 109.5     |
| H(11A)-C(110)-H(11C) | 109.5     |
| H(11B)-C(110)-H(11C) | 109.5     |
| C(101)-C(111)-C(114) | 113.8(15) |
| C(101)-C(111)-C(112) | 116.0(13) |
| C(114)-C(111)-C(112) | 105.4(19) |
| C(101)-C(111)-C(113) | 107.6(17) |
| C(114)-C(111)-C(113) | 105.3(18) |
| C(112)-C(111)-C(113) | 108.1(18) |
| C(111)-C(112)-H(11D) | 109.5     |
| C(111)-C(112)-H(11E) | 109.5     |
| H(11D)-C(112)-H(11E) | 109.5     |
| C(111)-C(112)-H(11F) | 109.5     |
| H(11D)-C(112)-H(11F) | 109.5     |
| H(11E)-C(112)-H(11F) | 109.5     |
| C(111)-C(113)-H(11G) | 109.5     |
| C(111)-C(113)-H(11H) | 109.5     |
| H(11G)-C(113)-H(11H) | 109.5     |



|                      |           |
|----------------------|-----------|
| C(111)-C(113)-H(11I) | 109.5     |
| H(11G)-C(113)-H(11I) | 109.5     |
| H(11H)-C(113)-H(11I) | 109.5     |
| C(111)-C(114)-H(11J) | 109.5     |
| C(111)-C(114)-H(11K) | 109.5     |
| H(11J)-C(114)-H(11K) | 109.5     |
| C(111)-C(114)-H(11L) | 109.5     |
| H(11J)-C(114)-H(11L) | 109.5     |
| H(11K)-C(114)-H(11L) | 109.5     |
| N(7)-C(115)-H(11M)   | 109.5     |
| N(7)-C(115)-H(11N)   | 109.5     |
| H(11M)-C(115)-H(11N) | 109.5     |
| N(7)-C(115)-H(11O)   | 109.5     |
| H(11M)-C(115)-H(11O) | 109.5     |
| H(11N)-C(115)-H(11O) | 109.5     |
| N(8)-C(116)-H(11P)   | 109.5     |
| N(8)-C(116)-H(11Q)   | 109.5     |
| H(11P)-C(116)-H(11Q) | 109.5     |
| N(8)-C(116)-H(11R)   | 109.5     |
| H(11P)-C(116)-H(11R) | 109.5     |
| H(11Q)-C(116)-H(11R) | 109.5     |
| C(118)-C(117)-C(124) | 129.1(11) |
| C(118)-C(117)-Rh(2)  | 73.1(6)   |
| C(124)-C(117)-Rh(2)  | 108.1(7)  |
| C(118)-C(117)-H(117) | 112.8     |
| C(124)-C(117)-H(117) | 112.8     |
| Rh(2)-C(117)-H(117)  | 112.8     |
| C(117)-C(118)-C(119) | 123.2(12) |
| C(117)-C(118)-Rh(2)  | 70.3(5)   |
| C(119)-C(118)-Rh(2)  | 110.1(7)  |
| C(117)-C(118)-H(118) | 114.9     |
| C(119)-C(118)-H(118) | 114.9     |
| Rh(2)-C(118)-H(118)  | 114.9     |
| C(120)-C(119)-C(118) | 113.5(9)  |
| C(120)-C(119)-H(11S) | 108.9     |
| C(118)-C(119)-H(11S) | 108.9     |
| C(120)-C(119)-H(11T) | 108.9     |
| C(118)-C(119)-H(11T) | 108.9     |

|                      |           |
|----------------------|-----------|
| H(11S)-C(119)-H(11T) | 107.7     |
| C(121)-C(120)-C(119) | 113.5(9)  |
| C(121)-C(120)-H(12A) | 108.9     |
| C(119)-C(120)-H(12A) | 108.9     |
| C(121)-C(120)-H(12B) | 108.9     |
| C(119)-C(120)-H(12B) | 108.9     |
| H(12A)-C(120)-H(12B) | 107.7     |
| C(122)-C(121)-C(120) | 127.6(10) |
| C(122)-C(121)-Rh(2)  | 72.5(6)   |
| C(120)-C(121)-Rh(2)  | 105.9(7)  |
| C(122)-C(121)-H(121) | 113.9     |
| C(120)-C(121)-H(121) | 113.9     |
| Rh(2)-C(121)-H(121)  | 113.9     |
| C(121)-C(122)-C(123) | 125.0(10) |
| C(121)-C(122)-Rh(2)  | 71.5(6)   |
| C(123)-C(122)-Rh(2)  | 111.0(7)  |
| C(121)-C(122)-H(122) | 113.9     |
| C(123)-C(122)-H(122) | 113.9     |
| Rh(2)-C(122)-H(122)  | 113.9     |
| C(122)-C(123)-C(124) | 112.4(9)  |
| C(122)-C(123)-H(12C) | 109.1     |
| C(124)-C(123)-H(12C) | 109.1     |
| C(122)-C(123)-H(12D) | 109.1     |
| C(124)-C(123)-H(12D) | 109.1     |
| H(12C)-C(123)-H(12D) | 107.9     |
| C(117)-C(124)-C(123) | 113.0(9)  |
| C(117)-C(124)-H(12E) | 109.0     |
| C(123)-C(124)-H(12E) | 109.0     |
| C(117)-C(124)-H(12F) | 109.0     |
| C(123)-C(124)-H(12F) | 109.0     |
| H(12E)-C(124)-H(12F) | 107.8     |
| Cl(1)-C(125)-Cl(3)   | 112.6(13) |
| Cl(1)-C(125)-Cl(2)   | 108.2(9)  |
| Cl(3)-C(125)-Cl(2)   | 107.9(9)  |
| Cl(1)-C(125)-H(125)  | 109.4     |
| Cl(3)-C(125)-H(125)  | 109.4     |
| Cl(2)-C(125)-H(125)  | 109.4     |
| Cl(5)-C(126)-Cl(4)   | 112.1(12) |

|                     |           |
|---------------------|-----------|
| Cl(5)-C(126)-Cl(6)  | 103.5(9)  |
| Cl(4)-C(126)-Cl(6)  | 109.3(10) |
| Cl(5)-C(126)-H(126) | 110.6     |
| Cl(4)-C(126)-H(126) | 110.6     |
| Cl(6)-C(126)-H(126) | 110.6     |
| Cl(7)-C(127)-Cl(9)  | 103.4(16) |
| Cl(7)-C(127)-Cl(8)  | 112.8(14) |
| Cl(9)-C(127)-Cl(8)  | 121.3(16) |
| Cl(7)-C(127)-H(127) | 106.1     |
| Cl(9)-C(127)-H(127) | 106.1     |
| Cl(8)-C(127)-H(127) | 106.1     |

---

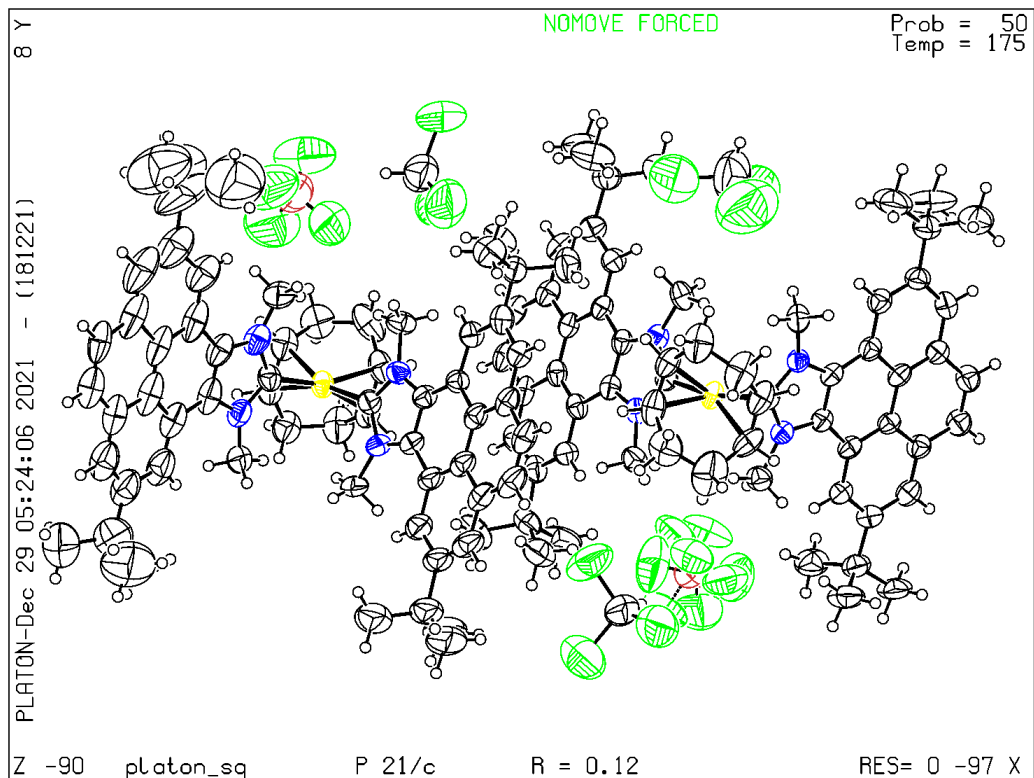

**Fig. S196.** Crystal structure of rhodium complex **4b**.

### 13. The calculated steric bulkiness of oligomer analogues.

The percent buried volumes ( $\% V_{\text{bur}}$ ) and steric maps of complexes **3**, **4b** were calculated by SambVca 2.1. With this hint in our mind, the steric bulkiness around Rh center in the possible oligomer analogues with unit number ( $n = 3, 5, \text{ and } 7$ ) was calculated using PBE /LANL2DZ with D3BJ dispersion correction.

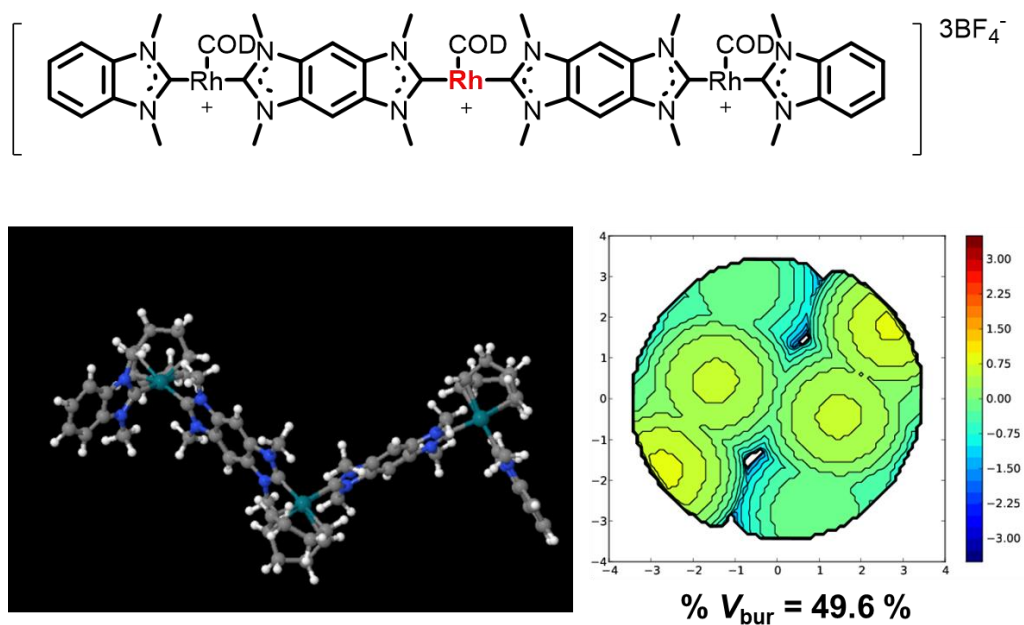

Fig. S197. Percent buried volumes and steric maps of oligomer-3Rh analogue.

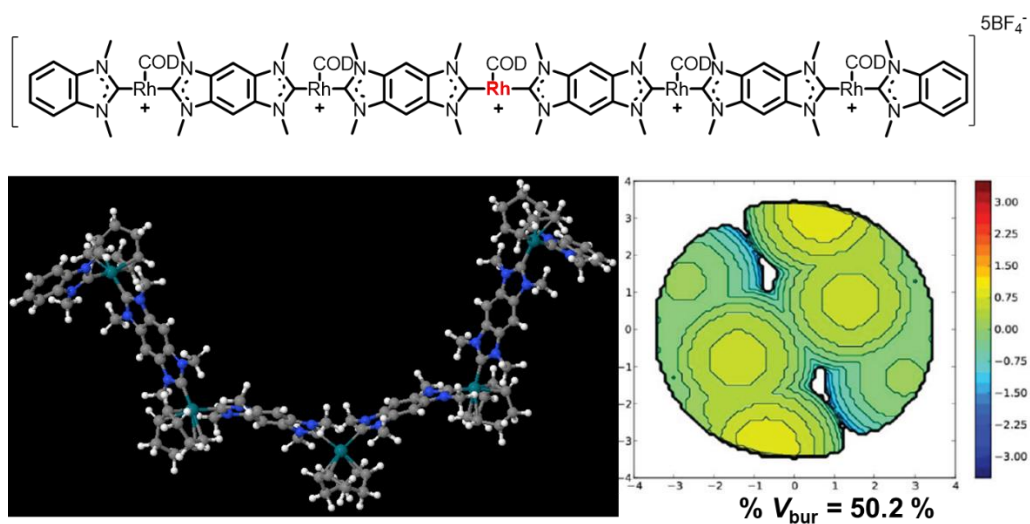

Fig. S198. Percent buried volumes and steric maps of oligomer-5Rh analogue.

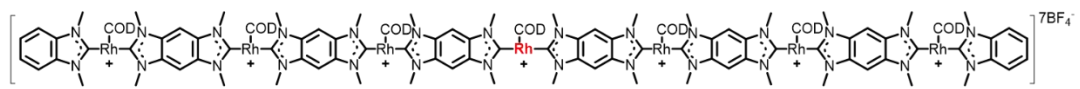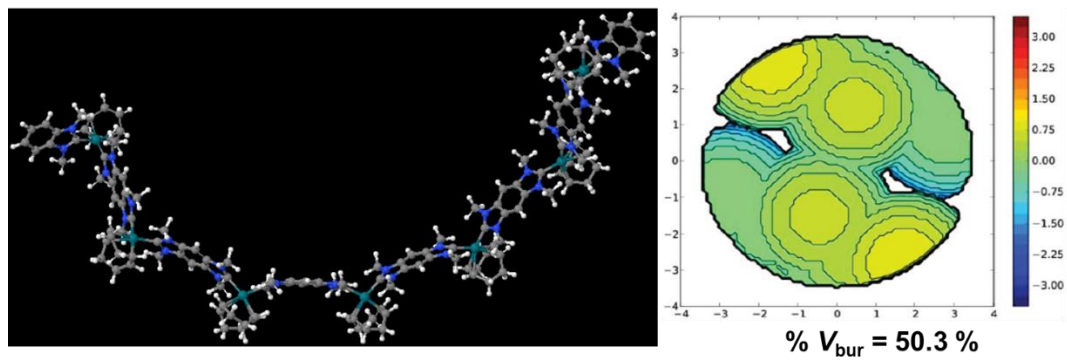

**Fig. S199.** Percent buried volumes and steric maps of oligomer-7Rh analogue.

## 14. References

- [1]. S. Gonell and E. Peris, *ACS Catal.*, 2014, **4**, 2811-2817.
- [2]. S. Ibanez, A. Guerrero, M. Poyatos and E. Peris, *Chem. Eur. J.*, 2015, **21**, 10566-10575.
- [3]. J. Chen, J. Lin and J. Xiao, *Chem. Commun.*, 2018, **54**, 7034-7037.
- [4]. M. T. Peruzzi, Q. Mei, S. J. Lee and M. R. Gagne, *Chem. Commun.*, 2018, **54**, 5855-5858.
- [5]. N. A. Larionova, J. M. Ondozabal, E. G. Smith and X. C. Cambeiro, *Org. Lett.*, 2021, **23**, 5383-5388.
- [6]. Z. Lu, Q. Zheng, S. Yang, C. Qian, Y. Shen and T. Tu, *ACS Catal.*, 2021, **11**, 10796-10801.
- [7]. T. Satoh, A. Osawa, T. Ohbayashi and A. Kondo, *Tetrahedron.*, 2006, **62**, 7892-7901.
- [8]. H. Liu, D. Yang, D.-L. Wang, P. Wang, Y. Lu, V.-T. Giang and Y. Liu, *Chem. Commun.*, 2018, **54**, 7979-7982.
- [9]. Z.-C. Wang, D. Shen, J. Gao, X. Jia, Y. Xu and S.-L. Shi, *Chem. Commun.*, 2019, **55**, 8848-8851.
- [10] H. Reed, T. R. Paul and William J. Chain, *J. Org. Chem.*, 2018, **83**, 11359-11368.
- [11]. A. Wetzel, S. Wöckel, M. Schelwies, M. K. Brinks, F. Rominger, P. Hofmann and M. Limbach, *Org. Lett.*, 2013, **15**, 2-5.
- [12]. H. Chung and Y. K. Chung, *J. Org. Chem.*, 2018, **83**, 8533-8542.
- [13]. S. M. Bronner and R. H. Grubbs, *Chem. Sci.*, 2014, **5**, 101-106.
- [14]. J. Yang, F. G. Delolo, A. Spannenberg, R. Jackstell and M. Beller, *Angew. Chem., Int. Ed.*, 2022, **61**, e202112597.
- [15]. I. Sorribes, J. R. Cabrero-Antonino, C. Vicent, K. Junge and M. Beller, *J. Am. Chem. Soc.*, 2015, **137**, 13580-13587.
- [16]. Y. Ogiwara, W. Shimoda, K. Ide, T. Nakajima and N. Sakai, *Eur. J. Org. Chem.*, 2017, **20**, 2866-2870.
- [17]. T. J. Brown, M. Cumbes, L. J. Diorazio, G. J. Clarkson and M. Wills, *J. Org. Chem.*, 2017, **82**, 10489-10503.
- [18]. S. K. Pedersen, H. G. Gudmundsson, D. U. Nielsen, B. S. Donslund, H. C. D. Hammershøj, K. Daasbjerg and T. Skrydstrup, *Nat. Catal.*, 2020, **3**, 843-850.
